# Supplementary material
Source: publisher figshare collection journal article supplement (https://acs.figshare.com/ndownloader/files/9659941)
Supplement: Supplementary file 1 [file 9659941]

 
data_007-16109 
  
_audit_creation_method            'SHELXL-2014/7' 
_shelx_SHELXL_version_number      '2014/7' 
_chemical_name_systematic         ? 
_chemical_name_common             ? 
_chemical_melting_point           ? 
_chemical_formula_moiety          'C14 H20 O3'  
_chemical_formula_sum 
 'C14 H20 O3' 
_chemical_formula_weight          236.30 
  
loop_ 
 _atom_type_symbol 
 _atom_type_description 
 _atom_type_scat_dispersion_real 
 _atom_type_scat_dispersion_imag 
 _atom_type_scat_source 
 'C'  'C'   0.0181   0.0091 
 'International Tables Vol C Tables 4.2.6.8 and 6.1.1.4' 
 'H'  'H'   0.0000   0.0000 
 'International Tables Vol C Tables 4.2.6.8 and 6.1.1.4' 
 'O'  'O'   0.0492   0.0322 
 'International Tables Vol C Tables 4.2.6.8 and 6.1.1.4' 
  
_space_group_crystal_system       monoclinic 
_space_group_IT_number            4 
_space_group_name_H-M_alt         'P 21' 
_space_group_name_Hall            'P 2yb' 
  
_shelx_space_group_comment 
; 
The symmetry employed for this shelxl refinement is uniquely defined 
by the following loop, which should always be used as a source of 
symmetry information in preference to the above space-group names. 
They are only intended as comments. 
; 
  
loop_ 
 _space_group_symop_operation_xyz 
 'x, y, z' 
 '-x, y+1/2, -z' 
  
_cell_length_a                    8.5539(6) 
_cell_length_b                    7.6851(5) 
_cell_length_c                    10.5736(7) 
_cell_angle_alpha                 90 
_cell_angle_beta                  113.779(4) 
_cell_angle_gamma                 90 
_cell_volume                      636.08(8) 
_cell_formula_units_Z             2 
_cell_measurement_temperature     93(2) 
_cell_measurement_reflns_used     122 
_cell_measurement_theta_min       4.6 
_cell_measurement_theta_max       68.3 
  
_exptl_crystal_description        Block
_exptl_crystal_colour             Colorless 
_exptl_crystal_density_meas       ? 
_exptl_crystal_density_method     'not measured' 
_exptl_crystal_density_diffrn     1.234 
_exptl_crystal_F_000              256 
_exptl_transmission_factor_min    ? 
_exptl_transmission_factor_max    ? 
_exptl_crystal_size_max           0.220 
_exptl_crystal_size_mid           0.210 
_exptl_crystal_size_min           0.150 
_exptl_absorpt_coefficient_mu     0.687 
_shelx_estimated_absorpt_T_min    0.864 
_shelx_estimated_absorpt_T_max    0.904 
_exptl_absorpt_correction_type    multi-scan 
_exptl_absorpt_correction_T_min   0.784 
_exptl_absorpt_correction_T_max   1.000 
_exptl_absorpt_process_details    'Jacobson, R. (1998) Private Communication' 
_exptl_absorpt_special_details    ? 
_diffrn_ambient_temperature       93(2) 
_diffrn_radiation_wavelength      1.54178 
_diffrn_radiation_type            CuK\a 
_diffrn_source                    'Sealed Tube' 
_diffrn_measurement_device_type   'Rigaku Saturn 944+ CCD' 
_diffrn_measurement_method        \w 
_diffrn_detector_area_resol_mean  22.2 
_diffrn_reflns_number             22671 
_diffrn_reflns_av_unetI/netI      0.0276 
_diffrn_reflns_av_R_equivalents   0.0608 
_diffrn_reflns_limit_h_min        -10 
_diffrn_reflns_limit_h_max        10 
_diffrn_reflns_limit_k_min        -9 
_diffrn_reflns_limit_k_max        9 
_diffrn_reflns_limit_l_min        -12 
_diffrn_reflns_limit_l_max        11 
_diffrn_reflns_theta_min          4.570 
_diffrn_reflns_theta_max          67.944 
_diffrn_reflns_theta_full         67.679 
_diffrn_measured_fraction_theta_max   0.973 
_diffrn_measured_fraction_theta_full  0.982 
_diffrn_reflns_Laue_measured_fraction_max    0.973 
_diffrn_reflns_Laue_measured_fraction_full   0.982 
_diffrn_reflns_point_group_measured_fraction_max   0.969 
_diffrn_reflns_point_group_measured_fraction_full  0.979 
_reflns_number_total              2260 
_reflns_number_gt                 2237 
_reflns_threshold_expression      'I > 2\s(I)' 
_reflns_Friedel_coverage          0.842 
_reflns_Friedel_fraction_max      0.965 
_reflns_Friedel_fraction_full     0.976 
  
_reflns_special_details 
; 
 Reflections were merged by SHELXL according to the crystal 
 class for the calculation of statistics and refinement. 
  
 _reflns_Friedel_fraction is defined as the number of unique 
 Friedel pairs measured divided by the number that would be 
 possible theoretically, ignoring centric projections and 
 systematic absences. 
; 
  
_computing_data_collection        'CrystalClear-SM Expert 2.0 r15 (Rigaku, 2011)' 
_computing_cell_refinement        'CrystalClear-SM Expert 2.0 r15 (Rigaku, 2011)' 
_computing_data_reduction         'CrystalClear-SM Expert 2.0 r15 (Rigaku, 2011)' 
_computing_structure_solution     'SHELXT-2014/5 (Sheldrick, 2014)' 
_computing_structure_refinement 'SHELXL-2014/7 (Sheldrick, 2014)' 
_computing_molecular_graphics 
; 
Dolomanov, O.V.; Bourhis, L.J.; Gildea, R.J.; Howard, J.A.K.; Puschmann, H., 
OLEX2: A complete structure solution, refinement and analysis program 
(2009). J. Appl. Cryst., 42, 339-341. 
; 
_computing_publication_material   'CIFTAB-2013/2 (Sheldrick, 2014)' 
_refine_special_details 
; 
 Refinement of F^2^ against ALL reflections.  The weighted R-factor wR and 
 goodness of fit S are based on F^2^, conventional R-factors R are based 
 on F, with F set to zero for negative F^2^. The threshold expression of 
 F^2^ > 2sigma(F^2^) is used only for calculating R-factors(gt) etc. and is 
 not relevant to the choice of reflections for refinement.  R-factors based 
 on F^2^ are statistically about twice as large as those based on F, and R- 
 factors based on ALL data will be even larger. 

The hydrogen atoms were first found in the difference map, then generated 
geometrically and refined as riding atoms with C-H distances = 0.95 - 0.99 
angstroms and Uiso(H) = 1.2 times Ueq(C) for CH and CH2 groups and Uiso(H) 
= 1.5 times Ueq(C) for CH3 groups. The only exception is H3, which was found 
in the  difference map and semi-freely refined.  The O-H distance was restrained 
to a value of 1.00(2).
; 
_refine_ls_structure_factor_coef  Fsqd 
_refine_ls_matrix_type            full 
_refine_ls_weighting_scheme       calc 
_refine_ls_weighting_details 
'w=1/[\s^2^(Fo^2^)+(0.0385P)^2^+0.0744P] where P=(Fo^2^+2Fc^2^)/3' 
_atom_sites_solution_primary      direct 
_atom_sites_solution_secondary    difmap 
_atom_sites_solution_hydrogens    mixed 
_refine_ls_hydrogen_treatment     mixed 
_refine_ls_extinction_method      none 
_refine_ls_extinction_coef        . 
_refine_ls_abs_structure_details 
; 
 Flack x determined using 1019 quotients [(I+)-(I-)]/[(I+)+(I-)] 
 (Parsons, Flack and Wagner, Acta Cryst. B69 (2013) 249-259). 
; 
_refine_ls_abs_structure_Flack    0.02(6) 
_chemical_absolute_configuration  ad 
_refine_ls_number_reflns          2260 
_refine_ls_number_parameters      160 
_refine_ls_number_restraints      2 
_refine_ls_R_factor_all           0.0274 
_refine_ls_R_factor_gt            0.0272 
_refine_ls_wR_factor_ref          0.0717 
_refine_ls_wR_factor_gt           0.0716 
_refine_ls_goodness_of_fit_ref    1.084 
_refine_ls_restrained_S_all       1.086 
_refine_ls_shift/su_max           0.000 
_refine_ls_shift/su_mean          0.000 
  
loop_ 
 _atom_site_label 
 _atom_site_type_symbol 
 _atom_site_fract_x 
 _atom_site_fract_y 
 _atom_site_fract_z 
 _atom_site_U_iso_or_equiv 
 _atom_site_adp_type 
 _atom_site_occupancy 
 _atom_site_site_symmetry_order 
 _atom_site_calc_flag 
 _atom_site_refinement_flags_posn 
 _atom_site_refinement_flags_adp 
 _atom_site_refinement_flags_occupancy 
 _atom_site_disorder_assembly 
 _atom_site_disorder_group 
O1 O 0.49505(15) 0.40605(17) 0.06414(12) 0.0300(3) Uani 1 1 d . . . . . 
O2 O 0.25313(16) 0.54856(18) -0.04688(12) 0.0340(3) Uani 1 1 d . . . . . 
O3 O 0.60379(17) 0.17951(16) 0.22052(13) 0.0301(3) Uani 1 1 d D . . . . 
H3 H 0.660(3) 0.124(4) 0.172(3) 0.056(8) Uiso 1 1 d D . . . . 
C1 C 0.5442(2) 0.4571(2) 0.29986(17) 0.0231(4) Uani 1 1 d . . . . . 
H1 H 0.5453 0.3791 0.3759 0.028 Uiso 1 1 calc R U . . . 
C2 C 0.6117(2) 0.3569(2) 0.20617(18) 0.0264(4) Uani 1 1 d . . . . . 
C3 C 0.7844(2) 0.4329(3) 0.22635(19) 0.0294(4) Uani 1 1 d . . . . . 
H3A H 0.8038 0.4258 0.1403 0.035 Uiso 1 1 calc R U . . . 
H3B H 0.8786 0.3726 0.3016 0.035 Uiso 1 1 calc R U . . . 
C4 C 0.7681(2) 0.6217(2) 0.2647(2) 0.0289(4) Uani 1 1 d . . . . . 
H4A H 0.7003 0.6908 0.1816 0.035 Uiso 1 1 calc R U . . . 
H4B H 0.8819 0.6760 0.3118 0.035 Uiso 1 1 calc R U . . . 
C5 C 0.6758(2) 0.6086(2) 0.36260(18) 0.0259(4) Uani 1 1 d . . . . . 
C6 C 0.5935(2) 0.7823(2) 0.37514(19) 0.0299(4) Uani 1 1 d . . . . . 
H6A H 0.5725 0.7804 0.4606 0.036 Uiso 1 1 calc R U . . . 
H6B H 0.6749 0.8779 0.3840 0.036 Uiso 1 1 calc R U . . . 
C7 C 0.4261(2) 0.8202(2) 0.2529(2) 0.0310(4) Uani 1 1 d . . . . . 
H7A H 0.4465 0.8272 0.1673 0.037 Uiso 1 1 calc R U . . . 
H7B H 0.3809 0.9339 0.2667 0.037 Uiso 1 1 calc R U . . . 
C8 C 0.2956(2) 0.6785(3) 0.23769(19) 0.0290(4) Uani 1 1 d . . . . . 
H8 H 0.2908 0.6652 0.3301 0.035 Uiso 1 1 calc R U . . . 
C9 C 0.3569(2) 0.5025(2) 0.20421(18) 0.0255(4) Uani 1 1 d . . . . . 
C10 C 0.3589(2) 0.4937(2) 0.06126(18) 0.0272(4) Uani 1 1 d . . . . . 
C11 C 0.7964(2) 0.5541(2) 0.50778(18) 0.0312(4) Uani 1 1 d . . . . . 
H11 H 0.7429 0.5151 0.5658 0.037 Uiso 1 1 calc R U . . . 
C12 C 0.9643(3) 0.5535(3) 0.5639(2) 0.0406(5) Uani 1 1 d . . . . . 
H12A H 1.0261 0.5909 0.5117 0.049 Uiso 1 1 calc R U . . . 
H12B H 1.0238 0.5158 0.6566 0.049 Uiso 1 1 calc R U . . . 
C13 C 0.1166(2) 0.7346(3) 0.1365(2) 0.0395(5) Uani 1 1 d . . . . . 
H13A H 0.0817 0.8384 0.1724 0.059 Uiso 1 1 calc R U . . . 
H13B H 0.0353 0.6402 0.1261 0.059 Uiso 1 1 calc R U . . . 
H13C H 0.1184 0.7611 0.0465 0.059 Uiso 1 1 calc R U . . . 
C14 C 0.2389(2) 0.3525(3) 0.20855(19) 0.0313(4) Uani 1 1 d . . . . . 
H14A H 0.1249 0.3688 0.1349 0.047 Uiso 1 1 calc R U . . . 
H14B H 0.2307 0.3521 0.2984 0.047 Uiso 1 1 calc R U . . . 
H14C H 0.2862 0.2413 0.1951 0.047 Uiso 1 1 calc R U . . . 
  
loop_ 
 _atom_site_aniso_label 
 _atom_site_aniso_U_11 
 _atom_site_aniso_U_22 
 _atom_site_aniso_U_33 
 _atom_site_aniso_U_23 
 _atom_site_aniso_U_13 
 _atom_site_aniso_U_12 
O1 0.0316(6) 0.0373(7) 0.0193(6) -0.0001(5) 0.0084(5) 0.0005(5) 
O2 0.0309(7) 0.0431(8) 0.0206(6) 0.0058(6) 0.0029(5) -0.0031(6) 
O3 0.0331(6) 0.0258(6) 0.0303(7) -0.0021(5) 0.0116(5) -0.0021(5) 
C1 0.0201(8) 0.0262(8) 0.0199(8) 0.0016(6) 0.0047(6) 0.0003(6) 
C2 0.0269(8) 0.0279(9) 0.0215(8) -0.0008(7) 0.0066(7) -0.0009(7) 
C3 0.0268(9) 0.0337(9) 0.0295(9) -0.0024(7) 0.0133(7) -0.0010(7) 
C4 0.0257(9) 0.0303(9) 0.0312(10) -0.0016(7) 0.0119(7) -0.0054(7) 
C5 0.0230(8) 0.0290(9) 0.0226(9) -0.0017(7) 0.0060(7) -0.0014(7) 
C6 0.0305(9) 0.0291(9) 0.0284(9) -0.0052(7) 0.0099(7) -0.0020(7) 
C7 0.0331(9) 0.0284(9) 0.0317(9) 0.0026(7) 0.0131(8) 0.0040(8) 
C8 0.0251(9) 0.0369(10) 0.0245(9) 0.0050(7) 0.0095(7) 0.0037(7) 
C9 0.0209(8) 0.0318(10) 0.0198(8) 0.0029(6) 0.0040(6) -0.0015(7) 
C10 0.0265(9) 0.0282(9) 0.0240(9) -0.0003(7) 0.0071(7) -0.0069(7) 
C11 0.0297(9) 0.0325(9) 0.0252(9) -0.0033(8) 0.0046(7) -0.0030(8) 
C12 0.0317(10) 0.0416(11) 0.0354(11) -0.0003(9) -0.0001(8) 0.0013(9) 
C13 0.0266(9) 0.0496(13) 0.0390(11) 0.0076(9) 0.0098(8) 0.0082(9) 
C14 0.0243(8) 0.0400(10) 0.0257(9) 0.0048(7) 0.0061(7) -0.0051(7) 
  
_geom_special_details 
; 
 All esds (except the esd in the dihedral angle between two l.s. planes) 
 are estimated using the full covariance matrix.  The cell esds are taken 
 into account individually in the estimation of esds in distances, angles 
 and torsion angles; correlations between esds in cell parameters are only 
 used when they are defined by crystal symmetry.  An approximate (isotropic) 
 treatment of cell esds is used for estimating esds involving l.s. planes. 
; 
  
loop_ 
 _geom_bond_atom_site_label_1 
 _geom_bond_atom_site_label_2 
 _geom_bond_distance 
 _geom_bond_site_symmetry_2 
 _geom_bond_publ_flag 
O1 C10 1.335(2) . ? 
O1 C2 1.478(2) . ? 
O2 C10 1.212(2) . ? 
O3 C2 1.376(2) . ? 
O3 H3 0.93(2) . ? 
C1 C2 1.540(3) . ? 
C1 C9 1.551(2) . ? 
C1 C5 1.568(2) . ? 
C1 H1 1.0000 . ? 
C2 C3 1.521(3) . ? 
C3 C4 1.528(3) . ? 
C3 H3A 0.9900 . ? 
C3 H3B 0.9900 . ? 
C4 C5 1.537(3) . ? 
C4 H4A 0.9900 . ? 
C4 H4B 0.9900 . ? 
C5 C11 1.523(2) . ? 
C5 C6 1.540(2) . ? 
C6 C7 1.521(2) . ? 
C6 H6A 0.9900 . ? 
C6 H6B 0.9900 . ? 
C7 C8 1.521(3) . ? 
C7 H7A 0.9900 . ? 
C7 H7B 0.9900 . ? 
C8 C13 1.534(3) . ? 
C8 C9 1.542(3) . ? 
C8 H8 1.0000 . ? 
C9 C10 1.520(3) . ? 
C9 C14 1.545(2) . ? 
C11 C12 1.314(3) . ? 
C11 H11 0.9500 . ? 
C12 H12A 0.9500 . ? 
C12 H12B 0.9500 . ? 
C13 H13A 0.9800 . ? 
C13 H13B 0.9800 . ? 
C13 H13C 0.9800 . ? 
C14 H14A 0.9800 . ? 
C14 H14B 0.9800 . ? 
C14 H14C 0.9800 . ? 
  
loop_ 
 _geom_angle_atom_site_label_1 
 _geom_angle_atom_site_label_2 
 _geom_angle_atom_site_label_3 
 _geom_angle 
 _geom_angle_site_symmetry_1 
 _geom_angle_site_symmetry_3 
 _geom_angle_publ_flag 
C10 O1 C2 112.19(13) . . ? 
C2 O3 H3 109.5(18) . . ? 
C2 C1 C9 104.49(14) . . ? 
C2 C1 C5 104.57(13) . . ? 
C9 C1 C5 119.05(14) . . ? 
C2 C1 H1 109.4 . . ? 
C9 C1 H1 109.4 . . ? 
C5 C1 H1 109.4 . . ? 
O3 C2 O1 108.79(14) . . ? 
O3 C2 C3 116.96(16) . . ? 
O1 C2 C3 105.31(14) . . ? 
O3 C2 C1 112.13(15) . . ? 
O1 C2 C1 104.52(13) . . ? 
C3 C2 C1 108.21(14) . . ? 
C2 C3 C4 102.40(14) . . ? 
C2 C3 H3A 111.3 . . ? 
C4 C3 H3A 111.3 . . ? 
C2 C3 H3B 111.3 . . ? 
C4 C3 H3B 111.3 . . ? 
H3A C3 H3B 109.2 . . ? 
C3 C4 C5 104.06(14) . . ? 
C3 C4 H4A 110.9 . . ? 
C5 C4 H4A 110.9 . . ? 
C3 C4 H4B 110.9 . . ? 
C5 C4 H4B 110.9 . . ? 
H4A C4 H4B 109.0 . . ? 
C11 C5 C4 111.94(15) . . ? 
C11 C5 C6 107.40(15) . . ? 
C4 C5 C6 112.20(15) . . ? 
C11 C5 C1 107.54(14) . . ? 
C4 C5 C1 103.87(14) . . ? 
C6 C5 C1 113.87(14) . . ? 
C7 C6 C5 113.55(15) . . ? 
C7 C6 H6A 108.9 . . ? 
C5 C6 H6A 108.9 . . ? 
C7 C6 H6B 108.9 . . ? 
C5 C6 H6B 108.9 . . ? 
H6A C6 H6B 107.7 . . ? 
C6 C7 C8 110.60(15) . . ? 
C6 C7 H7A 109.5 . . ? 
C8 C7 H7A 109.5 . . ? 
C6 C7 H7B 109.5 . . ? 
C8 C7 H7B 109.5 . . ? 
H7A C7 H7B 108.1 . . ? 
C7 C8 C13 110.84(16) . . ? 
C7 C8 C9 110.47(14) . . ? 
C13 C8 C9 115.00(16) . . ? 
C7 C8 H8 106.7 . . ? 
C13 C8 H8 106.7 . . ? 
C9 C8 H8 106.7 . . ? 
C10 C9 C8 114.12(14) . . ? 
C10 C9 C14 105.41(14) . . ? 
C8 C9 C14 111.17(14) . . ? 
C10 C9 C1 102.43(14) . . ? 
C8 C9 C1 113.89(14) . . ? 
C14 C9 C1 109.15(14) . . ? 
O2 C10 O1 120.63(16) . . ? 
O2 C10 C9 128.22(17) . . ? 
O1 C10 C9 111.07(14) . . ? 
C12 C11 C5 128.96(18) . . ? 
C12 C11 H11 115.5 . . ? 
C5 C11 H11 115.5 . . ? 
C11 C12 H12A 120.0 . . ? 
C11 C12 H12B 120.0 . . ? 
H12A C12 H12B 120.0 . . ? 
C8 C13 H13A 109.5 . . ? 
C8 C13 H13B 109.5 . . ? 
H13A C13 H13B 109.5 . . ? 
C8 C13 H13C 109.5 . . ? 
H13A C13 H13C 109.5 . . ? 
H13B C13 H13C 109.5 . . ? 
C9 C14 H14A 109.5 . . ? 
C9 C14 H14B 109.5 . . ? 
H14A C14 H14B 109.5 . . ? 
C9 C14 H14C 109.5 . . ? 
H14A C14 H14C 109.5 . . ? 
H14B C14 H14C 109.5 . . ? 
  
loop_ 
 _geom_torsion_atom_site_label_1 
 _geom_torsion_atom_site_label_2 
 _geom_torsion_atom_site_label_3 
 _geom_torsion_atom_site_label_4 
 _geom_torsion 
 _geom_torsion_site_symmetry_1 
 _geom_torsion_site_symmetry_2 
 _geom_torsion_site_symmetry_3 
 _geom_torsion_site_symmetry_4 
 _geom_torsion_publ_flag 
C10 O1 C2 O3 109.97(16) . . . . ? 
C10 O1 C2 C3 -123.90(16) . . . . ? 
C10 O1 C2 C1 -9.97(18) . . . . ? 
C9 C1 C2 O3 -97.47(16) . . . . ? 
C5 C1 C2 O3 136.70(14) . . . . ? 
C9 C1 C2 O1 20.21(17) . . . . ? 
C5 C1 C2 O1 -105.63(14) . . . . ? 
C9 C1 C2 C3 132.06(15) . . . . ? 
C5 C1 C2 C3 6.23(18) . . . . ? 
O3 C2 C3 C4 -156.79(15) . . . . ? 
O1 C2 C3 C4 82.29(16) . . . . ? 
C1 C2 C3 C4 -29.04(18) . . . . ? 
C2 C3 C4 C5 40.93(18) . . . . ? 
C3 C4 C5 C11 78.36(17) . . . . ? 
C3 C4 C5 C6 -160.81(14) . . . . ? 
C3 C4 C5 C1 -37.38(17) . . . . ? 
C2 C1 C5 C11 -99.83(16) . . . . ? 
C9 C1 C5 C11 144.05(16) . . . . ? 
C2 C1 C5 C4 18.97(17) . . . . ? 
C9 C1 C5 C4 -97.14(18) . . . . ? 
C2 C1 C5 C6 141.30(15) . . . . ? 
C9 C1 C5 C6 25.2(2) . . . . ? 
C11 C5 C6 C7 -158.30(16) . . . . ? 
C4 C5 C6 C7 78.27(19) . . . . ? 
C1 C5 C6 C7 -39.4(2) . . . . ? 
C5 C6 C7 C8 60.0(2) . . . . ? 
C6 C7 C8 C13 167.51(16) . . . . ? 
C6 C7 C8 C9 -63.83(19) . . . . ? 
C7 C8 C9 C10 -68.90(19) . . . . ? 
C13 C8 C9 C10 57.5(2) . . . . ? 
C7 C8 C9 C14 172.04(14) . . . . ? 
C13 C8 C9 C14 -61.6(2) . . . . ? 
C7 C8 C9 C1 48.2(2) . . . . ? 
C13 C8 C9 C1 174.62(16) . . . . ? 
C2 C1 C9 C10 -22.47(17) . . . . ? 
C5 C1 C9 C10 93.69(17) . . . . ? 
C2 C1 C9 C8 -146.20(14) . . . . ? 
C5 C1 C9 C8 -30.0(2) . . . . ? 
C2 C1 C9 C14 88.91(17) . . . . ? 
C5 C1 C9 C14 -154.93(15) . . . . ? 
C2 O1 C10 O2 177.67(15) . . . . ? 
C2 O1 C10 C9 -5.11(19) . . . . ? 
C8 C9 C10 O2 -41.8(2) . . . . ? 
C14 C9 C10 O2 80.5(2) . . . . ? 
C1 C9 C10 O2 -165.35(18) . . . . ? 
C8 C9 C10 O1 141.27(14) . . . . ? 
C14 C9 C10 O1 -96.46(16) . . . . ? 
C1 C9 C10 O1 17.70(18) . . . . ? 
C4 C5 C11 C12 15.5(3) . . . . ? 
C6 C5 C11 C12 -108.1(2) . . . . ? 
C1 C5 C11 C12 129.0(2) . . . . ? 
  
loop_ 
 _geom_hbond_atom_site_label_D 
 _geom_hbond_atom_site_label_H 
 _geom_hbond_atom_site_label_A 
 _geom_hbond_distance_DH 
 _geom_hbond_distance_HA 
 _geom_hbond_distance_DA 
 _geom_hbond_angle_DHA 
 _geom_hbond_site_symmetry_A 
O3 H3 O2  0.93(2) 1.85(2) 2.7738(18) 168(3) 2_645 
  
_refine_diff_density_max    0.209 
_refine_diff_density_min   -0.129 
_refine_diff_density_rms    0.027 
  
_shelx_res_file 
; 
  
    007-16109.res created by SHELXL-2014/7 
  
TITL 007-16109 
CELL 1.54178 8.5539 7.6851 10.5736 90 113.779 90 
ZERR 2 0.0006 0.0005 0.0007 0 0.004 0 
LATT -1 
SYMM -X,0.5+Y,-Z 
SFAC C H O 
UNIT 28 40 6 
EQIV $1 1-X,-0.5+Y,-Z 
DFIX 1 O3 H3 
  
L.S. 10 
SIZE 0.22 0.21 0.15 
TEMP -180 
HTAB O3 O2_$1 
BOND $H 
MORE -1 
CONF 
ACTA 
REM <olex2.extras> 
REM <HklSrc "%.\\xprep_a.hkl"> 
REM </olex2.extras> 
  
WGHT    0.038500    0.074400 
FVAR       1.94244 
O1    3    0.495049    0.406048    0.064145    11.00000    0.03156    0.03734 = 
         0.01928   -0.00012    0.00844    0.00047 
O2    3    0.253130    0.548562   -0.046876    11.00000    0.03093    0.04310 = 
         0.02065    0.00578    0.00292   -0.00313 
O3    3    0.603791    0.179513    0.220521    11.00000    0.03306    0.02577 = 
         0.03031   -0.00211    0.01163   -0.00208 
H3    2    0.659714    0.123784    0.172042    11.00000    0.05606 
C1    1    0.544161    0.457134    0.299859    11.00000    0.02005    0.02617 = 
         0.01988    0.00162    0.00474    0.00027 
AFIX  13 
H1    2    0.545348    0.379065    0.375904    11.00000   -1.20000 
AFIX   0 
C2    1    0.611743    0.356859    0.206168    11.00000    0.02685    0.02793 = 
         0.02147   -0.00080    0.00662   -0.00090 
C3    1    0.784356    0.432884    0.226354    11.00000    0.02676    0.03373 = 
         0.02952   -0.00244    0.01331   -0.00099 
AFIX  23 
H3A   2    0.803768    0.425814    0.140309    11.00000   -1.20000 
H3B   2    0.878609    0.372603    0.301575    11.00000   -1.20000 
AFIX   0 
C4    1    0.768065    0.621665    0.264699    11.00000    0.02569    0.03028 = 
         0.03122   -0.00156    0.01190   -0.00536 
AFIX  23 
H4A   2    0.700320    0.690811    0.181564    11.00000   -1.20000 
H4B   2    0.881948    0.676013    0.311757    11.00000   -1.20000 
AFIX   0 
C5    1    0.675812    0.608561    0.362596    11.00000    0.02302    0.02903 = 
         0.02261   -0.00174    0.00603   -0.00143 
C6    1    0.593531    0.782278    0.375140    11.00000    0.03051    0.02908 = 
         0.02835   -0.00525    0.00989   -0.00195 
AFIX  23 
H6A   2    0.572533    0.780355    0.460610    11.00000   -1.20000 
H6B   2    0.674887    0.877860    0.383992    11.00000   -1.20000 
AFIX   0 
C7    1    0.426110    0.820233    0.252926    11.00000    0.03306    0.02835 = 
         0.03174    0.00264    0.01315    0.00395 
AFIX  23 
H7A   2    0.446539    0.827177    0.167328    11.00000   -1.20000 
H7B   2    0.380875    0.933947    0.266702    11.00000   -1.20000 
AFIX   0 
C8    1    0.295622    0.678452    0.237689    11.00000    0.02511    0.03690 = 
         0.02449    0.00496    0.00945    0.00367 
AFIX  13 
H8    2    0.290794    0.665219    0.330131    11.00000   -1.20000 
AFIX   0 
C9    1    0.356862    0.502549    0.204211    11.00000    0.02094    0.03177 = 
         0.01979    0.00286    0.00405   -0.00147 
C10   1    0.358929    0.493721    0.061263    11.00000    0.02651    0.02821 = 
         0.02400   -0.00025    0.00706   -0.00685 
C11   1    0.796430    0.554087    0.507781    11.00000    0.02975    0.03254 = 
         0.02518   -0.00328    0.00459   -0.00295 
AFIX  43 
H11   2    0.742917    0.515117    0.565829    11.00000   -1.20000 
AFIX   0 
C12   1    0.964285    0.553531    0.563869    11.00000    0.03173    0.04157 = 
         0.03540   -0.00033   -0.00014    0.00130 
AFIX  93 
H12A  2    1.026139    0.590895    0.511671    11.00000   -1.20000 
H12B  2    1.023785    0.515766    0.656616    11.00000   -1.20000 
AFIX   0 
C13   1    0.116603    0.734606    0.136531    11.00000    0.02657    0.04964 = 
         0.03899    0.00760    0.00976    0.00825 
AFIX 137 
H13A  2    0.081705    0.838407    0.172380    11.00000   -1.50000 
H13B  2    0.035335    0.640169    0.126126    11.00000   -1.50000 
H13C  2    0.118432    0.761108    0.046477    11.00000   -1.50000 
AFIX   0 
C14   1    0.238864    0.352483    0.208545    11.00000    0.02431    0.04001 = 
         0.02572    0.00479    0.00609   -0.00513 
AFIX 137 
H14A  2    0.124871    0.368834    0.134929    11.00000   -1.50000 
H14B  2    0.230715    0.352134    0.298374    11.00000   -1.50000 
H14C  2    0.286179    0.241317    0.195082    11.00000   -1.50000 
AFIX   0 
HKLF 4 
  
REM  007-16109 
REM R1 =  0.0272 for    2237 Fo > 4sig(Fo)  and  0.0274 for all    2260 data 
REM    160 parameters refined using      2 restraints 
  
END 
  
WGHT      0.0383      0.0747 
  
REM Highest difference peak  0.209,  deepest hole -0.129,  1-sigma level  0.027 
Q1    1   0.3236  0.5846  0.2196  11.00000  0.05    0.21 
Q2    1   0.6260  0.6869  0.3645  11.00000  0.05    0.17 
Q3    1   0.6067  0.5318  0.3355  11.00000  0.05    0.15 
Q4    1   0.3648  0.7511  0.2419  11.00000  0.05    0.14 
Q5    1   0.3021  0.4386  0.1988  11.00000  0.05    0.14 
Q6    1   0.7792  0.5270  0.2350  11.00000  0.05    0.14 
Q7    1   0.7219  0.6232  0.3178  11.00000  0.05    0.13 
Q8    1   0.4529  0.4853  0.2654  11.00000  0.05    0.12 
Q9    1   0.7276  0.5845  0.4217  11.00000  0.05    0.11 
Q10   1   0.5812  0.3988  0.2591  11.00000  0.05    0.10 
Q11   1   0.8822  0.4709  0.5325  11.00000  0.05    0.10 
Q12   1   0.6270  0.2699  0.2153  11.00000  0.05    0.10 
Q13   1   0.7109  0.3879  0.2250  11.00000  0.05    0.09 
Q14   1   0.4926  0.2831  0.0245  11.00000  0.05    0.09 
Q15   1   0.2227  0.6769 -0.0388  11.00000  0.05    0.09 
Q16   1   0.4866  0.5291  0.0562  11.00000  0.05    0.09 
Q17   1   0.3215  0.4347 -0.0790  11.00000  0.05    0.09 
Q18   1   0.3531  0.5131  0.1393  11.00000  0.05    0.09 
Q19   1   0.5017  0.7962  0.3152  11.00000  0.05    0.09 
Q20   1   0.5560  0.0642  0.2475  11.00000  0.05    0.08 
; 
_shelx_res_checksum   22725 
  
_shelx_hkl_file 
; 
   0   0   1 1024.39   93.20 
   0   0  -1 1116.16  101.43 
   0   0  -1 1116.15  101.56 
   0   0   1 1139.89  103.59 
   0   0  -1 1351.87  122.93 
   0   0   1 1056.81   96.02 
   0   0  -1 1154.92  105.13 
   0   0  -1 1153.37  104.81 
   0   0   1 1129.51  102.70 
   0   0  -1 1148.97  104.43 
   0   0  -1 1165.30  105.89 
   0   0  -1 1268.49  115.27 
   0   0  -1 1444.46  131.29 
   0   0  -1 1605.98  145.93 
   0   0  -1 1476.69  134.21 
   0   0  -3  537.30   48.88 
   0   0   3  565.13   51.43 
   0   0  -3  667.33   61.00 
   0   0  -3  543.16   49.66 
   0   0  -3  721.49   65.58 
   0   0  -3  594.51   54.05 
   0   0  -3  652.38   59.45 
   0   0  -3  746.85   68.12 
   0   0   3  649.01   59.01 
   0   0   3  651.17   59.28 
   0   0  -4 3044.95  276.61 
   0   0   4 3314.36  301.29 
   0   0  -4 4195.36  381.79 
   0   0  -4 3511.61  319.24 
   0   0  -4 3478.77  316.04 
   0   0   4 3006.41  273.59 
   0   0  -4 3268.36  297.31 
   0   0  -4 3784.36  344.24 
   0   0   4 4011.30  364.51 
   0   0   4 3654.30  333.82 
   0   0   4 3456.54  320.76 
   0   0  -5  864.03   59.93 
   0   0  -5  747.52   51.98 
   0   0  -5  766.25   53.04 
   0   0   5  695.33   48.41 
   0   0  -5  767.83   53.38 
   0   0  -5  819.40   56.70 
   0   0   5  884.51   61.50 
   0   0   5  748.93   54.63 
   0   0   5  749.88   53.87 
   0   0  -5  817.42   56.53 
   0   0  -5  812.06   56.16 
   0   0  -5  698.56   48.38 
   0   0   6  975.62   76.14 
   0   0  -6  833.20   66.00 
   0   0  -6  864.93   66.90 
   0   0  -6  893.75   69.23 
   0   0   6  995.97   76.93 
   0   0   6  877.44   68.62 
   0   0   6  796.29   62.99 
   0   0  -6  897.97   70.07 
   0   0  -6  829.05   63.90 
   0   0  -6  883.07   68.56 
   0   0  -6  832.86   64.56 
   0   0  -6  951.81   73.37 
   0   0  -6  881.46   69.73 
   0   0  -6  943.39   72.89 
   0   0   7 2923.70  252.02 
   0   0  -7 2795.27  236.63 
   0   0  -7 2537.01  183.77 
   0   0  -7 2925.10  247.53 
   0   0   7 2653.08  206.31 
   0   0   7 2703.23  230.88 
   0   0   7 2412.20  175.15 
   0   0  -7 2513.19  181.98 
   0   0  -7 2844.21  240.25 
   0   0  -7 2566.47  184.35 
   0   0  -7 2609.81  188.02 
   0   0  -7 2416.32  173.98 
   0   0  -7 2433.69  175.11 
   0   0  -7 2568.28  183.84 
   0   0  -7 2878.06  243.67 
   0   0  -7 2924.08  249.91 
   0   0   8   54.49    5.89 
   0   0  -8   43.18    4.72 
   0   0  -8   53.64    5.88 
   0   0   8   56.23    6.12 
   0   0   8   49.26    5.36 
   0   0  -8   52.95    5.82 
   0   0  -8   55.71    5.91 
   0   0  -8   52.44    5.58 
   0   0  -8   51.55    5.51 
   0   0  -8   56.10    6.03 
   0   0  -8   59.03    6.26 
   0   0  -8   59.70    6.36 
   0   0  -8   57.36    6.26 
   0   0  -9   24.91    1.87 
   0   0  -9   26.33    2.01 
   0   0  -9   26.01    1.95 
   0   0  -9   21.00    2.50 
   0   0  -9   25.33    1.93 
   0   0  -9   25.18    2.07 
   0   0 -10   66.54    5.73 
   0   0 -10   75.02    6.47 
   0   0 -10   55.11    4.83 
   0   0 -10   62.23    5.35 
   0   0 -10   60.77    5.25 
   0   0 -10   55.10    4.82 
   0   0 -11  238.09   31.21 
   0   0 -11  240.01   31.49 
   0   0 -11  258.27   35.82 
   0   0 -11  239.50   31.40 
   0   1   0    0.32    0.76 
   0  -1   0    0.43    0.83 
   0  -1   0    0.98    0.79 
   0   1   0    0.76    0.71 
   0  -1   0   -0.47    1.21 
   0   1   0    0.02    0.74 
   0   1   0    0.37    1.05 
   0  -1   0    1.48    0.98 
   0  -1   0    3.48    0.85 
   0  -1   0    0.33    0.86 
   0  -1   0   -0.16    0.83 
   0   1  -2 2702.73  245.63 
   0   1   2 3061.55  279.18 
   0  -1   2 2721.71  249.08 
   0  -1  -2 3143.44  287.23 
   0  -1   2 3110.99  286.83 
   0  -1  -2 3665.52  336.71 
   0   1   2 2806.66  255.10 
   0   1  -2 2536.32  230.42 
   0  -1  -2 2989.35  271.91 
   0   1  -2 2974.91  270.23 
   0   1   2 2978.68  270.82 
   0   1  -2 3144.34  311.93 
   0   1  -2 2806.60  255.00 
   0  -1  -2 2920.43  265.32 
   0  -1  -2 3467.73  315.23 
   0   1  -2 3424.67  314.44 
   0  -1   2 3076.65  282.43 
   0  -1  -2 3799.46  346.53 
   0  -1   2 3166.52  289.01 
   0  -1  -2 3767.07  344.19 
   0  -1   2 3211.81  292.34 
   0  -1  -2 3832.23  348.29 
   0  -1  -3 1759.05  161.46 
   0   1  -3 1621.68  147.44 
   0   1   3 1791.98  163.30 
   0  -1   3 1690.18  156.01 
   0  -1   3 1974.56  181.58 
   0  -1  -3 2132.59  195.33 
   0   1   3 1711.13  155.48 
   0   1  -3 1873.19  170.49 
   0  -1  -3 1832.98  166.56 
   0   1  -3 1905.25  173.14 
   0   1   3 1737.67  157.97 
   0   1  -3 1876.30  170.47 
   0   1  -3 1657.41  150.77 
   0  -1  -3 1713.97  156.09 
   0  -1  -3 2204.54  200.43 
   0   1  -3 1969.58  181.01 
   0  -1   3 2214.64  201.22 
   0  -1  -3 2313.05  212.28 
   0  -1   3 2015.48  183.21 
   0  -1  -3 2270.14  207.72 
   0  -1   3 1851.11  169.28 
   0  -1  -3 2354.87  214.93 
   0  -1  -4  532.16   48.50 
   0   1  -4  547.98   49.87 
   0   1   4  560.05   51.12 
   0  -1   4  539.43   50.32 
   0  -1   4  709.17   64.75 
   0  -1  -4  694.17   63.31 
   0   1   4  547.38   49.81 
   0   1  -4  529.43   48.16 
   0  -1  -4  564.76   51.44 
   0   1  -4  659.52   60.06 
   0  -1   4  496.61   45.15 
   0   1   4  571.15   52.02 
   0   1  -4  576.18   52.39 
   0  -1  -4  514.12   46.94 
   0  -1  -4  643.45   58.57 
   0   1  -4  625.85   57.86 
   0  -1   4  640.10   58.55 
   0  -1  -4  670.03   62.77 
   0  -1   4  649.83   59.56 
   0  -1  -4  704.24   65.11 
   0  -1   4  659.59   60.35 
   0  -1  -4  685.19   63.23 
   0   1  -5  734.88   51.04 
   0  -1   5  890.23   61.73 
   0  -1  -5  905.52   63.10 
   0   1   5  768.92   53.20 
   0   1  -5  692.13   51.52 
   0  -1  -5  828.30   57.30 
   0   1  -5  804.45   55.80 
   0   1   5  755.17   52.53 
   0   1  -5  818.36   56.67 
   0  -1  -5  785.49   55.49 
   0  -1  -5  909.26   63.04 
   0   1  -5  885.67   62.53 
   0  -1   5  880.32   62.19 
   0  -1  -5  861.24   62.37 
   0   1   5  769.44   57.75 
   0  -1   5  941.40   65.22 
   0   1   5  733.91   53.05 
   0  -1   5  731.61   52.78 
   0  -1  -5  721.09   50.51 
   0  -1  -5  767.46   54.26 
   0   1  -5  706.26   48.89 
   0   1  -5  775.10   54.31 
   0  -1   6  930.58   74.29 
   0  -1  -6  937.29   73.90 
   0   1  -6  871.55   67.17 
   0  -1  -6  857.53   66.32 
   0   1  -6  955.42   73.93 
   0   1   6  669.23   51.81 
   0   1  -6  850.98   65.67 
   0  -1  -6  842.21   65.52 
   0  -1  -6  945.05   72.90 
   0   1  -6  948.70   73.32 
   0   1   6  969.59   78.39 
   0  -1   6  937.76   72.82 
   0   1   6  848.33   68.74 
   0  -1   6  969.01   74.71 
   0  -1   6  899.65   69.53 
   0  -1  -6  972.99   75.15 
   0   1  -6  938.26   72.94 
   0  -1  -6  883.29   68.02 
   0   1  -6  860.55   66.65 
   0  -1  -6  989.51   76.25 
   0   1  -6  924.44   71.37 
   0  -1  -6  884.46   71.17 
   0   1  -6  867.90   67.00 
   0   1  -6  878.86   67.89 
   0  -1  -6  967.36   74.55 
   0   1  -6  874.18   67.44 
   0   1  -6  869.86   67.61 
   0  -1  -6  918.05   70.86 
   0   1  -6  941.89   72.82 
   0  -1  -6  955.47   75.08 
   0   1  -6  975.07   75.32 
   0  -1  -7  593.65   42.43 
   0   1  -7  606.40   43.68 
   0   1  -7  536.84   39.07 
   0  -1  -7  646.42   46.43 
   0   1  -7  645.84   46.35 
   0   1   7  611.80   49.59 
   0  -1   7  585.79   44.47 
   0   1   7  608.45   47.57 
   0  -1   7  586.96   42.09 
   0   1   7  595.05   44.55 
   0  -1  -7  603.92   45.62 
   0   1  -7  637.79   46.95 
   0  -1  -7  610.16   43.97 
   0   1  -7  663.30   47.68 
   0  -1  -7  643.10   48.08 
   0   1  -7  655.72   46.87 
   0  -1  -7  617.27   47.24 
   0   1  -7  660.93   47.55 
   0   1  -7  605.48   43.49 
   0  -1  -7  637.17   45.49 
   0   1  -7  630.32   45.17 
   0  -1  -7  671.56   47.95 
   0   1  -7  468.13   34.01 
   0  -1  -7  675.17   48.36 
   0   1  -7  654.57   47.09 
   0  -1  -7  626.21   50.59 
   0   1  -7  595.99   45.42 
   0  -1   8  416.77   33.72 
   0  -1  -8  360.89   29.23 
   0   1  -8  357.81   29.12 
   0   1  -8  347.64   28.27 
   0  -1   8  433.15   36.74 
   0  -1  -8  381.67   30.88 
   0   1   8  365.27   30.71 
   0  -1   8  346.04   28.24 
   0   1   8  346.26   28.69 
   0   1   8  357.09   29.46 
   0  -1  -8  412.33   33.45 
   0   1  -8  398.32   32.26 
   0  -1  -8  389.05   31.48 
   0   1  -8  379.63   30.86 
   0  -1  -8  418.12   33.82 
   0   1  -8  395.75   32.09 
   0  -1  -8  307.12   25.54 
   0   1  -8  373.24   30.69 
   0  -1  -8  348.44   29.22 
   0   1  -8  355.91   29.05 
   0  -1  -8  347.63   30.47 
   0   1  -8  285.99   44.94 
   0  -1  -8  407.70   32.95 
   0   1  -8  390.97   31.97 
   0  -1  -8  378.26   31.70 
   0   1  -8  372.14   30.13 
   0  -1  -9  920.05   72.59 
   0   1  -9  893.39   59.76 
   0  -1  -9  931.30   73.39 
   0   1  -9  847.54   57.29 
   0  -1  -9  948.72   74.78 
   0   1  -9  913.85   72.10 
   0   1  -9  834.70   56.44 
   0  -1  -9  754.99   53.85 
   0   1  -9  759.66   51.10 
   0   1  -9  849.70   57.36 
   0  -1  -9  922.61   72.90 
   0  -1  -9  894.04   59.72 
   0   1  -9  850.60   57.27 
   0  -1  -9  802.13   56.11 
   0   1  -9  810.69   54.55 
   0  -1 -10  111.94    9.50 
   0   1 -10  120.61   10.02 
   0  -1 -10  101.32    8.50 
   0   1 -10  108.84    9.09 
   0  -1 -10  117.83    9.78 
   0   1 -10  119.15    9.91 
   0   1 -10  101.76    8.47 
   0   1 -10  105.65    8.89 
   0  -1 -10  119.72    9.92 
   0   1 -10  107.23    9.05 
   0  -1 -10   92.91    7.83 
   0  -1 -11   91.01   11.98 
   0   1 -11   88.67   11.68 
   0  -1 -11  102.84   13.51 
   0   1 -11   92.95   12.26 
   0   1 -11   75.61   10.08 
   0  -1 -11   96.91   12.73 
   0   1 -11   76.03   10.05 
   0   2   0 1179.69  107.51 
   0  -2   0 1349.67  123.74 
   0  -2   0 1413.40  132.45 
   0   2   0 1093.89   99.66 
   0  -2   0 1378.80  129.35 
   0   2   0 1103.66  100.56 
   0   2   0 1104.97  100.60 
   0  -2   0 1380.81  128.50 
   0  -2   0 1399.81  132.20 
   0  -2   0 1414.68  132.02 
   0  -2   0 1412.55  133.19 
   0   2  -1 1308.72  119.12 
   0   2   1 1277.51  116.55 
   0  -2   1 1379.64  126.10 
   0  -2  -1 1501.16  138.08 
   0  -2   1 1383.97  131.60 
   0  -2  -1 1493.50  140.30 
   0   2   1 1163.22  105.95 
   0   2  -1 1211.22  110.36 
   0  -2  -1 1329.20  122.98 
   0   2  -1 1371.73  124.80 
   0   2   1 1272.01  115.98 
   0   2  -1 1221.85  112.39 
   0  -2  -1 1216.49  110.62 
   0   2  -1 1301.86  119.62 
   0   2   1 1280.87  117.75 
   0  -2   1 1474.38  136.17 
   0  -2  -1 1539.14  141.94 
   0  -2   1 1408.17  132.25 
   0  -2  -1 1618.25  154.53 
   0  -2   1 1500.70  143.19 
   0  -2  -1 1593.14  145.66 
   0  -2   1 1446.14  136.80 
   0  -2  -1 1646.83  151.65 
   0   2  -2 3905.36  355.44 
   0   2   2 3772.62  345.91 
   0  -2   2 3971.60  375.15 
   0  -2  -2 4390.74  402.73 
   0  -2   2 4122.39  394.15 
   0  -2  -2 4696.17  436.20 
   0   2   2 3468.69  315.90 
   0   2  -2 3752.51  342.66 
   0  -2  -2 3745.05  340.61 
   0   2  -2 4186.28  380.53 
   0   2   2 3540.89  321.70 
   0   2  -2 4171.12  380.91 
   0   2  -2 4040.01  366.99 
   0  -2   2 4508.11  439.32 
   0  -2  -2 4396.86  404.13 
   0  -2   2 4194.19  389.25 
   0  -2  -2 5181.90  486.92 
   0  -2   2 3881.19  360.71 
   0  -2  -2 4923.89  452.93 
   0  -2   2 4207.09  389.00 
   0  -2  -2 5145.32  474.17 
   0   2  -3  392.81   35.93 
   0   2   3  390.52   36.07 
   0  -2   3  388.35   36.97 
   0  -2  -3  376.69   35.30 
   0  -2   3  416.30   38.46 
   0  -2  -3  443.95   42.88 
   0   2   3  339.88   30.96 
   0   2  -3  357.61   32.98 
   0  -2  -3  399.36   36.44 
   0   2  -3  411.99   37.57 
   0   2   3  422.57   38.44 
   0   2  -3  422.03   38.41 
   0   2  -3  403.75   36.74 
   0  -2   3  426.69   40.78 
   0  -2  -3  443.11   40.85 
   0  -2   3  374.54   38.85 
   0  -2  -3  587.78   54.95 
   0  -2   3  376.43   35.28 
   0  -2  -3  509.53   46.85 
   0  -2   3  400.80   36.73 
   0  -2  -3  514.67   47.40 
   0  -2  -4  390.64   28.40 
   0   2  -4  385.02   27.28 
   0   2   4  405.12   28.91 
   0  -2   4  397.55   31.50 
   0  -2   4  443.44   31.61 
   0  -2  -4  459.01   38.03 
   0   2   4  354.99   24.61 
   0   2  -4  402.24   28.45 
   0  -2  -4  445.11   30.82 
   0   2  -4  418.67   29.09 
   0   2   4  371.13   25.81 
   0   2  -4  454.33   31.52 
   0  -2   4  492.38   35.89 
   0  -2  -4  389.77   27.49 
   0  -2   4  428.42   30.15 
   0  -2  -4  578.05   45.07 
   0  -2   4  449.71   31.41 
   0  -2  -4  502.53   36.06 
   0  -2   4  423.57   30.01 
   0  -2  -4  514.80   36.13 
   0  -2  -4  464.57   32.27 
   0  -2  -4  447.67   32.32 
   0   2  -4  386.78   27.06 
   0   2  -4  445.86   31.11 
   0  -2  -4  445.17   31.97 
   0   2  -4  427.13   30.17 
   0  -2  -4  507.19   35.85 
   0   2  -4  430.96   29.86 
   0  -2  -4  468.30   32.55 
   0   2  -4  442.49   30.97 
   0  -2  -4  491.97   37.95 
   0   2  -5  349.45   25.07 
   0  -2   5  367.46   27.85 
   0  -2   5  472.64   34.24 
   0  -2  -5  408.89   31.02 
   0   2  -5  360.63   26.47 
   0  -2  -5  397.15   28.64 
   0   2  -5  363.37   26.10 
   0   2   5  376.64   26.77 
   0   2  -5  412.18   29.26 
   0  -2   5  458.34   33.53 
   0  -2  -5  378.98   28.74 
   0  -2   5  432.29   30.89 
   0  -2  -5  425.53   34.15 
   0  -2   5  428.25   30.43 
   0  -2  -5  435.88   32.93 
   0   2   5  375.37   30.67 
   0   2  -5  369.88   26.17 
   0  -2  -5  410.08   30.43 
   0   2  -5  379.23   26.93 
   0  -2  -5  383.36   27.14 
   0   2  -5  381.19   27.26 
   0  -2  -5  420.44   30.07 
   0   2  -5  414.03   29.54 
   0  -2  -5  415.02   32.97 
   0   2  -5  385.37   27.25 
   0  -2  -5  422.92   29.93 
   0   2  -5  386.64   27.33 
   0   2  -5  413.64   29.81 
   0   2  -5  413.36   29.79 
   0  -2  -5  357.75   25.90 
   0  -2  -5  431.02   33.82 
   0   2  -5  413.70   29.43 
   0  -2  -6   48.24    4.94 
   0   2  -6   44.05    4.02 
   0  -2  -6   37.22    3.52 
   0   2  -6   36.78    3.55 
   0   2   6   36.82    3.46 
   0   2  -6   36.85    3.46 
   0  -2   6   41.91    4.23 
   0  -2  -6   42.61    4.02 
   0  -2   6   41.60    3.99 
   0  -2  -6   38.62    3.97 
   0   2   6   37.30    3.87 
   0   2   6   45.49    4.36 
   0   2  -6   39.72    3.58 
   0  -2  -6   42.53    3.96 
   0  -2  -6   42.86    4.24 
   0   2  -6   40.83    3.93 
   0  -2  -6   43.01    3.90 
   0   2  -6   47.71    4.36 
   0  -2  -6   37.76    3.73 
   0   2  -6   44.74    4.19 
   0  -2  -6   44.59    4.23 
   0   2  -6   41.27    3.76 
   0   2  -6   41.56    3.78 
   0  -2  -6   49.27    4.56 
   0   2  -6   40.37    3.67 
   0   2  -6   42.26    3.88 
   0  -2  -6   46.81    4.30 
   0   2  -6   44.49    4.11 
   0  -2  -6   44.35    4.38 
   0   2  -6   42.52    3.95 
   0  -2   7  148.67   12.75 
   0  -2  -7  143.96   12.58 
   0   2  -7  131.37   11.38 
   0   2  -7  130.53   11.21 
   0  -2   7  138.39   12.33 
   0  -2  -7  149.66   12.78 
   0   2   7  139.47   13.19 
   0  -2   7  147.31   12.55 
   0   2   7  130.20   11.89 
   0   2   7  140.77   12.64 
   0  -2  -7  130.12   11.73 
   0  -2  -7  135.23   12.22 
   0   2  -7  145.83   12.44 
   0  -2  -7  150.14   12.78 
   0   2  -7  144.84   12.39 
   0  -2  -7  146.91   12.61 
   0   2  -7  138.47   12.09 
   0  -2  -7  134.71   12.72 
   0   2  -7  140.16   11.91 
   0   2  -7  147.54   12.51 
   0  -2  -7  144.35   12.28 
   0   2  -7  136.72   11.61 
   0   2  -7  148.22   12.66 
   0  -2  -7  150.92   12.80 
   0   2  -7  143.25   12.33 
   0  -2  -7  142.68   12.76 
   0   2  -7  139.82   11.87 
   0   2   8 1042.12   88.69 
   0  -2   8 1078.48  110.80 
   0   2  -8  960.53   76.86 
   0   2  -8 1025.45   81.99 
   0  -2   8 1055.51   86.43 
   0  -2  -8  990.95   81.08 
   0   2   8 1020.24   84.59 
   0   2   8  969.71   79.02 
   0   2   8  981.61   80.76 
   0  -2  -8 1067.00  111.49 
   0   2  -8 1063.65  111.28 
   0  -2  -8 1038.24   84.54 
   0   2  -8 1086.32  112.22 
   0  -2  -8 1115.22  114.60 
   0   2  -8 1126.26  116.64 
   0  -2  -8  973.01   82.85 
   0   2  -8 1114.66  114.94 
   0   2  -8  951.46   89.04 
   0  -2  -8 1123.77  115.23 
   0   2  -8 1001.38   80.61 
   0   2  -8 1183.36  122.72 
   0  -2  -8 1056.56   85.11 
   0   2  -8 1119.57  115.59 
   0  -2   8 1265.52  130.90 
   0  -2  -8 1089.86  114.15 
   0  -2  -9  140.47   11.36 
   0   2  -9  144.80   11.47 
   0  -2  -9  149.88   11.84 
   0   2  -9  144.40   11.60 
   0  -2  -9  140.20   11.17 
   0   2  -9  136.54   11.11 
   0  -2  -9  110.35    8.96 
   0   2  -9  135.96   10.88 
   0  -2  -9  139.66   11.55 
   0   2  -9  134.88   10.90 
   0   2  -9  136.78   11.13 
   0  -2  -9  145.12   11.56 
   0   2  -9  137.10   11.00 
   0  -2  -9  128.39   10.39 
   0  -2 -10  100.80    8.47 
   0   2 -10  102.20    8.53 
   0  -2 -10  108.50    9.02 
   0   2 -10  102.21    8.61 
   0   2 -10  101.83    8.52 
   0  -2 -10   90.78    7.65 
   0   2 -10   94.69    7.96 
   0   2 -10  102.56    8.62 
   0  -2 -10   97.47    8.41 
   0   2 -10  103.78    8.67 
   0  -2 -10   90.87    7.69 
   0  -2 -11   33.45    4.31 
   0   2 -11   35.12    4.51 
   0  -2 -11   37.78    4.85 
   0   2 -11   33.53    4.30 
   0   2 -11   22.41    3.38 
   0   2 -11   35.10    4.51 
   0  -2 -11   25.77    3.66 
   0   3   0   -0.65    1.11 
   0  -3   0    0.25    1.29 
   0  -3   0    0.41    1.28 
   0   3   0   -0.18    0.96 
   0  -3   0   -0.27    0.86 
   0   3   0   -0.13    0.81 
   0   3   0    0.28    0.76 
   0  -3   0    0.09    1.24 
   0  -3   0   -0.47    1.27 
   0  -3   0   -0.10    0.86 
   0  -3   0    0.53    0.99 
   0   3  -1 2381.10  217.34 
   0   3   1 2477.50  229.77 
   0  -3   1 2510.50  236.03 
   0  -3  -1 2689.77  252.60 
   0  -3   1 2424.22  233.80 
   0  -3  -1 2593.34  252.24 
   0   3   1 2259.68  205.90 
   0   3  -1 2453.20  223.48 
   0  -3  -1 2458.41  224.93 
   0   3   1 2383.35  217.34 
   0   3  -1 2295.74  209.55 
   0   3  -1 2489.43  226.94 
   0   3   1 2410.82  219.05 
   0  -3   1 2546.95  244.16 
   0  -3  -1 2663.05  261.54 
   0  -3   1 2393.53  244.28 
   0  -3  -1 2624.89  261.19 
   0  -3   1 2467.58  249.51 
   0  -3  -1 2621.88  274.33 
   0  -3   1 2340.29  227.23 
   0  -3  -1 2785.72  274.75 
   0   3  -2  785.17   71.95 
   0   3   2  811.99   75.36 
   0  -3   2  807.03   76.00 
   0  -3  -2  859.61   81.43 
   0  -3   2  813.36   77.50 
   0  -3  -2  853.58   87.85 
   0   3   2  661.49   62.68 
   0   3  -2  653.57   63.93 
   0  -3  -2  760.81   69.46 
   0   3  -2  806.48   73.99 
   0   3   2  742.64   71.99 
   0   3  -2  698.82   63.65 
   0   3  -2  743.87   69.84 
   0  -3   2  846.78   80.80 
   0  -3  -2  861.05   83.56 
   0  -3   2  801.33   77.00 
   0  -3  -2  859.34   86.89 
   0  -3   2  821.30   76.85 
   0  -3  -2  879.46   86.33 
   0  -3   2  684.94   63.89 
   0  -3  -2  919.72   90.73 
   0   3  -3 1115.74   78.23 
   0   3   3 1194.91   88.22 
   0  -3   3 1144.79   83.60 
   0  -3  -3 1245.93   96.00 
   0  -3   3 1149.21   90.21 
   0  -3  -3 1304.31  101.36 
   0   3   3 1030.17   73.37 
   0   3  -3 1104.58   79.15 
   0  -3  -3 1110.77   78.51 
   0   3  -3 1186.71   84.23 
   0   3   3 1118.97   81.39 
   0   3  -3 1175.72   81.55 
   0   3  -3 1193.62   82.57 
   0  -3   3 1203.17   89.42 
   0  -3  -3 1182.67   86.69 
   0  -3   3 1170.12   93.09 
   0  -3  -3 1297.58  111.21 
   0  -3   3 1151.47   83.58 
   0  -3  -3 1344.17  104.91 
   0  -3  -3 1325.95  101.51 
   0   3  -3  967.43   67.18 
   0  -3   3 1261.93   93.00 
   0   3  -3 1082.72   75.88 
   0  -3  -3 1147.27   86.73 
   0  -3  -3 1315.03   92.72 
   0   3  -3 1050.12   72.71 
   0  -3  -3 1243.25   90.94 
   0   3  -3 1056.65   73.05 
   0   3  -3 1173.34   81.83 
   0  -3  -3 1210.63   84.13 
   0  -3  -3 1291.13   98.66 
   0  -3  -4   45.04    3.70 
   0   3  -4   47.85    3.52 
   0   3   4   49.21    3.84 
   0  -3   4   45.67    3.84 
   0  -3   4   58.57    4.98 
   0  -3  -4   56.87    4.55 
   0   3   4   54.52    3.97 
   0   3  -4   55.62    4.15 
   0   3  -4   55.76    4.15 
   0   3   4   54.29    3.98 
   0   3  -4   50.31    3.82 
   0  -3   4   61.81    4.83 
   0  -3  -4   57.05    4.63 
   0  -3   4   57.92    4.71 
   0  -3  -4   62.37    4.95 
   0  -3  -4   64.62    5.19 
   0  -3  -4   63.99    5.36 
   0   3  -4   49.56    3.54 
   0  -3  -4   57.51    4.71 
   0  -3  -4   60.61    4.59 
   0   3  -4   57.49    4.14 
   0  -3  -4   56.86    4.63 
   0   3  -4   59.51    4.33 
   0   3  -4   58.20    4.16 
   0   3  -4   61.08    4.41 
   0  -3  -4   69.13    5.03 
   0   3  -4   60.13    4.30 
   0   3  -4   67.46    4.89 
   0   3  -4   63.49    4.60 
   0  -3   4   57.27    4.21 
   0   3  -5  607.42   54.99 
   0  -3   5  642.24   61.54 
   0  -3  -5  748.00   69.91 
   0   3  -5  745.84   66.70 
   0   3  -5  682.32   61.66 
   0   3   5  694.84   62.20 
   0   3  -5  679.14   60.96 
   0  -3   5  729.28   67.05 
   0  -3  -5  687.64   63.60 
   0  -3   5  652.80   59.84 
   0  -3  -5  743.85   70.28 
   0  -3  -5  573.48   59.02 
   0   3   5  667.01   64.71 
   0   3  -5  692.31   62.15 
   0  -3  -5  763.47   69.70 
   0  -3  -5  760.97   70.71 
   0   3  -5  731.25   66.32 
   0   3  -5  712.24   64.33 
   0  -3  -5  685.25   64.64 
   0   3  -5  740.96   66.67 
   0  -3  -5  803.31   73.60 
   0   3  -5  668.44   60.74 
   0   3  -5  754.03   67.49 
   0  -3  -5  769.45   70.08 
   0   3  -5  753.43   67.93 
   0  -3  -5  711.52   65.63 
   0   3  -5  749.79   67.60 
   0  -3  -5  695.15   64.91 
   0  -3   5  617.21   56.36 
   0  -3  -5  736.90   69.13 
   0  -3   6  102.78    8.04 
   0  -3  -6   94.19    7.36 
   0   3  -6   93.63    6.92 
   0   3  -6  100.61    7.42 
   0   3   6  101.33    7.38 
   0   3  -6  102.13    7.39 
   0  -3   6  111.02    8.73 
   0  -3  -6   99.26    7.59 
   0  -3   6   81.92    6.86 
   0  -3  -6  106.14    8.19 
   0  -3  -6  106.72    8.77 
   0   3   6  102.48    7.88 
   0   3  -6   98.88    7.52 
   0  -3  -6  118.48    8.64 
   0  -3  -6  109.64    8.65 
   0   3  -6  113.77    8.36 
   0   3  -6   95.31    6.95 
   0  -3  -6   96.91    8.11 
   0   3  -6  106.71    7.97 
   0  -3  -6  119.23    9.01 
   0   3  -6  111.18    8.08 
   0   3  -6   94.90    8.47 
   0  -3  -6  115.45    8.36 
   0   3  -6  108.67    7.81 
   0   3  -6  116.29    8.49 
   0  -3  -6  104.76    8.06 
   0   3  -6  112.99    8.37 
   0  -3  -6  123.37    8.86 
   0  -3  -6  117.03    9.18 
   0  -3   7  155.72   16.66 
   0  -3  -7  155.16   16.71 
   0   3  -7  160.74   17.07 
   0   3   7  144.75   15.41 
   0   3  -7  162.66   17.16 
   0  -3   7  160.44   17.46 
   0  -3  -7  171.71   18.24 
   0  -3  -7  144.89   15.89 
   0   3   7  151.86   16.44 
   0   3   7  168.52   18.33 
   0   3  -7  154.54   16.26 
   0  -3  -7  168.22   17.82 
   0  -3  -7  170.36   18.34 
   0   3  -7  186.23   19.67 
   0   3  -7  148.46   15.79 
   0  -3  -7  177.20   18.72 
   0   3  -7  188.01   19.88 
   0  -3  -7  161.94   18.17 
   0   3  -7  172.34   18.15 
   0   3  -7  186.48   19.61 
   0  -3  -7  163.60   17.23 
   0   3  -7  168.50   17.76 
   0   3  -7  173.72   18.42 
   0  -3  -7  173.37   18.81 
   0   3  -7  170.25   18.10 
   0  -3  -7  170.65   18.43 
   0  -3  -8    2.97    1.04 
   0  -3  -8    2.88    1.14 
   0   3  -8    3.30    0.98 
   0  -3  -8    3.20    1.09 
   0   3  -8    3.84    1.44 
   0  -3  -8    2.47    1.18 
   0   3  -8    2.75    0.99 
   0   3  -8    2.63    0.91 
   0  -3  -8    2.84    1.27 
   0   3  -8    3.67    0.96 
   0   3  -8    3.19    1.03 
   0  -3  -8    3.68    0.92 
   0   3  -8    3.75    1.33 
   0  -3  -8    4.55    1.54 
   0  -3   9   40.28    3.69 
   0  -3  -9   37.42    3.37 
   0   3  -9   37.31    3.29 
   0  -3  -9   38.96    3.54 
   0   3  -9   33.46    3.11 
   0  -3  -9   31.54    2.95 
   0   3  -9   36.11    3.29 
   0   3  -9   40.91    3.53 
   0  -3  -9   34.30    3.21 
   0   3  -9   36.60    3.30 
   0   3  -9   17.52    4.52 
   0  -3  -9   40.33    3.51 
   0   3  -9   46.25    4.13 
   0  -3  -9   35.52    3.52 
   0  -3 -10   16.48    1.40 
   0   3 -10   13.84    1.21 
   0  -3 -10   19.97    1.68 
   0   3 -10   19.76    1.76 
   0   3 -10   16.43    1.46 
   0  -3 -10   14.51    1.43 
   0   3 -10   15.61    1.29 
   0   3 -10   16.97    1.43 
   0  -3 -10   17.70    1.49 
   0   3 -10   16.88    1.58 
   0  -3 -10   14.63    1.40 
   0   4   0  189.60   13.81 
   0  -4   0  192.94   15.59 
   0  -4   0  175.47   13.95 
   0   4   0  161.19   11.43 
   0  -4   0  175.15   12.65 
   0   4   0  143.84   10.05 
   0   4   0  178.39   12.50 
   0  -4   0  173.60   12.98 
   0  -4   0  177.33   14.72 
   0  -4   0  177.34   15.43 
   0  -4   0  173.02   14.15 
   0   4   0  176.61   12.71 
   0   4   0  161.58   11.24 
   0  -4   0  180.48   13.55 
   0  -4   0  168.85   12.06 
   0  -4   0  203.74   14.16 
   0  -4   0  167.41   12.31 
   0   4  -1  746.90   52.76 
   0   4   1  669.37   48.58 
   0  -4   1  724.03   55.62 
   0  -4  -1  725.90   57.78 
   0  -4   1  651.95   51.59 
   0  -4  -1  678.74   57.83 
   0   4   1  614.62   43.74 
   0   4  -1  630.79   43.90 
   0  -4   1  651.79   48.91 
   0   4   1  693.46   48.23 
   0   4  -1  620.72   44.65 
   0   4  -1  710.99   49.35 
   0  -4   1  682.00   51.84 
   0  -4  -1  723.03   53.12 
   0  -4   1  677.72   52.11 
   0  -4  -1  670.62   54.89 
   0  -4   1  626.19   46.27 
   0  -4   1  600.71   45.41 
   0  -4  -1  644.59   51.17 
   0   4   1  647.08   46.61 
   0   4   1  641.14   44.40 
   0   4  -1  652.73   45.21 
   0  -4  -1  606.05   49.12 
   0  -4   1  688.73   51.16 
   0  -4  -1  689.65   52.69 
   0   4   1  581.83   41.71 
   0   4  -1  696.44   48.20 
   0  -4   1  677.36   48.74 
   0  -4  -1  681.26   48.46 
   0   4  -1  479.28   38.14 
   0  -4  -1  762.30   53.54 
   0  -4  -1  689.74   51.13 
   0   4  -2 2381.21  172.31 
   0   4   2 2287.35  168.59 
   0  -4   2 2341.66  179.19 
   0  -4  -2 2454.31  191.47 
   0  -4   2 2284.65  192.47 
   0  -4  -2 2395.42  187.54 
   0   4   2 1871.30  143.05 
   0   4  -2 1987.74  159.27 
   0  -4   2 2457.37  183.50 
   0   4   2 2160.60  162.38 
   0   4  -2 2477.93  175.69 
   0   4  -2 2280.06  162.04 
   0  -4   2 2424.33  182.59 
   0  -4  -2 2479.62  185.49 
   0  -4   2 2245.54  184.50 
   0  -4  -2 2436.35  193.81 
   0  -4   2 2157.85  158.87 
   0  -4  -2 2432.11  210.28 
   0  -4  -2 2421.63  197.68 
   0   4   2 2209.52  160.28 
   0  -4   2 1631.61  188.71 
   0   4   2 1855.59  133.57 
   0  -4  -2 2271.12  191.65 
   0  -4   2 1514.90  184.98 
   0  -4  -2 2338.03  182.20 
   0   4  -2 2053.92  145.83 
   0  -4  -2 2363.69  179.22 
   0   4   2 2139.73  151.31 
   0   4  -2 2066.65  146.50 
   0   4  -2 2446.67  172.63 
   0  -4  -2 2328.42  171.35 
   0   4  -2 2145.29  151.78 
   0   4  -2 2351.32  168.31 
   0  -4   2 2028.76  148.04 
   0  -4  -2 2465.93  186.67 
   0   4  -3    7.73    0.98 
   0   4   3    5.26    0.88 
   0  -4   3    4.64    1.23 
   0  -4  -3    6.69    1.21 
   0  -4   3    5.53    1.04 
   0  -4  -3    4.78    1.03 
   0   4   3    6.24    0.85 
   0   4  -3    5.88    0.87 
   0   4  -3    5.62    0.95 
   0   4   3    7.13    1.00 
   0   4  -3   10.53    1.19 
   0  -4   3    7.20    1.93 
   0  -4  -3    7.00    1.18 
   0  -4   3    5.54    0.96 
   0  -4  -3    4.86    1.60 
   0  -4  -3    6.12    1.23 
   0  -4  -3    6.40    1.15 
   0   4  -3   10.04    0.96 
   0   4   3    7.25    0.66 
   0  -4   3    5.82    0.81 
   0   4  -3    5.94    0.65 
   0  -4  -3    6.23    0.88 
   0  -4   3    6.99    0.90 
   0  -4  -3    6.62    1.09 
   0   4  -3    6.37    0.74 
   0  -4   3    6.92    1.24 
   0  -4  -3    5.75    0.90 
   0  -4  -3    5.38    0.88 
   0   4   3    9.40    0.84 
   0   4  -3    6.51    0.67 
   0   4  -3    5.55    0.68 
   0   4  -3    6.24    0.79 
   0  -4  -3    8.23    0.94 
   0   4  -3    9.12    0.83 
   0   4  -3    6.07    0.63 
   0   4  -3    7.23    0.83 
   0  -4  -3    6.91    0.86 
   0  -4   3    6.27    0.74 
   0  -4  -3    7.74    1.14 
   0   4  -4  155.60   14.18 
   0   4   4  142.79   13.02 
   0  -4   4  144.16   14.08 
   0  -4  -4  141.10   13.06 
   0  -4  -4  172.87   15.92 
   0   4   4  145.79   13.12 
   0   4  -4  157.82   14.19 
   0   4  -4  152.96   13.98 
   0   4   4  136.70   13.10 
   0   4  -4  166.36   14.97 
   0  -4   4  181.33   17.35 
   0  -4  -4  156.15   14.42 
   0  -4   4  148.30   14.22 
   0  -4  -4  172.83   16.64 
   0  -4  -4  167.29   16.01 
   0  -4  -4  167.60   16.20 
   0   4  -4  148.20   13.42 
   0  -4   4  126.82   12.04 
   0   4  -4  140.01   12.96 
   0  -4  -4  152.76   14.15 
   0  -4   4  166.26   15.69 
   0  -4  -4  155.53   15.18 
   0   4  -4  161.22   14.57 
   0  -4  -4  167.84   16.28 
   0   4  -4  165.99   15.08 
   0  -4  -4  178.31   16.78 
   0   4   4  120.50   11.06 
   0   4  -4  159.03   14.26 
   0   4  -4  152.78   13.73 
   0   4  -4  175.96   15.77 
   0  -4  -4  162.23   15.10 
   0   4  -4  153.67   13.86 
   0   4  -4  154.35   14.04 
   0  -4  -4  158.10   14.37 
   0   4  -4  161.74   14.75 
   0  -4  -4  155.54   15.54 
   0  -4  -4  168.52   16.21 
   0   4  -5   49.33    3.70 
   0  -4   5   47.74    3.85 
   0  -4   5   51.49    4.46 
   0  -4  -5   61.23    4.85 
   0   4  -5   50.75    3.80 
   0   4   5   58.96    4.37 
   0   4  -5   52.77    3.99 
   0  -4   5   53.82    4.48 
   0  -4  -5   58.06    4.63 
   0  -4  -5   55.40    4.50 
   0  -4  -5   56.44    5.04 
   0   4   5   61.62    4.90 
   0   4  -5   46.41    3.43 
   0  -4   5   47.87    3.75 
   0   4  -5   48.10    3.88 
   0  -4  -5   61.35    4.58 
   0  -4   5   42.72    4.49 
   0  -4  -5   53.87    4.46 
   0   4  -5   51.87    3.90 
   0  -4  -5   56.76    4.26 
   0   4  -5   58.40    4.33 
   0  -4  -5   57.70    4.73 
   0   4   5   44.98    3.27 
   0   4  -5   53.66    3.95 
   0   4  -5   60.12    4.39 
   0  -4  -5   58.37    4.31 
   0   4  -5   55.27    4.04 
   0   4  -5   47.39    3.71 
   0  -4  -5   59.92    4.58 
   0   4  -5   55.33    4.18 
   0  -4  -5   64.23    4.72 
   0  -4  -5   56.86    4.57 
   0  -4   6  146.24   15.86 
   0  -4  -6  151.41   16.28 
   0   4  -6  141.62   15.09 
   0   4  -6  147.20   15.70 
   0   4   6  180.95   19.07 
   0   4  -6  156.40   16.52 
   0  -4   6  151.06   16.45 
   0  -4  -6  146.21   15.66 
   0  -4  -6  155.24   16.78 
   0  -4  -6  149.91   16.44 
   0   4   6  165.08   17.77 
   0   4  -6  179.56   18.85 
   0  -4  -6  167.71   17.90 
   0  -4   6  168.06   18.22 
   0  -4  -6  160.49   17.25 
   0   4  -6  157.66   16.76 
   0  -4  -6  150.54   16.34 
   0   4  -6  176.63   18.81 
   0  -4  -6  173.61   19.38 
   0   4  -6  161.84   17.05 
   0   4  -6  126.72   13.64 
   0  -4  -6  175.27   18.54 
   0   4  -6  162.26   17.14 
   0   4  -6  161.19   17.07 
   0  -4  -6  141.53   15.35 
   0   4  -6  170.06   18.05 
   0  -4  -6  182.49   19.20 
   0  -4  -6  166.44   18.09 
   0  -4  -7   73.96    7.86 
   0   4  -7   75.52    7.95 
   0   4   7   61.77    6.58 
   0   4  -7   62.75    6.63 
   0  -4   7   73.27    8.05 
   0  -4  -7   62.78    6.86 
   0   4   7   72.20    7.79 
   0   4   7   69.45    7.39 
   0   4  -7   56.77    5.89 
   0  -4  -7   75.96    8.25 
   0  -4   7   53.08    6.55 
   0  -4  -7   75.14    7.97 
   0   4  -7   68.03    7.13 
   0  -4  -7   86.79    9.18 
   0   4  -7   77.06    8.04 
   0  -4  -7   77.47    8.43 
   0   4  -7   71.96    7.45 
   0   4  -7   78.62    8.10 
   0  -4  -7   74.31    7.78 
   0   4  -7   74.16    7.70 
   0   4  -7   84.75   12.21 
   0  -4  -7   69.20    7.32 
   0   4  -7   78.18    8.21 
   0   4   7   58.22    6.07 
   0  -4  -7   72.02    7.82 
   0  -4  -8   53.20    4.38 
   0  -4   8   57.04    4.96 
   0  -4  -8   53.43    4.43 
   0   4  -8   58.18    4.80 
   0  -4  -8   54.36    4.49 
   0   4  -8   53.46    4.42 
   0  -4  -8   51.01    4.34 
   0   4  -8   52.91    4.37 
   0   4  -8   59.48    4.79 
   0  -4  -8   54.14    4.54 
   0   4  -8   54.26    4.37 
   0   4  -8   55.90    4.58 
   0  -4  -8   52.49    4.31 
   0   4  -8   60.67    4.99 
   0  -4  -8   51.35    4.40 
   0   4   9  118.50    9.94 
   0  -4   9  122.80   10.54 
   0  -4  -9  125.00   10.59 
   0   4  -9  125.03   10.47 
   0  -4   9  134.62   12.13 
   0  -4  -9  132.52   11.05 
   0  -4  -9  105.16    9.14 
   0   4  -9  126.15   10.55 
   0   4  -9  143.01   11.85 
   0  -4  -9  117.01    9.77 
   0   4  -9  119.26   10.07 
   0   4  -9  132.48   11.11 
   0   4  -9  121.62   10.28 
   0  -4  -9  117.17   10.07 
   0  -4 -10    9.70    1.53 
   0   4 -10    9.20    1.45 
   0  -4  10    9.48    1.66 
   0  -4 -10    9.48    1.48 
   0   4 -10    8.97    1.41 
   0  -4 -10    7.72    1.39 
   0   4 -10    8.83    1.37 
   0   4 -10    9.08    1.49 
   0   4 -10    9.29    1.52 
   0  -4 -10    6.29    1.42 
   0   5   0    1.03    0.89 
   0  -5   0   -0.29    1.23 
   0  -5   0   -0.15    1.54 
   0   5   0   -0.51    0.86 
   0   5   0    0.13    0.82 
   0  -5   0    1.10    1.19 
   0  -5   0   -0.41    1.19 
   0  -5   0    0.70    0.97 
   0  -5   0   -0.20    0.90 
   0   5   0    0.45    0.83 
   0  -5   0    0.31    1.16 
   0   5   0    0.91    0.75 
   0  -5   0    0.46    0.74 
   0  -5   0   -0.74    1.32 
   0  -5   0   -0.77    1.54 
   0   5   0    0.06    0.77 
   0   5   0   -0.32    0.69 
   0  -5   0    0.75    1.00 
   0   5   0   -0.50    0.73 
   0  -5   0   -0.10    0.91 
   0   5  -1  408.90   37.44 
   0   5   1  538.37   49.30 
   0  -5   1  546.79   51.45 
   0  -5  -1  548.04   53.13 
   0  -5   1  508.17   49.74 
   0  -5  -1  544.97   52.49 
   0   5   1  546.08   48.99 
   0   5  -1  568.20   50.95 
   0   5   1  576.51   51.72 
   0   5  -1  543.40   48.71 
   0   5  -1  499.55   45.90 
   0  -5   1  522.53   48.76 
   0  -5  -1  499.16   49.15 
   0  -5   1  517.45   50.90 
   0  -5  -1  530.95   50.98 
   0  -5  -1  534.47   53.13 
   0  -5  -1  509.25   48.04 
   0   5  -1  478.51   43.89 
   0   5   1  550.33   49.95 
   0  -5   1  601.47   57.23 
   0  -5  -1  576.89   54.08 
   0   5   1  561.06   50.33 
   0   5  -1  547.11   50.16 
   0  -5  -1  628.75   56.65 
   0  -5   1  572.66   53.54 
   0  -5  -1  566.21   52.41 
   0  -5   1  600.27   58.34 
   0  -5  -1  578.38   55.78 
   0  -5  -1  470.81   43.21 
   0   5   1  568.72   51.06 
   0   5  -1  570.83   51.14 
   0   5  -1  341.80   60.15 
   0  -5  -1  492.62   44.83 
   0  -5   1  599.75   54.94 
   0  -5  -1  491.75   49.42 
   0   5  -1  400.37   59.12 
   0  -5   1  526.92   48.04 
   0  -5  -1  579.93   54.39 
   0   5  -2  223.53   20.60 
   0  -5   2  229.72   16.81 
   0  -5  -2  225.29   20.80 
   0  -5   2  214.26   15.74 
   0  -5  -2  220.28   21.14 
   0   5   2  214.80   13.56 
   0   5  -2  190.62   18.53 
   0   5   2  210.09   14.07 
   0   5  -2  223.85   14.07 
   0  -5   2  213.40   19.66 
   0  -5  -2  238.77   22.35 
   0  -5   2  208.73   14.45 
   0  -5  -2  242.12   23.07 
   0  -5  -2  208.49   15.05 
   0  -5  -2  211.78   20.12 
   0   5  -2  227.46   20.51 
   0   5   2  237.79   15.62 
   0  -5   2  215.81   20.31 
   0  -5  -2  228.54   16.34 
   0   5  -2  209.03   18.75 
   0  -5  -2  212.46   21.36 
   0  -5   2  218.93   15.18 
   0  -5  -2  228.22   15.84 
   0   5  -2  197.12   17.73 
   0  -5   2  227.41   20.95 
   0  -5  -2  217.83   21.14 
   0  -5  -2  208.20   19.43 
   0   5   2  201.44   18.06 
   0   5  -2  190.80   17.63 
   0   5  -2  223.41   20.55 
   0  -5  -2  203.77   18.67 
   0   5  -2  204.44   18.36 
   0  -5   2  226.43   15.00 
   0  -5  -2  175.36   22.08 
   0   5  -2  139.80   15.87 
   0  -5  -2  218.13   18.16 
   0  -5   2  195.87   17.87 
   0  -5  -2  229.42   15.91 
   0   5  -3   59.31    4.51 
   0   5   3   63.99    4.88 
   0  -5   3   56.71    4.91 
   0  -5  -3   58.76    4.75 
   0  -5   3   51.58    4.18 
   0  -5  -3   67.58    5.46 
   0   5   3   53.31    3.97 
   0   5  -3   60.48    4.49 
   0  -5   3   61.96    4.82 
   0   5   3   63.68    4.78 
   0   5  -3   56.09    4.20 
   0  -5   3   57.27    4.64 
   0  -5  -3   59.16    4.74 
   0  -5   3   47.48    3.98 
   0  -5  -3   59.27    4.82 
   0  -5  -3   55.38    4.53 
   0   5  -3   57.18    4.17 
   0   5   3   56.46    4.15 
   0  -5   3   55.45    4.65 
   0  -5  -3   53.46    4.12 
   0  -5  -3   59.60    4.43 
   0  -5   3   54.20    4.18 
   0  -5  -3   57.21    4.46 
   0   5  -3   48.84    3.59 
   0  -5   3   54.29    4.53 
   0  -5  -3   57.27    4.80 
   0  -5  -3   53.51    4.58 
   0   5   3   41.68    3.15 
   0   5  -3   55.06    3.99 
   0   5  -3   51.32    3.80 
   0   5  -3   57.70    4.24 
   0  -5  -3   52.41    4.00 
   0   5  -3   52.96    3.88 
   0  -5  -3   56.30    4.28 
   0   5  -3   55.10    4.16 
   0  -5  -3   60.06    4.60 
   0  -5  -3   54.63    4.49 
   0   5  -4  427.93   36.56 
   0  -5   4  439.31   40.30 
   0  -5   4  457.24   40.78 
   0  -5  -4  470.91   41.16 
   0   5  -4  409.18   36.36 
   0  -5   4  464.84   40.69 
   0   5   4  482.05   40.77 
   0   5  -4  469.71   40.23 
   0  -5   4  490.53   43.84 
   0  -5  -4  478.21   40.95 
   0  -5  -4  468.13   42.23 
   0  -5  -4  471.84   42.11 
   0   5   4  438.57   38.85 
   0   5  -4  456.97   39.06 
   0  -5   4  457.69   39.86 
   0   5  -4  466.72   40.82 
   0  -5  -4  437.05   37.64 
   0  -5   4  503.07   45.06 
   0  -5  -4  518.37   47.62 
   0   5  -4  474.77   40.37 
   0  -5   4  553.61   49.82 
   0  -5  -4  511.95   45.66 
   0  -5  -4  510.24   44.90 
   0   5   4  460.23   38.89 
   0   5  -4  456.17   41.54 
   0   5  -4  485.51   41.76 
   0   5  -4  494.92   41.77 
   0  -5  -4  489.96   42.12 
   0   5  -4  505.77   42.79 
   0   5  -4  338.73   31.43 
   0  -5  -4  504.51   43.09 
   0   5  -4  488.75   42.08 
   0  -5  -4  538.50   46.53 
   0  -5  -4  508.92   46.48 
   0   5  -5  499.23   40.64 
   0  -5   5  487.58   40.68 
   0  -5   5  504.77   42.49 
   0  -5  -5  526.14   44.23 
   0   5  -5  523.40   43.29 
   0  -5   5  539.18   44.86 
   0   5   5  542.93   43.95 
   0  -5   5  542.04   45.25 
   0  -5  -5  518.66   42.43 
   0  -5  -5  505.33   42.14 
   0  -5  -5  515.01   43.62 
   0   5   5  535.68   44.74 
   0   5  -5  521.17   42.60 
   0  -5   5  517.86   44.00 
   0   5  -5  564.64   46.07 
   0  -5  -5  628.39   51.40 
   0  -5   5  530.82   45.42 
   0  -5  -5  563.02   47.53 
   0   5  -5  572.18   47.25 
   0  -5   5  590.48   50.14 
   0  -5  -5  579.81   48.90 
   0  -5  -5  591.87   52.68 
   0   5   5  464.46   37.77 
   0   5  -5  544.17   44.46 
   0   5  -5  583.00   49.75 
   0  -5  -5  557.38   47.22 
   0   5  -5  609.77   49.62 
   0   5  -5  549.38   45.00 
   0  -5  -5  511.41   42.61 
   0   5  -5  574.24   46.91 
   0  -5  -5  634.20   51.46 
   0  -5  -5  544.16   46.51 
   0  -5  -6  204.15   21.14 
   0   5  -6  188.68   19.46 
   0  -5   6  191.50   20.04 
   0   5  -6  181.04   18.90 
   0  -5   6  197.75   20.61 
   0  -5  -6  195.41   20.37 
   0   5   6  183.07   19.32 
   0   5   6  184.95   19.39 
   0   5  -6  230.71   23.68 
   0  -5  -6  220.64   23.12 
   0  -5   6  208.73   22.51 
   0  -5  -6  220.11   23.51 
   0   5  -6  195.85   20.26 
   0  -5   6  229.77   24.57 
   0  -5  -6  224.72   23.42 
   0  -5  -6  222.10   23.75 
   0   5  -6  197.57   20.63 
   0   5  -6  185.10   22.48 
   0  -5  -6  213.52   21.97 
   0   5  -6  201.84   20.83 
   0   5  -6  201.37   20.91 
   0  -5  -6  234.43   24.13 
   0   5  -6  209.70   21.70 
   0   5   6  171.72   18.67 
   0  -5  -6  201.54   21.40 
   0   5  -7  128.10   10.14 
   0  -5  -7  116.75    9.48 
   0  -5   7  103.52    8.75 
   0  -5  -7  112.83    9.20 
   0   5  -7  107.83    8.66 
   0  -5   7  111.68    9.91 
   0  -5  -7  119.37    9.61 
   0  -5  -7  112.01    9.59 
   0   5  -7  115.93    9.47 
   0   5  -7  120.34    9.53 
   0  -5  -7  112.68    9.07 
   0   5  -7  115.84    9.30 
   0  -5  -7  114.60    9.18 
   0   5  -7  112.97    9.10 
   0   5   7   96.93    7.81 
   0  -5  -7  111.66    9.22 
   0  -5  -8   91.47    7.97 
   0  -5   8   83.15    7.25 
   0  -5  -8   87.02    7.43 
   0   5  -8   85.74    7.18 
   0  -5   8   87.86    8.09 
   0  -5  -8   91.80    7.66 
   0  -5  -8   85.36    7.48 
   0   5  -8   89.23    7.55 
   0   5  -8  100.71    8.36 
   0  -5  -8   90.21    7.56 
   0   5  -8   91.05    7.74 
   0   5  -8   88.33    7.42 
   0   5  -8   84.06    7.10 
   0  -5  -8   81.22    7.06 
   0   5   9   84.48   11.27 
   0  -5  -9   98.59   13.03 
   0   5  -9   97.45   12.82 
   0  -5   9   71.68    9.89 
   0  -5  -9   98.26   13.01 
   0  -5  -9   91.58   12.18 
   0   5  -9   98.54   12.99 
   0   5  -9  117.24   15.39 
   0  -5  -9   99.39   13.17 
   0   5  -9   80.50   10.69 
   0   5  -9   97.41   12.86 
   0  -5  -9   97.62   12.91 
   0   6   0  183.10   13.43 
   0  -6   0  190.59   15.25 
   0  -6   0  173.40   13.20 
   0   6   0  180.05   13.14 
   0   6   0  181.68   13.10 
   0  -6   0  172.53   12.86 
   0  -6   0  164.35   12.32 
   0   6   0  186.12   13.93 
   0  -6   0  193.50   15.44 
   0  -6   0  179.81   14.04 
   0  -6   0  175.35   13.34 
   0   6   0  177.86   12.79 
   0  -6   0  172.27   12.72 
   0   6   0  125.74   14.14 
   0  -6   0  167.90   12.75 
   0   6  -1  170.84   12.61 
   0   6   1  174.16   12.98 
   0  -6   1  149.07   11.65 
   0  -6  -1  124.14   16.06 
   0  -6  -1  154.92   12.59 
   0   6   1  176.11   12.72 
   0   6  -1  165.71   12.57 
   0   6   1  171.20   12.39 
   0  -6   1  166.21   12.33 
   0  -6  -1  157.64   11.68 
   0  -6   1  154.41   11.77 
   0  -6  -1  161.34   12.13 
   0   6  -1  173.05   12.85 
   0   6   1  181.13   13.55 
   0  -6   1  166.53   13.23 
   0  -6  -1  187.90   14.70 
   0   6   1  130.11   12.85 
   0   6  -1  183.40   13.19 
   0  -6  -1  155.65   13.41 
   0  -6   1  164.89   13.27 
   0  -6  -1  172.09   13.47 
   0  -6   1  182.28   14.61 
   0  -6  -1  173.22   13.33 
   0   6   1  175.31   12.65 
   0   6  -1  173.17   12.78 
   0  -6   1  171.05   12.86 
   0  -6  -1  169.46   12.51 
   0   6   1  171.20   12.36 
   0   6  -1  163.14   12.36 
   0  -6   1  158.44   11.89 
   0  -6  -1  166.97   12.50 
   0   6  -2  966.04   79.07 
   0   6   2 1140.06   93.76 
   0  -6   2  962.24   81.04 
   0  -6  -2  925.63  100.84 
   0  -6   2  934.52  100.51 
   0  -6  -2  984.04   84.33 
   0   6   2  889.22   94.51 
   0   6  -2  986.37   80.31 
   0   6   2  922.23  100.73 
   0  -6   2  900.02   95.37 
   0  -6  -2  973.17   79.45 
   0  -6  -2  952.98  102.71 
   0  -6  -2  896.26   96.01 
   0   6   2  737.87   80.38 
   0   6  -2 1068.52   88.30 
   0   6   2 1065.81   87.87 
   0  -6   2 1035.65   91.70 
   0  -6  -2  997.22   86.60 
   0   6   2  942.33  100.03 
   0   6  -2 1092.63   88.43 
   0  -6  -2 1090.66   89.80 
   0  -6   2 1067.62   89.80 
   0  -6  -2 1043.11   90.76 
   0  -6   2 1061.22   91.91 
   0  -6  -2 1019.01   88.58 
   0  -6  -2  885.64   96.80 
   0   6   2  977.26   79.14 
   0   6  -2  786.19  108.36 
   0   6  -2  608.45  125.69 
   0  -6  -2  896.99   95.44 
   0  -6   2  956.98  103.96 
   0  -6  -2 1023.78   84.26 
   0   6   2  912.45   98.28 
   0   6  -2  946.60  100.64 
   0  -6  -2  958.08  104.14 
   0   6  -3  481.90   39.36 
   0   6   3  479.06   39.37 
   0  -6   3  474.43   40.95 
   0  -6  -3  409.26   37.33 
   0  -6   3  460.04   38.19 
   0  -6  -3  485.75   40.15 
   0   6  -3  548.69   48.80 
   0   6   3  548.30   44.42 
   0  -6   3  478.24   39.81 
   0  -6  -3  487.52   40.72 
   0  -6  -3  455.03   38.29 
   0   6   3  448.30   37.10 
   0   6  -3  539.52   44.34 
   0   6   3  519.29   42.64 
   0  -6   3  513.12   43.46 
   0  -6  -3  494.91   41.10 
   0   6  -3  546.20   45.04 
   0  -6  -3  558.94   47.87 
   0  -6   3  529.28   45.83 
   0  -6  -3  542.71   47.57 
   0  -6   3  567.55   48.20 
   0  -6  -3  542.02   45.11 
   0  -6  -3  492.30   42.77 
   0   6   3  532.19   43.05 
   0   6  -3  516.30   42.98 
   0   6  -3  562.97   47.21 
   0  -6  -3  487.87   41.32 
   0   6  -3  524.78   42.93 
   0  -6   3  537.96   45.38 
   0  -6  -3  527.86   43.13 
   0   6   3  539.01   44.39 
   0  -6  -3  502.28   42.28 
   0   6  -4  330.63   26.47 
   0  -6   4  319.40   26.02 
   0  -6   4  315.31   25.64 
   0  -6  -4  351.85   28.53 
   0   6  -4  338.46   27.10 
   0   6   4  350.25   29.97 
   0  -6   4  338.80   27.73 
   0  -6  -4  336.29   27.29 
   0  -6  -4  309.35   25.72 
   0   6   4  305.70   24.85 
   0   6  -4  355.88   28.85 
   0  -6   4  353.02   30.03 
   0   6  -4  343.28   27.83 
   0  -6  -4  340.45   31.74 
   0  -6   4  356.70   29.79 
   0  -6  -4  361.23   29.99 
   0   6  -4  302.73   24.50 
   0  -6   4  339.31   29.91 
   0  -6  -4  371.68   30.87 
   0  -6  -4  359.34   31.12 
   0   6   4  318.86   25.50 
   0   6  -4  342.84   27.70 
   0   6  -4  328.20   26.40 
   0   6  -4  386.16   31.03 
   0  -6  -4  329.52   26.88 
   0   6  -4  341.22   27.45 
   0  -6   4  368.93   31.02 
   0  -6  -4  340.88   27.21 
   0  -6  -4  333.99   27.58 
   0   6  -5  218.16   14.83 
   0  -6   5  219.47   15.70 
   0   6  -5  232.51   19.41 
   0  -6  -5  223.58   16.94 
   0  -6   5  221.49   15.95 
   0  -6  -5  227.29   15.82 
   0   6  -5  208.20   14.03 
   0  -6   5  241.71   17.28 
   0  -6  -5  231.80   15.89 
   0  -6  -5  211.68   15.30 
   0   6   5  205.19   13.74 
   0   6  -5  212.54   14.45 
   0   6  -5  274.83   18.37 
   0  -6  -5  214.19   14.66 
   0   6  -5  222.94   15.40 
   0  -6   5  235.11   16.33 
   0  -6  -5  210.34   15.03 
   0   6  -6   37.73    3.27 
   0   6  -6   33.14    2.87 
   0  -6  -6   39.21    3.42 
   0  -6   6   40.13    3.49 
   0  -6  -6   41.24    3.47 
   0   6  -6   34.32    3.05 
   0  -6   6   40.85    3.71 
   0  -6  -6   43.74    3.63 
   0  -6  -6   39.32    3.48 
   0   6  -6   39.17    3.21 
   0   6  -6   43.39    3.53 
   0  -6  -6   38.69    3.30 
   0  -6   6   38.32    3.67 
   0   6   6   34.97    2.93 
   0  -6  -6   39.65    3.51 
   0   6  -7  151.57   12.65 
   0  -6  -7  167.37   14.00 
   0  -6   7  124.15   11.22 
   0  -6  -7  140.63   11.87 
   0   6  -7  143.08   11.87 
   0  -6   7  155.69   13.77 
   0  -6  -7  158.23   13.16 
   0  -6  -7  138.84   12.28 
   0   6  -7  145.82   12.25 
   0   6  -7  180.60   14.93 
   0  -6  -7  137.85   11.52 
   0   6  -7  148.54   12.38 
   0  -6   7  163.50   13.95 
   0   6   7  146.79   12.19 
   0  -6  -7  150.53   12.78 
   0   6   8   95.80   12.71 
   0  -6  -8  110.08   14.52 
   0   6  -8   94.02   12.38 
   0  -6   8   55.79    7.92 
   0  -6  -8  106.21   13.99 
   0  -6  -8   95.45   12.63 
   0   6  -8  127.92   16.80 
   0  -6  -8   93.87   12.38 
   0   6  -8   99.84   13.18 
   0  -6   8  104.89   13.96 
   0  -6  -8   99.19   13.10 
   0   7   0   -0.56    0.93 
   0  -7   0   -0.64    1.41 
   0   7   0   -0.13    0.88 
   0  -7   0    0.59    1.24 
   0  -7   0    1.12    1.57 
   0   7   0    0.08    0.97 
   0  -7   0    2.97    1.07 
   0   7   0    2.46    0.92 
   0   7  -1  351.60   36.70 
   0   7   1  344.64   35.91 
   0  -7   1  351.71   38.15 
   0  -7  -1  340.62   35.92 
   0   7   1  338.23   34.72 
   0   7  -1  335.37   34.96 
   0   7   1  260.86   27.21 
   0  -7   1  321.12   33.98 
   0  -7  -1  331.52   35.14 
   0  -7   1  342.50   36.03 
   0  -7  -1  331.57   35.03 
   0   7   1  282.60   36.71 
   0   7  -1  315.06   33.42 
   0  -7   1  323.18   33.71 
   0  -7  -1  304.17   31.54 
   0   7   1  338.60   35.38 
   0   7  -1  354.32   36.39 
   0  -7  -1  290.69   30.81 
   0   7  -2   40.52    2.87 
   0   7   2   40.98    2.92 
   0  -7   2   41.23    3.09 
   0  -7  -2   42.61    3.17 
   0   7  -2   32.47    3.59 
   0  -7   2   40.15    3.14 
   0  -7  -2   38.12    3.14 
   0  -7   2   42.97    3.33 
   0  -7  -2   39.79    3.03 
   0   7   2   38.91    2.71 
   0   7  -2   39.13    2.78 
   0   7  -2   44.09    3.04 
   0  -7   2   39.56    2.96 
   0  -7  -2   36.93    2.69 
   0   7   2   42.17    3.10 
   0  -7  -2   35.44    2.66 
   0   7  -3   14.80    1.55 
   0   7   3   16.55    1.41 
   0  -7   3   13.32    2.28 
   0  -7  -3   14.06    1.32 
   0   7  -3   16.11    1.42 
   0  -7  -3   12.26    1.38 
   0  -7  -3   13.89    1.52 
   0  -7   3   13.45    1.72 
   0  -7  -3   13.02    1.40 
   0  -7  -3   10.56    1.06 
   0   7   3   12.89    1.10 
   0   7  -3   13.11    1.09 
   0   7  -3   17.86    1.43 
   0  -7  -3   11.96    1.27 
   0  -7   3   10.56    2.04 
   0   7   3   11.66    1.13 
   0  -7  -3   11.69    1.37 
   0   7  -4   47.91    4.24 
   0  -7   4   44.36    4.22 
   0   7  -4   42.88    4.83 
   0  -7  -4   44.20    4.16 
   0  -7   4   48.82    4.42 
   0  -7  -4   46.32    4.17 
   0  -7   4   49.59    4.61 
   0  -7  -4   45.35    4.11 
   0  -7  -4   41.85    3.89 
   0   7   4   49.13    4.24 
   0   7  -4   48.54    4.17 
   0   7  -4   33.45    5.91 
   0  -7  -4   40.73    3.66 
   0  -7   4   17.25    6.46 
   0   7   4   50.72    4.51 
   0  -7  -4   42.86    3.89 
   0   7  -5   37.68    3.24 
   0  -7   5   34.46    3.17 
   0   7  -5   38.99    3.34 
   0  -7   5   36.01    3.33 
   0  -7  -5   35.91    3.17 
   0  -7   5   39.82    3.63 
   0  -7  -5   38.46    3.32 
   0  -7  -5   33.05    3.10 
   0   7   5   36.09    3.04 
   0   7  -5   34.02    3.78 
   0  -7  -5   29.67    2.66 
   0   7  -5   30.52    2.63 
   0   7   5   33.35    2.88 
   0  -7  -5   33.13    3.08 
   0   7  -6  184.14   13.46 
   0   7   6  175.88   13.14 
   0  -7   6  166.57   12.39 
   0  -7  -6  172.58   12.71 
   0  -7   6  180.88   13.82 
   0  -7  -6  173.85   12.80 
   0  -7  -6  157.19   11.92 
   0   7  -6  215.56   15.69 
   0  -7  -6  156.03   11.57 
   0  -7   6  155.65   11.96 
   0   7   6  170.81   13.16 
   0  -7  -6  157.10   11.83 
   0   7  -7   54.03    6.85 
   0   7   7   52.66    6.82 
   0  -7  -7   59.90    7.65 
   0  -7   7   31.17    6.79 
   0  -7  -7   50.17    6.41 
   0  -7  -7   48.39    6.24 
   0   7  -7   46.88    7.31 
   0  -7  -7   46.41    6.02 
   0  -7   7   47.24    6.16 
   0   7   7   56.88    7.22 
   0  -7  -7   49.04    6.33 
   0   8   0   50.51    4.35 
   0  -8   0   48.29    4.35 
   0   8   0   40.89    3.83 
   0  -8   0   41.80    3.82 
   0  -8   0   48.57    4.40 
   0   8   0   48.17    4.20 
   0   8   0   50.80    4.25 
   0   8  -1   38.09    3.35 
   0   8   1   38.44    3.32 
   0  -8   1   38.17    3.55 
   0  -8  -1   37.25    3.37 
   0   8  -1   30.36    3.00 
   0   8   1   30.40    2.60 
   0  -8   1   34.45    3.11 
   0  -8  -1   37.37    3.34 
   0  -8   1   30.51    2.86 
   0  -8  -1   33.85    3.23 
   0   8   1   33.56    2.97 
   0   8  -1   37.95    3.26 
   0   8   1   31.83    2.76 
   0   8  -2  131.88   11.09 
   0   8   2  119.64   10.00 
   0  -8   2  128.62   11.09 
   0  -8  -2  126.61   10.68 
   0   8  -2  129.85   10.92 
   0  -8   2  117.21   10.20 
   0  -8  -2  118.79   10.13 
   0  -8   2  121.96   10.58 
   0  -8  -2  119.61   10.17 
   0   8   2   86.77   12.60 
   0   8  -2  123.81   10.41 
   0  -8   2   88.01    7.68 
   0   8   2  112.09   10.47 
   0  -8  -2   94.65    8.02 
   0   8  -3    6.87    1.20 
   0   8   3    6.00    0.76 
   0  -8   3    4.01    1.63 
   0  -8  -3    6.42    1.05 
   0   8  -3    7.12    0.71 
   0   8   3    7.28    0.71 
   0  -8   3    6.47    1.00 
   0  -8  -3    6.32    1.12 
   0  -8   3    6.27    1.25 
   0  -8  -3    6.90    0.98 
   0   8   3    6.75    0.73 
   0   8  -3    3.01    0.94 
   0   8  -3    6.98    0.73 
   0  -8   3    4.18    1.38 
   0   8   3    6.60    0.84 
   0  -8  -3    5.98    0.93 
   0   8  -4  172.72   22.75 
   0   8  -4   85.99   23.16 
   0   8   4  128.15   19.12 
   0  -8   4  123.14   16.57 
   0  -8  -4  164.32   21.77 
   0  -8   4  161.49   21.46 
   0  -8  -4  166.57   21.92 
   0   8   4  167.57   22.08 
   0   8  -4  146.64   19.31 
   0   8  -4  184.11   24.21 
   0  -8   4  153.22   20.20 
   0   8   4  183.63   24.18 
   0  -8  -4  137.36   18.12 
   0   8  -5    4.20    1.02 
   0   8   5    4.43    1.08 
   0  -8  -5    5.23    1.27 
   0  -8   5    5.39    1.54 
   0  -8  -5    5.12    1.09 
   0   8  -5    4.10    1.01 
   0   8   5    4.27    1.14 
   0   9   0    0.42    1.07 
   0  -9   0    1.04    1.37 
   0  -9   0    0.29    1.19 
   0  -9   0   -0.74    1.43 
   0   9   0   -0.05    1.04 
   0   9  -1   82.73   10.51 
   0   9   1   62.09    7.91 
   0  -9   1   72.54    9.28 
   0  -9  -1   69.12    8.84 
   0   9  -1   59.26    7.73 
   0  -9   1   70.06    8.98 
   0  -9  -1   74.03    9.44 
   0   9   1   74.06    9.43 
   0   9  -1   72.87    9.26 
   0   9  -2   40.86    5.22 
   0  -9   2   39.61    5.12 
   0   9  -2   38.99    4.97 
   0  -9  -2   33.00    4.28 
   0  -9   2   38.07    4.92 
   0   9   2   37.32    4.82 
   1   0 -11    4.25    0.88 
   1   0 -11    3.55    0.77 
   1   0 -11    3.84    0.89 
   1   0 -11    3.90    0.84 
   1   0 -10    1.85    1.00 
   1   0 -10    0.44    1.00 
   1   0 -10    0.83    0.89 
   1   0 -10    0.95    1.02 
   1   0 -10    1.86    0.92 
   1   0  -9    3.69    1.08 
   1   0  -9    0.73    0.83 
   1   0  -9    0.03    0.91 
   1   0  -9   -0.12    0.73 
   1   0  -9    0.32    0.89 
   1   0  -9    0.09    0.87 
   1   0  -9    0.83    1.15 
  -1   0   8   18.26    1.68 
   1   0  -8   11.86    1.44 
   1   0  -8   12.29    1.29 
   1   0  -8   14.15    1.72 
  -1   0   8   17.07    1.77 
   1   0  -8   16.86    1.49 
   1   0  -8   15.05    1.25 
   1   0  -8   19.54    1.57 
   1   0  -8   16.16    1.32 
   1   0  -8   15.42    1.23 
   1   0  -8   16.21    1.37 
   1   0  -8   17.63    1.55 
   1   0  -8   18.46    1.76 
  -1   0   7 1984.90  123.92 
   1   0  -7 1881.31  169.21 
   1   0  -7 1818.83  163.72 
   1   0  -7 2003.35  125.52 
  -1   0   7 1837.13  171.88 
  -1   0   7 1772.77  165.04 
  -1   0   7 1560.01  142.38 
   1   0  -7 1942.13  121.04 
   1   0  -7 1893.64  169.76 
   1   0  -7 1994.30  124.15 
   1   0  -7 1810.28  163.01 
   1   0  -7 1773.95  159.84 
   1   0  -7 1871.58  167.87 
   1   0  -7 1948.57  123.79 
   1   0  -7 1628.64  156.28 
   1   0  -6    0.22    0.60 
   1   0  -6   -0.06    0.80 
  -1   0   6   -0.11    0.74 
   1   0  -6    0.27    0.82 
   1   0  -6    2.48    1.09 
  -1   0   6    0.98    0.81 
  -1   0   6    0.79    0.79 
  -1   0   6    0.06    0.73 
   1   0  -6    0.54    0.59 
   1   0  -6    0.80    0.63 
   1   0  -5  531.90   37.16 
   1   0  -5  476.41   33.04 
   1   0  -5  517.64   36.14 
   1   0  -5  482.63   33.52 
   1   0  -5  492.35   34.65 
   1   0  -5  473.19   33.45 
   1   0  -5  534.26   38.72 
   1   0  -4 3025.54  288.15 
   1   0  -4 2472.87  239.01 
   1   0  -4 3005.68  273.36 
   1   0  -4 3077.58  280.33 
   1   0  -4 2711.76  246.97 
   1   0  -4 3083.01  283.26 
   1   0  -4 3566.07  328.46 
   1   0  -4 3412.78  315.75 
   1   0  -4 3151.35  302.44 
   1   0  -3 1621.17  149.09 
   1   0  -3 1441.81  132.25 
   1   0  -3 1443.59  131.35 
   1   0  -3 1548.92  140.79 
   1   0  -3 1337.63  121.77 
   1   0  -3 1511.77  138.33 
   1   0  -3 1860.04  171.78 
   1   0  -3 1618.65  150.43 
   1   0  -3 1788.85  164.11 
  -1   0   1 2973.06  270.89 
  -1   0   1 2794.91  255.29 
   1   0  -1 3769.60  342.75 
   1   0  -1 2925.16  268.57 
  -1   0   1 3633.92  331.38 
   1   0  -1 3181.06  290.23 
   1   0  -1 3634.33  333.12 
  -1   0   1 3359.14  307.19 
  -1   0   1 3231.67  294.82 
   1   0  -1 3566.93  324.04 
   1   0  -1 3497.03  317.68 
  -1   0  -1  197.52   18.01 
   1   0   1  204.01   18.58 
  -1   0  -1  234.87   21.42 
  -1   0  -1  193.44   19.24 
  -1   0  -1  201.66   18.40 
   1   0   1  189.26   17.24 
  -1   0  -1  197.27   17.99 
  -1   0  -1  222.68   20.31 
   1   0   1  250.16   22.78 
   1   0   1  233.03   21.23 
   1   0   1  233.04   21.24 
  -1   0  -2  421.62   38.37 
   1   0   2  439.61   40.06 
  -1   0  -2  553.79   50.38 
   1   0   2  382.26   34.78 
  -1   0  -2  414.42   37.72 
  -1   0  -2  435.25   39.62 
   1   0   2  393.46   35.82 
  -1   0  -2  420.57   38.27 
  -1   0  -2  462.17   42.11 
   1   0   2  546.35   49.71 
   1   0   2  503.76   45.87 
   1   0   2  524.98   47.80 
  -1   0  -3  708.45   64.47 
   1   0   3  797.74   72.63 
  -1   0  -3  792.66   72.23 
  -1   0  -3  739.13   67.17 
  -1   0  -3  809.00   73.59 
   1   0   3  639.13   58.09 
  -1   0  -3  746.59   67.91 
  -1   0  -3  818.03   74.62 
   1   0   3  913.61   83.21 
   1   0   3  832.83   75.82 
   1   0   3  835.67   76.10 
  -1   0  -4   13.47    1.11 
   1   0   4   14.79    1.16 
  -1   0  -4   13.64    1.50 
   1   0   4   14.04    1.11 
  -1   0  -4   16.49    1.38 
  -1   0  -4   18.42    1.71 
   1   0   4   20.04    1.71 
   1   0   4   19.86    1.98 
   1   0   4   25.75    2.22 
  -1   0  -4   21.51    1.71 
  -1   0  -4   18.25    1.41 
  -1   0  -4   21.53    1.79 
  -1   0  -4   23.46    1.79 
   1   0   5  272.24   19.35 
  -1   0  -5  225.80   16.04 
  -1   0  -5  239.67   17.00 
  -1   0  -5  247.09   17.59 
   1   0   5  258.50   18.41 
   1   0   5  260.14   18.45 
   1   0   5  241.07   17.11 
  -1   0  -5  254.92   18.39 
  -1   0  -5  234.15   16.56 
  -1   0  -5  243.24   17.24 
  -1   0  -5  231.90   16.43 
  -1   0  -5  233.21   16.49 
  -1   0  -5  180.93   18.37 
  -1   0  -5  243.31   17.30 
  -1   0  -5  256.02   18.21 
   1   0   6 1704.72  152.67 
  -1   0  -6 1442.53  128.95 
  -1   0  -6 1376.20  123.08 
  -1   0  -6 1461.93  130.85 
   1   0   6 1536.22  137.41 
   1   0   6 1377.22  123.28 
  -1   0  -6 1507.94  134.87 
  -1   0  -6 1453.97  130.15 
  -1   0  -6 1546.23  138.33 
  -1   0  -6 1501.34  134.23 
  -1   0  -6 1373.54  123.37 
  -1   0  -6 1268.92  113.46 
  -1   0  -6 1467.25  131.18 
  -1   0  -6 1497.90  134.11 
  -1   0  -6 1519.27  135.85 
   1   0   7 1272.12  133.54 
  -1   0  -7 1125.48   80.62 
  -1   0  -7 1097.12   78.64 
   1   0   7 1154.28   83.47 
   1   0   7 1157.96   83.07 
   1   0   7 1072.00   76.97 
  -1   0  -7 1113.50   79.91 
  -1   0  -7 1204.85   86.29 
  -1   0  -7 1175.82   84.18 
  -1   0  -7 1123.04   80.49 
  -1   0  -7 1072.36   79.00 
  -1   0  -7 1028.02   73.96 
  -1   0  -7 1247.60   89.33 
  -1   0  -7 1136.84   81.92 
  -1   0  -7 1145.27   83.52 
   1   0   8  221.41   17.69 
  -1   0  -8  178.87   14.35 
  -1   0  -8  200.60   16.02 
   1   0   8  212.17   17.00 
  -1   0  -8  212.06   17.03 
  -1   0  -8  217.04   17.29 
  -1   0  -8  220.61   17.58 
  -1   0  -8  199.97   15.96 
  -1   0  -8  200.65   16.06 
  -1   0  -8  168.63   22.33 
  -1   0  -8  222.23   17.69 
  -1   0  -8  212.29   17.14 
  -1   0  -9  219.96   17.39 
  -1   0  -9  223.36   17.64 
  -1   0  -9  215.22   17.29 
  -1   0  -9  222.09   17.58 
  -1   0  -9  227.62   18.03 
  -1   0  -9  219.81   17.42 
  -1   0 -10   26.16    2.05 
  -1   0 -10   18.02    1.50 
  -1   0 -10   24.45    2.03 
  -1   0 -10   23.96    1.85 
  -1   0 -10   23.69    2.03 
  -1   0 -10   19.49    1.76 
  -1   0 -11   10.84    1.61 
  -1   0 -11   10.42    1.55 
   1  -1 -11  312.70   22.78 
   1   1 -11  311.14   22.82 
   1  -1 -11  327.66   23.77 
   1   1 -11  297.52   21.99 
   1   1 -11  300.72   21.98 
   1  -1 -11  341.34   24.76 
   1   1 -11  305.31   22.33 
   1  -1 -10  201.22   15.99 
   1   1 -10  214.32   16.94 
   1  -1 -10  212.49   16.82 
   1   1 -10  207.14   16.50 
   1  -1 -10  226.25   17.88 
   1   1 -10  199.19   16.02 
   1   1 -10  192.61   15.43 
   1   1 -10  177.59   14.22 
   1   1 -10  202.44   16.44 
   1  -1 -10  226.07   17.87 
   1   1 -10  186.36   15.27 
   1  -1 -10  191.34   15.37 
   1   1  -9  649.76   67.03 
  -1  -1   9  701.37   72.72 
   1  -1  -9  758.53   77.86 
   1  -1  -9  685.62   73.22 
   1   1  -9  694.68   73.59 
   1  -1  -9  751.57   77.23 
   1   1  -9  732.69   75.69 
   1  -1  -9  797.52   81.84 
   1   1  -9  682.95   71.40 
   1   1  -9  878.51   90.68 
   1  -1  -9  642.09   66.44 
   1   1  -9  680.51   70.37 
   1   1  -9  767.47   79.84 
   1  -1  -9  782.55   80.33 
   1   1  -9  700.13   72.85 
   1  -1  -9  687.49   71.38 
  -1   1   8  660.02   49.14 
  -1  -1   8  540.69   40.49 
   1   1  -8  505.29   36.70 
   1  -1  -8  521.81   37.63 
   1   1  -8  537.04   39.13 
  -1  -1   8  668.16   50.00 
   1  -1  -8  587.44   42.15 
  -1   1   8  572.48   43.30 
  -1   1   8  537.86   39.82 
  -1   1   8  516.47   38.01 
   1  -1  -8  505.41   38.77 
   1   1  -8  546.67   41.09 
   1  -1  -8  554.79   40.75 
   1   1  -8  664.32   48.76 
   1  -1  -8  607.83   43.53 
   1   1  -8  640.21   45.90 
   1  -1  -8  490.01   36.89 
   1   1  -8  558.88   41.17 
   1   1  -8  563.42   41.28 
   1  -1  -8  533.21   38.20 
   1   1  -8  552.97   40.35 
   1   1  -8  586.76   42.72 
   1  -1  -8  619.36   44.62 
   1  -1  -8  602.11   43.40 
   1   1  -8  605.27   43.86 
   1  -1  -8  545.51   39.80 
   1   1  -8  580.37   41.69 
  -1  -1   7  198.88   12.49 
   1  -1  -7  173.26   11.63 
   1   1  -7  159.69   10.01 
   1  -1  -7  145.77    9.26 
   1   1  -7  140.13    9.06 
  -1   1   7  132.23    8.60 
   1   1  -7  134.54    8.72 
  -1  -1   7  181.59   12.86 
   1  -1  -7  153.42   10.13 
  -1   1   7  166.57   11.60 
  -1  -1   7  184.34   11.63 
  -1   1   7  168.38   11.97 
  -1   1   7  149.70   10.21 
   1  -1  -7  135.88    9.02 
   1  -1  -7  148.00   10.18 
   1   1  -7  167.57   10.48 
   1  -1  -7  148.99    9.47 
   1   1  -7  156.24   10.48 
   1  -1  -7  154.31   10.22 
   1   1  -7  162.17   10.16 
   1  -1  -7  143.39    9.83 
   1   1  -7  149.91    9.63 
   1   1  -7  126.75    8.31 
   1  -1  -7  155.41    9.72 
   1   1  -7  147.64    9.44 
   1  -1  -7  158.81   10.05 
   1   1  -7  162.83   10.29 
   1  -1  -7  147.08   10.53 
   1   1  -7  169.47   10.89 
   1  -1  -7  159.34   10.39 
   1   1  -7  160.43   10.09 
  -1  -1   6  369.76   26.19 
   1  -1  -6  317.06   24.77 
  -1   1   6  261.65   18.87 
   1   1  -6  264.95   18.76 
   1  -1  -6  312.21   22.23 
   1   1  -6  290.59   20.86 
  -1   1   6  293.15   21.22 
   1   1  -6  330.19   23.76 
   1  -1  -6  278.25   20.20 
   1  -1  -6  324.45   23.08 
   1   1  -6  319.05   23.17 
  -1  -1   6  300.33   22.49 
   1  -1  -6  304.64   25.78 
  -1  -1   6  308.15   22.56 
   1  -1  -6  319.91   25.14 
   1  -1  -6  285.86   22.12 
   1   1  -6  296.57   21.19 
   1  -1  -6  331.48   23.54 
   1   1  -6  293.68   21.68 
   1   1  -6  303.24   21.60 
   1   1  -6  304.43   21.85 
   1  -1  -6  309.42   21.96 
   1   1  -6  309.55   22.09 
   1   1  -6  328.95   23.48 
   1  -1  -6  309.40   23.85 
   1   1  -6  296.12   21.50 
  -1  -1   5 1636.22  115.15 
   1  -1  -5 1429.48  107.69 
   1   1  -5 1354.97   94.61 
   1  -1  -5 1133.98   78.43 
   1  -1  -5 1383.22   96.21 
   1   1  -5 1411.77   98.42 
   1   1  -5 1320.86   92.61 
   1   1  -5 1524.48  105.89 
   1  -1  -5 1376.90   96.96 
   1  -1  -5 1522.41  107.74 
   1   1  -5 1500.46  106.13 
  -1  -1   5 1571.81  111.61 
   1  -1  -5 1534.29  115.40 
  -1  -1   5 1517.41  108.31 
   1  -1  -5 1603.24  116.06 
  -1  -1   5 1253.48   90.27 
   1  -1  -5 1564.53  119.50 
   1   1  -5 1404.03   98.03 
   1   1  -5 1352.23   94.37 
   1   1  -5 1374.25   95.48 
   1   1  -5 1379.65   96.36 
   1   1  -5 1466.02  101.92 
   1   1  -5 1500.10  104.25 
   1   1  -5 1419.93   99.80 
   1  -1  -5 1510.62  109.83 
   1   1  -4  472.87   43.38 
  -1  -1   4  489.21   46.95 
  -1  -1   4  539.80   49.97 
   1  -1  -4  558.36   55.25 
   1   1  -4  478.19   46.65 
   1  -1  -4  490.92   45.08 
   1  -1  -4  498.92   49.56 
   1   1  -4  517.90   47.26 
   1   1  -4  479.92   46.12 
   1  -1  -4  585.29   53.23 
   1   1  -4  589.67   53.78 
   1  -1  -4  478.12   44.43 
   1  -1  -4  566.68   52.14 
   1   1  -4  594.03   54.46 
  -1  -1   4  597.32   55.05 
   1  -1  -4  607.99   60.80 
  -1  -1   4  557.76   52.39 
   1  -1  -4  683.12   62.68 
  -1  -1   4  524.68   49.31 
   1  -1  -4  694.71   64.79 
   1   1  -3 2366.13  215.56 
  -1   1   3 2864.55  260.56 
  -1  -1   3 2645.10  255.55 
   1  -1  -3 2959.71  269.01 
  -1  -1   3 2879.69  272.28 
   1  -1  -3 3016.75  294.54 
   1   1  -3 2523.43  236.44 
   1  -1  -3 2537.55  232.92 
   1  -1  -3 2622.50  239.62 
   1   1  -3 2819.35  256.58 
   1   1  -3 2917.75  267.58 
   1  -1  -3 2913.62  265.57 
   1   1  -3 2650.65  241.28 
   1  -1  -3 2625.28  241.30 
  -1  -1   3 3263.43  299.50 
   1  -1  -3 2820.98  270.49 
  -1  -1   3 2828.41  263.27 
   1  -1  -3 3251.38  327.03 
  -1  -1   3 2810.91  259.44 
   1  -1  -3 3472.26  317.62 
  -1  -1   3 2688.66  247.10 
   1  -1  -3 3408.47  312.97 
  -1   1   2 7919.90  720.00 
  -1  -1   2 7901.58  733.30 
   1  -1  -2 8595.08  826.73 
   1   1  -2 7988.26  726.52 
   1   1  -2 7660.24  696.06 
  -1  -1   2 8718.54  803.03 
   1  -1  -2 9403.73  660.82 
   1  -1  -2 9514.54  661.89 
  -1   1   0  378.29   34.42 
   1   1   0  387.65   35.30 
   1  -1   0  395.03   35.96 
  -1  -1   0  432.99   39.53 
   1  -1   0  409.21   37.28 
  -1  -1   0  463.29   42.79 
  -1   1   0  347.00   31.66 
   1   1   0  353.00   32.24 
  -1  -1   0  403.43   36.82 
  -1   1   0  389.53   35.72 
   1   1   0  364.55   33.20 
   1  -1   0  389.08   35.52 
  -1  -1   0  386.49   35.30 
  -1   1   0  380.30   34.67 
  -1  -1   0  435.28   39.84 
   1  -1   0  455.67   41.46 
  -1  -1   0  482.59   44.57 
   1  -1   0  414.52   37.74 
  -1  -1   0  470.91   42.92 
   1   1   0  416.01   38.11 
   1  -1   0  429.00   39.08 
  -1  -1  -1 4982.47  454.98 
  -1   1  -1 4382.78  398.15 
   1   1   1 4491.39  409.32 
   1  -1   1 4594.25  417.76 
   1  -1   1 5406.77  493.14 
  -1  -1  -1 5655.63  514.86 
  -1   1  -1 4169.61  378.87 
   1   1   1 4121.02  376.32 
  -1  -1  -1 4984.49  454.68 
  -1   1  -1 4531.87  412.40 
   1   1   1 4535.32  412.50 
  -1   1  -1 3848.26  351.49 
  -1  -1  -1 4694.08  427.32 
  -1   1  -1 4705.04  427.68 
  -1  -1  -1 5257.15  478.87 
  -1   1  -1 4834.89  439.75 
   1  -1   1 4677.08  425.76 
  -1  -1  -1 6103.84  556.38 
   1  -1   1 4457.93  405.38 
  -1  -1  -1 5534.56  503.46 
   1   1   1 5235.78  476.55 
   1  -1   1 4472.73  407.43 
  -1  -1  -2 1363.16  124.13 
  -1   1  -2 1315.78  119.60 
   1   1   2 1338.39  121.89 
   1  -1   2 1320.67  120.28 
   1  -1   2 1444.59  131.33 
  -1  -1  -2 1594.17  145.27 
  -1   1  -2 1311.09  119.26 
  -1  -1  -2 1264.97  115.24 
  -1   1  -2 1313.83  119.45 
   1   1   2 1170.12  106.48 
  -1   1  -2 1162.05  105.74 
  -1  -1  -2 1276.97  116.08 
  -1  -1  -2 1591.86  145.05 
  -1   1  -2 1361.27  123.90 
   1  -1   2 1610.07  146.66 
  -1  -1  -2 1665.31  151.62 
   1  -1   2 1327.02  121.44 
   1   1   2 1402.85  127.56 
   1  -1   2 1242.88  113.15 
  -1  -1  -3  859.32   78.28 
  -1   1  -3  806.54   73.39 
   1   1   3  884.30   80.77 
   1  -1   3  808.54   73.81 
   1  -1   3  979.21   90.33 
  -1  -1  -3 1005.72   91.57 
  -1   1  -3  796.01   72.43 
  -1  -1  -3  853.87   77.61 
  -1   1  -3  882.98   80.26 
   1   1   3  802.56   73.00 
  -1   1  -3  803.61   73.12 
  -1  -1  -3  808.26   73.50 
  -1  -1  -3 1022.76   93.65 
  -1   1  -3  908.82   82.76 
   1  -1   3  921.70   84.65 
  -1  -1  -3 1144.52  104.17 
   1   1   3  962.94   87.77 
   1  -1   3  925.88   84.62 
   1   1   3  936.56   85.23 
   1  -1   3  885.17   80.55 
  -1  -1  -4  776.80   53.82 
  -1   1  -4  770.02   53.28 
   1   1   4  839.98   58.17 
   1  -1   4  751.39   52.50 
   1  -1   4  934.50   66.18 
  -1  -1  -4  932.22   64.53 
  -1   1  -4  769.40   53.20 
  -1  -1  -4  810.98   56.11 
  -1   1  -4  840.23   58.12 
   1   1   4  730.40   50.52 
  -1   1  -4  943.52   65.24 
  -1  -1  -4  720.35   55.30 
  -1  -1  -4  913.08   63.35 
  -1   1  -4  830.60   57.65 
   1  -1   4  939.65   66.42 
  -1  -1  -4  931.33   67.09 
   1   1   4  860.66   59.91 
   1  -1   4  906.93   62.94 
   1   1   4  889.43   61.77 
   1  -1   4  877.95   60.91 
  -1   1  -4  845.10   58.57 
  -1  -1  -4  848.37   58.68 
  -1  -1  -4  919.31   63.63 
  -1   1  -4  812.05   56.11 
  -1  -1  -4  908.51   62.83 
  -1   1  -4  782.87   54.10 
  -1  -1  -4  921.70   63.81 
  -1   1  -4  854.73   59.22 
  -1   1  -4  851.62   60.10 
  -1   1  -5   76.37    5.48 
   1  -1   5   83.56    6.19 
   1  -1   5   93.34    7.44 
  -1  -1  -5   94.37    6.93 
  -1  -1  -5   88.30    6.33 
  -1   1  -5   83.24    5.98 
   1   1   5   76.82    5.51 
  -1   1  -5   92.86    6.66 
  -1  -1  -5   96.18    6.88 
  -1  -1  -5  107.67    7.78 
  -1   1  -5   94.51    6.85 
   1   1   5   99.76    7.34 
   1  -1   5  108.35    7.82 
   1   1   5   96.13    6.98 
   1  -1   5   98.81    7.08 
   1   1   5   94.46    6.88 
   1  -1   5   90.19    6.47 
  -1  -1  -5   95.87    6.82 
  -1  -1  -5  100.43    7.33 
  -1   1  -5   98.06    7.00 
  -1  -1  -5   88.92    6.32 
  -1   1  -5   95.17    6.77 
  -1  -1  -5   99.08    7.12 
  -1   1  -5   95.49    6.85 
  -1   1  -5   94.25    6.68 
  -1   1  -5   94.49    6.70 
  -1  -1  -5  108.73    7.76 
  -1   1  -5   87.02    6.24 
  -1   1  -5  101.07    7.18 
  -1  -1  -5  107.55    7.67 
  -1   1  -5   95.32    7.07 
  -1  -1  -5  110.54    7.92 
  -1   1  -5  102.52    7.36 
   1  -1   6  218.38   14.32 
  -1  -1  -6  208.00   13.40 
  -1  -1  -6  213.48   13.37 
  -1   1  -6  197.11   12.36 
  -1   1  -6  195.65   12.26 
  -1  -1  -6  208.89   13.14 
  -1   1  -6  211.53   13.32 
   1   1   6  222.94   14.46 
   1  -1   6  207.34   13.05 
   1   1   6  210.08   13.44 
   1  -1   6  195.19   12.35 
   1   1   6  218.09   14.13 
   1  -1   6  191.61   12.02 
  -1  -1  -6  225.47   14.09 
  -1   1  -6  224.60   14.12 
  -1  -1  -6  196.62   12.42 
  -1   1  -6  208.10   13.03 
  -1  -1  -6  239.61   14.99 
  -1   1  -6  222.82   13.95 
  -1  -1  -6  209.27   13.29 
  -1   1  -6  196.42   12.27 
  -1  -1  -6  219.01   13.69 
  -1   1  -6  216.20   13.50 
  -1   1  -6  220.16   13.75 
  -1  -1  -6  159.86   19.62 
  -1   1  -6  246.25   15.37 
  -1  -1  -6  220.32   13.75 
  -1   1  -6  219.09   13.76 
  -1  -1  -6  232.83   14.78 
  -1   1  -6  220.40   13.81 
   1   1   7  811.68   62.56 
   1  -1   7  829.78   59.64 
  -1  -1  -7  830.18   59.44 
  -1   1  -7  714.45   51.30 
  -1   1  -7  747.59   53.58 
  -1  -1  -7  782.20   56.05 
  -1   1  -7  740.90   53.18 
   1   1   7  859.82   62.75 
   1  -1   7  759.04   54.37 
   1  -1   7  738.56   52.90 
   1   1   7  695.45   50.91 
  -1  -1  -7  854.77   61.20 
  -1   1  -7  810.78   58.24 
  -1  -1  -7  779.20   55.79 
  -1   1  -7  735.64   52.72 
  -1  -1  -7  818.12   58.78 
  -1   1  -7  825.50   59.21 
  -1  -1  -7  681.46   49.52 
  -1   1  -7  779.34   55.88 
  -1  -1  -7  840.88   60.96 
  -1   1  -7  740.48   53.09 
  -1  -1  -7  749.10   55.71 
  -1   1  -7  812.22   58.21 
  -1  -1  -7  806.31   57.74 
  -1   1  -7  762.69   54.72 
  -1  -1  -7  821.91   59.47 
  -1   1  -7  794.73   56.93 
   1   1   8  302.84   31.24 
  -1   1  -8  250.15   25.73 
   1  -1   8  352.18   36.48 
  -1  -1  -8  282.99   29.11 
   1   1   8  280.27   29.00 
   1  -1   8  248.04   25.74 
   1   1   8  249.76   26.02 
  -1  -1  -8  289.48   29.87 
  -1   1  -8  297.30   30.56 
  -1  -1  -8  323.83   33.24 
  -1   1  -8  289.00   29.68 
  -1  -1  -8  319.18   32.78 
  -1   1  -8  283.83   29.29 
  -1   1  -8  290.33   29.88 
  -1  -1  -8  291.30   30.11 
  -1   1  -8  308.12   31.69 
  -1  -1  -8  371.95   38.15 
  -1  -1  -8  290.64   30.29 
  -1   1  -8  292.28   30.06 
  -1  -1  -8  296.86   30.70 
  -1   1  -8  284.57   29.60 
  -1  -1  -9  126.73   10.12 
  -1   1  -9  126.11   10.03 
  -1  -1  -9  136.89   10.82 
  -1   1  -9  121.15    9.68 
  -1  -1  -9  127.06   10.09 
  -1   1  -9  118.21    9.44 
  -1   1  -9  116.91    9.30 
  -1  -1  -9  105.44    8.57 
  -1   1  -9  127.20   10.18 
  -1  -1  -9  116.80    9.24 
  -1  -1  -9  119.61    9.68 
  -1   1  -9  121.60    9.66 
  -1  -1  -9  103.82    8.78 
  -1   1  -9  121.88    9.69 
  -1  -1 -10    0.25    0.96 
  -1   1 -10    0.35    0.82 
  -1  -1 -10    1.51    0.82 
  -1   1 -10    0.99    1.00 
  -1  -1 -10    0.13    0.95 
  -1   1 -10    0.86    1.08 
  -1   1 -10    0.27    0.79 
  -1  -1 -10    1.43    0.89 
  -1   1 -10    0.77    0.93 
   1  -1  10    1.03    1.08 
  -1  -1 -10    1.36    0.98 
   1  -2 -11   73.92    9.74 
   1   2 -11   77.45   10.21 
   1  -2 -11   78.71   10.35 
   1   2 -11   76.74   10.10 
   1   2 -11   71.02    9.35 
   1   2 -11   62.89    8.30 
   1   2 -11   50.39    6.78 
   1   2 -11   66.98    8.91 
   1  -2 -11   59.12    7.82 
  -1  -2  10  153.67   13.10 
   1  -2 -10  114.56    9.86 
   1   2 -10  124.05   10.66 
   1  -2 -10  116.22   10.33 
   1   2 -10  129.37   11.07 
   1   2 -10  117.93   10.18 
   1  -2 -10   96.17    8.37 
   1   2 -10  107.93    9.32 
   1  -2 -10  134.80   11.47 
   1   2 -10  121.63   10.48 
   1  -2 -10  103.47    8.96 
   1  -2  -9  221.04   15.15 
   1   2  -9  233.59   15.77 
   1   2  -9  211.10   14.51 
   1  -2  -9  226.78   15.32 
   1   2  -9  237.49   16.15 
   1  -2  -9  191.87   13.76 
   1   2  -9  220.84   15.12 
   1   2  -9  226.25   15.41 
   1  -2  -9  207.16   13.89 
   1   2  -9  216.72   15.22 
   1   2  -9  143.56   28.20 
   1  -2  -9  237.71   15.89 
   1   2  -9  224.43   15.43 
   1  -2  -9  212.84   14.60 
  -1  -2   8  284.04   31.15 
   1  -2  -8  315.70   34.12 
   1   2  -8  299.67   31.72 
   1   2  -8  293.10   31.20 
  -1  -2   8  343.35   36.83 
   1  -2  -8  356.80   37.48 
  -1   2   8  332.29   36.56 
  -1   2   8  309.20   33.10 
  -1   2   8  275.42   29.52 
   1  -2  -8  294.77   32.02 
   1  -2  -8  313.05   34.16 
   1   2  -8  338.70   35.54 
   1   2  -8  384.69   40.75 
   1  -2  -8  299.06   32.98 
   1   2  -8  346.52   36.79 
   1  -2  -8  320.10   34.74 
   1   2  -8  338.48   35.92 
   1   2  -8  334.05   35.71 
   1  -2  -8  321.46   33.76 
   1   2  -8  323.33   34.16 
   1   2  -8  340.29   36.17 
   1  -2  -8  356.05   37.38 
   1   2  -8  335.83   36.14 
   1  -2  -8  324.09   35.25 
  -1  -2   7    8.15    1.14 
   1  -2  -7    8.70    1.30 
   1   2  -7    8.22    0.90 
   1   2  -7    9.10    1.20 
  -1   2   7    8.86    1.18 
   1   2  -7    6.61    1.36 
  -1  -2   7   11.32    1.56 
   1  -2  -7   10.46    1.34 
   1  -2  -7    8.29    1.46 
   1  -2  -7    8.34    1.42 
   1   2  -7    9.68    0.78 
   1  -2  -7   10.54    1.05 
   1  -2  -7    9.20    1.00 
   1   2  -7    9.09    0.99 
   1   2  -7   10.83    1.02 
   1  -2  -7    9.04    0.96 
   1   2  -7   10.24    1.02 
   1  -2  -7   10.55    1.12 
   1   2  -7   11.13    1.16 
   1   2  -7   11.74    1.00 
   1  -2  -7   10.12    1.15 
   1   2  -7   10.53    1.19 
   1   2  -7   10.40    1.13 
   1  -2  -7   11.29    1.06 
   1   2  -7   11.54    1.12 
   1  -2  -7   11.15    0.98 
   1  -2  -7   11.87    1.26 
  -1  -2   6  533.20   41.45 
   1  -2  -6  496.92   41.07 
  -1   2   6  446.99   34.50 
   1   2  -6  467.37   36.81 
   1  -2  -6  485.44   37.74 
   1   2  -6  475.87   37.38 
  -1   2   6  483.80   37.85 
   1   2  -6  439.16   34.29 
  -1  -2   6  502.04   41.53 
   1  -2  -6  506.09   39.32 
  -1  -2   6  423.60   35.03 
   1  -2  -6  512.56   44.51 
   1  -2  -6  528.00   43.65 
   1  -2  -6  547.54   48.22 
   1   2  -6  448.60   34.75 
   1  -2  -6  495.45   39.22 
   1  -2  -6  474.45   40.13 
   1   2  -6  474.81   37.11 
   1   2  -6  540.28   42.00 
   1  -2  -6  506.43   39.30 
   1   2  -6  481.02   37.94 
   1  -2  -6  512.89   42.27 
   1   2  -6  465.03   36.51 
   1   2  -6  452.36   42.30 
   1  -2  -6  529.27   40.80 
   1   2  -6  484.09   37.52 
   1   2  -6  501.84   39.10 
   1  -2  -6  506.67   39.10 
   1   2  -6  450.14   37.00 
   1  -2  -6  503.86   38.93 
   1  -2  -6  544.99   45.04 
   1   2  -5  692.37   48.62 
  -1  -2   5  715.17   52.52 
  -1  -2   5  806.02   59.89 
   1  -2  -5  864.20   64.97 
  -1   2   5  710.70   50.27 
   1   2  -5  696.62   53.37 
   1  -2  -5  816.38   56.66 
   1   2  -5  787.11   56.17 
  -1   2   5  767.61   53.45 
   1   2  -5  803.43   55.93 
  -1  -2   5  813.57   61.93 
   1  -2  -5  852.66   60.77 
  -1  -2   5  774.68   56.47 
   1  -2  -5  854.20   78.41 
   1  -2  -5  895.84   68.37 
   1  -2  -5  917.95   71.85 
   1   2  -5  808.76   56.05 
   1  -2  -5  833.60   60.46 
   1  -2  -5  824.28   57.52 
   1   2  -4  212.92   19.54 
  -1   2   4  221.11   20.29 
  -1  -2   4  211.19   20.29 
   1  -2  -4  214.55   20.31 
  -1  -2   4  237.69   22.28 
   1  -2  -4  267.35   28.12 
  -1   2   4  230.13   21.02 
   1   2  -4  234.44   21.45 
   1  -2  -4  249.44   22.86 
   1   2  -4  256.47   23.72 
  -1   2   4  249.43   22.74 
   1   2  -4  221.82   20.39 
  -1   2   4  202.55   18.68 
   1   2  -4  234.74   21.72 
  -1  -2   4  280.11   26.44 
   1  -2  -4  231.53   22.26 
  -1  -2   4  248.18   22.82 
   1  -2  -4  253.63   25.38 
  -1  -2   4  240.25   22.08 
   1  -2  -4  256.13   25.37 
   1  -2  -4  263.40   25.79 
   1   2  -3  129.86   11.97 
  -1   2   3  173.28   15.99 
  -1  -2   3  127.50   12.45 
   1  -2  -3  149.75   14.28 
  -1  -2   3  133.77   13.49 
   1  -2  -3  153.88   16.40 
  -1   2   3  134.56   12.32 
   1   2  -3  114.05   11.36 
   1  -2  -3  139.72   12.76 
   1   2  -3  148.66   13.70 
   1   2  -3  137.15   12.58 
   1  -2  -3  147.34   13.46 
  -1   2   3  117.46   10.88 
   1   2  -3  136.44   12.49 
  -1  -2   3  157.12   15.02 
   1  -2  -3  144.71   13.60 
  -1  -2   3  145.69   13.81 
   1  -2  -3  167.30   17.84 
   1  -2  -3  156.13   16.46 
   1  -2  -3  164.94   15.37 
  -1   2   2  786.51   72.20 
   1   2  -2  728.17   66.49 
   1  -2  -2  914.70   83.83 
  -1  -2   2  775.57   72.68 
  -1  -2   2  705.96   70.00 
   1  -2  -2  873.71   81.29 
  -1   2   2  740.83   68.18 
   1   2  -2  945.53   86.84 
   1   2  -2  817.59   75.34 
   1  -2  -2  781.97   73.39 
  -1   2   2  755.54   69.67 
   1   2  -2  728.02   66.41 
  -1  -2   2  889.42   83.39 
   1  -2  -2  760.38   71.60 
  -1  -2   2  827.69   81.04 
   1  -2  -2  898.26   89.71 
   1  -2  -2  957.11   89.14 
   1  -2  -2  984.91   90.46 
  -1   2   1 4432.57  403.25 
   1   2  -1 4316.08  393.47 
   1  -2  -1 4939.85  450.46 
  -1  -2   1 4768.65  445.83 
  -1  -2   1 4560.18  460.42 
   1  -2  -1 4813.54  447.95 
  -1   2   1 3812.26  356.65 
   1   2  -1 3890.24  362.95 
  -1  -2   1 4808.00  450.72 
   1   2  -1 4209.94  390.72 
   1  -2  -1 4594.75  417.39 
  -1   2   1 4418.87  408.32 
   1   2  -1 4431.53  403.65 
  -1  -2   1 4609.33  429.04 
   1  -2  -1 4910.57  469.01 
   1  -2  -1 4837.68  455.37 
  -1  -2   1 3847.82  398.05 
   1  -2  -1 5057.46  467.16 
  -1  -2   1 4863.42  468.43 
   1   2  -1 4188.52  410.23 
   1  -2  -1 5210.68  487.50 
  -1   2   0 2498.26  227.63 
   1   2   0 2554.61  233.32 
   1  -2   0 2637.11  241.40 
  -1  -2   0 2835.41  265.48 
   1  -2   0 2657.93  251.83 
  -1  -2   0 2750.19  263.41 
  -1   2   0 2294.37  211.62 
   1   2   0 2267.61  206.60 
  -1  -2   0 2558.19  239.21 
  -1   2   0 2634.32  239.63 
  -1   2   0 2475.69  225.85 
   1   2   0 2442.34  222.92 
  -1   2   0 2674.65  246.11 
   1   2   0 2656.06  242.85 
   1  -2   0 2771.52  257.83 
  -1  -2   0 2734.43  257.50 
   1  -2   0 2792.10  261.42 
  -1  -2   0 2773.62  298.35 
   1  -2   0 2816.47  265.94 
  -1  -2   0 3080.05  293.25 
   1  -2   0 2750.79  258.23 
  -1   2  -1 1588.70  144.62 
   1   2   1 1588.43  145.13 
   1  -2   1 1679.23  153.27 
  -1  -2  -1 1781.09  165.00 
   1  -2   1 1765.64  165.08 
  -1  -2  -1 1913.37  186.71 
  -1   2  -1 1368.94  126.17 
   1   2   1 1442.16  131.38 
  -1  -2  -1 1717.43  159.38 
  -1   2  -1 1606.10  147.25 
  -1   2  -1 1516.61  139.33 
   1   2   1 1572.55  143.06 
  -1   2  -1 1647.35  149.94 
   1  -2   1 1864.50  172.90 
  -1  -2  -1 1757.09  162.43 
   1  -2   1 1798.04  168.92 
  -1  -2  -1 1941.49  185.89 
   1  -2   1 1707.38  157.37 
  -1  -2  -1 1732.26  159.09 
   1  -2   1 1621.43  150.94 
  -1   2  -2  584.80   53.46 
   1   2   2  639.62   58.92 
   1  -2   2  594.69   54.58 
  -1  -2  -2  658.57   61.02 
   1  -2   2  648.71   60.77 
  -1  -2  -2  698.77   64.94 
  -1   2  -2  577.42   52.62 
   1   2   2  508.80   46.37 
  -1  -2  -2  642.55   58.98 
  -1   2  -2  612.02   55.69 
   1   2   2  585.14   53.40 
  -1   2  -2  620.79   56.56 
   1  -2   2  767.03   71.48 
  -1  -2  -2  680.26   64.77 
   1  -2   2  637.11   58.94 
  -1  -2  -2  754.65   71.67 
   1  -2   2  630.40   57.79 
  -1  -2  -2  783.32   72.06 
   1   2   2  651.15   59.71 
   1  -2   2  653.96   61.28 
  -1  -2  -3  330.09   32.03 
  -1   2  -3  325.08   29.67 
   1   2   3  352.28   32.63 
   1  -2   3  325.78   30.94 
   1  -2   3  351.02   32.41 
  -1  -2  -3  393.99   36.98 
   1   2   3  269.38   24.58 
  -1   2  -3  330.98   30.12 
  -1  -2  -3  337.43   31.06 
  -1   2  -3  341.18   31.08 
   1   2   3  322.32   29.37 
  -1   2  -3  347.83   31.66 
  -1  -2  -3  351.62   32.41 
  -1   2  -3  352.77   32.57 
   1  -2   3  351.34   32.21 
  -1  -2  -3  383.02   37.38 
   1  -2   3  305.10   32.24 
  -1  -2  -3  411.38   38.02 
   1   2   3  327.48   29.98 
   1  -2   3  338.23   31.00 
  -1  -2  -4  861.03   60.21 
  -1   2  -4  849.08   58.94 
   1   2   4  935.46   65.61 
   1  -2   4  854.03   61.65 
   1  -2   4  969.82   78.00 
  -1  -2  -4 1040.65   77.18 
  -1   2  -4  856.58   59.46 
  -1  -2  -4  811.43   56.35 
  -1   2  -4  942.29   65.28 
   1   2   4  840.92   58.27 
  -1   2  -4  842.13   59.64 
  -1  -2  -4  948.27   69.01 
  -1   2  -4  946.47   67.53 
   1  -2   4  923.00   65.08 
  -1  -2  -4 1040.22   76.67 
   1   2   4  882.66   63.69 
   1  -2   4  816.57   56.83 
   1   2   4 1080.95   76.89 
   1  -2   4  940.18   65.25 
  -1   2  -4 1025.65   71.05 
  -1   2  -4  942.45   65.25 
  -1   2  -4  910.51   64.81 
  -1   2  -5  519.09   40.35 
   1  -2   5  506.96   41.31 
   1  -2   5  597.32   54.72 
  -1  -2  -5  640.18   54.76 
  -1   2  -5  507.08   39.15 
  -1  -2  -5  637.32   49.14 
  -1   2  -5  619.63   47.83 
   1   2   5  512.70   39.67 
  -1   2  -5  564.18   43.49 
  -1  -2  -5  624.36   51.06 
  -1   2  -5  606.95   47.88 
   1  -2   5  588.00   45.92 
  -1  -2  -5  495.74   44.32 
   1   2   5  599.63   47.76 
   1  -2   5  599.14   46.35 
   1   2   5  584.76   46.20 
  -1  -2  -5  676.36   52.29 
  -1  -2  -5  642.83   50.39 
  -1   2  -5  595.80   46.10 
  -1  -2  -5  647.68   49.93 
  -1   2  -5  584.92   45.31 
  -1  -2  -5  637.61   49.97 
  -1   2  -5  592.19   46.33 
  -1  -2  -5  670.13   52.16 
  -1   2  -5  590.88   45.52 
  -1   2  -5  737.34   56.77 
  -1  -2  -5  692.06   53.49 
  -1   2  -5  623.99   48.08 
  -1   2  -5  586.25   45.35 
  -1  -2  -5  581.86   47.95 
  -1   2  -5  597.87   46.86 
  -1  -2  -5  490.45   39.35 
  -1   2  -5  596.90   46.32 
   1  -2   6   71.75    5.49 
  -1  -2  -6   72.12    5.70 
  -1  -2  -6   70.69    5.20 
  -1   2  -6   68.75    5.06 
  -1   2  -6   73.41    5.44 
   1  -2   6   69.86    5.71 
  -1  -2  -6   79.03    5.84 
   1   2   6   72.97    5.74 
   1  -2   6   61.59    5.05 
   1   2   6   67.08    5.23 
   1  -2   6   66.82    4.93 
   1   2   6   64.50    5.01 
  -1  -2  -6   68.87    5.05 
  -1  -2  -6   71.64    5.39 
  -1   2  -6   72.75    5.33 
  -1  -2  -6   74.26    5.42 
  -1   2  -6   69.95    5.10 
  -1  -2  -6   79.20    5.85 
  -1   2  -6   56.70    4.20 
  -1  -2  -6   73.90    5.49 
  -1   2  -6   72.49    5.24 
  -1   2  -6   81.99    5.89 
  -1  -2  -6   74.30    5.50 
  -1   2  -6   68.82    4.97 
  -1   2  -6   33.44   12.06 
  -1  -2  -6   76.28    6.07 
  -1   2  -6   68.48    5.02 
  -1  -2  -6   69.09    5.44 
  -1   2  -6   65.27    5.04 
   1  -2   7   43.26    4.74 
  -1  -2  -7   40.81    4.77 
  -1   2  -7   39.29    4.31 
  -1   2  -7   43.59    4.70 
   1  -2   7   44.23    5.01 
  -1  -2  -7   46.43    5.06 
   1   2   7   44.37    4.94 
   1  -2   7   41.26    4.69 
   1   2   7   42.86    4.85 
  -1  -2  -7   40.73    4.36 
  -1  -2  -7   44.27    4.78 
  -1   2  -7   45.45    4.92 
  -1  -2  -7   45.15    4.86 
  -1   2  -7   42.93    4.63 
  -1  -2  -7   46.20    5.00 
  -1   2  -7   45.58    5.02 
  -1  -2  -7   39.83    4.43 
  -1   2  -7   41.53    4.44 
  -1   2  -7   45.67    4.86 
  -1  -2  -7   44.14    4.87 
  -1   2  -7   43.32    4.60 
  -1   2  -7   46.35    5.03 
  -1  -2  -7   46.50    4.96 
  -1   2  -7   42.74    4.65 
  -1  -2  -7   43.18    4.86 
  -1   2  -7   42.31    4.57 
  -1  -2  -8  472.91   32.33 
  -1   2  -8  489.43   32.79 
  -1  -2  -8  445.81   30.56 
  -1   2  -8  467.76   31.66 
  -1  -2  -8  485.81   32.47 
  -1   2  -8  508.69   34.68 
  -1  -2  -8  423.78   30.00 
  -1   2  -8  469.04   31.46 
  -1  -2  -8  439.73   31.05 
  -1   2  -8  435.95   29.17 
  -1   2  -8  444.08   30.01 
  -1  -2  -8  500.23   33.43 
  -1   2  -8  471.54   32.01 
   1  -2   8  444.60   33.66 
  -1  -2  -8  464.14   32.56 
  -1  -2  -9  275.63   24.16 
  -1   2  -9  296.17   25.18 
  -1  -2  -9  267.39   23.69 
  -1   2  -9  293.67   25.09 
  -1  -2  -9  260.92   23.18 
  -1   2  -9  293.60   25.08 
   1   2   9  223.09   19.35 
  -1   2  -9  292.75   25.05 
  -1  -2  -9  255.36   22.06 
  -1   2  -9  278.11   23.75 
  -1   2  -9  283.63   24.24 
  -1  -2  -9  294.61   25.42 
  -1   2  -9  288.77   24.72 
   1  -2   9  302.44   25.72 
  -1  -2  -9  258.88   22.57 
   1  -2  10   60.49    8.01 
  -1  -2 -10   52.45    7.01 
  -1   2 -10   52.84    7.01 
  -1  -2 -10   62.99    8.35 
  -1   2 -10   65.81    8.72 
  -1   2 -10   49.96    6.60 
  -1   2 -10   49.96    6.64 
  -1  -2 -10   55.85    7.36 
  -1   2 -10   51.45    6.82 
  -1  -2 -10   43.62    5.87 
   1  -3 -11   71.31    9.07 
   1   3 -11   68.46    8.72 
   1   3 -11   70.02    8.91 
   1   3 -11   63.78    8.12 
   1   3 -11   69.02    8.85 
   1   3 -11   61.39    8.21 
   1  -3 -11   56.64    7.24 
   1  -3 -10  131.95   11.03 
   1   3 -10  139.72   11.77 
   1  -3 -10  144.06   11.95 
   1   3 -10  134.82   11.26 
   1  -3 -10  110.82    9.36 
   1   3 -10  121.54   11.26 
   1   3 -10  148.17   12.36 
   1  -3 -10  125.68   10.65 
   1   3 -10  133.66   11.24 
   1   3 -10   74.62   25.55 
   1   3 -10  144.41   12.08 
   1  -3 -10  129.68   10.85 
   1  -3  -9  231.83   18.90 
  -1  -3   9  287.35   23.28 
   1  -3  -9  256.24   20.63 
   1   3  -9  258.10   20.74 
   1  -3  -9  237.41   19.37 
   1   3  -9  251.82   20.26 
   1  -3  -9  216.41   17.86 
   1   3  -9  243.84   19.82 
   1   3  -9  279.69   22.20 
   1  -3  -9  231.67   18.36 
   1   3  -9  230.91   18.46 
   1   3  -9  250.26   20.21 
   1   3  -9  243.75   19.45 
   1  -3  -9  234.11   18.92 
   1  -3  -8  326.23   26.79 
   1   3  -8  321.60   25.88 
   1   3  -8  303.74   24.55 
  -1  -3   8  334.91   27.65 
   1  -3  -8  309.44   25.21 
  -1   3   8  306.34   25.11 
  -1   3   8  314.88   25.43 
   1   3  -8  350.22   27.82 
   1  -3  -8  324.73   28.32 
  -1  -3   8  372.72   30.43 
   1  -3  -8  348.10   28.15 
   1   3  -8  246.27   20.30 
   1  -3  -8  347.91   27.94 
   1   3  -8  367.96   29.72 
   1  -3  -8  345.59   28.63 
   1   3  -8  339.49   27.49 
   1   3  -8  403.47   32.19 
   1  -3  -8  332.66   26.44 
   1   3  -8  325.77   26.28 
   1  -3  -8  336.91   27.69 
   1   3  -8  363.72   29.23 
   1  -3  -8  360.84   28.69 
   1  -3  -8  351.23   29.19 
  -1  -3   7   19.14    1.95 
   1  -3  -7   18.74    1.97 
   1   3  -7   22.20    1.84 
   1   3  -7   20.62    1.88 
  -1   3   7   16.62    1.51 
   1   3  -7   22.20    1.96 
  -1  -3   7   21.25    2.27 
   1  -3  -7   21.31    2.07 
   1  -3  -7   19.18    2.34 
   1  -3  -7   16.83    2.03 
  -1   3   7   16.36    1.69 
   1   3  -7   20.19    1.59 
   1  -3  -7   21.20    1.87 
  -1  -3   7   21.35    1.80 
   1  -3  -7   20.46    1.83 
   1   3  -7   19.55    1.63 
   1  -3  -7   20.76    1.96 
   1   3  -7   20.39    1.77 
   1  -3  -7   20.04    2.20 
   1   3  -7   19.90    1.77 
   1   3  -7   22.19    1.85 
   1  -3  -7   22.35    1.97 
   1   3  -7   18.88    1.59 
   1   3  -7   20.13    1.66 
   1  -3  -7   21.83    1.74 
   1   3  -7   26.50    2.09 
   1  -3  -7   23.10    1.83 
   1  -3  -7   19.95    1.94 
  -1  -3   6  246.24   17.35 
   1  -3  -6  250.74   16.46 
   1   3  -6  220.92   13.81 
   1   3  -6  229.39   14.97 
  -1   3   6  246.10   15.53 
   1   3  -6  271.93   17.62 
  -1  -3   6  268.06   18.90 
   1  -3  -6  232.77   15.34 
   1  -3  -6  243.34   17.35 
   1  -3  -6  263.48   18.41 
   1  -3  -6  267.38   17.97 
   1   3  -6  221.60   17.28 
   1  -3  -6  280.92   18.58 
   1  -3  -6  259.13   17.51 
   1   3  -6  248.59   16.01 
   1  -3  -6  234.25   16.24 
   1   3  -6  270.06   17.43 
   1  -3  -6  273.30   18.68 
   1   3  -6  256.90   16.45 
   1   3  -6  244.11   15.41 
   1  -3  -6  262.70   17.18 
   1   3  -6  240.92   15.39 
   1   3  -6  232.84   15.05 
   1  -3  -6  205.22   13.81 
   1   3  -6  259.02   16.57 
   1  -3  -6  270.55   17.00 
   1  -3  -6  260.89   17.83 
   1   3  -5   59.07    4.70 
  -1  -3   5   56.30    4.88 
  -1  -3   5   58.13    4.96 
   1  -3  -5   60.08    5.10 
  -1   3   5   50.88    4.09 
   1   3  -5   65.25    5.12 
   1   3  -5   59.17    4.72 
  -1   3   5   54.65    4.38 
   1   3  -5   54.80    4.36 
  -1  -3   5   55.85    5.07 
   1  -3  -5   56.57    4.68 
   1  -3  -5   62.50    5.94 
   1  -3  -5   61.31    5.78 
   1  -3  -5   61.89    5.98 
   1   3  -5   62.16    4.83 
   1  -3  -5   66.33    5.25 
  -1  -3   5   59.94    5.04 
   1  -3  -5   59.74    4.97 
   1   3  -5   61.53    4.84 
   1  -3  -5   59.18    4.89 
   1   3  -5   58.51    4.72 
   1  -3  -5   65.26    5.87 
   1   3  -5   62.19    4.95 
   1   3  -5   64.16    5.00 
   1  -3  -5   59.84    4.85 
   1   3  -5   60.57    4.72 
   1   3  -5   61.88    4.90 
   1   3  -5   62.51    4.98 
   1  -3  -5   62.20    4.89 
   1  -3  -5   64.65    5.74 
   1   3  -4  661.13   47.44 
  -1   3   4  610.69   44.49 
  -1  -3   4  658.59   51.74 
   1  -3  -4  647.76   49.52 
  -1  -3   4  639.97   51.51 
   1  -3  -4  759.95   60.10 
  -1   3   4  668.63   46.41 
   1   3  -4  691.54   48.22 
   1   3  -4  744.37   52.95 
  -1   3   4  725.96   50.36 
   1   3  -4  666.18   46.55 
   1   3  -4  708.86   49.19 
  -1  -3   4  724.01   53.48 
   1  -3  -4  653.24   48.43 
  -1  -3   4  643.87   53.28 
   1  -3  -4  736.50   55.97 
   1  -3  -4  743.41   57.36 
   1  -3  -4  801.99   64.50 
  -1  -3   4  619.20   47.64 
   1   3  -4  665.19   46.67 
   1   3  -4  629.18   43.98 
   1   3  -4  653.65   45.69 
   1   3  -4  645.03   44.78 
   1   3  -4  707.16   50.13 
  -1   3   3  178.23   12.82 
   1   3  -3  175.24   12.36 
   1  -3  -3  182.19   13.61 
  -1  -3   3  176.86   13.36 
  -1  -3   3  173.53   14.43 
   1  -3  -3  190.81   16.22 
  -1   3   3  154.40   11.66 
   1   3  -3  177.48   12.46 
   1   3  -3  183.99   13.27 
  -1   3   3  153.61   10.78 
   1   3  -3  220.78   15.44 
   1   3  -3  175.96   12.32 
  -1  -3   3  191.66   14.61 
   1  -3  -3  188.41   14.12 
  -1  -3   3  171.23   13.08 
   1  -3  -3  207.30   17.49 
   1  -3  -3  205.35   16.32 
   1  -3  -3  220.53   17.75 
   1   3  -3  163.18   12.24 
   1  -3  -3  215.84   15.15 
   1  -3  -3  190.96   14.83 
   1   3  -3  183.91   12.91 
   1   3  -3  182.82   12.86 
   1  -3  -3  198.27   14.38 
   1   3  -3  168.19   13.83 
   1  -3  -3  207.69   15.83 
   1   3  -3  205.98   14.57 
   1  -3  -3  194.93   13.62 
  -1   3   2  165.13   15.45 
   1   3  -2  154.84   14.41 
   1  -3  -2  186.85   17.76 
  -1  -3   2  167.85   17.20 
  -1  -3   2  157.58   15.49 
   1  -3  -2  178.65   17.96 
  -1   3   2  150.27   13.94 
   1   3  -2  153.12   14.17 
  -1  -3   2  177.83   17.21 
  -1   3   2  173.39   15.87 
   1   3  -2  143.13   13.12 
  -1   3   2  170.33   15.76 
   1   3  -2  170.21   15.62 
  -1  -3   2  188.59   18.75 
   1  -3  -2  182.75   17.15 
  -1  -3   2  159.65   15.48 
   1  -3  -2  195.20   20.11 
   1  -3  -2  184.50   18.55 
  -1  -3   2  149.71   13.83 
   1  -3  -2  190.36   19.85 
  -1   3   1 5029.56  459.53 
   1   3  -1 4946.41  459.51 
   1  -3  -1 5483.46  504.51 
  -1  -3   1 4805.07  496.79 
  -1  -3   1 5081.67  500.59 
   1  -3  -1 5610.61  566.98 
  -1   3   1 4707.07  433.96 
   1   3  -1 4880.73  445.60 
  -1  -3   1 5090.35  475.45 
  -1   3   1 4805.43  443.90 
   1   3  -1 4959.06  453.05 
  -1   3   1 4863.43  454.06 
   1   3  -1 4971.88  454.92 
  -1  -3   1 5551.41  533.22 
   1  -3  -1 5465.13  507.34 
   1  -3  -1 5253.81  532.30 
  -1  -3   1 4940.42  520.25 
   1  -3  -1 5533.22  574.16 
  -1  -3   1 5068.44  493.80 
   1   3  -1 4956.11  465.90 
   1  -3  -1 5576.47  531.66 
  -1   3   0   59.58    5.56 
   1   3   0   57.28    5.35 
   1  -3   0   62.90    5.95 
  -1  -3   0   62.78    6.15 
   1  -3   0   61.73    6.33 
  -1  -3   0   61.09    6.30 
  -1   3   0   55.13    5.20 
   1   3   0   51.59    4.85 
  -1  -3   0   56.03    5.46 
  -1   3   0   59.98    5.59 
  -1   3   0   58.08    5.37 
   1   3   0   51.67    5.07 
  -1   3   0   60.92    5.67 
   1   3   0   64.66    6.01 
   1  -3   0   65.43    6.38 
  -1  -3   0   65.62    6.34 
   1  -3   0   62.88    6.31 
  -1  -3   0   65.49    7.20 
   1  -3   0   65.60    6.74 
  -1  -3   0   61.74    6.08 
   1  -3   0   64.15    6.62 
  -1  -3   0   68.19    6.38 
  -1   3  -1 1140.19  105.23 
   1   3   1 1173.07  107.86 
   1  -3   1 1133.21  110.96 
  -1  -3  -1 1263.49  117.27 
   1  -3   1 1233.38  117.64 
  -1  -3  -1 1271.76  125.79 
  -1   3  -1 1210.09  110.21 
   1   3   1 1004.73   93.93 
  -1  -3  -1 1244.60  114.66 
  -1   3  -1 1217.97  111.50 
  -1   3  -1 1093.91   99.59 
   1   3   1 1176.68  107.30 
  -1   3  -1 1179.61  108.77 
   1  -3   1 1227.22  117.01 
  -1  -3  -1 1372.52  133.95 
   1  -3   1 1230.63  120.30 
  -1  -3  -1 1286.82  127.20 
   1  -3   1 1233.29  116.47 
  -1  -3  -1 1354.35  137.35 
   1  -3   1 1146.70  109.83 
  -1  -3  -1 1455.50  135.57 
  -1   3  -2  271.40   18.96 
   1   3   2  287.84   20.49 
   1  -3   2  277.91   20.14 
  -1  -3  -2  303.81   21.83 
   1  -3   2  272.51   22.49 
  -1  -3  -2  312.57   25.73 
   1   3   2  245.29   17.09 
  -1   3  -2  238.91   17.06 
  -1  -3  -2  300.79   21.76 
  -1   3  -2  285.01   19.86 
   1   3   2  246.55   19.41 
  -1   3  -2  267.50   19.60 
  -1   3  -2  278.46   19.37 
   1  -3   2  296.50   22.07 
  -1  -3  -2  292.23   23.53 
   1  -3   2  282.02   21.17 
  -1  -3  -2  316.95   27.74 
   1  -3   2  290.51   21.64 
  -1  -3  -2  300.61   21.97 
   1  -3   2  255.21   19.38 
  -1   3  -2  246.54   17.23 
   1  -3   2  247.31   17.75 
  -1   3  -2  232.64   16.30 
   1  -3   2  301.44   22.10 
  -1  -3  -2  283.15   20.84 
  -1   3  -2  268.43   19.16 
  -1  -3  -2  328.46   22.99 
  -1   3  -2  262.22   18.15 
  -1  -3  -2  269.72   19.97 
  -1  -3  -2  259.39   20.83 
  -1  -3  -3  875.73   72.02 
  -1   3  -3  927.57   65.06 
   1   3   3  792.10   61.60 
   1  -3   3  902.70   68.24 
   1  -3   3  988.10   81.32 
  -1  -3  -3  910.89   69.40 
   1   3   3  776.76   54.75 
  -1   3  -3  919.61   63.82 
  -1  -3  -3  986.93   69.44 
  -1   3  -3  955.66   66.77 
   1   3   3  846.28   61.74 
  -1   3  -3  847.65   63.24 
   1  -3   3 1004.84   73.36 
  -1  -3  -3  972.89   71.92 
   1  -3   3  910.00   69.07 
  -1  -3  -3  987.82   82.55 
   1  -3   3  995.07   73.63 
  -1  -3  -3 1027.50   75.78 
   1   3   3 1008.95   72.83 
   1  -3   3  864.59   62.89 
   1  -3   3  815.68   58.86 
  -1  -3  -3  957.47   70.42 
  -1  -3  -3  811.50   58.19 
  -1   3  -3  879.15   61.43 
  -1   3  -3  879.48   63.30 
  -1  -3  -3 1095.17   77.07 
  -1   3  -3  915.59   63.38 
  -1  -3  -3  989.12   72.38 
  -1   3  -3  912.80   63.56 
  -1   3  -3  905.38   63.01 
  -1   3  -3  902.41   63.06 
   1  -3   3  900.97   65.14 
  -1  -3  -3  959.55   73.37 
  -1  -3  -4  642.23   50.97 
  -1   3  -4  667.57   52.28 
   1   3   4  679.46   54.05 
   1  -3   4  662.32   56.71 
   1  -3   4  691.91   57.59 
  -1  -3  -4  772.06   66.91 
  -1   3  -4  735.63   56.85 
  -1  -3  -4  624.71   48.43 
  -1   3  -4  699.79   54.24 
   1   3   4  642.66   49.74 
  -1   3  -4  672.66   52.39 
   1  -3   4  821.63   66.46 
  -1  -3  -4  713.80   57.31 
   1  -3   4  703.10   57.31 
  -1  -3  -4  759.48   66.67 
   1  -3   4  702.70   56.82 
  -1  -3  -4  795.75   67.40 
   1   3   4  745.73   60.66 
  -1   3  -4  636.99   49.23 
   1  -3   4  631.39   50.20 
  -1   3  -4  666.93   51.77 
  -1  -3  -4  784.93   61.12 
  -1  -3  -4  738.59   59.75 
  -1   3  -4  699.19   55.67 
  -1   3  -4  687.08   53.52 
  -1  -3  -4  737.02   60.64 
  -1   3  -4  724.24   56.83 
  -1  -3  -4  820.84   64.12 
  -1   3  -4  737.35   56.81 
  -1   3  -4  703.08   56.11 
  -1  -3  -4  786.87   62.66 
  -1   3  -4  735.32   56.70 
  -1   3  -4  638.04   59.36 
  -1  -3  -4  731.86   58.81 
  -1   3  -4  715.17   56.91 
  -1  -3  -4  776.03   60.02 
   1  -3   4  750.27   60.32 
  -1  -3  -4  813.42   69.74 
  -1   3  -5  516.12   32.50 
   1  -3   5  536.65   37.19 
   1  -3   5  583.13   41.74 
  -1  -3  -5  644.81   43.62 
  -1   3  -5  591.36   36.82 
  -1   3  -5  553.75   35.09 
   1   3   5  543.19   33.85 
  -1   3  -5  553.70   34.85 
   1  -3   5  618.84   42.09 
  -1  -3  -5  606.56   39.78 
   1  -3   5  578.02   48.50 
  -1  -3  -5  580.40   41.00 
   1   3   5  648.74   45.49 
   1   3   5  572.84   40.07 
  -1   3  -5  476.39   29.80 
   1  -3   5  495.61   31.06 
  -1   3  -5  584.97   36.51 
  -1  -3  -5  673.57   42.00 
  -1  -3  -5  612.79   42.32 
  -1   3  -5  603.37   38.37 
  -1  -3  -5  614.01   39.12 
  -1   3  -5  591.82   37.72 
  -1  -3  -5  627.20   41.80 
  -1   3  -5  621.84   40.82 
  -1  -3  -5  667.14   43.08 
  -1   3  -5  613.83   38.23 
  -1   3  -5  596.32   37.35 
  -1  -3  -5  647.75   40.33 
  -1   3  -5  629.50   39.21 
  -1   3  -5  622.02   39.86 
  -1  -3  -5  651.33   41.65 
  -1   3  -5  615.02   39.90 
   1  -3   5  615.82   41.98 
  -1  -3  -5  655.15   44.45 
   1  -3   6   39.66    3.32 
  -1  -3  -6   38.32    3.50 
  -1   3  -6   37.64    2.94 
   1   3   6   34.02    2.67 
  -1   3  -6   33.62    2.64 
   1  -3   6   40.93    3.56 
  -1  -3  -6   35.94    3.41 
   1  -3   6   33.38    2.87 
  -1  -3  -6   41.58    3.85 
   1   3   6   39.24    3.41 
   1   3   6   36.03    2.99 
  -1  -3  -6   39.20    3.01 
  -1  -3  -6   28.71    2.57 
  -1   3  -6   37.66    2.87 
  -1  -3  -6   37.95    2.85 
  -1   3  -6   37.25    2.78 
  -1  -3  -6   37.22    3.13 
  -1   3  -6   38.28    2.99 
  -1  -3  -6   39.39    3.07 
  -1   3  -6   36.78    2.74 
  -1   3  -6   40.67    3.00 
  -1  -3  -6   37.75    2.99 
  -1   3  -6   33.77    2.52 
  -1   3  -6   42.76    3.19 
  -1  -3  -6   35.39    2.91 
  -1   3  -6   38.97    2.96 
   1  -3   6   32.40    2.66 
  -1  -3  -6   40.13    3.31 
   1  -3   7    3.23    1.50 
  -1  -3  -7    9.34    1.83 
  -1   3  -7    3.71    1.49 
  -1   3  -7    4.42    1.19 
   1  -3   7    5.12    1.84 
  -1  -3  -7    6.16    1.80 
   1   3   7    2.78    1.30 
   1   3   7    5.79    1.39 
   1   3   7    4.00    1.42 
  -1  -3  -7    2.58    1.11 
  -1  -3  -7    5.33    1.23 
  -1   3  -7    3.85    1.00 
  -1  -3  -7    3.85    0.88 
  -1   3  -7    2.40    1.16 
  -1  -3  -7    2.56    1.01 
  -1   3  -7    3.95    1.21 
  -1  -3  -7    3.26    1.36 
  -1   3  -7    2.60    0.88 
  -1   3  -7    3.92    1.03 
  -1  -3  -7    4.36    1.22 
  -1   3  -7    2.76    0.98 
  -1   3  -7    2.92    1.06 
  -1  -3  -7    3.53    1.30 
  -1   3  -7    2.61    1.09 
   1  -3   7    2.52    1.02 
  -1  -3  -7    5.74    1.90 
   1   3   8  152.75   12.19 
   1  -3   8  209.02   17.65 
  -1  -3  -8  184.39   15.02 
  -1  -3  -8  194.97   15.40 
  -1   3  -8  179.08   14.30 
  -1  -3  -8  182.51   14.60 
  -1   3  -8  178.71   14.53 
  -1  -3  -8  170.07   14.12 
  -1   3  -8  177.48   14.10 
  -1   3  -8  173.30   15.16 
  -1  -3  -8  174.11   14.39 
  -1   3  -8  180.60   14.33 
  -1   3  -8  183.83   14.83 
  -1  -3  -8  189.16   15.12 
  -1   3  -8  174.74   14.03 
   1  -3   8  177.68   14.63 
  -1  -3  -8  170.27   13.93 
  -1  -3  -9  125.18   10.46 
  -1   3  -9  123.08   10.33 
  -1  -3  -9  126.64   10.64 
  -1   3  -9  128.55   10.74 
  -1   3  -9  128.04   10.67 
  -1  -3  -9  113.04    9.57 
  -1   3  -9  118.07   10.02 
  -1   3  -9  130.32   11.07 
  -1  -3  -9  134.49   11.23 
  -1   3  -9  132.60   11.11 
  -1  -3  -9  111.69    9.67 
   1  -3  10  114.79   14.69 
  -1  -3 -10  110.21   14.02 
  -1   3 -10  103.96   13.23 
  -1  -3 -10  118.36   15.04 
  -1   3 -10  111.48   14.21 
  -1   3 -10  110.53   14.05 
  -1  -3 -10   92.95   11.88 
  -1   3 -10  101.13   12.84 
  -1  -3 -10  111.56   14.17 
  -1   3 -10  107.75   13.70 
  -1  -3 -10   91.76   11.79 
   1  -4 -10  113.49   14.99 
   1   4 -10  115.41   15.24 
  -1  -4  10  113.40   15.27 
   1  -4 -10   92.38   12.24 
   1   4 -10  111.62   14.75 
   1   4 -10  113.88   15.69 
   1  -4 -10  102.82   13.63 
   1   4 -10  106.37   14.03 
   1   4 -10  119.97   16.08 
   1  -4 -10  102.10   13.49 
   1  -4  -9   56.29    5.16 
   1  -4  -9   62.69    5.47 
   1   4  -9   67.00    5.81 
  -1  -4   9   70.13    6.38 
   1  -4  -9   60.14    5.30 
   1  -4  -9   58.14    5.33 
   1   4  -9   62.06    5.44 
   1   4  -9   78.01    6.71 
   1  -4  -9   61.45    5.51 
   1   4  -9   67.62    5.88 
   1   4  -9   67.40    5.88 
   1   4  -9   60.71    5.36 
   1  -4  -9   64.97    5.82 
   1   4  -8  700.75   46.84 
   1  -4  -8  630.04   46.34 
  -1  -4   8  550.58   41.28 
   1  -4  -8  640.67   43.88 
   1   4  -8  640.23   44.18 
   1  -4  -8  680.16   46.20 
   1   4  -8  702.59   48.33 
   1  -4  -8  630.34   46.27 
   1   4  -8  719.85   48.94 
   1   4  -8  746.43   50.16 
   1  -4  -8  598.86   39.99 
   1   4  -8  642.36   43.51 
   1   4  -8  622.35   43.02 
   1   4  -8  660.51   44.84 
   1  -4  -8  687.22   45.97 
   1  -4  -8  604.91   44.19 
   1  -4  -7   45.44    4.33 
   1   4  -7   45.99    3.92 
  -1  -4   7   46.20    4.70 
  -1   4   7   45.18    3.89 
   1   4  -7   40.60    3.52 
  -1  -4   7   47.12    4.27 
   1  -4  -7   40.50    3.85 
   1  -4  -7   44.55    4.18 
  -1   4   7   44.44    3.86 
   1   4  -7   51.45    4.23 
   1  -4  -7   51.13    4.47 
  -1  -4   7   53.95    4.80 
   1  -4  -7   49.19    4.46 
   1   4  -7   45.01    3.97 
   1  -4  -7   49.22    4.20 
   1   4  -7   53.86    4.59 
   1  -4  -7   50.85    4.55 
   1   4  -7   48.22    4.03 
   1   4  -7   51.09    4.23 
   1  -4  -7   46.57    3.97 
   1   4  -7   45.55    3.82 
   1   4  -7   40.64    3.94 
   1   4  -7   42.53    3.69 
   1  -4  -7   46.90    4.22 
   1  -4  -7   46.90    4.10 
  -1  -4   6  138.83   10.49 
   1  -4  -6  159.76   12.39 
   1   4  -6  178.31   12.99 
  -1  -4   6  138.96   11.02 
  -1   4   6  148.72   11.04 
   1   4  -6  145.26   10.65 
  -1  -4   6  153.73   11.53 
   1  -4  -6  148.73   11.26 
   1  -4  -6  143.80   11.28 
   1  -4  -6  132.84   10.71 
   1   4  -6  155.97   11.94 
   1  -4  -6  169.34   13.27 
  -1  -4   6  161.49   13.55 
   1  -4  -6  158.95   12.30 
   1   4  -6  154.26   11.27 
   1  -4  -6  163.31   12.17 
   1   4  -6  181.98   13.52 
   1  -4  -6  160.74   13.97 
   1   4  -6  160.36   11.53 
   1   4  -6  153.11   11.29 
   1   4  -6  173.61   12.65 
   1  -4  -6  142.87   10.36 
   1   4  -6  150.17   11.01 
   1   4  -6  155.17   11.49 
   1   4  -6  164.15   12.02 
   1  -4  -6  165.40   12.20 
   1  -4  -6  157.94   12.80 
   1   4  -5   26.47    1.83 
  -1  -4   5   27.12    2.25 
  -1  -4   5   26.82    2.28 
   1  -4  -5   30.54    2.32 
  -1   4   5   27.62    1.97 
   1   4  -5   32.49    2.26 
  -1  -4   5   28.02    2.44 
  -1   4   5   29.23    2.12 
   1   4  -5   31.48    2.28 
  -1  -4   5   28.91    2.64 
   1  -4  -5   28.38    2.08 
   1  -4  -5   28.55    2.40 
   1  -4  -5   28.54    2.44 
   1  -4  -5   28.83    2.46 
   1   4  -5   27.89    1.81 
  -1  -4   5   28.18    2.00 
   1   4  -5   27.84    2.03 
   1  -4  -5   31.95    2.56 
  -1  -4   5   24.25    2.16 
   1  -4  -5   31.36    2.28 
   1   4  -5   30.64    2.06 
   1  -4  -5   32.01    2.20 
   1  -4  -5   32.08    2.62 
   1   4  -5   33.30    2.15 
   1   4  -5   29.95    1.99 
   1   4  -5   34.50    2.28 
   1  -4  -5   33.76    2.65 
   1   4  -5   29.51    2.01 
   1   4  -5   35.69    2.33 
   1   4  -5   33.36    2.25 
   1  -4  -5   31.01    2.31 
   1  -4  -5   32.53    2.47 
   1   4  -4  127.07   11.73 
  -1   4   4  116.94   10.65 
  -1  -4   4  133.41   13.45 
   1  -4  -4  137.08   12.68 
  -1  -4   4  128.55   12.09 
   1  -4  -4  139.67   13.34 
  -1   4   4  126.36   11.41 
   1   4  -4  134.00   12.10 
  -1  -4   4  143.18   13.51 
  -1   4   4  126.76   11.80 
   1   4  -4  133.19   12.03 
  -1  -4   4  135.03   13.02 
   1  -4  -4  130.84   12.08 
   1  -4  -4  143.39   13.52 
   1  -4  -4  137.44   13.35 
   1  -4  -4  139.29   13.75 
   1   4  -4  127.65   11.50 
  -1  -4   4  126.18   12.03 
  -1   4   4  109.03    9.85 
   1   4  -4  129.07   11.60 
   1  -4  -4  153.86   14.01 
  -1  -4   4  130.24   12.46 
   1  -4  -4  142.55   13.99 
   1   4  -4  129.10   11.84 
  -1  -4   4  156.81   14.76 
   1  -4  -4  132.74   12.72 
   1  -4  -4  147.65   14.01 
   1   4  -4  130.94   11.92 
   1   4  -4  132.73   12.07 
   1   4  -4  143.58   12.87 
   1  -4  -4  144.72   13.44 
   1   4  -4  129.75   11.71 
   1   4  -4  141.11   12.76 
   1   4  -4  142.24   12.86 
   1  -4  -4  134.31   12.91 
   1  -4  -4  147.90   13.94 
  -1   4   3  647.97   47.34 
   1   4  -3  669.23   48.26 
  -1  -4   3  664.79   51.83 
   1  -4  -3  710.56   53.56 
  -1  -4   3  658.92   52.56 
   1  -4  -3  699.45   61.37 
  -1   4   3  687.12   49.02 
   1   4  -3  638.73   49.23 
  -1  -4   3  740.77   54.39 
  -1   4   3  762.14   54.08 
   1   4  -3  776.29   55.28 
  -1  -4   3  741.21   59.48 
   1  -4  -3  666.79   49.84 
   1  -4  -3  735.17   60.04 
   1  -4  -3  731.92   58.81 
   1  -4  -3  759.36   65.22 
   1   4  -3  700.21   50.18 
  -1   4   3  638.80   45.71 
  -1  -4   3  673.84   50.47 
  -1   4   3  678.04   47.93 
   1   4  -3  692.03   49.05 
   1  -4  -3  756.69   56.89 
  -1  -4   3  679.18   50.47 
   1  -4  -3  742.77   57.92 
   1   4  -3  703.82   50.27 
  -1  -4   3  829.16   62.99 
   1  -4  -3  638.63   52.12 
   1  -4  -3  767.58   58.08 
   1   4  -3  746.57   52.83 
   1   4  -3  645.66   46.60 
   1   4  -3  790.26   55.93 
   1  -4  -3  750.62   57.37 
   1   4  -3  689.93   49.06 
   1   4  -3  662.93   48.78 
   1   4  -3  772.23   56.41 
   1   4  -3  702.20   50.01 
   1  -4  -3  770.99   55.74 
   1  -4  -3  781.53   62.65 
  -1   4   2  140.40   10.32 
   1   4  -2  138.35   10.30 
   1  -4  -2  149.41   11.22 
  -1  -4   2  128.12   10.48 
  -1  -4   2  131.04   11.42 
   1  -4  -2  141.08   10.84 
  -1   4   2  131.45    9.77 
   1   4  -2  130.98    9.89 
  -1  -4   2  139.48   10.47 
  -1   4   2  133.88   10.34 
   1   4  -2  133.17   10.16 
   1   4  -2  130.92    9.40 
  -1  -4   2  142.81   10.88 
   1  -4  -2  163.71   12.02 
  -1  -4   2  129.07   10.43 
   1  -4  -2  149.10   12.64 
   1  -4  -2  143.78   11.59 
   1  -4  -2  141.15   12.47 
  -1   4   2  127.91    9.26 
  -1  -4   2  139.39   10.29 
  -1   4   2  126.80    9.04 
   1   4  -2  134.09    9.52 
   1  -4  -2  151.45   11.01 
  -1  -4   2  132.01    9.74 
   1   4  -2  135.71    9.83 
  -1  -4   2  145.50   10.95 
   1  -4  -2  141.06   10.32 
   1   4  -2  148.22   10.50 
   1  -4  -2  138.15   10.72 
   1  -4  -2  153.41   10.97 
   1  -4  -2  145.35   11.26 
  -1   4   1 1131.78   81.55 
   1   4  -1 1203.11   85.94 
   1  -4  -1 1233.59   98.37 
  -1  -4   1 1212.18   95.85 
   1  -4  -1 1097.77   87.38 
  -1  -4   1 1073.54   84.49 
  -1   4   1  969.39   72.99 
   1   4  -1 1071.52   74.47 
  -1  -4   1 1062.80   76.37 
  -1   4   1 1178.02   82.43 
   1   4  -1 1010.14   73.13 
  -1   4   1 1026.50   74.05 
   1   4  -1 1068.21   74.82 
  -1  -4   1 1064.90   82.70 
   1  -4  -1 1162.42   87.30 
   1  -4  -1 1102.35   90.74 
  -1  -4   1 1024.77   85.65 
   1  -4  -1 1124.85   86.99 
  -1  -4   1  999.95   75.90 
   1   4  -1 1026.84   72.34 
   1  -4  -1 1128.35   95.69 
  -1   4   1 1054.89   74.89 
  -1   4   1  914.80   63.35 
   1   4  -1 1035.70   71.75 
   1  -4  -1 1120.14   79.89 
  -1  -4   1 1159.32   83.62 
   1   4  -1 1011.05   70.63 
  -1  -4   1 1121.38   88.55 
   1  -4  -1  978.05   73.85 
   1  -4  -1 1224.30   85.54 
   1  -4  -1 1108.22   85.59 
  -1   4   0  560.12   39.52 
   1   4   0  578.25   41.52 
   1  -4   0  614.89   44.75 
  -1  -4   0  579.31   45.70 
   1  -4   0  579.60   44.10 
  -1  -4   0  569.71   48.31 
  -1   4   0  506.26   36.79 
   1   4   0  551.57   38.39 
  -1  -4   0  527.60   38.85 
  -1   4   0  454.18   33.76 
   1   4   0  521.99   37.98 
  -1   4   0  579.48   41.09 
   1  -4   0  541.64   40.06 
  -1  -4   0  550.77   42.71 
   1  -4   0  461.47   44.61 
  -1  -4   0  539.16   41.61 
   1  -4   0  552.07   44.63 
  -1  -4   0  532.94   46.05 
   1   4   0  542.62   40.70 
   1  -4   0  551.02   44.48 
  -1   4   0  538.51   38.05 
   1   4   0  557.38   39.54 
  -1   4   0  545.23   37.79 
   1   4   0  469.65   34.23 
  -1  -4   0  443.16   31.03 
  -1  -4   0  555.35   41.12 
   1   4   0  464.14   34.19 
  -1   4   0  503.82   37.11 
   1  -4   0  546.71   39.03 
   1  -4   0  352.89   41.56 
  -1   4  -1  293.92   21.36 
   1   4   1  278.04   20.32 
   1  -4   1  302.89   23.03 
  -1  -4  -1  291.04   22.06 
   1  -4   1  299.27   23.71 
  -1  -4  -1  276.95   22.46 
  -1   4  -1  271.94   19.34 
   1   4   1  234.27   18.30 
  -1  -4  -1  272.38   19.58 
  -1   4  -1  275.62   20.32 
  -1   4  -1  220.30   16.25 
   1   4   1  286.54   20.39 
  -1   4  -1  284.77   20.25 
   1  -4   1  270.06   20.57 
  -1  -4  -1  273.01   21.34 
   1  -4   1  275.14   21.74 
   1  -4   1  266.83   20.63 
  -1  -4  -1  256.58   21.02 
   1   4   1  270.47   20.80 
   1  -4   1  259.70   20.66 
   1   4   1  270.82   19.87 
   1   4   1  221.43   15.80 
  -1  -4  -1  291.17   22.70 
  -1  -4  -1  282.72   22.80 
  -1  -4  -1  305.26   22.21 
   1   4   1  264.13   18.69 
  -1   4  -1  285.14   20.74 
  -1  -4  -1  243.63   17.52 
  -1   4  -1  250.91   17.74 
  -1   4  -1  254.60   18.22 
   1  -4   1  281.49   21.28 
  -1  -4  -1  273.87   20.46 
  -1   4  -2   33.45    2.54 
   1   4   2   33.67    2.67 
   1  -4   2   30.48    2.51 
  -1  -4  -2   35.45    3.06 
   1  -4   2   30.69    2.69 
  -1  -4  -2   33.00    2.95 
  -1   4  -2   30.16    2.35 
   1   4   2   25.54    1.99 
  -1   4  -2   33.99    2.56 
   1   4   2   30.38    2.39 
  -1   4  -2   32.94    2.50 
   1  -4   2   26.86    2.34 
  -1  -4  -2   30.81    2.59 
  -1  -4  -2   28.02    2.55 
   1  -4   2   29.18    2.54 
   1   4   2   30.11    2.47 
  -1   4  -2   28.69    2.13 
   1   4   2   28.44    2.11 
   1  -4   2   26.48    2.07 
  -1   4  -2   24.45    1.80 
  -1  -4  -2   29.17    2.31 
   1  -4   2   26.87    2.48 
  -1  -4  -2   29.57    2.45 
  -1  -4  -2   24.69    1.91 
  -1   4  -2   24.04    1.81 
   1  -4   2   25.49    2.19 
  -1  -4  -2   27.09    2.19 
  -1  -4  -2   24.86    2.13 
   1   4   2   20.60    1.54 
  -1   4  -2   24.39    1.80 
  -1   4  -2   23.87    1.83 
  -1  -4  -2   25.13    1.96 
  -1   4  -2   24.31    1.81 
  -1  -4  -2   27.04    2.13 
  -1   4  -2   24.75    1.85 
   1  -4   2   20.92    1.84 
  -1  -4  -2   23.90    1.93 
  -1   4  -3  373.00   33.83 
   1   4   3  414.53   38.85 
   1  -4   3  363.53   34.42 
  -1  -4  -3  383.25   36.61 
   1  -4   3  371.66   36.44 
  -1  -4  -3  414.40   39.99 
  -1   4  -3  353.93   31.69 
  -1   4  -3  381.08   34.86 
   1   4   3  329.42   29.50 
  -1   4  -3  409.28   36.69 
   1  -4   3  394.90   36.91 
  -1  -4  -3  387.10   36.03 
   1  -4   3  395.56   37.75 
  -1  -4  -3  406.94   39.04 
   1  -4   3  354.67   32.60 
  -1  -4  -3  383.14   37.39 
   1   4   3  374.07   35.33 
  -1   4  -3  380.26   34.40 
   1   4   3  321.49   29.57 
   1  -4   3  351.84   32.90 
  -1  -4  -3  340.84   32.00 
  -1   4  -3  326.91   29.93 
  -1  -4  -3  440.16   39.94 
   1  -4   3  432.47   40.28 
  -1  -4  -3  391.42   38.86 
  -1   4  -3  358.10   32.45 
  -1  -4  -3  411.03   38.00 
  -1   4  -3  406.07   36.80 
  -1  -4  -3  436.85   39.40 
   1   4   3  339.20   30.37 
  -1   4  -3  364.92   32.64 
  -1   4  -3  436.38   39.03 
  -1  -4  -3  386.29   35.31 
  -1   4  -3  389.66   34.88 
  -1   4  -3  388.07   35.20 
  -1  -4  -3  406.96   37.33 
  -1   4  -3  391.97   35.45 
  -1  -4  -3  334.32   29.91 
   1  -4   3  360.07   33.87 
  -1  -4  -3  395.68   37.57 
  -1  -4  -4  789.92   50.71 
  -1   4  -4  781.53   49.53 
   1   4   4  779.25   50.27 
   1  -4   4  790.93   53.36 
   1  -4   4  851.43   58.08 
  -1  -4  -4  886.12   59.53 
  -1   4  -4  888.43   55.33 
  -1   4  -4  835.43   53.42 
   1   4   4  847.18   53.30 
  -1   4  -4  897.43   55.95 
   1  -4   4  907.28   63.72 
  -1  -4  -4  836.10   58.42 
   1  -4   4  817.43   55.99 
  -1  -4  -4  856.19   63.35 
  -1  -4  -4  881.64   69.24 
   1   4   4  847.32   57.19 
  -1   4  -4  832.41   52.69 
   1  -4   4  806.13   54.28 
  -1   4  -4  904.93   56.40 
  -1  -4  -4 1043.23   65.51 
   1  -4   4  994.14   69.19 
  -1  -4  -4  885.04   61.70 
  -1  -4  -4  892.01   55.79 
  -1   4  -4  865.09   55.01 
  -1  -4  -4  939.43   64.86 
  -1   4  -4  907.75   59.08 
  -1  -4  -4  954.26   66.07 
  -1   4  -4  911.69   56.74 
  -1   4  -4  297.78  148.02 
  -1  -4  -4  885.34   62.98 
  -1   4  -4  771.97   48.11 
  -1   4  -4  913.56   58.27 
  -1  -4  -4  842.99   61.61 
  -1   4  -4  879.40   56.36 
   1   4   4  786.12   49.22 
   1  -4   4  841.77   56.53 
  -1  -4  -4  914.74   66.10 
  -1   4  -5   49.76    3.78 
   1  -4   5   50.80    4.12 
   1  -4   5   50.15    4.07 
  -1  -4  -5   47.87    3.88 
  -1   4  -5   53.57    3.96 
  -1   4  -5   52.84    4.10 
   1   4   5   51.75    3.94 
  -1   4  -5   55.18    4.20 
   1  -4   5   50.38    4.34 
  -1  -4  -5   50.44    3.96 
   1  -4   5   49.93    3.94 
  -1  -4  -5   54.77    4.51 
   1   4   5   50.12    4.31 
   1   4   5   51.93    4.53 
  -1   4  -5   46.57    3.45 
   1  -4   5   46.80    3.69 
  -1   4  -5   52.23    3.81 
  -1  -4  -5   52.66    4.37 
   1  -4   5   61.70    4.75 
  -1  -4  -5   50.74    3.99 
  -1   4  -5   51.03    3.78 
  -1  -4  -5   53.81    4.17 
  -1   4  -5   51.59    3.87 
  -1  -4  -5   56.40    4.35 
  -1   4  -5   51.55    3.76 
  -1   4  -5   62.41    4.57 
  -1  -4  -5   55.39    4.15 
  -1   4  -5   51.17    3.74 
  -1   4  -5   54.75    4.07 
  -1  -4  -5   51.40    4.05 
  -1   4  -5   51.50    3.88 
   1   4   5   47.28    3.52 
   1  -4   5   48.00    3.69 
  -1  -4  -5   58.88    4.66 
   1  -4   6   16.82    2.02 
  -1  -4  -6   15.98    1.91 
  -1   4  -6   17.30    1.83 
   1   4   6   15.78    1.70 
  -1   4  -6   15.34    1.62 
   1  -4   6   17.83    2.46 
  -1  -4  -6   16.39    1.89 
  -1  -4  -6   16.43    2.23 
   1   4   6   15.21    2.08 
   1   4   6   17.54    1.92 
  -1   4  -6   13.34    1.50 
  -1  -4  -6   15.02    1.61 
   1  -4   6   18.93    2.05 
  -1  -4  -6   17.04    2.14 
  -1   4  -6   15.33    1.55 
  -1  -4  -6   17.57    1.70 
  -1   4  -6   17.14    1.73 
  -1  -4  -6   16.69    1.84 
  -1   4  -6   16.49    1.70 
  -1   4  -6   15.37    1.44 
  -1  -4  -6   18.03    1.99 
  -1   4  -6   16.89    1.61 
  -1   4  -6   15.38    1.54 
  -1  -4  -6   17.21    1.76 
  -1   4  -6   22.09    2.05 
   1   4   6   14.29    1.30 
   1  -4   6   15.93    1.76 
  -1  -4  -6   18.05    2.00 
  -1  -4  -7    3.11    0.90 
   1  -4   7    2.74    1.10 
  -1  -4  -7    2.36    1.01 
  -1   4  -7    2.48    0.96 
  -1  -4  -7    3.21    1.59 
  -1   4  -7    3.22    1.22 
  -1  -4  -7    4.29    1.31 
  -1   4  -7    3.42    0.79 
  -1   4  -7    3.09    0.87 
  -1  -4  -7    3.24    1.32 
  -1   4  -7    2.92    0.87 
  -1   4  -7    2.29    1.06 
  -1  -4  -7    2.76    1.15 
  -1   4  -7    3.68    0.97 
  -1  -4  -7    3.21    1.65 
   1   4   8   41.41    3.60 
   1  -4   8   44.04    4.14 
  -1  -4  -8   43.54    3.88 
  -1   4  -8   46.10    4.07 
  -1  -4  -8   44.84    3.97 
  -1   4  -8   45.32    3.97 
  -1  -4  -8   45.36    4.35 
  -1   4  -8   36.70    3.26 
  -1   4  -8   51.46    4.45 
  -1  -4  -8   42.51    4.03 
  -1   4  -8   41.62    3.71 
  -1   4  -8   45.55    4.00 
  -1  -4  -8   43.05    4.01 
  -1   4  -8   47.01    4.20 
  -1  -4  -8   44.32    4.12 
   1  -4   9   37.55    5.41 
  -1  -4  -9   44.45    5.92 
  -1   4  -9   39.23    5.23 
   1  -4   9   37.91    5.44 
  -1  -4  -9   41.23    5.49 
   1   4   9   29.81    4.27 
  -1   4  -9   43.67    5.77 
  -1  -4  -9   33.75    4.86 
  -1   4  -9   39.93    5.30 
  -1   4  -9   37.49    5.27 
  -1  -4  -9   41.70    5.53 
  -1   4  -9   35.56    5.02 
  -1  -4  -9   34.17    4.85 
   1   5 -10    4.31    1.11 
   1  -5 -10    4.05    1.20 
   1   5 -10    4.01    1.06 
   1  -5 -10    4.55    1.33 
   1   5 -10    3.83    1.02 
   1   5 -10    4.78    1.12 
  -1  -5  10    5.87    1.34 
   1  -5 -10    4.62    1.29 
   1  -5  -9   35.37    2.80 
   1  -5  -9   39.51    3.02 
   1   5  -9   35.19    2.69 
  -1  -5   9   37.23    3.15 
   1  -5  -9   38.78    2.91 
   1  -5  -9   34.00    2.78 
   1   5  -9   29.57    3.45 
   1   5  -9   40.23    3.03 
   1  -5  -9   37.68    3.13 
   1   5  -9   33.57    2.61 
   1   5  -9   35.66    2.72 
   1   5  -9   33.45    2.66 
   1  -5  -9   36.67    2.93 
   1   5  -8  267.93   22.79 
   1  -5  -8  264.16   23.47 
   1  -5  -8  252.42   21.92 
   1   5  -8  258.83   22.16 
  -1  -5   8  222.64   22.79 
   1  -5  -8  271.89   23.25 
   1  -5  -8  243.18   21.37 
   1   5  -8  257.13   22.20 
   1   5  -8  278.98   23.85 
   1  -5  -8  244.50   21.00 
   1   5  -8  253.50   22.20 
   1   5  -8  236.45   20.37 
   1   5  -8  281.17   24.20 
  -1   5   8  214.49   18.49 
   1  -5  -8  249.69   22.11 
   1   5  -7  115.41    7.75 
   1  -5  -7  110.39    8.04 
  -1  -5   7  100.56    7.21 
   1  -5  -7  104.32    7.40 
   1   5  -7  106.50    7.39 
  -1  -5   7  117.42    8.66 
   1  -5  -7  113.82    7.83 
   1  -5  -7   94.71    7.11 
   1   5  -7  105.21    7.19 
   1   5  -7  117.89    7.95 
   1  -5  -7  108.04    7.43 
   1   5  -7  105.20    7.17 
   1   5  -7  103.94    7.15 
   1   5  -7  109.83    7.69 
   1  -5  -7  112.88    8.01 
   1  -5  -7  102.35    7.32 
   1  -5  -6  245.66   20.17 
   1   5  -6  280.47   22.35 
  -1  -5   6  255.74   20.71 
  -1   5   6  274.22   21.87 
  -1  -5   6  292.92   24.07 
   1  -5  -6  261.77   21.20 
   1  -5  -6  255.25   21.13 
  -1   5   6  250.32   20.50 
   1   5  -6  276.56   22.98 
   1  -5  -6  269.67   23.15 
  -1  -5   6  269.76   22.00 
   1  -5  -6  285.55   24.03 
   1   5  -6  283.85   23.17 
  -1  -5   6  295.84   25.27 
   1  -5  -6  288.29   23.26 
   1  -5  -6  282.24   23.86 
  -1   5   6  240.35   19.62 
   1   5  -6  184.99   20.34 
   1   5  -6  272.10   22.21 
   1   5  -6  300.37   24.43 
   1  -5  -6  281.74   23.04 
   1   5  -6  277.91   22.79 
   1   5  -6  279.70   22.69 
   1   5  -6  282.27   23.00 
   1  -5  -6  319.95   25.69 
   1  -5  -6  275.62   23.69 
   1   5  -5   49.88    5.39 
  -1  -5   5   49.09    5.66 
   1  -5  -5   57.66    6.40 
   1   5  -5   46.95    5.14 
  -1  -5   5   50.32    5.60 
  -1   5   5   52.06    5.65 
   1   5  -5   52.57    5.74 
  -1  -5   5   50.74    6.06 
   1  -5  -5   56.97    6.33 
   1  -5  -5   52.22    5.90 
   1  -5  -5   47.60    5.43 
   1   5  -5   50.63    5.42 
  -1  -5   5   51.49    5.71 
   1   5  -5   53.09    5.63 
   1  -5  -5   56.89    6.17 
  -1  -5   5   46.40    5.06 
   1  -5  -5   51.53    5.80 
   1   5  -5   46.58    4.98 
  -1  -5   5   52.12    5.87 
   1  -5  -5   52.33    5.65 
   1  -5  -5   51.61    5.94 
  -1   5   5   39.72    4.24 
   1   5  -5   50.69    5.39 
   1   5  -5   48.69    5.25 
   1   5  -5   29.60    7.22 
   1  -5  -5   47.08    5.34 
   1   5  -5   45.79    5.00 
   1   5  -5   44.13    4.74 
   1   5  -5   47.71    5.23 
   1  -5  -5   58.01    6.22 
   1  -5  -5   48.86    5.64 
   1   5  -4  484.64   41.49 
  -1  -5   4  477.73   42.16 
   1  -5  -4  480.65   42.64 
  -1  -5   4  493.82   43.11 
   1  -5  -4  507.99   44.61 
  -1   5   4  494.91   41.83 
   1   5  -4  462.83   40.42 
  -1  -5   4  517.40   44.41 
  -1   5   4  479.65   44.48 
   1   5  -4  531.96   45.41 
  -1  -5   4  510.88   45.02 
   1  -5  -4  515.05   46.15 
   1  -5  -4  497.74   43.75 
   1  -5  -4  507.25   47.34 
   1   5  -4  505.68   43.52 
  -1  -5   4  507.27   44.85 
  -1   5   4  459.51   38.82 
   1   5  -4  562.67   47.52 
   1  -5  -4  564.41   48.81 
  -1  -5   4  497.03   43.89 
   1  -5  -4  537.44   47.57 
   1   5  -4  495.67   42.33 
  -1  -5   4  560.56   51.29 
   1  -5  -4  524.41   47.53 
   1  -5  -4  535.99   49.69 
  -1   5   4  449.54   38.13 
   1   5  -4  503.21   43.80 
   1   5  -4  503.18   43.16 
   1   5  -4  501.20   50.43 
   1  -5  -4  516.94   44.81 
   1   5  -4  544.32   46.63 
   1   5  -4  505.55   43.42 
   1   5  -4  525.32   45.37 
   1  -5  -4  550.85   51.63 
   1  -5  -4  547.58   49.45 
   1   5  -3  229.09   15.06 
  -1   5   3  206.32   13.79 
  -1  -5   3  226.59   16.65 
   1  -5  -3  228.92   15.70 
  -1  -5   3  224.85   15.71 
   1  -5  -3  218.21   15.54 
  -1   5   3  222.00   13.95 
   1   5  -3  212.35   14.04 
  -1  -5   3  230.60   15.26 
  -1   5   3  246.40   15.50 
   1   5  -3  232.45   15.09 
  -1  -5   3  241.28   16.87 
   1  -5  -3  216.72   14.09 
   1  -5  -3  230.94   16.54 
   1  -5  -3  228.11   16.47 
   1   5  -3  236.06   15.04 
  -1   5   3  206.35   13.23 
  -1  -5   3  231.95   15.95 
   1  -5  -3  226.59   15.11 
  -1   5   3  206.09   12.89 
   1   5  -3  229.56   14.45 
   1  -5  -3  203.61   17.87 
  -1  -5   3  233.52   15.45 
   1  -5  -3  240.65   17.07 
   1   5  -3  230.08   14.56 
  -1  -5   3  255.75   17.57 
   1  -5  -3  242.36   16.10 
   1  -5  -3  233.14   16.13 
  -1   5   3  194.34   12.56 
   1   5  -3  225.87   14.67 
   1   5  -3  213.97   13.65 
   1   5  -3  262.86   16.43 
   1  -5  -3  238.04   15.87 
   1   5  -3  223.28   14.43 
   1   5  -3  245.58   15.48 
  -1  -5   3  253.25   17.87 
   1   5  -3  264.49   16.55 
   1  -5  -3  268.27   17.13 
   1  -5  -3  245.22   18.38 
   1   5  -2  286.51   26.15 
   1  -5  -2  278.61   25.85 
  -1  -5   2  277.87   25.99 
  -1  -5   2  262.74   24.87 
   1  -5  -2  286.33   27.22 
  -1   5   2  255.95   23.82 
   1   5  -2  297.18   26.71 
  -1  -5   2  284.08   26.01 
  -1   5   2  269.19   25.56 
   1   5  -2  297.93   26.83 
   1   5  -2  277.47   25.43 
  -1  -5   2  281.19   26.05 
   1  -5  -2  284.38   25.83 
   1  -5  -2  272.10   25.43 
   1  -5  -2  295.17   28.54 
   1  -5  -2  279.85   26.50 
  -1   5   2  282.62   25.88 
   1   5  -2  295.62   27.16 
   1  -5  -2  289.30   27.88 
  -1  -5   2  311.88   29.74 
  -1   5   2  283.02   25.61 
   1   5  -2  269.24   25.31 
   1  -5  -2  277.00   25.67 
  -1  -5   2  281.24   26.47 
   1  -5  -2  293.89   28.39 
   1   5  -2  286.30   25.83 
  -1  -5   2  300.13   28.52 
   1  -5  -2  285.14   26.61 
   1  -5  -2  260.21   24.03 
  -1   5   2  275.59   24.90 
   1   5  -2  296.24   26.67 
   1   5  -2  319.13   28.60 
   1  -5  -2  275.64   25.26 
  -1  -5   2  349.61   32.13 
   1   5  -2  280.29   25.09 
   1  -5  -2  336.97   30.44 
   1  -5  -2  283.53   26.72 
  -1   5   1  599.51   54.51 
   1   5  -1  528.96   48.24 
   1  -5  -1  568.08   54.14 
  -1  -5   1  576.01   54.69 
   1  -5  -1  544.49   54.03 
  -1  -5   1  582.60   55.76 
  -1   5   1  526.15   47.23 
   1   5  -1  462.49   41.45 
  -1   5   1  527.15   48.37 
   1   5  -1  527.58   47.89 
  -1  -5   1  520.43   48.49 
   1  -5  -1  544.76   50.35 
   1  -5  -1  517.93   50.16 
  -1  -5   1  502.68   46.80 
   1  -5  -1  547.81   53.37 
   1  -5  -1  517.13   49.18 
  -1   5   1  571.58   52.46 
   1   5  -1  510.65   47.15 
   1  -5  -1  577.09   56.56 
  -1  -5   1  600.50   56.41 
  -1   5   1  571.88   51.19 
   1   5  -1  552.48   49.46 
   1   5  -1  515.27   46.14 
   1  -5  -1  471.52   46.58 
   1  -5  -1  583.11   54.72 
  -1  -5   1  551.06   51.55 
  -1  -5   1  485.65   43.81 
  -1  -5   1  557.84   52.19 
   1  -5  -1  541.15   49.69 
   1  -5  -1  466.14   43.51 
  -1   5   1  516.78   46.30 
   1   5  -1  521.98   46.79 
  -1   5   1  558.40   49.98 
   1   5  -1  444.81   45.18 
   1  -5  -1  421.58   42.11 
  -1  -5   1  556.98   50.99 
   1  -5  -1  520.18   47.30 
   1   5  -1  486.65   45.39 
   1  -5  -1  464.15   42.59 
   1  -5  -1  540.44   51.04 
  -1   5   0 1616.30  147.73 
   1   5   0 1557.85  141.33 
   1  -5   0 1409.51  143.22 
  -1  -5   0 1495.73  138.54 
   1  -5   0 1437.94  135.87 
  -1   5   0 1451.53  132.19 
   1   5   0 1421.06  128.32 
  -1   5   0 1270.75  120.74 
   1   5   0 1563.20  140.20 
   1  -5   0 1476.22  135.13 
  -1  -5   0 1497.04  139.33 
   1  -5   0 1497.04  147.19 
  -1  -5   0 1420.93  136.63 
   1  -5   0 1511.65  144.65 
  -1  -5   0 1360.55  128.75 
   1  -5   0 1363.88  128.59 
  -1   5   0 1524.32  139.39 
   1   5   0 1623.89  148.65 
   1  -5   0 1620.26  156.43 
  -1  -5   0 1623.47  158.44 
  -1   5   0 1545.15  138.69 
   1   5   0 1375.26  125.87 
  -1  -5   0 1282.32  114.66 
   1  -5   0 1649.05  154.23 
  -1  -5   0 1497.83  141.57 
  -1  -5   0 1386.68  125.02 
   1  -5   0 1575.29  145.36 
  -1  -5   0 1637.73  152.04 
  -1   5   0 1340.97  123.98 
   1   5   0 1518.33  136.02 
  -1   5   0 1677.05  150.07 
   1  -5   0 1343.76  121.86 
   1  -5   0 1377.17  124.69 
  -1  -5   0 1409.60  130.10 
   1   5   0 1371.83  122.72 
   1  -5   0 1529.63  144.00 
  -1  -5   0 1361.00  125.22 
  -1   5  -1  497.44   45.25 
   1   5   1  559.43   51.80 
   1  -5   1  501.89   48.12 
  -1  -5  -1  533.79   50.34 
   1  -5   1  526.81   49.88 
  -1  -5  -1  521.43   49.70 
  -1   5  -1  503.65   45.19 
   1   5   1  456.99   42.39 
   1   5   1  539.27   48.39 
  -1   5  -1  468.46   42.25 
  -1   5  -1  530.10   47.46 
   1  -5   1  477.13   43.80 
  -1  -5  -1  513.37   47.59 
   1  -5   1  488.40   46.30 
  -1  -5  -1  498.40   47.44 
   1  -5   1  472.23   43.85 
  -1  -5  -1  475.70   46.25 
   1   5   1  501.87   45.73 
  -1   5  -1  531.57   47.99 
   1   5   1  520.04   47.61 
   1  -5   1  534.74   49.83 
  -1  -5  -1  514.77   48.92 
  -1   5  -1  490.69   45.20 
   1   5   1  424.95   40.34 
  -1  -5  -1  531.88   51.52 
   1  -5   1  550.17   52.67 
  -1  -5  -1  516.39   48.70 
   1  -5   1  527.31   49.21 
  -1  -5  -1  502.84   46.81 
  -1  -5  -1  478.57   45.39 
  -1   5  -1  515.25   46.16 
   1   5   1  463.26   42.48 
  -1   5  -1  534.88   48.97 
  -1  -5  -1  438.12   39.94 
   1  -5   1  597.44   54.15 
  -1  -5  -1  548.44   50.50 
   1   5   1  520.83   46.62 
  -1   5  -1  418.53   37.97 
   1  -5   1  501.98   46.16 
  -1  -5  -1  486.05   44.94 
  -1   5  -2  249.33   18.28 
   1   5   2  253.95   18.90 
   1  -5   2  246.83   19.04 
  -1  -5  -2  243.89   18.72 
   1  -5   2  268.37   20.97 
  -1  -5  -2  261.47   18.04 
   1   5   2  212.97   15.28 
  -1   5  -2  223.30   15.22 
   1   5   2  218.18   13.66 
  -1   5  -2  279.80   20.08 
   1  -5   2  258.97   19.42 
  -1  -5  -2  264.95   19.54 
   1  -5   2  244.42   18.82 
  -1  -5  -2  246.39   19.25 
  -1  -5  -2  241.17   18.54 
   1   5   2  244.09   18.54 
  -1   5  -2  262.31   19.03 
   1   5   2  253.90   16.61 
   1  -5   2  254.37   20.14 
  -1  -5  -2  257.23   19.92 
  -1   5  -2  270.18   16.86 
  -1  -5  -2  278.87   20.43 
   1  -5   2  267.89   21.12 
  -1  -5  -2  262.04   20.33 
   1  -5   2  252.77   20.88 
  -1  -5  -2  263.35   20.84 
  -1  -5  -2  254.76   18.91 
   1   5   2  250.29   17.93 
  -1   5  -2  249.71   17.97 
  -1   5  -2  235.86   17.04 
  -1   5  -2  297.87   21.32 
  -1  -5  -2  232.79   17.12 
  -1   5  -2  248.27   18.49 
   1  -5   2  260.27   19.34 
  -1  -5  -2  267.45   19.63 
   1   5   2  248.44   17.76 
   1  -5   2  236.86   17.89 
  -1  -5  -2  246.15   18.82 
  -1   5  -3  100.65    8.67 
   1   5   3  113.23    9.99 
   1  -5   3  101.07    9.54 
  -1  -5  -3  106.17    9.54 
   1  -5   3  106.50    9.98 
  -1  -5  -3  112.10   10.16 
  -1   5  -3  105.51    9.08 
   1   5   3  103.40    9.18 
  -1   5  -3  122.57   10.42 
   1  -5   3  109.94    9.75 
  -1  -5  -3  120.55   10.62 
   1  -5   3  100.58    8.95 
  -1  -5  -3  112.76   10.39 
  -1  -5  -3  102.30    9.11 
   1   5   3  100.99    8.94 
  -1   5  -3  108.86    9.33 
   1   5   3   99.64    8.66 
   1  -5   3  106.35    9.31 
  -1  -5  -3  102.97    9.00 
  -1   5  -3   96.67    8.27 
  -1  -5  -3  116.85   10.31 
   1  -5   3   99.44   10.40 
  -1  -5  -3  110.00   10.27 
  -1   5  -3   98.13    8.36 
   1  -5   3  120.72   10.67 
  -1  -5  -3  115.47   10.15 
  -1  -5  -3  101.83    9.96 
   1   5   3  104.87    8.90 
  -1   5  -3   99.30    8.42 
  -1   5  -3  108.32    9.22 
  -1   5  -3  114.41    9.71 
  -1  -5  -3  103.85    9.14 
  -1   5  -3  111.17    9.61 
  -1  -5  -3  109.34   10.26 
  -1   5  -3  104.39    8.93 
   1   5   3   92.13    8.12 
   1  -5   3   99.22    8.78 
  -1  -5  -3  108.79   10.08 
  -1   5  -4  293.59   31.10 
   1  -5   4  284.52   30.94 
   1  -5   4  287.06   31.04 
  -1  -5  -4  309.32   33.08 
  -1   5  -4  265.47   28.01 
  -1   5  -4  263.58   27.90 
   1   5   4  320.54   33.78 
   1  -5   4  296.21   31.64 
  -1  -5  -4  295.50   31.31 
   1  -5   4  254.81   27.65 
  -1  -5  -4  276.76   29.79 
   1   5   4  285.48   30.60 
  -1   5  -4  289.64   30.79 
   1  -5   4  280.52   31.06 
  -1   5  -4  303.25   31.97 
  -1  -5  -4  283.70   33.32 
   1  -5   4  321.05   35.04 
  -1  -5  -4  295.92   32.34 
  -1   5  -4  273.98   28.87 
   1  -5   4  329.08   36.15 
  -1  -5  -4  307.09   33.21 
  -1  -5  -4  281.23   32.18 
   1   5   4  235.97   24.79 
  -1   5  -4  305.70   32.15 
  -1   5  -4  246.45   35.79 
  -1  -5  -4  289.35   30.99 
  -1   5  -4  315.89   33.17 
  -1   5  -4  228.23   26.62 
  -1  -5  -4  303.28   32.42 
  -1   5  -4  282.35   29.93 
   1   5   4  284.40   30.28 
   1  -5   4  262.66   28.44 
  -1  -5  -4  282.71   30.94 
  -1   5  -5  100.77    8.14 
   1  -5   5  107.14    9.01 
  -1  -5  -5  113.59    9.29 
  -1   5  -5  108.55    8.90 
  -1   5  -5  102.93    8.41 
   1   5   5  112.67    9.06 
  -1   5  -5  119.99    9.67 
   1  -5   5  113.45    9.48 
  -1  -5  -5  110.19    9.00 
  -1  -5  -5  109.54    9.30 
   1   5   5  103.54    8.69 
   1   5   5  108.42    9.04 
  -1   5  -5  108.99    8.86 
   1  -5   5  108.77    9.29 
  -1   5  -5  117.90    9.72 
  -1  -5  -5  134.09   10.86 
   1  -5   5  118.30   10.35 
  -1  -5  -5  123.14   10.33 
  -1   5  -5  107.58    8.70 
   1  -5   5  121.54   10.68 
  -1  -5  -5  115.88    9.94 
  -1  -5  -5  123.03   10.45 
  -1   5  -5  117.29    9.37 
  -1   5  -5  126.03   10.07 
  -1  -5  -5  109.67    8.83 
  -1   5  -5  120.95    9.70 
  -1   5  -5  112.45    9.10 
  -1  -5  -5  131.20   10.63 
  -1   5  -5  119.64    9.67 
   1   5   5   96.16    7.79 
   1  -5   5   95.07    7.81 
  -1  -5  -5  121.50   10.43 
  -1   5  -6  108.94   11.06 
  -1  -5  -6  146.51   10.72 
   1  -5   6  148.02   10.95 
  -1  -5  -6  142.87   10.11 
  -1   5  -6  134.94    9.20 
   1  -5   6  138.53   12.27 
  -1  -5  -6  147.93   10.38 
  -1  -5  -6  144.96   10.77 
  -1   5  -6  145.35    9.80 
  -1   5  -6  157.77   10.61 
  -1  -5  -6  138.40    9.33 
  -1   5  -6  146.83    9.85 
  -1   5  -6  137.32    9.43 
  -1  -5  -6  160.39   10.94 
  -1   5  -6  143.51    9.80 
   1   5   6  135.73    9.13 
  -1  -5  -6  145.80   10.32 
   1   5   7  389.02   33.31 
   1  -5   7  407.01   35.82 
  -1  -5  -7  384.00   33.55 
  -1   5  -7  352.08   30.10 
   1  -5   7  405.55   36.51 
  -1  -5  -7  438.22   37.60 
  -1  -5  -7  399.25   35.37 
  -1   5  -7  388.51   33.40 
  -1   5  -7  453.81   38.60 
  -1  -5  -7  377.20   32.05 
  -1   5  -7  392.66   33.44 
  -1   5  -7  334.88   30.06 
  -1  -5  -7  419.31   35.81 
  -1   5  -7  367.32   31.61 
  -1  -5  -7  379.65   33.37 
   1   5   8    8.03    0.83 
   1  -5   8    7.11    1.03 
  -1  -5  -8    9.12    1.06 
  -1   5  -8    8.27    0.92 
   1  -5   8    8.36    1.44 
  -1  -5  -8    8.56    1.11 
  -1  -5  -8    8.83    1.17 
  -1   5  -8    7.45    0.94 
  -1   5  -8   10.12    0.99 
  -1  -5  -8    8.00    1.34 
  -1   5  -8    7.52    0.81 
  -1   5  -8    8.38    0.90 
  -1  -5  -8    9.21    0.91 
  -1   5  -8    8.79    0.97 
  -1  -5  -8    7.44    1.12 
  -1  -5  -9   32.53    4.20 
   1  -5   9   29.50    3.98 
  -1  -5  -9   32.88    4.22 
   1   5   9   25.56    3.65 
  -1   5  -9   31.56    4.11 
  -1  -5  -9   24.68    3.55 
  -1   5  -9   31.23    4.03 
  -1   5  -9   30.54    3.92 
  -1   5  -9   32.56    4.18 
  -1  -5  -9   26.84    3.84 
  -1   6   9   34.39    4.41 
   1  -6  -9   38.29    4.93 
   1   6  -9   34.26    4.39 
   1  -6  -9   29.99    3.94 
   1   6  -9   41.66    5.32 
   1  -6  -9   34.08    4.41 
   1   6  -9   33.98    4.36 
  -1  -6   9   22.14    3.74 
   1  -6  -9   34.02    4.41 
   1   6  -8   33.43    2.50 
   1  -6  -8   19.88    2.03 
   1  -6  -8   32.03    2.56 
   1   6  -8   27.75    2.15 
  -1  -6   8   25.48    2.43 
   1  -6  -8   31.03    2.40 
   1  -6  -8   25.62    2.21 
   1   6  -8   29.12    2.28 
   1   6  -8   33.94    2.55 
   1  -6  -8   24.86    2.24 
   1   6  -8   28.67    2.23 
   1   6  -8   24.93    1.97 
  -1  -6   8   25.98    2.36 
   1  -6  -8   22.79    1.93 
   1   6  -7    0.37    0.73 
   1  -6  -7    1.36    0.99 
   1  -6  -7    1.55    1.04 
   1   6  -7    0.76    1.06 
  -1  -6   7    0.91    1.43 
   1  -6  -7    0.60    0.87 
   1  -6  -7    0.42    1.05 
   1   6  -7    0.77    0.91 
   1   6  -7   -0.05    0.78 
   1  -6  -7    0.68    1.25 
   1   6  -7    0.54    0.83 
   1   6  -7   -0.43    0.86 
  -1  -6   7    0.53    1.49 
  -1   6   7   -0.26    0.96 
   1  -6  -7    1.43    1.37 
   1   6  -6  219.66   17.39 
  -1  -6   6  214.47   17.34 
   1   6  -6  257.64   20.35 
   1  -6  -6  190.44   17.48 
  -1  -6   6  166.10   14.12 
   1  -6  -6  242.56   19.83 
   1   6  -6  249.38   19.92 
  -1  -6   6  247.82   21.58 
   1  -6  -6  239.90   19.69 
   1  -6  -6  232.23   20.17 
  -1   6   6  216.52   17.12 
   1   6  -6  231.66   18.59 
   1   6  -6  242.49   19.21 
   1  -6  -6  223.21   18.27 
   1   6  -6  223.00   17.82 
   1   6  -6  215.22   17.22 
  -1  -6   6  250.68   20.62 
  -1   6   6  205.72   16.58 
   1  -6  -6  221.75   18.45 
   1   6  -5  122.01   12.66 
  -1  -6   5  118.86   12.77 
   1   6  -5  131.16   13.53 
   1  -6  -5  126.03   14.15 
  -1  -6   5  115.03   12.11 
   1  -6  -5  127.30   13.41 
   1   6  -5  125.05   12.90 
  -1  -6   5  137.52   14.72 
   1  -6  -5  129.90   13.68 
   1  -6  -5  122.10   13.47 
  -1   6   5  124.69   12.84 
   1   6  -5  127.15   13.17 
   1   6  -5  120.28   12.46 
   1   6  -5  140.42   14.55 
   1  -6  -5  119.49   12.47 
   1   6  -5  124.09   12.92 
   1   6  -5  116.82   12.08 
  -1  -6   5  141.72   14.98 
   1  -6  -5  135.83   15.14 
   1  -6  -5  123.66   13.29 
   1   6  -4  232.28   18.65 
  -1  -6   4  216.05   17.79 
   1  -6  -4  224.69   18.14 
   1   6  -4  246.14   19.64 
  -1   6   4  230.89   18.97 
  -1  -6   4  222.07   18.09 
   1  -6  -4  221.34   19.41 
   1  -6  -4  218.10   17.82 
   1  -6  -4  213.88   17.65 
   1   6  -4  251.82   20.46 
  -1  -6   4  251.29   21.56 
   1   6  -4  251.32   20.45 
   1  -6  -4  266.79   22.76 
  -1  -6   4  240.71   20.00 
   1  -6  -4  254.82   21.85 
   1   6  -4  235.94   18.92 
  -1  -6   4  250.03   22.01 
   1  -6  -4  255.40   20.62 
   1  -6  -4  231.04   19.61 
  -1   6   4  190.73   18.65 
   1   6  -4  248.03   19.78 
   1   6  -4  284.64   22.65 
   1  -6  -4  235.95   19.71 
   1   6  -4  223.91   18.17 
  -1  -6   4  238.14   20.08 
   1  -6  -4  226.57   24.23 
   1  -6  -4  255.44   21.59 
   1   6  -3  111.11    9.30 
  -1   6   3  110.37    9.16 
  -1  -6   3  110.79    9.68 
   1  -6  -3  103.87    8.81 
  -1  -6   3   94.26    8.03 
   1  -6  -3  120.28   10.16 
  -1   6   3   96.76    7.95 
   1   6  -3  107.41    8.89 
  -1   6   3  102.01    8.73 
  -1  -6   3  104.70    9.67 
   1  -6  -3  111.04    9.41 
   1  -6  -3  107.08    9.29 
   1  -6  -3  100.96    8.85 
   1   6  -3  115.82    9.71 
  -1   6   3  108.44    8.90 
  -1  -6   3  116.82   10.43 
   1  -6  -3  114.99    9.60 
  -1   6   3  112.49    9.19 
   1   6  -3  127.45   10.38 
   1  -6  -3  101.38    9.76 
  -1  -6   3  114.32    9.69 
   1  -6  -3  119.15   10.16 
  -1  -6   3  120.23   11.88 
   1  -6  -3  115.28    9.76 
   1  -6  -3  105.06    9.10 
  -1   6   3  101.46   10.02 
   1   6  -3   97.03    9.94 
   1   6  -3  131.37   10.66 
   1  -6  -3  107.95    9.10 
  -1  -6   3  124.87   10.68 
   1   6  -3   80.58    9.62 
   1  -6  -3  132.06   10.77 
   1  -6  -3  112.90    9.79 
  -1   6   2  373.78   27.48 
   1   6  -2  357.26   26.24 
   1  -6  -2  339.87   26.32 
  -1  -6   2  332.72   24.99 
  -1  -6   2  315.31   24.10 
   1  -6  -2  350.38   25.98 
  -1   6   2  321.53   24.24 
   1   6  -2  360.94   25.98 
  -1   6   2  323.16   24.64 
  -1  -6   2  331.19   24.99 
   1  -6  -2  336.90   25.54 
   1  -6  -2  297.89   22.55 
  -1   6   2  380.28   28.23 
   1   6  -2  381.12   28.39 
   1  -6  -2  378.74   30.02 
  -1  -6   2  373.06   30.68 
  -1   6   2  351.17   25.89 
   1   6  -2  381.12   27.38 
   1  -6  -2  341.22   27.56 
  -1  -6   2  344.13   25.63 
   1  -6  -2  374.97   28.52 
  -1  -6   2  326.50   23.93 
  -1  -6   2  383.34   29.03 
   1  -6  -2  370.83   28.00 
   1  -6  -2  320.77   24.69 
  -1   6   2  354.93   25.58 
   1   6  -2  356.11   30.04 
   1   6  -2  340.97   27.78 
   1  -6  -2  319.12   23.96 
  -1  -6   2  378.16   29.57 
   1   6  -2  252.45   25.04 
   1  -6  -2  326.90   23.46 
   1  -6  -2  364.81   28.34 
  -1   6   1  176.22   12.91 
   1   6  -1  200.99   14.85 
   1  -6  -1  175.93   13.61 
  -1  -6   1  182.58   13.93 
  -1  -6   1  158.24   12.33 
   1  -6  -1  163.34   12.42 
  -1   6   1  156.55   11.97 
   1   6  -1  169.48   12.57 
  -1   6   1  155.55   11.83 
   1   6  -1  168.62   12.57 
  -1  -6   1  167.44   12.47 
   1  -6  -1  165.65   12.59 
   1  -6  -1  155.93   11.87 
  -1   6   1  185.01   13.67 
   1   6  -1  188.99   14.39 
   1  -6  -1  192.66   15.27 
  -1  -6   1  189.34   15.52 
  -1   6   1  175.53   12.96 
   1   6  -1  174.37   13.08 
   1  -6  -1  152.46   12.00 
  -1  -6   1  173.34   13.09 
   1  -6  -1  182.01   13.72 
  -1  -6   1  180.19   14.81 
   1  -6  -1  171.64   13.11 
  -1   6   1  170.34   12.54 
   1   6  -1  168.98   13.27 
   1  -6  -1  150.88   11.22 
  -1  -6   1  176.88   13.34 
  -1   6   1  153.90   11.59 
   1   6  -1  175.76   13.21 
   1  -6  -1  170.16   13.17 
  -1   6   0  391.37   28.67 
   1   6   0  389.38   28.51 
   1  -6   0  397.41   30.32 
  -1  -6   0  390.71   29.91 
   1  -6   0  361.12   28.09 
  -1  -6   0  357.16   26.72 
  -1   6   0  361.06   26.50 
   1   6   0  362.68   26.41 
  -1   6   0  373.66   26.85 
   1   6   0  368.04   26.98 
  -1  -6   0  356.22   26.39 
   1  -6   0  361.76   26.89 
  -1   6   0  397.23   29.28 
   1   6   0  395.71   29.51 
   1  -6   0  417.27   32.03 
  -1  -6   0  413.50   32.16 
  -1   6   0  377.84   27.73 
   1   6   0  343.63   26.22 
   1   6   0  335.54   25.54 
   1  -6   0  395.62   30.17 
  -1  -6   0  371.26   28.02 
   1  -6   0  371.58   27.91 
  -1  -6   0  377.01   29.14 
  -1   6   0  334.56   25.65 
   1   6   0  393.38   28.28 
  -1   6   0  183.07   53.10 
   1  -6   0  335.84   24.82 
  -1  -6   0  380.19   28.04 
  -1   6   0  318.18   23.51 
   1   6   0  400.76   28.82 
   1  -6   0  347.78   26.64 
  -1   6  -1  878.57   64.27 
   1   6   1  920.04   67.13 
   1  -6   1  859.77   66.16 
  -1  -6  -1  884.71   65.97 
   1  -6   1  836.89   64.29 
  -1  -6  -1  857.91   65.69 
  -1   6  -1  769.42   59.16 
   1   6   1  869.82   62.37 
   1   6   1  871.62   63.34 
   1  -6   1  828.99   60.55 
  -1  -6  -1  849.71   63.06 
   1  -6   1  761.26   57.95 
  -1  -6  -1  720.83   54.94 
  -1   6  -1  926.81   68.67 
   1   6   1  914.30   68.59 
   1  -6   1  768.45   64.17 
  -1  -6  -1  979.36   75.01 
  -1   6  -1  726.28   77.22 
   1   6   1  769.78   57.11 
   1  -6   1  900.85   69.73 
  -1  -6  -1  857.83   66.23 
   1  -6   1  812.14   66.73 
  -1  -6  -1  910.78   68.68 
  -1   6  -1  804.72   60.60 
   1   6   1  808.08   62.01 
   1  -6   1  611.57   60.63 
  -1  -6  -1  730.06   62.00 
   1   6   1  853.77   62.13 
  -1   6  -1  867.14   62.13 
   1  -6   1  793.69   61.84 
  -1  -6  -1  752.41   57.05 
  -1   6  -2  389.91   32.14 
   1   6   2  403.99   33.23 
   1  -6   2  373.75   32.41 
  -1  -6  -2  376.12   31.27 
   1  -6   2  373.87   31.47 
  -1  -6  -2  371.94   31.11 
  -1   6  -2  364.09   30.32 
   1   6   2  381.20   30.91 
   1  -6   2  349.56   28.77 
  -1  -6  -2  371.95   30.73 
   1  -6   2  364.34   30.54 
  -1   6  -2  405.90   33.65 
   1   6   2  406.57   33.62 
   1  -6   2  409.02   36.50 
  -1  -6  -2  388.51   32.32 
  -1   6  -2  418.70   33.90 
  -1  -6  -2  445.44   36.07 
   1  -6   2  416.53   36.25 
  -1  -6  -2  387.80   32.88 
   1  -6   2  387.68   33.09 
  -1  -6  -2  394.29   33.87 
  -1  -6  -2  349.80   29.83 
   1   6   2  306.00   24.91 
  -1   6  -2  378.22   31.38 
  -1   6  -2  402.67   32.54 
  -1  -6  -2  341.20   27.85 
   1  -6   2  381.98   31.59 
  -1  -6  -2  402.91   33.55 
   1   6   2  359.78   29.22 
   1  -6   2  362.53   30.24 
  -1  -6  -2  363.45   30.65 
  -1  -6  -3  423.19   34.58 
  -1   6  -3  479.19   38.57 
   1  -6   3  457.31   38.04 
   1  -6   3  465.38   38.31 
  -1  -6  -3  458.17   37.19 
  -1   6  -3  485.85   38.65 
   1   6   3  514.47   40.89 
   1  -6   3  437.08   35.31 
  -1  -6  -3  450.09   36.18 
  -1  -6  -3  437.97   35.95 
   1   6   3  420.82   34.22 
   1   6   3  447.99   36.36 
  -1   6  -3  484.75   39.14 
   1   6   3  494.84   39.96 
   1  -6   3  487.84   42.63 
  -1  -6  -3  476.71   38.68 
  -1   6  -3  520.26   41.40 
  -1  -6  -3  509.68   44.45 
   1  -6   3  515.26   43.81 
  -1  -6  -3  483.53   40.79 
   1  -6   3  487.84   45.28 
  -1  -6  -3  505.62   44.19 
  -1  -6  -3  458.30   39.08 
   1   6   3  458.17   37.49 
  -1   6  -3  493.32   39.21 
  -1   6  -3  577.81   45.88 
  -1  -6  -3  441.60   36.19 
  -1   6  -3  492.27   39.14 
   1  -6   3  500.95   41.12 
  -1  -6  -3  504.06   40.91 
   1   6   3  485.33   38.61 
   1  -6   3  417.85   34.64 
  -1  -6  -3  459.32   37.97 
  -1   6  -4  187.59   19.49 
  -1   6  -4  188.74   19.58 
  -1  -6  -4  223.58   23.20 
   1  -6   4  199.91   21.23 
  -1  -6  -4  197.10   20.74 
   1  -6   4  203.32   21.53 
  -1  -6  -4  189.70   19.90 
  -1  -6  -4  177.59   19.44 
   1   6   4  184.69   18.97 
  -1   6  -4  188.80   19.49 
  -1   6  -4   93.45   26.47 
  -1  -6  -4  170.16   17.61 
  -1   6  -4  200.09   20.56 
   1  -6   4  196.74   20.62 
  -1  -6  -4  199.03   20.69 
   1   6   4  183.80   19.01 
  -1  -6  -4  182.13   19.30 
  -1   6  -5  257.42   20.45 
   1  -6   5  253.82   20.68 
  -1   6  -5  255.84   20.29 
   1  -6   5  273.17   23.14 
  -1  -6  -5  239.94   19.76 
   1  -6   5  267.95   22.69 
  -1  -6  -5  264.03   21.67 
  -1  -6  -5  243.28   20.51 
  -1   6  -5  270.01   21.52 
  -1   6  -5  255.89   21.98 
  -1   6  -5  206.56   16.42 
   1  -6   5  236.87   20.46 
  -1  -6  -5  270.72   21.66 
   1   6   5  286.31   22.67 
  -1  -6  -5  232.62   19.11 
  -1   6  -6  121.30   10.08 
   1   6   6  118.14   10.31 
   1  -6   6  105.98    9.77 
  -1  -6  -6  118.46   10.05 
   1  -6   6  117.52   10.55 
  -1  -6  -6  116.48    9.86 
  -1  -6  -6  113.60   10.00 
  -1   6  -6   96.01    8.34 
  -1   6  -6  128.20   11.04 
  -1  -6  -6  111.56    9.33 
  -1   6  -6  125.28   10.40 
   1  -6   6  103.44    9.50 
  -1  -6  -6  113.01    9.45 
   1   6   6  110.67    9.88 
  -1  -6  -6  113.15    9.72 
   1   6   7  244.30   17.96 
   1  -6   7  229.12   17.61 
  -1  -6  -7  246.34   18.25 
   1  -6   7  230.67   30.85 
  -1  -6  -7  244.20   32.15 
  -1  -6  -7  218.34   16.70 
  -1   6  -7  238.13   31.30 
  -1   6  -7  166.99   25.82 
  -1  -6  -7  225.41   29.81 
  -1   6  -7  232.14   30.61 
   1  -6   7  237.08   17.76 
  -1  -6  -7  221.80   16.55 
   1   6   8   41.65    5.31 
  -1  -6  -8   44.84    5.75 
   1  -6   8   41.03    5.35 
  -1  -6  -8   42.22    5.42 
   1   6   8   38.37    5.00 
  -1   6  -8   24.42    4.74 
  -1  -6  -8   39.07    5.08 
  -1   6  -8   40.11    5.14 
  -1  -6  -8   42.49    5.47 
   1   7  -7  133.49   20.57 
   1  -7  -7  171.59   22.60 
  -1  -7   7  157.17   21.60 
   1  -7  -7  145.85   19.16 
   1  -7  -7  150.70   20.05 
   1   7  -7  198.62   26.16 
   1  -7  -7  150.48   19.88 
  -1  -7   7  142.00   19.11 
  -1   7   7  164.11   21.61 
   1  -7  -7  147.95   19.54 
   1   7  -6  173.29   19.54 
   1  -7  -6  229.02   18.01 
   1  -7  -6  225.81   16.69 
  -1  -7   6  184.08   13.54 
  -1  -7   6  229.14   17.33 
   1  -7  -6  223.47   16.33 
   1  -7  -6  204.34   15.06 
  -1   7   6  210.19   15.34 
   1   7  -6  212.11   21.31 
   1   7  -6  176.66   13.02 
  -1  -7   6  206.38   15.78 
  -1   7   6  207.81   15.16 
   1  -7  -6  200.38   15.16 
   1   7  -5  159.47   13.69 
  -1  -7   5  156.25   13.77 
   1   7  -5  176.51   15.02 
   1  -7  -5  155.55   14.22 
   1  -7  -5  157.75   13.89 
  -1  -7   5  142.35   12.29 
  -1  -7   5  159.52   14.45 
   1  -7  -5  161.88   13.92 
   1  -7  -5  141.34   12.49 
  -1   7   5  137.17   12.32 
   1   7  -5  156.97   13.43 
   1   7  -5  165.48   14.44 
   1  -7  -5  142.81   12.45 
  -1  -7   5   98.53    9.42 
  -1   7   5  133.64   11.51 
   1  -7  -5  145.68   12.88 
   1   7  -4   53.01    4.33 
  -1  -7   4   48.55    4.47 
   1   7  -4   51.73    4.44 
  -1  -7   4   49.28    4.09 
   1  -7  -4   53.26    4.59 
  -1  -7   4   48.13    4.51 
   1  -7  -4   51.84    4.31 
   1  -7  -4   45.20    3.77 
  -1   7   4   43.88    4.11 
   1   7  -4   51.20    4.12 
   1   7  -4   52.18    4.24 
   1  -7  -4   45.54    3.84 
  -1  -7   4   46.40    4.13 
  -1   7   4   40.43    3.36 
   1  -7  -4   47.60    4.08 
   1   7  -3  394.21   27.33 
  -1   7   3  372.65   25.33 
  -1  -7   3  392.12   28.14 
   1  -7  -3  371.09   25.19 
  -1   7   3  198.54   32.65 
   1   7  -3  419.65   28.06 
   1  -7  -3  296.37   24.20 
  -1  -7   3  319.43   23.82 
   1  -7  -3  406.11   28.70 
  -1  -7   3  391.82   28.23 
   1  -7  -3  383.26   26.29 
  -1   7   3  255.97   21.19 
   1   7  -3  411.63   27.59 
   1   7  -3  424.81   28.38 
   1  -7  -3  335.91   23.19 
  -1  -7   3  334.56   24.01 
  -1   7   3  306.30   20.49 
   1  -7  -3  338.25   24.98 
  -1   7   2   68.53    4.86 
   1   7  -2   70.10    4.95 
   1  -7  -2   69.71    5.15 
  -1  -7   2   67.20    5.14 
  -1   7   2   69.29    4.73 
   1  -7  -2   57.70    4.32 
  -1  -7   2   61.02    4.66 
   1  -7  -2   74.34    5.65 
  -1  -7   2   53.04    5.41 
   1  -7  -2   56.44    4.40 
  -1   7   2   64.97    4.64 
   1   7  -2   68.95    4.98 
  -1  -7   2   70.21    5.23 
  -1   7   2   61.81    4.21 
   1   7  -2   75.88    5.14 
   1  -7  -2   66.75    5.10 
  -1   7   1   62.32    6.53 
   1   7  -1   62.43    6.60 
   1  -7  -1   65.00    7.09 
  -1  -7   1   64.76    7.08 
  -1   7   1   59.70    6.37 
   1   7  -1   60.37    6.25 
  -1  -7   1   61.78    6.61 
   1  -7  -1   62.76    6.76 
  -1  -7   1   67.53    7.20 
   1  -7  -1   59.01    6.29 
  -1   7   1   68.08    7.07 
   1   7  -1   69.38    7.19 
  -1  -7   1   60.38    6.79 
  -1   7   1   64.31    6.85 
   1   7  -1   48.36    8.34 
   1  -7  -1   62.40    6.64 
  -1   7   0  362.63   37.47 
   1   7   0  356.63   37.23 
   1  -7   0  360.67   38.05 
  -1  -7   0  359.68   38.13 
  -1   7   0  345.24   35.71 
   1   7   0  330.43   34.54 
   1  -7   0  347.72   36.87 
   1  -7   0  335.15   35.43 
  -1  -7   0  352.03   37.16 
  -1   7   0  361.12   37.12 
   1   7   0  300.58   36.78 
  -1   7   0  279.28   32.95 
  -1  -7   0  349.94   36.46 
  -1   7   0  333.63   34.82 
   1   7   0  345.57   36.57 
   1  -7   0  305.36   32.43 
  -1   7  -1   72.72    5.00 
   1   7   1   78.46    5.63 
   1  -7   1   71.94    5.50 
  -1  -7  -1   70.19    6.07 
   1   7   1   62.06    4.60 
   1   7   1   79.12    5.36 
   1  -7   1   72.96    5.72 
  -1  -7  -1   70.10    5.15 
   1  -7   1   74.95    5.66 
  -1  -7  -1   71.44    5.18 
  -1   7  -1   75.21    5.23 
   1   7   1   72.86    5.08 
  -1   7  -1   55.59    6.95 
  -1  -7  -1   70.99    5.10 
   1   7   1   82.01    5.62 
   1  -7   1   65.05    4.76 
  -1   7  -2  399.10   27.40 
   1   7   2  385.19   26.34 
   1  -7   2  402.09   29.99 
  -1  -7  -2  386.05   26.97 
  -1   7  -2  403.15   27.37 
   1   7   2  369.36   26.29 
   1  -7   2  393.83   28.82 
  -1  -7  -2  362.90   26.55 
   1  -7   2  388.28   27.58 
  -1  -7  -2  386.14   28.82 
   1   7   2  383.82   25.74 
  -1   7  -2  400.58   26.81 
  -1   7  -2  341.00   33.64 
  -1  -7  -2  325.91   23.36 
   1   7   2  413.43   27.79 
   1  -7   2  311.08   21.65 
  -1  -7  -2  350.44   24.01 
  -1   7  -3   47.67    4.02 
   1   7   3   48.94    3.94 
   1  -7   3   51.48    4.82 
  -1  -7  -3   48.98    4.04 
  -1   7  -3   31.32    5.25 
   1   7   3   41.07    3.34 
   1  -7   3   49.29    4.26 
  -1  -7  -3   44.65    3.76 
   1  -7   3   50.22    4.34 
  -1  -7  -3   46.98    4.04 
  -1  -7  -3   39.00    3.35 
   1   7   3   41.01    3.37 
  -1   7  -3   43.36    3.65 
  -1   7  -3   50.04    4.05 
   1  -7   3   37.41    3.38 
  -1  -7  -3   45.39    3.83 
   1   7   3   40.95    3.32 
  -1  -7  -3   39.97    3.47 
  -1   7  -4  201.85   17.34 
   1  -7   4  198.11   17.39 
  -1   7  -4  206.10   17.75 
   1   7   4  208.68   17.83 
   1  -7   4  201.86   17.84 
  -1  -7  -4  186.09   16.19 
   1  -7   4  200.78   17.94 
  -1  -7  -4  196.07   17.01 
  -1  -7  -4  169.00   14.69 
   1   7   4  160.45   14.77 
  -1   7  -4  184.86   19.46 
  -1  -7  -4  166.15   14.34 
  -1  -7  -4  187.92   16.12 
   1   7   4  200.75   17.22 
  -1  -7  -4  173.10   15.06 
  -1   7  -5   33.09    2.51 
   1  -7   5   34.75    2.76 
  -1   7  -5   33.81    2.53 
   1   7   5   32.59    2.51 
   1  -7   5   25.29    3.14 
  -1  -7  -5   28.57    2.31 
   1  -7   5   31.48    2.89 
  -1  -7  -5   37.11    3.05 
  -1  -7  -5   27.47    2.22 
  -1   7  -5   35.06    2.64 
  -1  -7  -5   26.57    2.22 
  -1   7  -5   28.78    2.22 
   1  -7   5   23.65    2.06 
   1   7   5   32.06    2.46 
  -1  -7  -5   28.35    2.28 
  -1   7  -6  135.57   17.80 
   1   7   6  126.92   16.76 
   1  -7   6  120.97   16.18 
  -1  -7  -6  130.97   17.25 
   1  -7   6  115.92   15.74 
  -1  -7  -6  131.03   17.22 
  -1  -7  -6  123.00   16.30 
  -1   7  -6  155.41   20.40 
  -1  -7  -6  116.12   15.31 
  -1   7  -6  109.98   14.51 
   1  -7   6  106.63   14.13 
   1   7   6  124.86   16.73 
  -1  -7  -6  111.48   14.80 
   1   8  -6   32.27    4.41 
   1  -8  -6   41.81    5.35 
  -1  -8   6   40.91    5.31 
  -1   8   6   39.59    5.08 
   1   8  -5   20.46    3.40 
   1   8  -5   22.36    3.72 
  -1   8   5   18.80    3.15 
   1  -8  -5   20.76    3.61 
  -1  -8   5    9.35    2.82 
  -1   8   5   19.53    3.24 
  -1  -8   5   14.84    2.79 
  -1   8   5   17.66    3.03 
   1  -8  -5   18.11    3.11 
   1   8  -4   27.14    4.51 
  -1  -8   4   24.50    4.19 
   1   8  -4   28.27    4.68 
  -1   8   4   23.42    3.89 
   1  -8  -4   26.08    4.43 
  -1  -8   4   26.24    4.56 
   1  -8  -4   24.11    4.05 
  -1   8   4   28.60    4.74 
   1   8  -4   20.19    3.60 
  -1  -8   4   24.11    4.20 
  -1   8   4   20.90    3.79 
   1  -8  -4   21.31    3.67 
   1   8  -3   31.11    2.51 
  -1   8   3   23.94    1.88 
  -1  -8   3   29.68    2.57 
   1  -8  -3   27.85    2.29 
   1   8  -3   28.96    2.18 
  -1  -8   3   22.19    2.23 
   1  -8  -3   29.09    2.47 
  -1  -8   3   28.90    2.65 
   1  -8  -3   28.91    2.29 
  -1   8   3   28.86    2.21 
   1   8  -3   30.07    2.30 
  -1  -8   3   26.50    2.27 
  -1   8   3   25.26    2.31 
   1  -8  -3   24.49    2.18 
   1   8  -2  113.22    9.54 
  -1   8   2   94.95    8.65 
   1  -8  -2  100.03    8.51 
  -1  -8   2  106.28    9.18 
  -1   8   2  101.22    8.40 
   1   8  -2   85.14    9.35 
  -1  -8   2   94.38    7.99 
   1  -8  -2  102.16    9.03 
  -1  -8   2  106.37    9.25 
   1  -8  -2  100.84    8.52 
  -1   8   2  104.29    8.93 
   1   8  -2  110.89    9.25 
  -1  -8   2   99.19    8.74 
  -1   8   2   97.15    8.21 
   1  -8  -2   91.94    7.80 
  -1   8   1   63.83    5.37 
   1   8  -1   68.09    5.77 
   1  -8  -1   61.08    5.34 
  -1  -8   1   62.15    5.40 
  -1   8   1   58.00    4.86 
   1   8  -1   57.03    4.82 
   1  -8  -1   59.72    5.35 
  -1  -8   1   54.34    4.68 
  -1  -8   1   50.30    4.41 
   1  -8  -1   53.49    4.68 
  -1   8   1   57.74    4.84 
   1   8  -1   59.00    5.09 
  -1  -8   1   54.30    4.69 
  -1   8   1   52.54    4.44 
   1   8  -1   54.62    4.70 
  -1   8   0    1.16    0.92 
   1   8   0    1.49    0.92 
   1  -8   0   -0.36    1.43 
  -1  -8   0    0.76    1.51 
  -1   8   0    1.96    0.72 
   1   8   0    1.51    0.64 
   1  -8   0    1.52    1.16 
  -1  -8   0    1.92    1.13 
   1  -8   0    1.48    1.23 
  -1  -8   0    0.52    1.29 
  -1   8   0    1.14    0.81 
   1   8   0    1.62    0.78 
  -1  -8   0    0.37    1.09 
   1   8   0    1.26    0.76 
  -1   8  -1    7.29    1.07 
   1   8   1    6.60    0.86 
   1  -8   1    6.33    1.33 
  -1  -8  -1    9.21    1.40 
  -1   8  -1    7.36    0.91 
   1  -8   1    5.19    1.17 
  -1  -8  -1    7.15    1.02 
   1  -8   1    6.06    1.39 
  -1  -8  -1    6.15    1.21 
  -1   8  -1    4.13    1.10 
   1   8   1    8.65    0.89 
  -1  -8  -1    6.90    1.15 
   1   8   1    7.69    0.91 
  -1   8  -2  408.99   67.31 
   1   8   2  385.11   28.19 
   1  -8   2  424.48   70.09 
  -1  -8  -2  380.31   28.05 
  -1   8  -2  441.92   72.52 
   1   8   2  338.37   26.64 
   1  -8   2  386.28   29.30 
  -1  -8  -2  373.02   27.62 
  -1  -8  -2  384.52   28.45 
   1   8   2  391.12   64.37 
  -1   8  -2  395.16   64.91 
  -1   8  -2  371.62   27.59 
   1   8   2  393.52   65.31 
  -1   8  -3    4.80    1.23 
   1  -8   3    5.24    1.43 
  -1   8  -3    5.25    1.17 
   1   8   3    4.82    1.30 
   1  -8   3    6.53    1.40 
  -1  -8  -3    3.82    1.38 
   1  -8   3    6.59    1.66 
  -1  -8  -3    5.41    1.44 
   1   8   3    3.97    1.16 
  -1   8  -3    5.26    1.17 
   1   8   3    5.26    1.20 
  -1   8  -4   43.40    5.82 
   1  -8   4   39.44    5.32 
  -1   8  -4   45.82    6.09 
   1   8   4   46.85    6.19 
   1  -8   4   30.05    4.35 
  -1  -8  -4   40.51    5.44 
   1  -8   4   43.32    5.93 
  -1  -8  -4   44.72    5.98 
  -1   8  -4   51.25    6.76 
   1   8   4   36.00    6.27 
   1   8   5   26.40    3.72 
  -1  -8  -5   23.18    3.32 
   1  -8   5   23.10    3.39 
  -1  -8  -5   26.28    3.71 
   1   8   5   21.58    3.15 
   1   9  -2  194.79   24.74 
  -1  -9   2  195.25   24.84 
   1  -9  -2  178.85   22.82 
  -1  -9   2  124.58   16.67 
  -1   9   2  163.56   22.04 
   1   9  -2  145.94   21.46 
  -1   9   1   21.12    2.99 
   1   9  -1   26.41    3.72 
   1  -9  -1   23.85    3.43 
  -1  -9   1   26.93    3.90 
   1  -9  -1   24.22    3.52 
  -1  -9   1   24.88    3.67 
  -1   9   1   28.14    3.95 
   1   9  -1   22.84    3.38 
  -1   9   0   25.45    3.60 
   1   9   0   29.24    4.10 
   1  -9   0   23.72    3.46 
  -1  -9   0   26.68    3.81 
  -1   9   0   19.23    2.88 
   1  -9   0   25.84    3.73 
   1  -9   0   21.49    3.14 
  -1  -9   0   23.67    3.42 
  -1   9   0   26.82    3.78 
   1   9   0   26.46    3.74 
  -1   9  -1   43.10    5.84 
   1  -9   1   37.99    5.20 
  -1   9  -1   26.45    3.98 
   1  -9   1   36.87    4.80 
  -1  -9  -1   40.46    5.20 
   1   9   1   40.86    5.21 
   2   0 -11  441.09   32.15 
   2   0 -11  482.77   35.05 
   2   0 -10   22.74    1.73 
   2   0 -10   22.82    1.76 
   2   0 -10   16.10    1.87 
   2   0 -10   23.42    1.70 
   2   0  -9    3.10    0.89 
   2   0  -9    2.98    0.76 
   2   0  -9    3.45    0.81 
   2   0  -9    4.09    0.82 
   2   0  -9    2.93    0.83 
   2   0  -9    1.97    0.78 
   2   0  -9    3.91    0.77 
  -2   0   8  509.61   43.65 
   2   0  -8  454.12   38.76 
   2   0  -8  464.11   39.95 
  -2   0   8  556.50   47.74 
   2   0  -8  504.81   43.23 
   2   0  -8  502.61   43.12 
   2   0  -8  552.92   46.74 
   2   0  -8  480.29   41.14 
   2   0  -8  441.37   37.80 
   2   0  -8  455.93   39.17 
   2   0  -8  492.63   42.11 
   2   0  -8  508.22   43.44 
  -2   0   7  615.12   55.90 
   2   0  -7  500.34   48.79 
   2   0  -7  604.74   54.76 
   2   0  -7  579.17   52.66 
   2   0  -7  548.79   50.11 
  -2   0   7  642.85   59.16 
  -2   0   7  570.71   53.25 
  -2   0   7  504.96   46.35 
  -2   0   7  546.61   50.50 
   2   0  -7  487.60   44.80 
   2   0  -7  538.42   49.90 
   2   0  -7  604.14   54.25 
   2   0  -7  493.04   46.15 
   2   0  -7  501.73   45.56 
   2   0  -7  550.71   49.55 
   2   0  -7  551.60   50.40 
   2   0  -7  561.18   51.05 
   2   0  -7  593.77   53.44 
   2   0  -7  593.10   53.17 
  -2   0   6    1.70    0.68 
   2   0  -6    1.27    0.67 
   2   0  -6    0.77    0.72 
   2   0  -6    1.69    0.75 
   2   0  -6    0.96    0.81 
   2   0  -6    2.11    0.85 
   2   0  -6    1.19    0.87 
   2   0  -6    1.45    1.16 
   2   0  -6    1.35    1.11 
   2   0  -6    1.37    0.58 
   2   0  -6    0.81    0.53 
   2   0  -6    0.95    0.57 
   2   0  -6    2.36    0.60 
   2   0  -5 3750.71  265.90 
   2   0  -5 2817.55  254.06 
   2   0  -5 3712.78  267.33 
   2   0  -5 3891.31  272.18 
   2   0  -5 3551.81  261.02 
   2   0  -5 3632.52  279.52 
   2   0  -5 3881.56  298.74 
   2   0  -5 3922.47  333.20 
   2   0  -5 3933.64  337.13 
   2   0  -4 5345.80  500.40 
   2   0  -4 5599.30  515.29 
   2   0  -4 5600.41  518.96 
   2   0  -4 5918.39  543.02 
   2   0  -4 5770.72  531.62 
  -2   0   4 6493.26  611.73 
   2   0  -4 5737.63  588.85 
   2   0  -4 5523.33  583.91 
   2   0  -4 5933.81  562.87 
  -2   0   3 2281.72  212.19 
   2   0  -3 2501.22  230.85 
   2   0  -3 2684.61  251.88 
   2   0  -3 2542.79  233.95 
  -2   0   3 2769.06  265.90 
   2   0  -3 2783.21  253.96 
   2   0  -3 2670.62  243.39 
  -2   0   3 2646.14  268.52 
   2   0  -3 2713.20  270.66 
   2   0  -3 3144.35  298.33 
   2   0  -3 3060.84  283.75 
  -2   0   2   85.58    7.93 
   2   0  -2   98.93    9.11 
  -2   0   2   88.31    8.44 
   2   0  -2  129.55   11.89 
   2   0  -2  123.84   11.46 
  -2   0   2  104.83   10.06 
   2   0  -2  108.20    9.98 
  -2   0   2  118.49   11.21 
  -2   0   2  107.44   10.25 
   2   0  -2  116.66   11.09 
   2   0  -2  113.17   10.49 
   2   0  -2  121.36   11.23 
  -2   0   1  363.72   33.75 
   2   0  -1  393.47   36.42 
   2   0  -1  418.44   38.08 
   2   0  -1  309.50   28.23 
  -2   0   1  408.70   37.69 
   2   0  -1  392.13   35.75 
  -2   0   1  389.88   35.59 
  -2   0   1  395.35   36.33 
   2   0  -1  423.52   38.65 
   2   0  -1  447.69   40.84 
   2   0  -1  407.10   37.12 
  -2   0   0 1172.56  107.03 
   2   0   0 1711.53  156.09 
   2   0   0 1564.57  142.27 
   2   0   0 1300.70  118.33 
  -2   0   0 1596.64  145.86 
   2   0   0 1507.66  137.87 
  -2   0   0 1537.51  140.10 
  -2   0   0 1762.34  162.55 
   2   0   0 1668.40  151.89 
   2   0   0 1666.29  151.59 
   2   0   0 1583.84  144.12 
  -2   0  -1 1605.91  145.93 
   2   0   1 1651.09  150.05 
   2   0   1 1784.83  162.89 
  -2   0  -1 1426.24  129.59 
  -2   0  -1 1826.12  166.01 
   2   0   1 1519.19  138.23 
  -2   0  -1 1560.21  142.03 
  -2   0  -1 1659.58  152.19 
   2   0   1 1832.72  166.51 
   2   0   1 1779.26  161.75 
   2   0   1 1670.68  151.80 
  -2   0  -2 1675.12  152.21 
   2   0   2 1777.20  161.54 
   2   0   2 2102.19  191.03 
  -2   0  -2 1817.45  165.14 
   2   0   2 1769.64  160.78 
  -2   0  -2 1707.44  155.14 
  -2   0  -2 2065.31  187.66 
   2   0   2 2132.65  193.79 
   2   0   2 2100.63  190.89 
   2   0   2 1954.64  177.60 
  -2   0  -3   78.87    5.57 
   2   0   3   89.06    6.26 
   2   0   3  107.50    7.54 
  -2   0  -3   90.05    6.41 
   2   0   3   77.28    5.41 
  -2   0  -3   80.99    5.71 
  -2   0  -3   79.90    5.67 
   2   0   3   89.46    6.64 
   2   0   3   90.25    6.35 
   2   0   3   86.09    6.07 
  -2   0  -3   79.30    5.54 
  -2   0  -3   81.56    5.70 
  -2   0  -3   79.23    5.67 
  -2   0  -3   75.00    5.29 
  -2   0  -3   83.40    5.82 
  -2   0  -3   84.10    5.96 
  -2   0  -4   59.06    4.29 
   2   0   4   68.82    5.01 
   2   0   4   71.67    5.18 
  -2   0  -4   57.39    4.19 
  -2   0  -4   63.32    4.59 
  -2   0  -4   71.67    5.29 
   2   0   4   77.55    5.58 
   2   0   4   71.25    5.15 
   2   0   4   68.54    4.98 
  -2   0  -4   69.62    4.99 
  -2   0  -4   65.67    4.69 
  -2   0  -4   70.15    4.99 
  -2   0  -4   70.92    5.06 
  -2   0  -4   71.22    5.12 
   2   0   5  134.85   12.14 
  -2   0  -5  109.28    9.86 
  -2   0  -5  117.57   10.60 
  -2   0  -5  124.65   11.26 
   2   0   5  119.58   10.79 
   2   0   5  120.46   10.86 
  -2   0  -5  121.37   10.92 
  -2   0  -5  126.83   11.37 
  -2   0  -5  116.90   10.49 
   2   0   5  113.47   10.17 
  -2   0  -5  109.07    9.79 
  -2   0  -5  112.87   10.20 
  -2   0  -5   99.46    8.93 
  -2   0  -5  106.46    9.56 
  -2   0  -5  123.47   11.09 
  -2   0  -5  117.16   10.56 
   2   0   6   55.85    4.97 
  -2   0  -6   47.13    4.17 
  -2   0  -6   47.87    4.15 
  -2   0  -6   50.25    4.43 
   2   0   6   51.49    4.54 
   2   0   6   53.89    4.70 
   2   0   6   47.94    4.26 
  -2   0  -6   56.79    4.90 
  -2   0  -6   51.69    4.51 
  -2   0  -6   53.70    4.63 
   2   0   6   46.11    3.93 
  -2   0  -6   52.78    4.51 
  -2   0  -6   56.13    4.94 
  -2   0  -6   50.75    4.33 
  -2   0  -6   53.53    4.65 
  -2   0  -6   54.16    4.65 
  -2   0  -6   55.31    4.79 
   2   0   7  281.70   22.86 
  -2   0  -7  241.45   19.58 
  -2   0  -7  254.17   20.60 
   2   0   7  259.85   21.10 
   2   0   7  229.57   18.70 
  -2   0  -7  264.75   21.49 
  -2   0  -7  250.07   20.22 
  -2   0  -7  262.53   21.26 
  -2   0  -7  247.69   20.02 
  -2   0  -7  256.79   20.80 
  -2   0  -7  301.66   24.41 
  -2   0  -7  271.56   21.98 
  -2   0  -7  258.97   21.01 
  -2   0  -8   92.90    6.34 
  -2   0  -8   84.43    5.70 
  -2   0  -8   88.56    5.99 
   2   0   8   85.85    5.87 
  -2   0  -8   25.65   12.04 
  -2   0  -8   83.91    5.75 
  -2   0  -9    9.55    1.16 
  -2   0  -9   12.10    1.26 
  -2   0  -9    8.57    1.14 
   2   0   9   10.07    1.08 
  -2   0  -9   10.88    1.24 
  -2   0  -9   11.63    1.33 
  -2   0  -9    9.46    1.27 
  -2   0 -10   -0.26    1.20 
  -2   0 -10    0.69    1.16 
  -2   0 -10   -0.66    1.14 
  -2   0 -10    0.02    1.13 
   2   0  10   -0.70    1.28 
   2   1 -11   28.97    2.50 
   2   1 -11   25.78    2.33 
   2   1 -11   27.74    2.38 
   2   1 -11   29.38    2.58 
   2   1 -11   27.00    2.38 
   2  -1 -10  146.90   11.75 
   2   1 -10  153.26   12.22 
   2  -1 -10  136.59   11.31 
   2   1 -10  165.98   13.18 
   2   1 -10  148.63   11.93 
   2   1 -10  141.66   11.31 
   2   1 -10  140.57   11.92 
   2  -1 -10  169.28   13.38 
   2   1 -10  162.84   12.94 
  -2  -1   9  156.18   13.26 
   2   1  -9  169.34   13.69 
  -2  -1   9  210.57   17.41 
   2  -1  -9  183.23   14.79 
   2  -1  -9  177.24   14.24 
   2   1  -9  194.49   15.62 
   2  -1  -9  170.43   14.43 
   2   1  -9  178.72   14.83 
   2   1  -9  180.48   14.56 
   2   1  -9  183.02   14.82 
   2  -1  -9  161.03   12.82 
   2   1  -9  180.79   14.59 
   2   1  -9  185.70   14.95 
   2  -1  -9  182.07   15.22 
   2   1  -9  203.10   16.36 
   2  -1  -9  169.93   13.71 
  -2   1   8  102.03    9.25 
   2   1  -8   91.87    7.83 
   2   1  -8   91.56    7.90 
   2   1  -8   92.71    8.13 
  -2  -1   8   99.37    9.08 
   2  -1  -8   99.74    8.81 
  -2   1   8   98.44    8.78 
  -2   1   8   94.68    8.36 
  -2   1   8   91.33    8.02 
   2   1  -8   94.16    7.98 
   2  -1  -8   83.58    7.27 
   2  -1  -8   95.42    8.16 
   2   1  -8   95.98    8.20 
   2  -1  -8   97.95    8.31 
   2   1  -8   96.21    8.30 
   2  -1  -8   99.90    8.64 
   2   1  -8   89.23    7.99 
   2  -1  -8   85.29    7.59 
   2   1  -8   99.07    8.58 
   2   1  -8   98.99    8.69 
   2  -1  -8   90.09    7.68 
   2   1  -8   88.01    7.60 
   2   1  -8   97.08    8.34 
   2  -1  -8   83.14    7.49 
   2   1  -8  102.47    9.04 
   2  -1  -8   89.90    7.84 
  -2  -1   7   65.00    6.47 
   2  -1  -7   71.77    6.75 
  -2   1   7   71.45    6.64 
   2   1  -7   56.94    5.16 
   2   1  -7   77.78    7.12 
   2  -1  -7   72.03    6.59 
  -2   1   7   65.29    6.26 
   2   1  -7   72.69    6.84 
  -2  -1   7   76.69    7.58 
   2  -1  -7   81.62    7.40 
   2  -1  -7   77.08    7.48 
   2  -1  -7   73.69    7.23 
   2  -1  -7   75.39    7.34 
   2   1  -7   74.27    6.67 
   2  -1  -7   60.78    5.48 
   2  -1  -7   72.28    6.68 
   2  -1  -7   70.60    6.47 
   2  -1  -7   74.33    6.69 
   2   1  -7   71.00    6.42 
   2  -1  -7   64.37    6.31 
   2   1  -7   79.42    7.15 
   2  -1  -7   65.58    6.37 
   2   1  -7   68.46    6.16 
   2   1  -7   73.40    6.68 
   2   1  -7   77.71    7.16 
   2  -1  -7   76.65    6.95 
   2   1  -7   69.92    6.32 
   2   1  -7   75.95    6.88 
   2  -1  -7   76.26    6.87 
   2   1  -7   78.24    7.15 
   2  -1  -7   71.34    6.44 
   2  -1  -7   70.29    6.57 
  -2  -1   6  397.20   28.43 
   2  -1  -6  355.40   28.27 
   2   1  -6  324.40   23.23 
   2  -1  -6  321.56   22.78 
   2  -1  -6  323.48   23.73 
   2   1  -6  334.54   24.40 
   2   1  -6  323.33   23.35 
   2  -1  -6  323.84   24.94 
   2   1  -6  315.43   22.87 
   2  -1  -6  317.68   23.61 
  -2  -1   6  360.11   27.35 
   2  -1  -6  349.02   25.23 
  -2  -1   6  282.33   21.79 
   2  -1  -6  356.59   30.08 
   2  -1  -6  342.61   25.60 
   2  -1  -6  356.55   29.24 
   2  -1  -6  305.51   22.68 
   2   1  -6  337.12   24.08 
   2  -1  -6  343.80   24.38 
   2   1  -6  318.44   22.82 
   2  -1  -6  290.49   20.84 
   2   1  -6  339.71   24.21 
   2  -1  -6  308.72   22.05 
   2   1  -6  315.58   22.74 
   2  -1  -6  292.18   20.94 
   2   1  -6  276.46   20.43 
   2  -1  -6  314.15   22.49 
  -2  -1   5  272.51   21.82 
   2  -1  -5  271.20   20.09 
   2   1  -5  218.81   18.33 
   2  -1  -5  266.24   18.84 
   2   1  -5  261.67   18.51 
   2  -1  -5  254.68   18.57 
   2   1  -5  261.25   18.39 
   2  -1  -5  253.30   17.67 
   2   1  -5  268.06   19.49 
  -2  -1   5  273.82   21.41 
   2  -1  -5  307.66   21.44 
  -2  -1   5  279.08   20.58 
   2  -1  -5  274.29   25.48 
  -2  -1   5  239.22   17.09 
   2  -1  -5  298.31   23.18 
   2  -1  -5  348.79   26.99 
   2   1  -5  232.91   16.17 
   2   1  -5  320.19   22.42 
   2   1  -5  267.45   18.97 
   2   1  -5  297.79   20.88 
   2   1  -5  289.86   20.26 
   2   1  -5  350.66   24.43 
  -2  -1   4 6889.45  649.68 
   2   1  -4 7917.27  732.19 
  -2  -1   4 8189.76  783.14 
   2  -1  -4 9042.91  733.15 
   2   1  -4 8421.86  771.93 
   2  -1  -4 7308.54  704.04 
  -2   1   4 9999.00  752.78 
   2   1  -4 9365.32  660.91 
   2   1  -4 8838.38  622.96 
   2  -1  -4 9385.17  652.24 
  -2   1   4 8241.73  791.03 
   2   1  -4 8537.81  776.61 
  -2  -1   4 9300.34  684.69 
   2  -1  -4 8143.77  745.48 
  -2  -1   4 8212.41  771.26 
   2  -1  -4 9085.44  808.66 
   2  -1  -4 9538.95  712.19 
   2  -1  -4 9210.84  676.94 
   2   1  -4 8458.55  820.65 
  -2   1   3 1449.04  132.08 
   2   1  -3 1471.49  133.74 
   2  -1  -3 1448.61  131.84 
  -2  -1   3 1410.17  128.39 
  -2  -1   3 1393.75  135.37 
   2  -1  -3 1624.49  160.47 
   2   1  -3 1269.86  131.23 
   2  -1  -3 1353.50  124.28 
  -2  -1   3 1512.04  146.54 
  -2   1   3 1438.78  136.29 
   2   1  -3 1547.23  141.66 
   2  -1  -3 1645.09  150.08 
  -2   1   3 1442.64  132.72 
   2   1  -3 1424.44  129.79 
  -2  -1   3 1524.30  147.23 
   2  -1  -3 1555.69  143.21 
   2  -1  -3 1694.97  167.97 
   2  -1  -3 1691.32  164.51 
   2   1  -3 1766.50  160.74 
   2   1  -3 1546.97  150.47 
   2  -1  -3 1723.90  158.73 
  -2   1   2 2450.10  227.72 
   2   1  -2 2466.22  224.18 
   2  -1  -2 2575.54  240.96 
   2  -1  -2 3095.82  291.69 
   2   1  -2 2771.61  256.61 
   2  -1  -2 2103.77  191.36 
  -2  -1   2 3104.92  290.18 
  -2   1   2 2731.36  250.63 
   2   1  -2 2433.30  221.54 
   2  -1  -2 2660.23  253.80 
  -2   1   2 2795.46  255.54 
   2   1  -2 3224.77  294.41 
  -2  -1   2 3295.52  316.18 
   2  -1  -2 3036.84  280.51 
   2   1  -2 2589.49  235.44 
   2  -1  -2 3235.46  297.42 
   2   1  -2 3051.73  277.82 
   2  -1  -2 3138.21  289.61 
  -2  -1   1  761.94   70.19 
  -2   1   1  671.84   61.31 
   2   1  -1  723.23   66.05 
   2  -1  -1  736.83   67.26 
   2  -1  -1  719.80   65.90 
  -2  -1   1  719.45   66.05 
  -2   1   1  697.36   63.42 
   2   1  -1  618.51   58.66 
  -2  -1   1  723.14   70.31 
  -2   1   1  693.31   63.45 
   2   1  -1  715.36   65.31 
   2  -1  -1  768.41   70.00 
  -2  -1   1  736.89   67.78 
  -2   1   1  713.86   65.18 
  -2  -1   1  722.71   69.09 
   2   1  -1  694.52   65.41 
   2  -1  -1  811.53   74.07 
   2   1  -1  718.17   65.65 
   2  -1  -1  803.77   73.21 
   2   1  -1  619.22   56.35 
   2  -1  -1  801.82   73.14 
  -2  -1   0 1832.99  168.78 
  -2   1   0 1758.42  159.98 
   2   1   0 1754.37  160.71 
   2  -1   0 1764.36  160.67 
   2  -1   0 1726.08  157.90 
  -2  -1   0 1928.37  176.08 
  -2   1   0 1585.89  144.33 
   2   1   0 1636.79  150.18 
  -2  -1   0 1769.15  163.29 
  -2   1   0 1711.03  157.28 
   2   1   0 1498.05  139.72 
   2  -1   0 1811.16  165.58 
  -2  -1   0 1736.79  159.44 
  -2   1   0 1797.89  163.66 
  -2  -1   0 1979.23  185.16 
  -2   1   0 1818.01  165.65 
   2   1   0 2042.54  189.65 
   2  -1   0 1827.24  166.63 
   2   1   0 1995.49  183.71 
   2  -1   0 1998.44  182.29 
   2   1   0 1682.11  153.01 
   2  -1   0 1815.56  165.75 
  -2  -1  -1 2257.82  206.36 
  -2   1  -1 2165.33  196.76 
   2   1   1 2259.26  206.46 
   2  -1   1 2292.94  208.41 
   2  -1   1 2354.99  215.84 
  -2  -1  -1 2539.95  231.51 
  -2   1  -1 1837.35  167.32 
   2   1   1 2038.17  185.63 
  -2  -1  -1 2252.95  206.59 
  -2   1  -1 2095.21  194.05 
   2   1   1 2157.57  196.24 
   2  -1   1 2096.46  191.91 
  -2  -1  -1 2335.44  213.06 
  -2   1  -1 2214.66  201.36 
  -2  -1  -1 2369.76  218.26 
  -2   1  -1 2341.37  212.83 
   2   1   1 2759.51  251.37 
   2  -1   1 2267.11  207.14 
   2   1   1 2689.90  244.73 
   2  -1   1 2228.65  203.48 
   2   1   1 2468.83  224.65 
   2  -1   1 2315.19  211.81 
  -2  -1  -2 2752.30  250.37 
  -2   1  -2 2694.80  244.88 
   2   1   2 2943.85  268.02 
   2  -1   2 2776.93  252.94 
   2  -1   2 3247.28  298.84 
  -2  -1  -2 3492.79  317.99 
  -2   1  -2 1820.86  271.13 
  -2  -1  -2 2761.42  252.01 
  -2   1  -2 2809.99  255.42 
   2   1   2 2521.90  229.45 
   2  -1   2 2089.87  191.66 
  -2  -1  -2 2618.63  238.92 
  -2   1  -2 2732.58  248.31 
  -2  -1  -2 3062.78  280.77 
  -2   1  -2 2955.60  268.62 
   2   1   2 2977.01  271.35 
   2  -1   2 2972.14  271.26 
   2   1   2 3138.91  285.63 
   2  -1   2 2924.51  267.96 
   2   1   2 3183.81  289.44 
   2  -1   2 2660.05  243.18 
  -2  -1  -3 3800.07  263.25 
  -2   1  -3 3540.37  244.92 
   2   1   3 3989.98  277.43 
   2  -1   3 3758.87  261.00 
   2  -1   3 4167.35  292.03 
  -2  -1  -3 4084.89  283.01 
  -2   1  -3 3358.09  232.01 
  -2  -1  -3 4029.58  279.05 
  -2   1  -3 3600.66  248.91 
   2   1   3 3376.17  233.43 
  -2   1  -3 3522.55  243.49 
  -2  -1  -3 3719.35  257.20 
  -2  -1  -3 4427.65  307.58 
  -2   1  -3 3828.83  264.68 
   2   1   3 4354.72  301.52 
   2  -1   3 4386.42  307.32 
   2   1   3 2957.60  205.73 
   2  -1   3 3854.58  268.87 
   2   1   3 4201.40  291.13 
   2  -1   3 3603.26  282.75 
  -2  -1  -3 4008.95  277.36 
  -2   1  -3 3539.96  245.61 
  -2  -1  -3 3786.74  262.17 
  -2   1  -3 3992.69  275.84 
  -2  -1  -3 3941.56  273.02 
  -2   1  -3 3564.14  247.00 
  -2  -1  -3 4145.89  286.96 
  -2   1  -3 3861.49  266.84 
  -2   1  -3 2892.90  207.69 
  -2   1  -3 3797.56  262.41 
  -2  -1  -3 3903.56  277.57 
  -2   1  -3 3658.81  252.96 
  -2  -1  -3 4251.24  293.96 
  -2   1  -3 3358.56  236.16 
  -2  -1  -4 3244.18  229.22 
  -2   1  -4 3381.80  238.80 
   2   1   4 3756.23  289.76 
   2  -1   4 3639.91  258.30 
   2  -1   4 4007.73  310.16 
  -2  -1  -4 4332.42  334.09 
  -2  -1  -4 3835.62  295.54 
  -2   1  -4 4126.34  317.73 
   2   1   4 3368.36  237.69 
  -2   1  -4 3751.19  288.93 
  -2  -1  -4 3852.29  296.63 
  -2  -1  -4 3955.88  305.00 
  -2   1  -4 3842.92  296.51 
   2   1   4 4187.38  322.75 
   2  -1   4 4421.82  344.13 
   2   1   4 4093.28  315.35 
   2  -1   4 3717.69  287.29 
   2   1   4 3975.97  306.24 
   2  -1   4 3666.48  259.85 
  -2   1  -4 3075.46  217.04 
   2  -1   4 3169.03  223.74 
   2   1   4 3073.56  216.88 
  -2  -1  -4 4034.11  310.84 
  -2   1  -4 3808.29  293.93 
  -2  -1  -4 3962.06  305.03 
  -2   1  -4 3706.43  285.29 
  -2  -1  -4 3796.42  299.68 
  -2   1  -4 3811.07  293.91 
  -2  -1  -4 4075.58  314.00 
  -2   1  -4 3756.63  289.15 
  -2  -1  -4 3616.35  255.22 
  -2   1  -4 3656.35  258.01 
  -2  -1  -4 4146.85  319.74 
  -2   1  -4 3988.84  307.02 
  -2   1  -4 4096.61  315.33 
  -2  -1  -4 4195.18  323.20 
  -2   1  -4 3853.00  297.16 
  -2  -1  -4 4209.69  324.39 
  -2   1  -4 3213.99  256.32 
  -2   1  -5  190.15   17.05 
   2  -1   5  194.90   17.57 
   2   1   5  238.14   21.42 
   2  -1   5  234.62   21.17 
  -2  -1  -5  241.23   21.64 
  -2   1  -5  206.87   18.56 
  -2   1  -5  225.98   20.26 
  -2  -1  -5  233.40   20.95 
  -2   1  -5  226.52   20.37 
   2   1   5  251.02   22.52 
   2  -1   5  232.89   20.98 
   2   1   5  238.57   21.39 
   2   1   5  221.21   19.84 
   2  -1   5  218.51   19.63 
  -2  -1  -5  240.90   21.61 
  -2   1  -5  223.34   20.06 
  -2  -1  -5  229.11   20.52 
  -2   1  -5  217.44   19.47 
  -2  -1  -5  242.44   21.71 
  -2   1  -5  220.69   19.79 
  -2  -1  -5  232.26   20.80 
  -2   1  -5  218.56   19.57 
  -2  -1  -5  251.20   22.53 
  -2   1  -5  228.81   20.54 
  -2   1  -5  234.14   20.95 
  -2  -1  -5  226.88   20.31 
  -2   1  -5  221.07   20.00 
  -2  -1  -5  249.69   22.36 
  -2   1  -5  226.40   20.30 
  -2  -1  -5  252.40   22.64 
  -2   1  -5  229.84   20.69 
   2   1   6  332.95   28.19 
   2  -1   6  309.02   26.38 
  -2  -1  -6  282.61   23.91 
  -2   1  -6  296.98   25.13 
  -2   1  -6  295.72   25.01 
  -2  -1  -6  310.23   26.25 
  -2   1  -6  299.50   25.37 
   2   1   6  324.63   27.47 
   2  -1   6  292.87   24.84 
   2   1   6  300.18   25.40 
   2  -1   6  297.45   25.19 
   2  -1   6  278.24   23.55 
  -2  -1  -6  319.03   27.00 
  -2   1  -6  315.74   26.74 
  -2  -1  -6  302.51   25.55 
  -2   1  -6  308.74   26.08 
  -2  -1  -6  319.82   27.04 
  -2   1  -6  304.52   25.78 
  -2  -1  -6  306.07   25.88 
  -2   1  -6  304.34   25.72 
   2  -1   6  299.44   25.30 
  -2  -1  -6  293.59   24.90 
  -2   1  -6  313.02   26.42 
  -2  -1  -6  300.47   25.39 
  -2   1  -6  333.51   28.16 
  -2  -1  -6  320.51   27.10 
  -2   1  -6  316.88   26.90 
  -2  -1  -6  323.62   27.37 
  -2   1  -6  320.17   27.12 
   2   1   7 1037.35   82.47 
   2  -1   7 1013.71   80.98 
  -2  -1  -7 1010.98   80.23 
  -2   1  -7  864.10   68.61 
  -2   1  -7  832.15   66.06 
  -2  -1  -7  985.91   78.27 
  -2   1  -7  941.10   74.79 
   2   1   7 1024.08   81.62 
   2   1   7  926.60   73.73 
   2   1   7  871.73   69.33 
  -2  -1  -7 1059.55   84.16 
  -2   1  -7 1056.67   84.05 
  -2  -1  -7 1015.38   80.55 
  -2   1  -7  999.50   79.51 
  -2  -1  -7 1078.66  110.66 
  -2   1  -7  998.93   79.60 
   2   1   7  854.33   68.25 
  -2   1  -7  944.56   74.94 
   2  -1   7 1005.04   79.75 
  -2  -1  -7  958.27   76.12 
  -2   1  -7  957.81   76.00 
  -2  -1  -7 1074.54  110.16 
  -2   1  -7  911.91   80.84 
  -2  -1  -7 1050.54   83.88 
  -2   1  -7  981.51   78.04 
  -2  -1  -7 1016.57   81.67 
  -2   1  -7  975.18   77.49 
  -2  -1  -8  355.58   28.07 
  -2   1  -8  340.68   26.96 
  -2  -1  -8  350.88   27.67 
  -2   1  -8  392.59   30.97 
  -2  -1  -8  350.28   27.66 
  -2   1  -8  340.37   26.89 
  -2   1  -8  328.30   25.91 
  -2  -1  -8  420.97   33.24 
  -2   1  -8  280.68   22.17 
  -2  -1  -8  357.32   28.20 
  -2   1  -8  225.33   43.18 
  -2  -1  -8  354.40   28.00 
  -2   1  -8  340.19   26.92 
  -2  -1  -8  337.66   26.76 
  -2   1  -8  350.57   27.71 
  -2  -1  -9   69.74    5.85 
  -2   1  -9   71.48    6.02 
  -2  -1  -9   90.13    7.48 
  -2   1  -9   74.75    6.23 
  -2  -1  -9   85.46    7.15 
  -2   1  -9   82.40    6.91 
  -2   1  -9   73.98    6.17 
   2   1   9   64.60    5.50 
  -2   1  -9   74.36    6.20 
  -2  -1  -9   74.12    6.19 
  -2  -1  -9   85.05    7.10 
  -2   1  -9   76.44    6.39 
   2  -1   9   79.54    6.66 
  -2  -1  -9   66.07    5.70 
  -2  -1 -10   39.99    5.16 
  -2   1 -10   40.38    5.18 
  -2  -1 -10   41.16    5.25 
  -2   1 -10   39.24    5.03 
  -2  -1 -10   40.77    5.23 
  -2   1 -10   39.63    5.10 
  -2   1 -10   37.18    4.77 
  -2  -1 -10   41.41    5.30 
  -2   1 -10   40.73    5.20 
   2   2 -11   50.36    3.76 
   2   2 -11   38.88    2.99 
   2   2 -11   49.56    3.73 
   2   2 -11   43.10    3.30 
   2   2 -11   46.24    3.48 
   2  -2 -10  161.71   12.86 
   2   2 -10  171.73   13.75 
   2   2 -10  178.72   14.18 
   2   2 -10  166.86   13.41 
   2  -2 -10  150.86   11.99 
   2   2 -10  162.57   13.00 
   2   2 -10  170.04   13.85 
   2   2 -10  167.48   13.33 
   2  -2 -10  152.86   12.38 
  -2  -2   9  925.44   96.52 
   2   2  -9  990.18  102.08 
  -2  -2   9 1001.22  104.53 
   2   2  -9 1002.45  103.50 
   2  -2  -9  916.60   94.78 
   2  -2  -9 1020.68  105.21 
   2   2  -9 1106.28  114.49 
   2  -2  -9 1082.57  111.46 
   2   2  -9 1313.59  136.00 
   2  -2  -9  903.82   95.13 
   2   2  -9 1069.85  110.98 
   2   2  -9 1141.64  119.17 
   2  -2  -9  967.71   99.44 
   2   2  -9 1006.79  104.62 
   2   2  -9 1147.99  118.97 
   2   2  -9 1146.50  118.31 
   2  -2  -9 1002.36  103.81 
   2  -2  -8   56.19    4.45 
   2   2  -8   58.01    4.30 
  -2   2   8   47.61    3.64 
   2   2  -8   48.54    3.70 
   2  -2  -8   52.64    4.30 
   2  -2  -8   46.75    4.05 
  -2   2   8   45.41    3.52 
   2   2  -8   51.47    3.76 
   2  -2  -8   56.38    4.25 
   2  -2  -8   54.49    4.19 
   2   2  -8   52.90    3.94 
   2  -2  -8   50.90    3.91 
   2   2  -8   57.78    4.24 
   2  -2  -8   48.27    3.82 
   2   2  -8   66.58    4.93 
   2   2  -8   55.85    4.15 
   2  -2  -8   50.56    3.80 
   2   2  -8   49.86    3.76 
   2   2  -8   57.65    4.28 
   2   2  -8   49.33    3.81 
   2  -2  -8   51.86    3.82 
   2  -2  -8   51.19    3.91 
   2  -2  -7  218.61   16.30 
  -2   2   7  222.41   15.97 
   2   2  -7  200.93   15.86 
   2   2  -7  212.01   16.02 
  -2   2   7  227.49   17.08 
   2   2  -7  210.76   15.74 
  -2  -2   7  212.10   16.62 
   2  -2  -7  210.62   16.01 
   2  -2  -7  210.52   15.89 
   2  -2  -7  219.35   17.63 
   2  -2  -7  214.97   16.72 
   2   2  -7  218.05   15.59 
   2  -2  -7  211.07   16.12 
   2  -2  -7  200.34   15.30 
   2   2  -7  224.66   16.36 
   2  -2  -7  178.04   13.40 
   2   2  -7  225.56   16.27 
   2  -2  -7  218.78   17.16 
   2   2  -7  199.16   14.28 
   2   2  -7  193.53   14.42 
   2   2  -7  208.61   15.17 
   2  -2  -7  220.86   15.84 
   2   2  -7  216.35   15.89 
   2   2  -7  208.64   15.20 
   2   2  -7  226.34   16.37 
   2  -2  -7  223.01   15.98 
   2  -2  -7  214.23   16.28 
  -2  -2   6 1041.44   81.44 
   2  -2  -6  965.27   81.85 
  -2   2   6  910.06   72.84 
   2   2  -6  853.60   74.12 
   2   2  -6  971.89   76.76 
  -2   2   6  869.47   69.67 
   2   2  -6  973.27   77.86 
  -2  -2   6  990.11   81.90 
   2  -2  -6 1068.94   82.79 
   2  -2  -6 1062.62   87.78 
   2  -2  -6 1026.18   83.32 
   2  -2  -6 1009.28   84.45 
   2   2  -6  958.65   74.16 
   2  -2  -6 1008.04   83.55 
   2  -2  -6  899.97   74.32 
   2   2  -6 1057.92   82.56 
   2   2  -6 1029.83   79.83 
   2  -2  -6 1011.66   82.38 
   2   2  -6  897.32   69.31 
   2   2  -6 1022.01   80.25 
   2   2  -6 1012.10   79.42 
   2  -2  -6 1068.92   82.31 
   2   2  -6 1023.00   79.79 
   2   2  -6 1007.41   78.79 
   2   2  -6 1041.17   81.17 
   2  -2  -6 1072.36   82.89 
   2  -2  -6 1030.46   83.85 
   2   2  -5  763.43   54.43 
  -2  -2   5  776.19   56.46 
  -2  -2   5  789.70   59.58 
   2  -2  -5  844.25   63.75 
   2   2  -5  860.75   60.29 
   2   2  -5  841.99   61.51 
   2   2  -5  846.84   61.91 
   2  -2  -5  920.49   63.89 
  -2   2   5  755.65   54.19 
   2   2  -5  831.92   59.17 
  -2  -2   5  920.25   72.10 
   2  -2  -5  897.48   64.04 
   2  -2  -5  893.34   68.33 
   2  -2  -5  877.49   68.19 
   2  -2  -5  952.04   71.47 
   2  -2  -5  782.48   54.57 
   2  -2  -5  758.10   53.90 
   2   2  -5  791.04   55.77 
   2   2  -5  717.05   49.62 
  -2   2   4  156.15   10.98 
   2   2  -4  165.31   11.94 
   2  -2  -4  162.38   12.16 
  -2  -2   4  162.83   13.22 
  -2  -2   4  106.14   12.82 
   2  -2  -4  174.36   14.05 
  -2   2   4  160.65   11.71 
   2   2  -4  136.39    9.53 
  -2  -2   4  176.00   14.38 
  -2   2   4  156.06   11.04 
   2   2  -4  182.29   12.85 
   2  -2  -4  163.99   12.58 
  -2   2   4  161.18   11.67 
   2   2  -4  170.60   12.12 
  -2  -2   4  143.28   12.06 
   2  -2  -4  157.93   11.19 
   2  -2  -4  187.86   15.36 
   2  -2  -4  175.25   13.84 
   2  -2  -4  190.62   14.28 
   2   2  -4  167.29   11.64 
   2  -2  -4  183.04   13.17 
   2   2  -4  167.80   11.74 
   2  -2  -4  177.82   13.00 
   2   2  -4  166.63   11.81 
   2   2  -4  179.64   12.51 
   2   2  -4  174.05   12.22 
   2   2  -4  168.64   11.81 
   2  -2  -4  187.50   13.05 
  -2   2   3 1205.32  110.94 
   2   2  -3 1250.32  114.80 
   2  -2  -3 1282.31  117.41 
  -2  -2   3 1214.71  118.59 
  -2  -2   3 1201.95  116.14 
   2  -2  -3 1352.53  132.21 
  -2   2   3 1090.36  105.03 
   2   2  -3 1259.37  115.31 
  -2  -2   3 1311.04  127.89 
   2   2  -3 1297.92  118.88 
   2  -2  -3 1253.88  123.07 
  -2   2   3 1193.70  110.10 
   2   2  -3 1279.36  117.74 
  -2  -2   3 1355.88  129.03 
   2  -2  -3 1165.19  107.12 
   2  -2  -3 1382.05  146.18 
   2  -2  -3 1409.97  142.59 
   2  -2  -3 1407.52  136.22 
  -2   2   2 2785.38  253.74 
   2   2  -2 2953.24  269.28 
   2  -2  -2 3097.18  282.14 
  -2  -2   2 2990.84  279.21 
   2  -2  -2 3044.94  313.21 
  -2  -2   2 2605.06  252.00 
  -2   2   2 2704.85  249.52 
   2   2  -2 2384.81  240.26 
  -2  -2   2 3004.69  288.83 
  -2   2   2 2448.60  223.11 
  -2   2   2 2278.92  207.69 
   2   2  -2 2469.72  224.76 
   2  -2  -2 3103.91  284.47 
  -2   2   2 2871.74  263.64 
   2   2  -2 2799.91  257.56 
  -2  -2   2 2982.93  283.77 
   2  -2  -2 3361.75  305.39 
   2  -2  -2 3208.06  304.10 
   2  -2  -2 3092.08  291.00 
   2   2  -2 3057.60  280.59 
   2  -2  -2 3253.81  312.09 
  -2   2   1 2586.87  235.45 
   2   2  -1 2546.49  233.46 
   2  -2  -1 2788.72  254.46 
  -2  -2   1 2710.47  256.88 
   2  -2  -1 2741.55  256.70 
  -2  -2   1 2372.19  243.99 
  -2   2   1 2274.27  213.11 
   2   2  -1 2410.86  220.74 
  -2  -2   1 2509.40  235.21 
  -2   2   1 2492.45  229.41 
   2   2  -1 2528.52  231.44 
   2  -2  -1 2702.35  247.41 
  -2   2   1 2476.16  228.85 
   2  -2  -1 2641.63  244.54 
  -2  -2   1 2591.63  256.37 
   2  -2  -1 2780.95  260.59 
  -2  -2   1 2168.58  269.31 
   2   2  -1 2414.37  235.50 
   2  -2  -1 2764.94  259.24 
   2   2  -1 2640.85  245.43 
   2  -2  -1 2752.17  262.14 
  -2   2   0 3124.78  284.36 
   2   2   0 3202.94  293.83 
   2  -2   0 3387.37  308.83 
  -2  -2   0 3402.01  319.32 
   2  -2   0 3219.49  298.89 
  -2  -2   0 3478.14  350.93 
  -2   2   0 2660.31  244.79 
   2   2   0 2876.72  263.25 
  -2  -2   0 3202.27  302.60 
  -2   2   0 2956.93  279.52 
   2   2   0 3077.71  279.91 
   2  -2   0 3103.23  289.66 
  -2  -2   0 2900.58  269.18 
  -2   2   0 3054.24  278.77 
   2  -2   0 3212.82  301.49 
  -2  -2   0 3190.97  311.81 
   2  -2   0 2769.05  258.66 
  -2  -2   0 3329.87  320.85 
   2   2   0 3459.34  317.54 
   2  -2   0 3280.35  304.58 
   2   2   0 3444.14  316.72 
   2  -2   0 3281.89  306.19 
  -2  -2  -1 1141.92  106.77 
  -2   2  -1  984.33   91.08 
   2   2   1 1134.35  104.13 
   2  -2   1  962.97   87.89 
   2  -2   1 1052.92   99.08 
  -2  -2  -1 1151.29  108.35 
  -2   2  -1  955.33   86.83 
   2   2   1  946.50   86.33 
  -2  -2  -1 1063.56  100.81 
  -2   2  -1 1087.03   98.86 
   2   2   1  990.79   90.49 
  -2  -2  -1 1199.92  109.92 
  -2   2  -1 1002.20   93.27 
   2  -2   1 1279.32  117.76 
  -2  -2  -1 1155.49  110.28 
   2  -2   1 1118.95  105.56 
  -2  -2  -1 1087.74  101.57 
   2   2   1 1227.55  111.65 
   2  -2   1 1075.17  102.00 
   2   2   1 1244.60  113.27 
   2  -2   1 1057.54   98.54 
  -2  -2  -2  380.71   27.35 
  -2   2  -2  337.82   23.70 
   2   2   2  402.99   28.52 
   2  -2   2  339.07   24.20 
   2  -2   2  360.12   26.04 
  -2  -2  -2  368.46   27.93 
  -2   2  -2  302.31   23.33 
  -2  -2  -2  364.40   25.65 
  -2   2  -2  363.69   25.29 
   2   2   2  373.11   25.90 
  -2  -2  -2  286.56   20.13 
  -2   2  -2  345.38   24.01 
  -2  -2  -2  380.88   27.25 
  -2   2  -2  376.48   26.68 
   2  -2   2  371.49   26.58 
  -2  -2  -2  403.04   29.90 
   2   2   2  361.40   25.17 
   2  -2   2  369.07   26.32 
   2   2   2  369.54   28.21 
   2  -2   2  347.69   25.18 
  -2   2  -2  338.80   24.32 
  -2  -2  -2  399.86   27.83 
  -2   2  -2  368.81   25.53 
  -2   2  -2  377.60   26.13 
  -2  -2  -2  382.21   27.91 
   2  -2   2  369.70   26.96 
  -2  -2  -3 1012.19   71.09 
  -2   2  -3  985.70   68.29 
   2   2   3 1107.86   77.56 
   2  -2   3  974.72   68.99 
   2  -2   3  912.76   64.06 
  -2  -2  -3 1222.57   89.64 
  -2   2  -3  976.36   76.04 
  -2  -2  -3 1012.86   72.24 
  -2   2  -3 1029.60   71.19 
  -2   2  -3  964.51   66.72 
  -2  -2  -3 1087.00   77.25 
  -2   2  -3 1059.74   74.04 
   2  -2   3 1075.12   76.46 
  -2  -2  -3 1144.34   85.72 
   2   2   3 1162.46   81.08 
   2  -2   3 1097.21   77.30 
   2   2   3 1164.39   80.58 
   2  -2   3 1036.18   74.01 
  -2   2  -3  987.83   68.35 
   2  -2   3  923.96   64.55 
  -2  -2  -3 1070.76   76.18 
  -2   2  -3  937.18   69.01 
  -2  -2  -3 1118.78   79.83 
  -2   2  -3 1044.55   73.13 
   2  -2   3 1003.87   70.16 
  -2  -2  -3 1254.77   86.85 
  -2  -2  -3  753.81   66.33 
  -2   2  -3 1120.35   77.46 
  -2   2  -3 1029.69   72.00 
  -2  -2  -3 1208.90   84.64 
  -2  -2  -4  371.52   28.92 
  -2   2  -4  357.18   27.62 
   2   2   4  386.60   30.27 
   2  -2   4  354.72   28.14 
   2  -2   4  443.93   35.74 
  -2  -2  -4  383.34   31.24 
  -2  -2  -4  389.04   30.24 
  -2   2  -4  388.25   29.96 
   2   2   4  340.42   26.28 
  -2   2  -4  380.28   29.36 
  -2  -2  -4  379.97   30.25 
  -2   2  -4  383.49   29.78 
   2   2   4  401.72   31.76 
   2  -2   4  386.75   30.42 
   2   2   4  422.63   32.80 
   2  -2   4  384.08   30.44 
   2   2   4  406.73   31.47 
   2  -2   4  356.76   28.26 
   2  -2   4  342.01   26.62 
  -2  -2  -4  353.64   27.26 
  -2  -2  -4  397.55   31.31 
  -2   2  -4  378.54   29.43 
  -2  -2  -4  371.81   29.93 
  -2   2  -4  379.88   29.29 
  -2  -2  -4  404.48   31.85 
  -2  -2  -4  429.47   33.16 
  -2   2  -4  428.61   33.02 
  -2   2  -4  332.42   26.99 
   2  -2   4  405.12   31.31 
  -2  -2  -4  452.74   34.94 
  -2   2  -4  385.42   29.71 
  -2   2  -4  450.21   34.69 
  -2  -2  -4  427.74   33.41 
  -2   2  -4  383.23   29.88 
  -2  -2  -4  415.85   32.32 
  -2   2  -4  363.44   28.47 
  -2   2  -5  231.01   16.60 
   2  -2   5  228.60   16.81 
   2  -2   5  263.15   19.28 
  -2  -2  -5  255.60   19.36 
  -2  -2  -5  266.22   19.11 
  -2   2  -5  256.03   18.38 
   2   2   5  228.81   16.38 
  -2   2  -5  281.77   20.19 
  -2  -2  -5  278.06   20.62 
  -2   2  -5  256.84   18.66 
   2   2   5  276.71   20.25 
   2  -2   5  278.43   20.61 
   2   2   5  267.52   19.52 
   2  -2   5  257.77   18.59 
   2   2   5  268.45   19.32 
   2   2   5  229.81   16.42 
  -2  -2  -5  285.04   21.02 
  -2   2  -5  277.07   19.85 
  -2  -2  -5  285.43   20.55 
  -2   2  -5  264.75   18.94 
  -2  -2  -5  275.24   20.14 
  -2   2  -5  259.83   18.89 
  -2  -2  -5  275.58   19.83 
  -2   2  -5  263.43   18.84 
  -2   2  -5  285.96   20.43 
   2  -2   5  265.00   19.48 
  -2  -2  -5  294.69   21.13 
  -2   2  -5  270.72   19.35 
  -2  -2  -5  296.43   21.26 
  -2   2  -5  293.43   20.99 
  -2  -2  -5  293.31   21.31 
  -2   2  -5  267.27   19.27 
  -2  -2  -5  290.63   21.11 
  -2   2  -5  279.29   20.29 
   2  -2   6  329.36   24.27 
  -2  -2  -6  336.84   24.19 
  -2   2  -6  331.04   23.82 
  -2   2  -6  344.16   24.70 
   2  -2   6  357.42   26.99 
  -2  -2  -6  323.31   23.44 
   2   2   6  335.05   24.67 
   2   2   6  363.67   26.54 
   2  -2   6  324.63   23.42 
   2   2   6  339.98   24.75 
   2   2   6  300.65   21.54 
  -2  -2  -6  363.09   26.51 
  -2   2  -6  335.96   24.25 
  -2  -2  -6  372.91   26.76 
  -2   2  -6  348.21   25.06 
  -2  -2  -6  351.37   25.55 
  -2   2  -6  347.96   25.21 
  -2  -2  -6  362.52   26.09 
  -2   2  -6  340.79   24.43 
  -2   2  -6  294.92   26.92 
   2  -2   6  336.70   24.17 
  -2  -2  -6  385.83   27.83 
  -2   2  -6  334.93   24.01 
  -2  -2  -6  368.25   26.40 
  -2   2  -6  356.53   25.60 
  -2  -2  -6  343.46   26.04 
  -2   2  -6  340.08   24.69 
  -2  -2  -6  356.22   25.99 
   2   2   7  271.82   28.17 
   2  -2   7  239.12   24.99 
  -2   2  -7  225.88   23.26 
   2  -2   7  268.08   27.87 
  -2  -2  -7  244.01   25.18 
   2   2   7  248.12   25.93 
   2   2   7  242.38   25.31 
   2   2   7  249.10   25.78 
  -2  -2  -7  280.62   28.93 
  -2   2  -7  271.92   27.98 
  -2  -2  -7  263.84   27.13 
  -2   2  -7  249.16   25.61 
  -2  -2  -7  265.30   27.89 
  -2   2  -7  267.24   27.56 
  -2  -2  -7  269.99   27.92 
  -2   2  -7  269.74   27.69 
  -2  -2  -7  276.86   28.58 
  -2   2  -7  280.57   28.79 
  -2  -2  -7  287.22   29.48 
  -2   2  -7  277.86   28.55 
  -2  -2  -7  278.63   28.64 
  -2   2  -7  261.94   27.05 
   2  -2   7  284.63   29.47 
  -2  -2  -7  255.74   27.03 
  -2  -2  -8  203.18   16.20 
  -2   2  -8  209.03   16.55 
  -2  -2  -8  213.80   16.88 
  -2   2  -8  199.47   15.79 
  -2  -2  -8  190.26   15.36 
  -2   2  -8  201.99   16.08 
   2   2   8  176.61   14.20 
  -2   2  -8  203.48   16.13 
  -2  -2  -8  183.25   14.77 
  -2   2  -8  208.04   16.50 
  -2  -2  -8  211.96   16.75 
  -2   2  -8  205.31   16.33 
   2  -2   8  180.85   15.13 
  -2  -2  -8  192.62   15.60 
  -2  -2  -9  114.97    8.49 
  -2   2  -9  117.31    8.60 
  -2  -2  -9  102.42    7.49 
  -2   2  -9  116.18    8.52 
  -2  -2  -9  122.81    9.00 
  -2   2  -9  121.23    8.91 
  -2   2  -9   92.97    6.83 
  -2  -2  -9   97.16    7.38 
  -2   2  -9   98.18    7.32 
  -2   2  -9   63.13   16.83 
  -2  -2  -9  123.31    9.00 
  -2   2  -9  114.98    8.45 
   2  -2   9  114.92    8.43 
  -2  -2  -9  103.09    7.74 
   2  -2  10   94.35   12.09 
  -2  -2 -10   83.80   10.67 
  -2   2 -10   84.90   10.79 
  -2  -2 -10   84.65   10.78 
  -2   2 -10   82.26   10.45 
  -2   2 -10   61.83    9.23 
  -2  -2 -10   72.19    9.18 
  -2   2 -10   81.48   10.35 
  -2  -2 -10   68.30    8.76 
   2   3 -11   27.35    4.57 
   2   3 -11   30.87    4.36 
   2   3 -11   28.21    4.68 
   2   3 -11   34.83    4.90 
   2   3 -11   28.08    4.66 
   2  -3 -11   24.31    4.10 
   2  -3 -10  262.08   22.42 
   2   3 -10  281.83   24.25 
  -2  -3  10  295.58   26.69 
   2  -3 -10  234.00   20.17 
   2   3 -10  274.34   23.78 
   2   3 -10  267.90   23.26 
   2  -3 -10  270.49   23.08 
   2   3 -10  270.22   23.26 
   2   3 -10  260.72   22.54 
   2   3 -10  362.46   31.02 
   2  -3 -10  250.06   21.51 
   2   3  -9   13.82    1.07 
   2  -3  -9   11.74    1.11 
   2  -3  -9   13.99    1.20 
   2   3  -9   15.05    1.34 
   2  -3  -9   12.07    1.04 
   2   3  -9   13.27    1.32 
   2  -3  -9   11.31    1.40 
   2   3  -9   11.19    1.03 
   2   3  -9   14.28    1.31 
   2  -3  -9   12.09    1.52 
   2   3  -9   11.02    1.13 
   2   3  -9   10.61    1.15 
   2   3  -9   15.08    1.35 
   2  -3  -9   11.15    0.97 
   2  -3  -9   11.99    1.40 
   2  -3  -8   68.15    5.97 
   2   3  -8   57.37    4.75 
  -2  -3   8   62.24    5.45 
  -2   3   8   58.23    4.93 
   2   3  -8   57.94    5.61 
  -2  -3   8   58.47    5.27 
   2  -3  -8   55.04    4.85 
   2  -3  -8   57.57    5.05 
  -2   3   8   63.45    5.62 
   2   3  -8   68.40    5.58 
   2  -3  -8   61.86    5.30 
   2  -3  -8   62.96    5.27 
   2   3  -8   67.41    5.59 
   2  -3  -8   60.27    5.04 
   2   3  -8   69.83    5.83 
   2  -3  -8   64.36    5.65 
   2   3  -8   64.45    5.34 
   2   3  -8   72.80    6.00 
   2  -3  -8   65.81    5.64 
   2   3  -8   63.67    5.48 
   2   3  -8   67.93    5.62 
   2   3  -8   64.89    5.42 
   2  -3  -8   65.50    5.44 
   2  -3  -8   62.19    5.31 
   2  -3  -7  283.97   24.95 
   2   3  -7  250.92   21.30 
  -2  -3   7  258.23   22.58 
  -2   3   7  252.69   21.69 
   2   3  -7  264.39   22.77 
  -2  -3   7  276.23   25.13 
   2  -3  -7  254.87   22.55 
   2  -3  -7  253.20   22.63 
   2  -3  -7  267.38   24.03 
   2   3  -7  255.43   23.15 
   2  -3  -7  281.99   24.75 
   2  -3  -7  262.32   22.61 
   2   3  -7  278.39   23.86 
   2  -3  -7  263.70   22.43 
   2   3  -7  265.71   22.76 
   2  -3  -7  265.64   24.25 
   2   3  -7  239.92   21.36 
   2   3  -7  285.25   24.75 
   2   3  -7  278.06   23.62 
   2  -3  -7  287.19   24.28 
   2   3  -7  260.23   22.60 
   2   3  -7  286.26   24.80 
   2   3  -7  278.51   24.01 
   2  -3  -7  247.91   22.37 
   2  -3  -7  277.90   24.52 
   2  -3  -6  352.19   23.35 
  -2   3   6  313.71   19.61 
   2   3  -6  341.80   21.50 
  -2  -3   6  328.64   22.64 
  -2   3   6  299.85   19.75 
   2   3  -6  326.66   22.04 
  -2  -3   6  338.77   23.63 
   2  -3  -6  345.78   23.98 
   2  -3  -6  361.95   26.48 
   2  -3  -6  338.75   23.46 
   2   3  -6  361.04   22.62 
   2  -3  -6  282.32   18.08 
   2  -3  -6  369.93   25.43 
   2  -3  -6  335.29   22.10 
   2   3  -6  340.48   21.83 
   2  -3  -6  308.37   19.84 
   2   3  -6  353.06   22.51 
   2  -3  -6  379.28   27.26 
   2   3  -6  310.56   20.56 
   2   3  -6  346.33   22.70 
   2   3  -6  366.33   23.00 
   2  -3  -6  466.59   31.30 
   2   3  -6  340.89   21.69 
   2   3  -6  375.42   23.79 
   2   3  -6  383.07   24.18 
   2  -3  -6  373.84   23.37 
   2  -3  -6  357.68   24.19 
   2   3  -5  321.94   25.63 
  -2  -3   5  336.36   28.06 
  -2  -3   5  327.92   27.94 
   2  -3  -5  360.29   32.26 
  -2   3   5  307.53   23.78 
   2   3  -5  303.01   27.82 
  -2  -3   5  426.76   34.98 
  -2   3   5  362.15   28.17 
   2   3  -5  330.61   26.43 
   2   3  -5  355.50   28.16 
  -2  -3   5  344.59   29.24 
   2  -3  -5  313.72   25.43 
   2  -3  -5  408.63   35.07 
   2  -3  -5  361.77   30.07 
   2  -3  -5  362.62   31.29 
   2   3  -5  320.47   26.85 
   2  -3  -5  388.64   31.24 
   2  -3  -5  344.67   27.79 
   2   3  -5  362.09   28.30 
   2   3  -5  345.32   26.89 
   2  -3  -5  379.18   32.22 
   2   3  -5  330.99   26.74 
   2   3  -5  354.09   28.20 
   2   3  -5  379.30   29.32 
   2  -3  -5  364.58   29.24 
   2   3  -5  316.70   27.42 
   2   3  -5  338.83   26.86 
   2   3  -5  351.77   27.46 
   2  -3  -5  398.32   30.77 
   2  -3  -5  365.40   30.50 
  -2   3   4  363.52   26.52 
   2   3  -4  398.51   28.99 
   2  -3  -4  375.94   29.54 
  -2  -3   4  399.76   30.61 
  -2  -3   4  446.08   34.20 
   2  -3  -4  464.51   37.24 
  -2   3   4  427.13   30.31 
   2   3  -4  391.22   29.64 
  -2  -3   4  441.29   33.09 
  -2   3   4  409.25   31.65 
   2   3  -4  416.18   30.41 
   2   3  -4  415.98   30.01 
  -2  -3   4  433.51   32.68 
   2  -3  -4  394.10   29.15 
   2  -3  -4  428.17   35.14 
   2  -3  -4  437.44   34.48 
   2  -3  -4  454.71   35.00 
   2   3  -4  384.60   27.38 
  -2  -3   4  395.33   28.47 
   2   3  -4  433.20   30.60 
  -2  -3   4  452.90   35.58 
   2   3  -4  390.60   28.46 
   2   3  -4  455.61   32.30 
   2   3  -4  422.06   30.40 
   2   3  -4  416.00   31.08 
   2   3  -4  389.90   27.64 
  -2   3   3 2709.73  191.41 
   2   3  -3 2848.17  206.56 
   2  -3  -3 2804.79  201.81 
  -2  -3   3 2874.27  238.71 
  -2  -3   3 1996.67  203.51 
   2  -3  -3 2825.45  220.98 
  -2   3   3 2871.05  199.10 
   2   3  -3 2482.01  202.92 
  -2  -3   3 3401.01  261.47 
   2   3  -3 3060.55  213.97 
   2  -3  -3 2485.49  171.78 
  -2   3   3 2584.57  181.60 
   2   3  -3 2685.86  189.16 
  -2  -3   3 2809.12  211.60 
   2  -3  -3 2577.76  186.78 
   2  -3  -3 2922.39  226.10 
   2  -3  -3 3047.77  237.42 
   2  -3  -3 2988.28  250.93 
   2   3  -3 2590.78  180.28 
   2  -3  -3 2662.86  186.20 
   2  -3  -3 2961.01  216.24 
   2  -3  -3 2719.69  197.92 
   2   3  -3 2609.61  187.03 
   2  -3  -3 2894.82  215.86 
   2   3  -3 2830.41  196.51 
   2   3  -3 2804.91  194.77 
   2   3  -3 2509.37  180.03 
   2   3  -3 2781.26  194.75 
   2  -3  -3 2968.97  206.07 
   2  -3  -3 2912.04  220.75 
  -2   3   2  900.03   62.99 
   2   3  -2  909.74   65.68 
   2  -3  -2  989.12   69.78 
  -2  -3   2  911.38   71.89 
   2  -3  -2  911.21   69.83 
  -2  -3   2  818.65   70.11 
  -2   3   2  927.67   64.47 
   2   3  -2  834.63   59.36 
  -2  -3   2 1072.36   79.30 
   2   3  -2  825.38   63.45 
   2  -3  -2  841.75   58.21 
  -2   3   2  929.28   65.58 
   2   3  -2  846.32   95.36 
  -2  -3   2  964.15   72.65 
   2  -3  -2  862.56   62.42 
   2  -3  -2  943.94   73.98 
  -2  -3   2  802.78   63.55 
   2  -3  -2  956.44   74.46 
   2   3  -2  932.06   65.48 
   2  -3  -2  966.06   71.19 
   2   3  -2  883.54   61.38 
  -2  -3   2  981.79   70.40 
   2  -3  -2  974.85   73.75 
  -2   3   1 3739.70  343.28 
   2   3  -1 3488.84  328.34 
   2  -3  -1 4044.09  373.26 
  -2  -3   1 3418.33  350.07 
   2  -3  -1 3565.92  353.72 
  -2  -3   1 3390.27  360.15 
  -2   3   1 3332.57  311.81 
   2   3  -1 3100.63  305.88 
  -2  -3   1 3498.77  337.51 
  -2   3   1 3497.11  317.87 
  -2   3   1 3111.13  283.42 
   2   3  -1 3683.10  336.60 
  -2   3   1 3367.39  314.98 
   2   3  -1 3552.16  335.36 
  -2  -3   1 3865.74  368.75 
   2  -3  -1 3831.79  358.87 
   2  -3  -1 3726.07  364.01 
  -2  -3   1 3336.60  316.75 
   2   3  -1 3451.15  333.53 
   2  -3  -1 4225.46  413.42 
   2   3  -1 3351.66  330.21 
   2  -3  -1 3734.95  357.87 
  -2   3   0  733.16   51.53 
   2   3   0  698.56   49.32 
   2  -3   0  759.08   54.11 
  -2  -3   0  705.11   52.06 
   2  -3   0  703.20   52.95 
  -2  -3   0  709.33   63.11 
  -2   3   0  649.51   45.09 
   2   3   0  653.78   45.53 
  -2  -3   0  670.36   49.65 
  -2   3   0  708.38   49.11 
  -2   3   0  641.05   45.22 
   2   3   0  627.63   47.64 
  -2  -3   0  685.03   48.54 
  -2   3   0  752.86   52.28 
   2  -3   0  733.90   53.88 
  -2  -3   0  570.81   42.53 
   2  -3   0  722.87   55.27 
  -2  -3   0  616.25   54.25 
   2   3   0  675.94   54.47 
   2  -3   0  732.70   57.56 
   2   3   0  771.09   54.01 
   2  -3   0  707.52   55.33 
  -2   3   0  632.86   44.52 
   2   3   0  625.70   45.10 
   2  -3   0  660.03   48.02 
  -2  -3   0  649.85   48.67 
  -2  -3   0  602.50   43.74 
   2   3   0  606.42   43.50 
   2  -3   0  725.46   53.89 
  -2   3  -1  649.13   45.07 
   2   3   1  667.50   48.25 
   2  -3   1  684.05   48.29 
  -2  -3  -1  664.91   50.25 
   2  -3   1  647.48   51.80 
  -2  -3  -1  597.26   56.47 
  -2   3  -1  647.44   44.94 
   2   3   1  531.47   38.83 
  -2  -3  -1  682.12   50.10 
  -2   3  -1  694.11   48.10 
  -2   3  -1  562.71   39.87 
   2   3   1  595.24   43.10 
  -2   3  -1  619.94   46.42 
   2  -3   1  695.00   50.09 
  -2  -3  -1  658.88   50.46 
   2  -3   1  690.92   52.29 
  -2  -3  -1  642.22   58.89 
   2   3   1  693.12   49.58 
   2  -3   1  669.08   49.95 
   2   3   1  666.22   46.77 
   2  -3   1  636.95   49.06 
  -2   3  -1  605.82   42.32 
   2   3   1  596.20   43.24 
   2  -3   1  644.04   45.24 
  -2  -3  -1  602.15   45.45 
  -2   3  -1  606.06   41.92 
  -2  -3  -1  743.52   52.06 
   2  -3   1  730.04   53.57 
  -2  -3  -1  646.74   45.52 
  -2  -3  -1  666.72   48.40 
  -2  -3  -1  738.20   51.68 
  -2   3  -1  650.66   45.56 
   2   3   1  692.84   49.35 
   2  -3   1  623.68   47.99 
  -2  -3  -2  261.86   19.51 
  -2   3  -2  248.79   18.13 
   2   3   2  266.09   19.28 
   2  -3   2  246.42   19.36 
   2  -3   2  235.57   18.66 
  -2  -3  -2  273.35   22.11 
  -2   3  -2  231.03   16.90 
  -2  -3  -2  248.05   18.58 
  -2   3  -2  276.92   19.66 
   2   3   2  240.16   18.15 
  -2   3  -2  275.49   19.57 
   2  -3   2  280.75   20.96 
  -2  -3  -2  269.82   20.50 
   2  -3   2  266.72   20.56 
  -2  -3  -2  262.11   20.60 
   2   3   2  279.60   20.44 
   2   3   2  283.41   20.28 
   2  -3   2  254.13   19.80 
   2   3   2  245.64   18.15 
   2  -3   2  247.12   17.84 
  -2  -3  -2  266.99   20.43 
  -2  -3  -2  268.20   20.47 
  -2   3  -2  249.84   17.90 
  -2  -3  -2  283.96   20.99 
  -2   3  -2  217.87   20.75 
   2  -3   2  251.58   18.11 
  -2  -3  -2  290.05   20.71 
  -2   3  -2  263.12   18.62 
  -2   3  -2  264.40   18.72 
  -2   3  -2  236.59   16.94 
   2   3   2  240.60   17.02 
   2  -3   2  278.00   20.55 
  -2  -3  -2  263.77   19.48 
  -2  -3  -3  110.34    9.05 
  -2   3  -3  107.66    8.46 
   2   3   3  118.56    9.58 
   2  -3   3  107.50    8.88 
   2  -3   3  110.23    9.14 
  -2  -3  -3  104.26    8.99 
  -2   3  -3  103.98    8.10 
  -2  -3  -3  110.52    8.76 
  -2   3  -3  110.78    8.66 
   2   3   3   90.49    7.52 
  -2   3  -3   97.36    7.74 
   2  -3   3  115.28    9.26 
  -2  -3  -3  103.61    8.56 
   2  -3   3  106.83    8.96 
  -2  -3  -3  103.68    9.17 
   2   3   3  105.56    8.72 
   2  -3   3  109.70    9.11 
   2   3   3  119.37    9.40 
   2  -3   3  105.08    8.43 
  -2   3  -3  101.51    7.95 
   2   3   3   91.32    7.44 
   2  -3   3   98.46    7.95 
  -2  -3  -3  114.49    8.89 
  -2  -3  -3  103.78    8.41 
  -2   3  -3  102.91    8.49 
  -2  -3  -3  104.81    8.33 
  -2   3  -3   98.79    7.74 
  -2  -3  -3  109.94    8.89 
  -2   3  -3  105.41    8.27 
  -2  -3  -3  124.24    9.65 
  -2   3  -3   93.85    7.41 
  -2   3  -3  117.00    9.06 
   2  -3   3   96.49    7.62 
  -2  -3  -3  114.77    9.00 
  -2   3  -3  107.10    8.29 
  -2   3  -3  108.02    8.57 
  -2  -3  -3  109.60    8.81 
  -2   3  -3   97.68    7.64 
   2   3   3   97.25    7.52 
   2  -3   3  110.93    9.09 
  -2  -3  -3  108.95    9.03 
  -2  -3  -4   67.87    4.48 
  -2   3  -4   63.77    4.19 
   2   3   4   63.96    4.26 
   2  -3   4   63.23    4.32 
   2  -3   4   75.52    5.30 
  -2  -3  -4   68.88    4.80 
  -2   3  -4   69.34    4.42 
  -2  -3  -4   70.35    4.74 
  -2   3  -4   71.93    4.63 
   2   3   4   58.47    3.77 
  -2   3  -4   54.71    3.65 
   2  -3   4   79.99    5.63 
  -2  -3  -4   69.60    5.00 
   2  -3   4   76.48    5.44 
  -2  -3  -4   67.84    4.88 
   2   3   4   72.45    4.99 
   2  -3   4   69.50    4.83 
   2   3   4   70.98    4.70 
  -2   3  -4   61.60    4.04 
   2  -3   4   65.70    4.32 
  -2   3  -4   70.03    4.39 
  -2  -3  -4   81.26    5.13 
  -2  -3  -4   75.51    5.08 
  -2   3  -4   74.72    4.92 
  -2  -3  -4   78.07    5.15 
  -2   3  -4   72.74    4.62 
  -2  -3  -4   74.42    5.22 
  -2   3  -4   73.21    4.70 
  -2  -3  -4   84.67    5.43 
  -2   3  -4   74.83    4.73 
  -2   3  -4   73.03    4.60 
  -2  -3  -4   80.61    5.15 
  -2   3  -4   67.88    4.33 
  -2  -3  -4   79.13    5.56 
  -2   3  -4   68.72    4.57 
   2   3   4   63.28    3.98 
   2  -3   4   86.72    5.94 
  -2  -3  -4   80.70    5.47 
  -2   3  -5   96.99    8.31 
   2  -3   5   91.66    8.11 
   2  -3   5  107.22    9.68 
  -2  -3  -5  108.84    9.87 
  -2   3  -5  106.26    9.09 
   2   3   5   86.24    7.39 
  -2   3  -5  102.42    8.78 
   2  -3   5  110.41    9.77 
  -2  -3  -5  103.40    9.20 
   2   3   5  109.77   10.09 
   2  -3   5  103.92    9.45 
   2   3   5  114.15   10.43 
   2  -3   5  102.00    8.85 
   2   3   5  110.00    9.58 
  -2   3  -5   96.14    8.18 
   2  -3   5   97.30    8.46 
  -2  -3  -5  114.76   10.32 
  -2   3  -5  116.92   10.15 
  -2  -3  -5  120.59   10.50 
  -2   3  -5  108.86    9.32 
  -2  -3  -5  125.49   10.95 
  -2   3  -5  117.24   10.16 
  -2  -3  -5  103.42    8.84 
  -2   3  -5  114.08    9.67 
  -2   3  -5  108.93    9.69 
  -2  -3  -5  118.37   10.07 
  -2   3  -5  132.12   11.19 
  -2   3  -5  127.39   10.79 
  -2  -3  -5  120.49   10.44 
  -2   3  -5  117.71   10.10 
   2  -3   5  116.05   10.43 
  -2  -3  -5  111.25    9.90 
   2  -3   6   30.36    3.12 
  -2  -3  -6   35.58    3.34 
  -2   3  -6   34.29    3.17 
  -2   3  -6   36.68    3.25 
   2  -3   6   32.82    3.14 
  -2  -3  -6   34.29    3.22 
   2   3   6   36.92    3.42 
   2  -3   6   32.48    3.13 
   2   3   6   34.17    3.13 
   2   3   6   36.66    3.44 
   2   3   6   34.42    2.84 
  -2  -3  -6   36.37    3.19 
  -2   3  -6   40.03    3.41 
  -2  -3  -6   45.19    3.83 
  -2   3  -6   36.40    3.09 
  -2  -3  -6   39.67    3.54 
  -2   3  -6   38.41    3.52 
  -2  -3  -6   39.27    3.43 
  -2   3  -6   36.45    3.06 
  -2   3  -6   38.45    3.20 
  -2  -3  -6   36.74    3.62 
  -2   3  -6   36.67    3.09 
  -2   3  -6   40.73    3.52 
  -2  -3  -6   38.34    3.37 
  -2   3  -6   37.83    3.20 
   2  -3   6   36.26    3.33 
  -2  -3  -6   37.74    3.41 
   2   3   7   50.93    3.50 
  -2  -3  -7   50.94    3.66 
  -2   3  -7   50.54    3.61 
  -2  -3  -7   55.90    3.89 
  -2   3  -7   52.98    3.68 
  -2  -3  -7   49.35    3.63 
  -2   3  -7   52.18    3.67 
  -2  -3  -7   52.90    3.95 
  -2   3  -7   50.39    3.46 
  -2   3  -7   56.54    3.83 
  -2  -3  -7   53.42    4.22 
  -2   3  -7   52.55    4.60 
  -2   3  -7   55.54    3.88 
  -2  -3  -7   55.21    3.90 
  -2   3  -7   54.25    3.82 
   2  -3   7   54.06    3.96 
  -2  -3  -7   51.60    3.78 
   2  -3   8   68.36    6.30 
  -2  -3  -8   64.33    5.64 
  -2  -3  -8   61.05    5.29 
  -2   3  -8   63.06    5.45 
  -2  -3  -8   59.15    5.20 
  -2   3  -8   59.93    5.28 
   2   3   8   53.53    4.76 
  -2   3  -8   56.98    5.44 
  -2  -3  -8   54.95    4.96 
  -2   3  -8   62.00    5.31 
  -2   3  -8   60.58    5.30 
  -2  -3  -8   66.14    5.77 
  -2   3  -8   53.18    4.62 
   2  -3   8   51.32    4.70 
  -2  -3  -8   55.24    4.90 
   2  -3   9  130.56   17.34 
  -2  -3  -9  113.46   14.93 
  -2   3  -9  113.14   14.90 
  -2  -3  -9  100.12   14.00 
  -2   3  -9   99.02   13.14 
   2   3   9   97.85   12.91 
  -2   3  -9  125.51   16.50 
  -2  -3  -9  107.31   14.20 
  -2   3  -9  117.51   15.44 
  -2   3  -9  132.07   20.99 
  -2  -3  -9  127.64   16.78 
  -2   3  -9  114.96   15.12 
  -2  -3  -9  101.48   13.51 
   2   4 -11   23.03    3.28 
   2   4 -11   21.97    3.11 
   2   4 -11   20.47    2.94 
   2   4 -11   22.31    3.16 
  -2  -4  11   24.67    3.68 
   2  -4 -10   89.70    6.72 
   2  -4 -10  110.09    8.09 
   2   4 -10  109.11    8.02 
  -2  -4  10  109.60    8.32 
   2  -4 -10   90.03    6.82 
   2   4 -10  103.57    7.79 
   2   4 -10  119.36    8.81 
   2  -4 -10  101.42    7.50 
   2   4 -10  101.54    7.66 
   2   4 -10  113.79    8.39 
   2  -4 -10  100.59    7.48 
   2   4  -9  539.90   46.42 
   2  -4  -9  486.76   43.25 
   2  -4  -9  535.53   45.91 
   2   4  -9  543.30   46.58 
  -2  -4   9  515.04   45.80 
   2  -4  -9  490.82   43.08 
   2   4  -9  477.75   44.78 
   2   4  -9  563.97   50.04 
   2  -4  -9  512.27   43.69 
   2   4  -9  520.48   45.11 
   2   4  -9  508.09   44.52 
   2   4  -9  540.12   46.49 
   2  -4  -9  500.87   43.81 
   2  -4  -9  490.41   43.07 
   2   4  -8  535.58   37.69 
   2  -4  -8  629.82   47.56 
   2  -4  -8  648.27   45.02 
   2   4  -8  635.52   43.57 
  -2  -4   8  606.92   45.19 
   2  -4  -8  611.18   41.02 
   2  -4  -8  615.52   45.74 
   2   4  -8  604.77   42.64 
   2   4  -8  643.95   43.73 
   2  -4  -8  640.78   44.08 
   2   4  -8  617.27   42.00 
   2   4  -8  649.24   44.75 
   2   4  -8  634.37   43.07 
   2  -4  -8  676.77   46.52 
   2  -4  -8  634.42   44.39 
   2  -4  -7  145.74   12.07 
   2   4  -7  150.98   12.45 
  -2  -4   7  138.69   11.80 
  -2   4   7  143.41   11.78 
   2   4  -7  130.72   10.86 
  -2  -4   7  136.58   11.65 
   2  -4  -7  137.04   11.53 
   2  -4  -7  127.26   11.22 
   2  -4  -7  141.72   12.26 
   2   4  -7  149.95   12.51 
   2  -4  -7  145.50   12.55 
   2  -4  -7  147.68   12.45 
   2   4  -7  152.95   12.57 
  -2  -4   7  141.72   12.38 
   2  -4  -7  138.26   11.39 
   2  -4  -7  149.58   13.00 
   2   4  -7  151.04   12.27 
   2   4  -7  149.20   12.24 
   2   4  -7  130.44   16.00 
   2  -4  -7  150.76   12.77 
   2   4  -7  151.40   12.62 
   2   4  -7  147.36   12.36 
   2   4  -7  158.27   13.01 
   2  -4  -7  164.95   13.50 
   2  -4  -7  143.24   12.18 
   2  -4  -6  437.45   37.87 
  -2   4   6  447.35   37.82 
   2   4  -6  398.19   36.06 
  -2  -4   6  453.65   39.15 
  -2   4   6  471.87   41.17 
   2   4  -6  465.41   40.25 
  -2  -4   6  476.96   43.05 
   2  -4  -6  476.04   41.53 
   2  -4  -6  438.39   38.82 
   2  -4  -6  463.91   40.86 
   2   4  -6  472.45   41.25 
   2  -4  -6  501.29   46.79 
   2  -4  -6  470.30   41.10 
   2   4  -6  470.30   40.40 
  -2  -4   6  505.35   44.80 
   2  -4  -6  461.50   39.43 
   2  -4  -6  470.45   45.62 
   2   4  -6  483.85   41.20 
   2   4  -6  429.27   37.45 
   2   4  -6  521.88   46.40 
   2  -4  -6  503.88   44.13 
   2   4  -6  471.20   41.08 
   2   4  -6  483.49   42.01 
   2   4  -6  481.32   41.72 
   2  -4  -6  430.53   42.88 
   2  -4  -6  490.70   44.79 
   2   4  -5  135.82    8.69 
  -2  -4   5  148.26   10.53 
   2  -4  -5  170.60   11.73 
  -2   4   5  144.88    9.17 
   2   4  -5  160.10   10.11 
  -2  -4   5  147.16    9.87 
  -2   4   5  154.58    9.78 
   2   4  -5  143.80    9.43 
  -2  -4   5  161.87   11.05 
   2  -4  -5  167.26   11.82 
   2  -4  -5  149.70   10.33 
   2  -4  -5  162.58   11.83 
   2   4  -5  138.18    8.68 
  -2  -4   5  141.86    9.11 
   2   4  -5  146.13    9.40 
   2  -4  -5  141.82    8.87 
   2  -4  -5  169.63   12.61 
   2  -4  -5  154.96   10.45 
   2   4  -5  154.97   10.01 
  -2  -4   5  161.38   10.71 
   2  -4  -5  139.39    8.95 
   2  -4  -5  152.76   10.85 
   2   4  -5  142.34    9.64 
   2   4  -5  138.08    9.23 
   2  -4  -5  152.98   10.81 
   2   4  -5  146.38    9.46 
   2   4  -5  153.13    9.91 
   2   4  -5  176.39   11.37 
   2  -4  -5  143.35    9.18 
   2  -4  -5  157.02   11.22 
  -2   4   4   98.23    8.93 
   2   4  -4   98.30    8.97 
   2  -4  -4   94.54    8.90 
  -2  -4   4   99.67    9.55 
  -2  -4   4   90.60    8.72 
   2  -4  -4  101.38    9.90 
  -2   4   4  104.79    9.48 
   2   4  -4  108.19    9.75 
  -2  -4   4  108.79   10.14 
  -2   4   4  110.02    9.92 
   2   4  -4  103.73    9.65 
  -2  -4   4  106.65   10.32 
   2  -4  -4  108.34   10.53 
   2  -4  -4  111.61   10.88 
   2  -4  -4  104.99   10.16 
   2   4  -4  102.12    9.26 
  -2  -4   4  100.59    9.26 
   2  -4  -4  101.19    9.17 
   2  -4  -4  107.66   10.23 
   2  -4  -4  108.76   10.67 
   2   4  -4  108.91    9.88 
  -2  -4   4   99.26   10.23 
   2  -4  -4  101.47    9.36 
   2  -4  -4  114.73   10.98 
   2   4  -4  108.59    9.82 
   2   4  -4  100.04    9.05 
   2   4  -4  116.67   10.49 
   2  -4  -4  109.80   10.67 
   2   4  -4  103.46    9.38 
   2   4  -4  111.84   10.15 
   2   4  -4  137.72   12.49 
   2   4  -4  102.44    9.25 
   2  -4  -4  112.70   10.79 
  -2   4   3  118.35    9.51 
   2   4  -3  127.71   10.21 
   2  -4  -3  117.87    9.93 
  -2  -4   3  133.95   11.22 
  -2  -4   3  115.74    9.98 
   2  -4  -3  125.14   11.39 
  -2   4   3  105.83    8.26 
   2   4  -3  107.46    9.29 
  -2  -4   3  127.61   10.34 
  -2   4   3  130.28   10.18 
   2   4  -3  119.09    9.86 
   2   4  -3  117.12    9.35 
  -2  -4   3  130.11   10.92 
   2  -4  -3  139.21   11.56 
   2  -4  -3  124.24   11.36 
   2  -4  -3  133.62   11.93 
  -2   4   3  105.75    8.27 
   2   4  -3  121.27    9.65 
  -2  -4   3  124.28   10.45 
   2   4  -3  119.23    9.34 
   2  -4  -3  130.53   10.93 
  -2  -4   3  104.67    8.15 
   2  -4  -3  127.36   10.43 
   2   4  -3  131.56   10.47 
  -2  -4   3  138.75   11.35 
   2  -4  -3  131.98   10.86 
   2   4  -3  113.67    9.33 
   2   4  -3  126.31    9.93 
  -2   4   3  118.68    9.27 
   2   4  -3   94.05   11.49 
   2  -4  -3  133.84   11.13 
   2   4  -3  116.94    9.19 
   2   4  -3  121.05    9.46 
  -2  -4   3  145.06   11.64 
   2   4  -3  117.66    9.11 
   2  -4  -3  130.53   10.65 
   2  -4  -3  136.47   11.65 
  -2   4   2 3039.23  222.47 
   2   4  -2 2584.31  188.55 
   2  -4  -2 2692.14  282.58 
  -2  -4   2 2816.03  231.58 
   2  -4  -2 2698.38  218.39 
  -2  -4   2 2587.92  198.35 
  -2   4   2 2623.53  192.46 
   2   4  -2 2478.20  189.77 
  -2  -4   2 2733.18  203.13 
  -2   4   2 2799.99  203.80 
   2   4  -2 2795.13  202.41 
  -2   4   2 2492.81  181.45 
   2   4  -2 2643.25  194.85 
  -2  -4   2 2729.07  209.98 
   2  -4  -2 2658.65  194.90 
   2  -4  -2 3020.25  241.63 
   2  -4  -2 2834.14  222.77 
   2  -4  -2 2871.66  228.54 
  -2   4   2 2760.54  199.07 
   2   4  -2 2704.10  193.54 
  -2  -4   2 2794.64  204.00 
  -2   4   2 2746.70  194.14 
   2   4  -2 2536.40  188.71 
   2   4  -2 2495.86  178.98 
   2  -4  -2 2773.52  216.53 
  -2  -4   2 2430.41  177.11 
   2  -4  -2 2984.00  227.69 
   2   4  -2 2988.77  213.51 
  -2  -4   2 2839.10  210.87 
   2  -4  -2 2807.87  212.75 
   2   4  -2 2647.49  195.38 
  -2   4   2 2876.09  204.55 
   2   4  -2 2647.92  190.28 
   2  -4  -2 2905.07  217.79 
   2   4  -2 2848.14  204.72 
  -2  -4   2 3175.88  239.16 
   2   4  -2 2745.08  197.38 
   2  -4  -2 2880.99  212.66 
   2  -4  -2 2928.77  229.22 
  -2   4   1 1740.46  125.53 
   2   4  -1 1668.91  120.58 
   2  -4  -1 1716.96  133.74 
  -2  -4   1 1702.31  130.78 
   2  -4  -1 1606.49  125.81 
  -2  -4   1 1551.71  121.57 
  -2   4   1 1373.86   98.20 
   2   4  -1 1640.01  116.61 
  -2  -4   1 1606.57  120.36 
  -2   4   1 1698.61  121.99 
   2   4  -1 1622.95  115.50 
  -2   4   1 1677.42  120.85 
  -2  -4   1 1645.92  123.48 
   2  -4  -1 1550.95  112.50 
   2  -4  -1 1645.20  128.48 
  -2  -4   1 1468.20  111.48 
   2  -4  -1 1678.66  132.03 
   2   4  -1 1405.14  105.38 
  -2   4   1 1589.64  114.95 
   2  -4  -1 1665.83  128.56 
  -2   4   1 1545.47  111.34 
   2   4  -1 1454.10  104.96 
   2  -4  -1 1365.39  102.30 
   2  -4  -1 1429.89  129.08 
  -2  -4   1 1653.43  122.72 
   2   4  -1 1610.86  114.16 
  -2   4   1 1794.33  126.86 
   2  -4  -1 1659.98  126.14 
  -2  -4   1 1754.67  128.22 
   2   4  -1 1495.57  112.37 
   2  -4  -1 1473.33  117.36 
   2  -4  -1 1713.99  131.09 
  -2   4   0  241.84   17.36 
   2   4   0  220.10   16.37 
   2  -4   0  229.99   17.12 
  -2  -4   0  214.68   16.53 
   2  -4   0  206.33   16.84 
  -2  -4   0  211.78   17.96 
  -2   4   0  212.93   15.36 
   2   4   0  221.89   16.23 
  -2  -4   0  210.57   15.36 
  -2   4   0  182.89   13.74 
   2   4   0  234.96   16.74 
  -2   4   0  239.59   17.05 
   2  -4   0  221.83   16.42 
  -2  -4   0  215.18   17.20 
   2  -4   0  226.12   19.09 
  -2  -4   0  194.12   16.79 
   2   4   0  219.40   17.06 
   2  -4   0  223.11   17.79 
   2   4   0  214.09   16.25 
   2  -4   0  226.44   17.78 
  -2   4   0  226.85   16.35 
   2   4   0  223.80   16.58 
   2  -4   0  227.76   16.76 
  -2  -4   0  217.31   16.97 
  -2   4   0  248.15   17.55 
   2   4   0  211.89   15.06 
   2   4   0  230.29   16.39 
   2  -4   0  242.68   18.14 
  -2  -4   0  213.51   16.15 
  -2  -4   0  237.43   18.08 
  -2  -4   0  188.34   15.42 
   2   4   0  229.00   16.23 
  -2   4   0  256.61   18.47 
   2  -4   0  236.40   17.53 
  -2   4   0  248.16   17.56 
  -2  -4   0  262.76   19.79 
   2   4   0  236.59   18.74 
   2  -4   0  199.00   14.91 
   2  -4   0  247.38   19.46 
  -2   4  -1  222.37   17.37 
   2   4   1  241.31   19.75 
   2  -4   1  228.85   18.46 
  -2  -4  -1  239.39   21.01 
   2  -4   1  227.14   18.18 
  -2  -4  -1  225.56   19.36 
  -2   4  -1  196.18   15.35 
   2   4   1  178.79   13.85 
  -2  -4  -1  222.09   17.79 
  -2   4  -1  211.78   16.57 
   2   4   1  191.34   14.96 
   2  -4   1  201.90   18.78 
  -2  -4  -1  240.66   20.46 
   2  -4   1  214.67   17.66 
  -2  -4  -1  194.77   16.53 
   2   4   1  207.73   17.92 
   2  -4   1  224.71   19.04 
   2   4   1  207.27   17.97 
   2  -4   1  195.17   16.15 
  -2   4  -1  216.90   16.96 
   2   4   1  210.85   16.70 
   2  -4   1  224.45   17.80 
  -2  -4  -1  201.23   16.09 
  -2   4  -1  183.02   14.41 
  -2  -4  -1  251.35   19.41 
   2  -4   1  220.57   17.77 
  -2  -4  -1  215.67   17.38 
  -2  -4  -1  203.82   16.30 
   2  -4   1  202.24   16.26 
  -2  -4  -1  213.46   17.39 
  -2  -4  -1  174.41   16.31 
   2   4   1  193.42   14.95 
  -2   4  -1  205.16   15.97 
  -2   4  -1  222.08   17.14 
   2  -4   1  195.32   15.68 
  -2  -4  -1  187.22   14.60 
  -2   4  -1  213.40   16.47 
  -2  -4  -1  183.72   17.25 
   2   4   1  186.03   14.64 
   2  -4   1  210.93   17.22 
  -2  -4  -1  181.50   14.55 
  -2  -4  -2  355.63   34.55 
  -2   4  -2  348.74   31.54 
   2   4   2  345.65   33.44 
   2  -4   2  333.07   31.22 
   2  -4   2  357.99   33.21 
  -2  -4  -2  346.53   34.11 
  -2   4  -2  346.36   31.10 
  -2  -4  -2  353.20   32.07 
  -2   4  -2  353.91   31.77 
   2   4   2  319.06   29.95 
  -2   4  -2  347.16   31.46 
   2  -4   2  353.46   32.76 
  -2  -4  -2  358.46   33.20 
   2  -4   2  342.12   32.60 
  -2  -4  -2  326.15   31.95 
   2   4   2  337.54   32.10 
   2  -4   2  348.94   32.77 
   2   4   2  347.95   32.58 
   2  -4   2  320.35   30.29 
  -2   4  -2  344.94   31.06 
   2   4   2  337.74   30.78 
   2  -4   2  344.79   31.69 
  -2  -4  -2  327.60   30.70 
  -2   4  -2  327.66   29.42 
  -2  -4  -2  385.33   34.85 
   2  -4   2  374.75   35.47 
  -2  -4  -2  346.33   32.47 
  -2  -4  -2  344.65   31.08 
  -2  -4  -2  353.00   32.88 
  -2  -4  -2  395.57   35.72 
   2   4   2  301.59   27.01 
  -2   4  -2  356.94   31.94 
  -2   4  -2  213.61   47.76 
   2  -4   2  292.48   26.65 
  -2  -4  -2  331.24   29.91 
  -2   4  -2  357.49   32.01 
  -2   4  -2  329.50   29.69 
  -2  -4  -2  363.77   33.42 
  -2   4  -2  296.22   26.81 
   2   4   2  271.28   25.81 
   2  -4   2  346.11   32.73 
  -2  -4  -2  317.48   29.22 
  -2  -4  -3  586.97   38.33 
  -2   4  -3  611.84   38.83 
   2   4   3  629.35   41.45 
   2  -4   3  588.64   39.85 
   2  -4   3  623.12   42.27 
  -2  -4  -3  612.27   42.73 
  -2   4  -3  633.97   39.63 
  -2   4  -3  636.67   40.59 
   2   4   3  577.22   39.96 
  -2   4  -3  699.15   43.64 
   2  -4   3  639.12   42.37 
  -2  -4  -3  629.83   40.92 
   2  -4   3  616.32   42.32 
   2   4   3  604.11   40.84 
   2  -4   3  609.33   40.66 
   2   4   3  654.88   42.78 
  -2   4  -3  623.57   39.50 
   2   4   3  599.55   38.93 
   2  -4   3  598.34   39.32 
  -2  -4  -3  576.05   37.55 
  -2   4  -3  636.84   39.64 
  -2  -4  -3  718.22   45.30 
   2  -4   3  734.11   48.70 
  -2  -4  -3  622.48   41.89 
  -2  -4  -3  663.19   42.05 
  -2   4  -3  592.10   37.46 
  -2  -4  -3  628.89   43.48 
  -2   4  -3  630.40   41.08 
  -2  -4  -3  673.55   45.30 
  -2   4  -3  651.14   40.55 
  -2   4  -3  715.98   44.55 
  -2  -4  -3  624.86   38.89 
  -2   4  -3  674.37   41.97 
  -2   4  -3  671.70   42.39 
  -2  -4  -3  670.48   44.39 
  -2   4  -3  588.68   37.30 
   2   4   3  593.95   36.96 
   2  -4   3  650.02   44.35 
  -2  -4  -3  597.26   40.64 
  -2  -4  -4   21.99    2.11 
  -2   4  -4   21.20    2.07 
   2  -4   4   24.14    2.44 
   2  -4   4   24.90    2.54 
  -2  -4  -4   26.24    2.70 
  -2   4  -4   25.40    2.30 
  -2   4  -4   22.20    2.09 
  -2   4  -4   26.38    2.60 
   2  -4   4   24.51    3.12 
  -2  -4  -4   25.27    2.57 
   2  -4   4   22.88    2.33 
  -2  -4  -4   22.58    2.57 
   2   4   4   23.90    2.36 
   2   4   4   21.86    2.29 
  -2   4  -4   22.62    2.03 
   2  -4   4   22.83    2.12 
  -2  -4  -4   23.03    2.09 
  -2   4  -4   28.47    2.46 
  -2  -4  -4   28.07    2.63 
   2  -4   4   21.59    2.50 
  -2  -4  -4   24.41    2.29 
  -2  -4  -4   18.23    2.06 
  -2   4  -4   20.72    1.88 
  -2  -4  -4   27.16    2.58 
  -2   4  -4   25.53    2.30 
  -2  -4  -4   23.80    2.30 
  -2   4  -4   21.53    1.93 
  -2   4  -4   24.37    2.28 
  -2  -4  -4   23.97    2.40 
  -2   4  -4   24.04    2.23 
  -2   4  -4   24.22    2.26 
  -2  -4  -4   25.31    2.41 
  -2   4  -4   22.97    2.20 
   2   4   4   21.01    2.00 
   2  -4   4   20.84    2.12 
  -2  -4  -4   23.01    2.39 
  -2   4  -5  260.87   21.24 
   2  -4   5  266.98   22.09 
   2  -4   5  281.72   23.53 
  -2  -4  -5  278.74   23.26 
  -2   4  -5  271.32   22.31 
   2   4   5  287.23   23.26 
  -2   4  -5  306.10   24.80 
   2  -4   5  289.30   24.03 
  -2  -4  -5  284.23   23.53 
   2   4   5  297.99   25.51 
   2  -4   5  275.20   23.10 
   2   4   5  284.76   24.02 
   2   4   5  283.94   23.93 
  -2   4  -5  247.83   21.01 
   2  -4   5  273.90   23.10 
  -2   4  -5  297.75   24.08 
   2   4   5  292.88   23.87 
   2  -4   5  343.51   29.70 
  -2  -4  -5  293.57   24.87 
  -2  -4  -5  325.93   26.48 
  -2   4  -5  305.00   25.02 
  -2  -4  -5  332.11   27.32 
  -2   4  -5  297.93   24.38 
  -2  -4  -5  347.57   28.45 
  -2   4  -5  315.08   25.48 
  -2   4  -5  337.98   27.34 
  -2  -4  -5  307.31   24.87 
  -2   4  -5  327.73   26.52 
  -2   4  -5  307.24   25.07 
  -2  -4  -5  329.96   27.50 
  -2   4  -5  296.01   24.21 
   2   4   5  280.94   22.73 
   2  -4   5  305.13   26.21 
  -2  -4  -5  292.74   24.88 
   2  -4   6  638.66   46.65 
  -2  -4  -6  644.69   44.79 
  -2  -4  -6  640.78   43.37 
  -2   4  -6  636.22   43.26 
  -2  -4  -6  660.38   46.15 
  -2   4  -6  650.62   44.31 
  -2  -4  -6  683.59   46.48 
  -2   4  -6  665.25   44.41 
  -2   4  -6  590.35   56.67 
  -2  -4  -6  626.23   42.32 
  -2   4  -6  597.38   39.92 
  -2   4  -6  664.06   44.98 
  -2  -4  -6  683.86   46.64 
   2  -4   6  620.29   44.86 
  -2  -4  -6  629.11   43.97 
   2   4   7  187.02   15.94 
   2  -4   7  189.69   16.85 
  -2  -4  -7  181.53   15.79 
  -2  -4  -7  182.27   15.57 
  -2   4  -7  180.30   15.49 
  -2  -4  -7  180.83   15.62 
  -2   4  -7  187.26   16.05 
  -2  -4  -7  183.20   16.18 
  -2   4  -7  203.81   17.33 
  -2   4  -7  164.19   18.49 
  -2  -4  -7  175.78   15.21 
  -2   4  -7  179.34   15.28 
  -2   4  -7  187.63   16.13 
  -2  -4  -7  185.04   16.09 
  -2   4  -7  173.62   14.89 
   2  -4   7  163.62   14.26 
  -2  -4  -7  180.53   15.92 
   2  -4   8  137.20   10.69 
  -2  -4  -8  144.04   10.62 
  -2   4  -8  137.07   10.05 
  -2  -4  -8  145.56   10.70 
  -2   4  -8  145.60   10.91 
   2   4   8  132.53    9.94 
  -2   4  -8  151.13   11.01 
  -2   4  -8  154.46   11.22 
  -2  -4  -8  125.49    9.50 
  -2   4  -8  148.60   10.86 
  -2   4  -8  149.12   11.55 
  -2  -4  -8  143.74   10.64 
  -2   4  -8  138.15   10.16 
  -2  -4  -8  131.54    9.86 
   2  -4   9  130.60   16.71 
  -2  -4  -9  123.80   15.74 
  -2   4  -9  117.30   14.88 
   2  -4   9  121.49   15.71 
  -2  -4  -9  128.52   16.33 
  -2   4  -9  124.16   15.76 
  -2  -4  -9  105.91   13.61 
  -2   4  -9  113.67   14.97 
  -2   4  -9   93.38   12.46 
  -2  -4  -9  109.85   14.03 
   2  -5 -10    9.09    1.44 
   2  -5 -10    9.83    1.56 
   2   5 -10   10.06    1.54 
   2  -5 -10    8.11    1.45 
   2   5 -10   10.68    1.59 
   2   5 -10    8.01    1.42 
   2  -5 -10   10.09    1.84 
   2   5 -10    9.27    1.40 
   2   5 -10    5.11    1.43 
  -2  -5  10   11.68    2.05 
   2  -5 -10    9.65    1.64 
   2   5  -9   71.33    5.22 
   2  -5  -9   57.29    4.60 
   2  -5  -9   62.13    4.66 
   2   5  -9   59.35    5.03 
  -2  -5   9   60.34    4.88 
   2  -5  -9   56.05    4.50 
   2   5  -9   61.75    4.63 
   2   5  -9   66.62    4.97 
   2  -5  -9   60.22    4.67 
   2   5  -9   58.96    4.49 
   2   5  -9   63.51    4.79 
  -2  -5   9   65.02    5.08 
  -2   5   9   49.15    3.72 
   2  -5  -9   56.18    4.35 
   2   5  -8   39.06    3.39 
   2  -5  -8   31.57    3.02 
   2  -5  -8   36.19    3.21 
   2   5  -8   32.86    3.00 
  -2  -5   8   34.04    3.24 
   2  -5  -8   31.73    3.11 
   2   5  -8   32.53    2.87 
   2   5  -8   39.40    3.44 
   2  -5  -8   35.24    3.24 
   2   5  -8   34.81    3.15 
   2   5  -8   39.87    3.53 
   2   5  -8   35.26    3.19 
   2  -5  -8   39.31    3.54 
   2  -5  -8   38.39    3.54 
   2   5  -7  607.25   40.55 
   2  -5  -7  563.23   40.15 
   2  -5  -7  552.19   38.48 
   2   5  -7  563.26   38.48 
   2  -5  -7  540.25   36.39 
   2  -5  -7  522.18   39.19 
  -2   5   7  460.92   30.90 
   2   5  -7  345.50   41.82 
   2   5  -7  549.41   37.81 
   2   5  -7  529.02   37.45 
   2  -5  -7  416.77   29.66 
   2   5  -7  516.88   36.74 
   2   5  -7  574.68   39.25 
   2   5  -7  520.64   35.59 
   2  -5  -7  621.76   42.03 
   2  -5  -7  532.83   38.11 
   2  -5  -6  486.10   39.46 
   2   5  -6  526.99   42.12 
  -2  -5   6  559.85   45.38 
  -2   5   6  539.82   43.34 
   2   5  -6  489.69   39.56 
  -2  -5   6  532.97   43.25 
   2  -5  -6  500.24   40.62 
   2  -5  -6  501.21   41.28 
   2  -5  -6  499.58   42.74 
   2   5  -6  570.47   45.92 
   2  -5  -6  498.39   46.16 
   2  -5  -6  562.96   46.63 
   2   5  -6  521.39   42.93 
  -2  -5   6  542.74   45.78 
   2  -5  -6  527.21   42.35 
   2  -5  -6  537.58   46.74 
   2   5  -6  573.95   46.23 
   2   5  -6  523.46   42.62 
   2   5  -6  613.60   48.96 
   2  -5  -6  536.28   44.65 
   2   5  -6  514.66   41.88 
   2   5  -6  545.61   44.19 
   2   5  -6  487.42   39.94 
   2  -5  -6  611.41   49.74 
   2  -5  -6  575.11   48.20 
   2   5  -5   86.86    6.47 
  -2  -5   5   89.16    7.08 
   2  -5  -5   95.09   10.29 
  -2   5   5   85.99    9.15 
   2   5  -5  101.01   10.72 
  -2  -5   5  100.61   10.89 
  -2   5   5  107.53   11.45 
   2   5  -5   97.62    7.31 
  -2  -5   5   83.52    7.15 
   2  -5  -5   92.93   10.14 
   2  -5  -5   90.91    7.17 
   2  -5  -5   93.12    7.85 
   2   5  -5   93.83    9.98 
  -2  -5   5   95.48    7.47 
  -2   5   5   87.47    9.28 
   2   5  -5   99.35    7.42 
   2  -5  -5  107.30   11.85 
   2  -5  -5  105.91    8.12 
   2   5  -5  108.14    7.89 
  -2  -5   5  114.46    8.65 
   2  -5  -5  105.56   11.25 
   2  -5  -5  109.84    9.00 
   2   5  -5   77.98    9.19 
   2   5  -5   80.30   10.52 
   2  -5  -5  101.61   10.93 
   2   5  -5  101.76    7.66 
   2   5  -5  105.85   11.27 
  -2  -5   5  118.04   13.11 
   2  -5  -5  101.12   10.94 
   2  -5  -5  109.78   11.89 
   2   5  -4   31.50    2.83 
   2  -5  -4   30.32    2.93 
  -2  -5   4   32.66    3.31 
   2  -5  -4   32.87    3.18 
  -2   5   4   31.09    2.85 
   2   5  -4   30.48    2.74 
  -2  -5   4   30.77    3.12 
  -2   5   4   30.75    2.86 
   2   5  -4   27.63    2.52 
  -2  -5   4   30.16    3.45 
   2  -5  -4   30.06    3.40 
   2  -5  -4   30.56    3.38 
   2  -5  -4   25.32    3.06 
   2   5  -4   30.29    2.66 
  -2  -5   4   30.85    2.78 
  -2   5   4   25.67    2.29 
   2   5  -4   30.98    2.72 
   2  -5  -4   33.78    3.09 
  -2  -5   4   26.61    2.42 
   2  -5  -4   32.74    3.04 
   2   5  -4   30.21    2.70 
  -2  -5   4   31.07    2.97 
   2  -5  -4   31.73    2.86 
   2  -5  -4   30.77    2.98 
   2   5  -4   29.33    2.56 
   2   5  -4   25.18    2.22 
   2   5  -4   29.15    2.74 
   2  -5  -4   27.91    2.62 
   2   5  -4   26.74    2.36 
   2   5  -4   28.26    2.56 
  -2  -5   4   29.70    3.19 
   2   5  -4   31.12    2.69 
   2  -5  -4   24.99    2.87 
   2  -5  -4   29.88    3.14 
  -2   5   3  147.96   10.77 
   2   5  -3  141.63   10.48 
   2  -5  -3  139.31   10.51 
  -2  -5   3  137.87   10.53 
  -2  -5   3  133.21   10.14 
   2  -5  -3  139.70   11.13 
  -2   5   3  126.29    9.49 
   2   5  -3  147.57   10.68 
  -2  -5   3  158.16   11.70 
  -2   5   3  135.07   10.14 
   2   5  -3  115.05    9.56 
   2   5  -3  126.31    9.39 
  -2  -5   3  136.21   10.53 
   2  -5  -3  133.36   10.60 
   2  -5  -3  134.80   10.68 
   2  -5  -3  145.57   11.10 
  -2   5   3  138.33   10.08 
   2   5  -3  139.80   10.29 
   2  -5  -3  141.16   10.82 
  -2  -5   3  144.39   11.36 
  -2   5   3  126.39    9.37 
   2   5  -3  144.35   10.38 
   2  -5  -3  151.92   11.90 
  -2  -5   3  123.68    9.13 
   2  -5  -3  144.63   11.07 
   2   5  -3  147.99   10.74 
  -2  -5   3  145.77   11.19 
   2  -5  -3  138.67   10.31 
   2  -5  -3  137.25   10.57 
   2   5  -3  147.99   10.66 
   2   5  -3  142.53   10.43 
   2  -5  -3  164.81   12.48 
   2   5  -3  135.31    9.81 
  -2  -5   3  153.13   11.56 
   2   5  -3  116.70    9.57 
   2  -5  -3  161.15   11.71 
   2  -5  -3  145.37   11.23 
   2   5  -2 1143.62   73.98 
   2  -5  -2 1037.73   73.56 
  -2  -5   2 1021.94   73.87 
   2  -5  -2  984.30   66.95 
  -2  -5   2  935.36   62.83 
  -2   5   2 1019.96   63.68 
   2   5  -2 1067.14   67.16 
  -2  -5   2 1051.04   67.28 
  -2   5   2  988.61   64.71 
   2   5  -2 1028.87   68.59 
  -2  -5   2  966.15   68.77 
   2  -5  -2  977.10   68.44 
   2  -5  -2  973.60   69.77 
   2  -5  -2  962.32   66.68 
  -2   5   2  983.94   63.63 
   2   5  -2 1059.86   70.04 
   2  -5  -2  990.03   69.11 
  -2  -5   2 1035.12   77.11 
  -2   5   2  992.28   63.27 
   2   5  -2  978.79   62.68 
   2  -5  -2  964.97   65.73 
   2  -5  -2 1030.30   77.05 
  -2  -5   2  855.21   56.54 
  -2  -5   2  978.51   62.75 
  -2  -5   2 1067.67   70.95 
   2  -5  -2  982.87   65.94 
   2  -5  -2  958.23   65.23 
   2   5  -2  824.68   82.72 
   2  -5  -2 1014.63   67.85 
  -2  -5   2 1049.60   73.64 
   2   5  -2 1028.93   64.56 
   2  -5  -2 1045.40   66.73 
   2  -5  -2  999.89   71.89 
  -2   5   1  109.53    7.13 
   2   5  -1  110.48    7.28 
   2  -5  -1  115.46    7.93 
  -2  -5   1  111.56    7.65 
   2  -5  -1  111.25    8.39 
  -2  -5   1   93.99    6.75 
  -2   5   1  106.71    6.85 
  -2  -5   1   96.76    6.28 
  -2   5   1   95.75    6.06 
   2   5  -1  103.70    6.96 
  -2  -5   1  103.38    7.69 
   2  -5  -1  100.96    7.28 
   2  -5  -1   98.85    6.92 
   2  -5  -1   98.71    7.09 
  -2   5   1  111.38    7.09 
   2   5  -1  108.31    7.24 
   2  -5  -1  112.56    7.68 
  -2  -5   1  112.64    7.64 
  -2   5   1   99.19    6.32 
   2   5  -1  104.16    6.75 
   2   5  -1  106.96    6.73 
   2  -5  -1  109.02    7.48 
  -2  -5   1  100.42    6.68 
  -2  -5   1   98.25    6.50 
   2  -5  -1   95.89    6.35 
  -2  -5   1  109.28    7.41 
   2  -5  -1   86.20    5.44 
  -2   5   1   88.14    5.57 
   2   5  -1  101.24    6.38 
  -2   5   1  104.83    6.71 
   2  -5  -1  101.73    6.76 
  -2  -5   1   90.37    7.00 
   2   5  -1  108.57    6.89 
   2  -5  -1   95.96    7.18 
   2  -5  -1  106.84    7.68 
  -2   5   0  939.12   59.79 
   2   5   0 1035.17   67.50 
   2  -5   0  983.75   67.95 
  -2  -5   0 1010.95   69.49 
   2  -5   0  995.20   70.11 
  -2  -5   0  889.61   65.09 
  -2   5   0  891.13   58.82 
   2   5   0  884.15   58.58 
  -2   5   0  972.43   60.63 
   2   5   0 1027.80   64.33 
  -2   5   0 1017.09   63.70 
  -2  -5   0  968.01   64.38 
   2  -5   0  934.86   67.67 
  -2  -5   0  900.82   61.38 
   2  -5   0  938.88   62.86 
   2  -5   0  900.66   59.52 
  -2   5   0 1017.52   64.26 
   2   5   0 1035.80   68.26 
   2  -5   0 1060.35   71.78 
  -2  -5   0 1002.53   70.18 
  -2   5   0  754.77   47.50 
   2   5   0  891.36   57.00 
   2   5   0 1037.57   64.98 
   2  -5   0 1079.27   72.08 
  -2  -5   0  975.01   65.30 
  -2  -5   0  954.96   60.98 
   2  -5   0 1064.23   72.18 
  -2  -5   0 1019.96   73.47 
   2   5   0  959.90   63.44 
  -2   5   0 1101.52   70.23 
   2  -5   0  943.43   62.75 
  -2  -5   0 1100.33   72.19 
   2   5   0  965.61   68.00 
   2  -5   0  870.35   62.56 
   2  -5   0  978.44   69.64 
  -2   5  -1  304.26   22.17 
   2   5   1  294.34   21.72 
   2  -5   1  317.94   24.25 
  -2  -5  -1  282.03   21.06 
   2  -5   1  280.97   22.27 
  -2  -5  -1  278.53   21.74 
  -2   5  -1  275.72   19.80 
   2   5   1  266.16   19.11 
   2   5   1  286.96   20.65 
  -2   5  -1  289.92   20.79 
   2  -5   1  245.01   17.91 
  -2  -5  -1  271.55   20.61 
   2  -5   1  275.29   21.49 
  -2  -5  -1  219.83   18.97 
   2   5   1  253.25   18.72 
   2  -5   1  262.02   19.85 
   2   5   1  249.56   19.01 
  -2   5  -1  286.81   21.04 
   2   5   1  288.53   21.56 
   2  -5   1  287.68   22.44 
  -2  -5  -1  259.01   21.52 
  -2   5  -1  252.40   18.10 
   2   5   1  276.09   19.90 
   2  -5   1  288.77   22.90 
  -2  -5  -1  263.74   20.41 
  -2  -5  -1  261.85   19.17 
   2  -5   1  230.16   20.68 
  -2  -5  -1  277.30   21.15 
  -2  -5  -1  279.09   20.49 
  -2   5  -1  185.31   19.80 
   2   5   1  275.80   19.74 
  -2   5  -1  303.42   21.72 
  -2   5  -1  277.83   19.87 
  -2  -5  -1  275.18   20.53 
   2   5   1  267.16   19.19 
   2  -5   1  209.74   20.75 
  -2  -5  -1  238.19   17.73 
  -2  -5  -2  151.52   14.06 
  -2   5  -2  180.41   15.54 
   2   5   2  171.72   15.20 
   2  -5   2  151.21   15.14 
   2  -5   2  165.56   14.83 
  -2  -5  -2  165.37   14.52 
  -2   5  -2  142.58   12.57 
   2   5   2  162.75   14.25 
  -2   5  -2  168.72   14.44 
   2  -5   2  160.89   14.04 
  -2  -5  -2  172.42   15.40 
   2  -5   2  158.68   14.25 
  -2  -5  -2  151.83   13.70 
   2   5   2  168.29   14.80 
   2  -5   2  154.58   13.29 
   2   5   2  167.32   14.46 
  -2   5  -2  174.81   15.09 
   2   5   2  173.94   15.23 
   2  -5   2  165.13   15.56 
  -2  -5  -2  166.69   14.71 
  -2   5  -2  172.44   14.59 
   2  -5   2  188.71   17.52 
  -2  -5  -2  174.16   15.48 
  -2  -5  -2  164.85   14.11 
   2  -5   2  152.32   14.81 
  -2  -5  -2  172.29   15.98 
  -2  -5  -2  174.80   15.06 
  -2   5  -2  155.34   13.18 
   2   5   2  169.25   14.32 
  -2   5  -2  145.26   14.84 
  -2   5  -2  177.00   15.30 
  -2  -5  -2  150.50   12.88 
  -2   5  -2  150.83   14.98 
  -2  -5  -2  169.67   15.49 
  -2   5  -2  153.79   13.11 
   2   5   2  156.41   14.04 
   2  -5   2  168.00   15.03 
  -2  -5  -2  155.18   13.33 
  -2  -5  -3  115.87   12.41 
  -2   5  -3  115.86   12.30 
   2   5   3  121.25   12.93 
   2  -5   3  118.08   13.02 
   2  -5   3  119.24   12.91 
  -2  -5  -3  121.18   13.13 
  -2   5  -3  111.86   11.88 
   2   5   3  123.97   13.26 
  -2   5  -3  126.01   13.30 
   2  -5   3  115.86   12.46 
  -2  -5  -3  130.24   14.07 
   2  -5   3  122.90   13.38 
  -2  -5  -3  116.82   12.69 
   2   5   3  116.91   12.55 
   2   5   3  119.69   12.99 
  -2   5  -3  123.83   13.09 
   2   5   3  121.52   13.01 
   2  -5   3  122.64   13.16 
  -2  -5  -3  123.71   13.10 
  -2   5  -3  125.31   13.17 
   2  -5   3  134.39   15.16 
  -2  -5  -3  126.49   13.82 
  -2  -5  -3  123.65   13.08 
   2  -5   3  133.03   14.87 
  -2  -5  -3  130.78   14.16 
  -2  -5  -3  135.64   14.39 
   2   5   3  113.90   11.98 
  -2   5  -3  131.87   13.86 
  -2   5  -3  124.09   13.21 
  -2  -5  -3  114.60   12.07 
  -2   5  -3  110.19   11.74 
  -2  -5  -3  121.39   13.66 
  -2   5  -3  117.70   12.45 
   2   5   3  119.95   12.63 
   2  -5   3  119.55   13.11 
  -2  -5  -3  123.19   13.17 
  -2   5  -4   43.56    3.65 
   2  -5   4   40.64    3.65 
   2  -5   4   42.27    3.83 
  -2  -5  -4   41.16    3.82 
  -2   5  -4   39.79    3.32 
   2   5   4   42.58    3.56 
  -2   5  -4   42.20    3.59 
   2  -5   4   44.10    4.23 
  -2  -5  -4   45.35    4.22 
   2  -5   4   37.72    3.62 
  -2  -5  -4   37.93    3.52 
   2   5   4   40.87    3.51 
   2   5   4   42.29    3.75 
  -2   5  -4   42.55    3.48 
   2  -5   4   42.10    3.77 
  -2  -5  -4   43.56    3.55 
  -2   5  -4   44.13    3.58 
   2   5   4   36.85    3.02 
   2  -5   4   46.42    4.41 
  -2  -5  -4   43.53    3.87 
  -2  -5  -4   43.37    3.56 
   2  -5   4   40.64    3.70 
  -2  -5  -4   43.34    3.79 
  -2  -5  -4   46.59    4.04 
  -2   5  -4   40.11    3.71 
  -2   5  -4   38.71    4.01 
  -2  -5  -4   40.13    3.40 
  -2   5  -4   40.51    3.35 
  -2   5  -4   40.37    3.30 
  -2  -5  -4   42.79    3.90 
  -2   5  -4   42.16    3.51 
   2   5   4   38.44    3.17 
   2  -5   4   36.90    3.46 
  -2  -5  -4   40.98    3.56 
  -2   5  -5  721.79   49.08 
   2  -5   5  735.74   53.27 
  -2   5  -5  805.72   53.79 
   2   5   5  876.18   59.96 
   2  -5   5  826.39   61.35 
  -2  -5  -5  766.92   55.17 
  -2   5  -5  705.81   47.47 
   2  -5   5  782.75   55.25 
  -2  -5  -5  755.90   52.09 
  -2  -5  -5  764.96   55.56 
  -2   5  -5  822.92   54.91 
  -2   5  -5  836.37   56.52 
  -2  -5  -5  735.56   49.08 
  -2   5  -5  775.33   54.85 
  -2   5  -5  768.20   51.86 
  -2  -5  -5  842.15   57.52 
  -2   5  -5  733.04   49.53 
   2   5   5  723.86   50.51 
   2  -5   5  699.14   50.42 
  -2  -5  -5  724.42   50.82 
   2   5   6   75.45    6.47 
   2  -5   6   77.52    7.29 
  -2  -5  -6   65.79    5.90 
  -2   5  -6   69.39    6.00 
   2  -5   6   79.51    7.36 
  -2  -5  -6   72.40    6.26 
  -2  -5  -6   70.00    6.32 
  -2   5  -6   75.94    6.61 
  -2   5  -6   82.13    7.04 
  -2  -5  -6   71.43    6.50 
  -2   5  -6   75.15    6.68 
  -2   5  -6   70.24    6.44 
  -2  -5  -6   75.45    6.55 
  -2   5  -6   70.87    6.18 
   2  -5   6   62.94    5.71 
  -2  -5  -6   70.75    6.29 
   2   5   7  373.83   27.21 
  -2  -5  -7  358.47   26.44 
  -2   5  -7  330.73   24.11 
   2  -5   7  355.05   27.31 
  -2  -5  -7  348.26   25.81 
  -2  -5  -7  342.40   27.85 
  -2   5  -7  356.13   27.41 
  -2   5  -7  404.69   66.39 
  -2  -5  -7  333.08   25.03 
  -2   5  -7  380.59   27.66 
  -2   5  -7  304.28   23.72 
  -2  -5  -7  368.25   27.27 
  -2   5  -7  339.58   24.83 
  -2  -5  -7  329.00   24.63 
   2  -5   8   29.94    3.95 
  -2  -5  -8   28.34    4.04 
   2  -5   8   27.16    4.08 
  -2  -5  -8   30.06    3.90 
   2   5   8   22.14    3.28 
  -2   5  -8   30.13    3.90 
  -2   5  -8   31.99    4.09 
  -2  -5  -8   26.40    3.81 
  -2   5  -8   29.85    3.85 
  -2   5  -8   29.16    4.10 
  -2  -5  -8   30.17    3.89 
  -2   5  -8   26.98    3.80 
  -2  -5  -8   25.04    3.77 
   2   6  -9   16.99    2.46 
   2  -6  -9   14.92    2.34 
   2  -6  -9   18.27    2.64 
   2   6  -9   15.30    2.25 
   2  -6  -9   14.26    2.22 
   2   6  -9   16.28    2.36 
   2   6  -9   14.04    2.11 
   2  -6  -9   13.92    2.14 
   2   6  -9   14.36    2.09 
   2   6  -9   16.56    2.37 
  -2  -6   9    6.59    1.55 
   2  -6  -9   13.98    2.26 
   2   6  -8   35.68    2.66 
   2  -6  -8   31.29    2.55 
   2  -6  -8   32.62    2.52 
   2   6  -8   35.19    2.69 
  -2  -6   8   22.28    2.30 
   2  -6  -8   30.17    2.59 
   2   6  -8   29.71    2.31 
   2   6  -8   37.87    2.84 
   2  -6  -8   33.34    2.73 
   2   6  -8   30.52    2.45 
   2   6  -8   33.34    2.58 
  -2  -6   8   32.00    3.03 
  -2   6   8   31.76    2.42 
   2  -6  -8   30.70    2.63 
   2   6  -7   33.40    2.91 
   2  -6  -7   31.98    2.98 
   2  -6  -7   27.24    2.53 
   2   6  -7   30.97    2.81 
  -2  -6   7   29.19    2.85 
   2  -6  -7   29.36    2.80 
  -2   6   7   26.62    2.39 
   2   6  -7   25.50    2.39 
   2   6  -7   28.25    2.51 
   2   6  -7   37.00    3.26 
   2  -6  -7   27.62    2.66 
   2   6  -7   26.83    2.40 
  -2  -6   7   36.83    3.54 
   2  -6  -7   36.23    3.39 
   2  -6  -7   29.79    2.83 
   2   6  -6   83.76    6.65 
  -2  -6   6   77.60    6.26 
   2   6  -6   83.48    6.77 
   2  -6  -6   76.78    6.75 
   2  -6  -6   85.24    7.02 
  -2  -6   6   72.33    6.15 
   2  -6  -6   76.78    6.20 
   2  -6  -6   74.91    6.84 
  -2   6   6   55.33    4.67 
   2   6  -6   74.81    6.08 
   2   6  -6   86.80    6.94 
   2  -6  -6   73.22    6.00 
   2   6  -6   64.41    5.29 
   2   6  -6   67.38    5.42 
  -2  -6   6   68.77    5.83 
   2  -6  -6   71.38    7.86 
   2  -6  -6   73.83    6.28 
   2   6  -5  217.01   22.48 
  -2  -6   5  194.46   20.61 
  -2   6   5  224.95   23.49 
   2   6  -5  229.05   24.64 
   2  -6  -5  222.01   24.29 
   2  -6  -5  234.23   24.74 
   2   6  -5  235.95   24.35 
  -2  -6   5  236.62   25.09 
   2  -6  -5  232.37   24.09 
   2  -6  -5  221.10   24.18 
  -2   6   5  212.31   22.33 
   2   6  -5  139.94   20.42 
   2   6  -5  212.37   21.99 
   2   6  -5  236.77   26.49 
   2  -6  -5  215.72   22.72 
   2   6  -5  206.88   21.53 
   2   6  -5  215.93   22.26 
  -2  -6   5  236.60   24.99 
   2  -6  -5  218.02   27.42 
   2  -6  -5  239.64   25.23 
   2   6  -4  271.68   21.90 
  -2  -6   4  259.93   21.56 
   2  -6  -4  240.34   19.53 
  -2   6   4  259.99   20.76 
   2   6  -4  236.80   20.00 
  -2   6   4  247.18   20.31 
  -2  -6   4  251.16   20.64 
   2  -6  -4  258.47   21.04 
   2  -6  -4  224.43   20.50 
   2   6  -4  284.22   23.35 
   2  -6  -4  264.47   21.33 
  -2  -6   4  277.05   24.33 
  -2   6   4  273.93   21.86 
   2   6  -4  289.32   23.32 
   2  -6  -4  277.89   23.56 
   2  -6  -4  287.93   24.06 
  -2  -6   4  279.63   23.15 
  -2  -6   4  274.05   22.78 
   2  -6  -4  281.61   22.81 
   2  -6  -4  259.55   22.71 
  -2   6   4  270.93   21.64 
   2   6  -4  283.43   22.95 
   2   6  -4  299.84   23.97 
   2  -6  -4  271.07   22.27 
  -2  -6   4  284.61   23.47 
   2   6  -4  240.76   19.21 
   2  -6  -4  326.93   26.38 
   2  -6  -4  269.90   23.02 
   2   6  -3  194.11   15.88 
   2  -6  -3  170.86   14.65 
  -2  -6   3  175.19   14.80 
   2  -6  -3  185.52   15.43 
   2   6  -3  173.84   14.79 
  -2   6   3  200.79   16.43 
  -2  -6   3  184.68   15.49 
   2  -6  -3  179.75   14.95 
   2  -6  -3  175.84   14.93 
   2  -6  -3  175.65   15.08 
  -2   6   3  198.58   16.33 
   2   6  -3  201.87   16.78 
   2  -6  -3  205.46   17.74 
  -2  -6   3  197.14   16.80 
  -2   6   3  199.80   16.22 
   2   6  -3  196.67   16.66 
   2  -6  -3  185.20   16.28 
  -2  -6   3  169.48   14.29 
   2  -6  -3  198.40   16.56 
  -2  -6   3  188.45   15.52 
  -2  -6   3  196.76   16.84 
   2  -6  -3  201.10   16.59 
   2  -6  -3  177.44   15.44 
  -2   6   3  194.74   15.91 
   2   6  -3  202.70   16.60 
   2   6  -3  162.40   17.85 
   2  -6  -3  187.60   15.69 
  -2  -6   3  211.37   17.96 
   2   6  -3  206.31   16.75 
   2  -6  -3  203.49   17.80 
   2  -6  -3  190.78   16.18 
  -2   6   2  125.66   13.31 
   2   6  -2  127.92   13.64 
   2  -6  -2  119.68   12.82 
  -2  -6   2  115.63   12.56 
   2  -6  -2  118.43   12.83 
  -2   6   2  124.08   13.15 
   2   6  -2  131.08   13.83 
  -2   6   2  119.96   12.72 
   2   6  -2  118.92   12.64 
  -2  -6   2  115.42   12.41 
   2  -6  -2  115.33   12.42 
   2  -6  -2  110.54   11.94 
  -2   6   2  129.52   13.78 
   2   6  -2  134.25   14.50 
   2  -6  -2  130.82   14.35 
  -2  -6   2  131.45   14.59 
  -2   6   2  130.80   13.81 
   2   6  -2   83.27   10.78 
   2  -6  -2  105.98   11.73 
   2  -6  -2  128.75   14.12 
  -2  -6   2  113.96   12.41 
  -2  -6   2  122.41   13.07 
  -2  -6   2  127.03   13.74 
   2  -6  -2  127.06   13.74 
   2  -6  -2  110.75   11.90 
  -2   6   2  128.02   13.49 
   2   6  -2   99.75   10.58 
  -2   6   2  108.06   11.98 
   2  -6  -2  118.46   12.86 
  -2  -6   2  132.31   14.58 
   2   6  -2  109.75   14.11 
   2  -6  -2  110.68   13.32 
   2  -6  -2  126.08   13.73 
  -2   6   1  143.60   15.27 
   2   6  -1  139.78   14.87 
   2  -6  -1  142.92   15.42 
  -2  -6   1  134.98   14.57 
   2  -6  -1  134.38   14.41 
  -2  -6   1   95.38   11.11 
  -2   6   1  126.63   13.64 
   2   6  -1  145.75   15.36 
  -2   6   1  142.68   15.04 
   2   6  -1  143.67   15.16 
  -2  -6   1  134.41   14.40 
   2  -6  -1  131.75   14.43 
   2  -6  -1  120.42   13.06 
  -2   6   1  137.96   14.70 
   2   6  -1  145.02   15.64 
   2  -6  -1  147.45   16.03 
  -2  -6   1  144.56   15.89 
  -2   6   1  105.75   16.00 
   2   6  -1  134.71   14.54 
   2   6  -1  127.30   13.45 
   2  -6  -1  145.80   16.05 
  -2  -6   1  131.35   14.32 
  -2  -6   1  133.34   14.12 
   2  -6  -1  140.09   15.07 
  -2  -6   1  146.58   15.94 
  -2   6   1  150.25   15.80 
   2   6  -1  148.50   15.71 
  -2   6   1  150.31   15.90 
   2  -6  -1  127.55   13.71 
  -2  -6   1  145.79   15.69 
   2   6  -1  143.98   17.25 
   2  -6  -1  138.62   15.20 
  -2   6   0   41.24    4.49 
   2   6   0   41.54    4.58 
   2  -6   0   38.82    4.81 
  -2  -6   0   35.74    4.45 
   2  -6   0   35.05    4.08 
  -2   6   0   34.94    3.93 
   2   6   0   37.27    4.10 
  -2  -6   0   37.19    4.34 
   2  -6   0   39.54    4.56 
  -2   6   0   39.48    4.26 
   2   6   0   40.72    4.52 
   2  -6   0   41.32    4.56 
  -2  -6   0   38.84    4.54 
  -2   6   0   31.11    3.66 
   2   6   0   37.13    3.94 
   2   6   0   41.60    4.43 
   2  -6   0   37.71    4.43 
  -2  -6   0   34.41    3.81 
  -2  -6   0   38.27    4.11 
   2  -6   0   35.42    3.95 
  -2  -6   0   38.98    4.48 
  -2   6   0   33.34    3.61 
   2   6   0   38.76    4.14 
  -2   6   0   40.41    4.36 
  -2  -6   0   35.27    4.07 
  -2   6   0   32.44    3.47 
   2   6   0   38.85    4.21 
   2  -6   0   34.43    3.91 
  -2   6  -1   62.93    5.41 
   2   6   1   57.72    4.86 
   2  -6   1   49.38    5.46 
  -2  -6  -1   47.54    4.26 
   2  -6   1   45.43    4.35 
  -2  -6  -1   47.70    4.23 
  -2   6  -1   50.45    4.35 
   2   6   1   56.14    4.85 
  -2  -6  -1   51.50    4.51 
   2  -6   1   47.78    4.26 
  -2   6  -1   58.43    4.96 
   2   6   1   59.36    5.01 
   2  -6   1   58.60    5.53 
  -2  -6  -1   54.98    4.83 
  -2   6  -1   58.04    4.79 
   2   6   1   59.35    4.87 
   2  -6   1   57.92    5.16 
  -2  -6  -1   52.14    4.50 
   2  -6   1   48.51    4.22 
  -2  -6  -1   45.89    4.38 
  -2  -6  -1   45.01    3.88 
   2   6   1   46.01    3.78 
  -2   6  -1   58.36    4.82 
  -2  -6  -1   59.10    5.07 
   2   6   1   59.24    4.92 
   2  -6   1   52.07    4.51 
  -2  -6  -2  293.71   24.04 
  -2   6  -2  334.38   27.03 
   2   6   2  315.16   25.59 
   2  -6   2  297.49   24.92 
   2  -6   2  298.56   24.29 
  -2  -6  -2  280.72   23.10 
  -2   6  -2  298.58   23.94 
   2   6   2  308.12   24.56 
  -2  -6  -2  290.78   23.63 
  -2   6  -2  337.25   27.67 
   2   6   2  338.79   27.75 
   2  -6   2  342.26   29.60 
  -2  -6  -2  329.54   27.30 
  -2   6  -2  358.93   28.56 
   2   6   2  361.76   28.84 
   2  -6   2  353.88   29.85 
  -2  -6  -2  310.70   26.08 
   2  -6   2  341.20   28.26 
  -2  -6  -2  286.60   26.59 
  -2  -6  -2  309.31   25.20 
  -2   6  -2  309.98   25.27 
   2   6   2  321.45   26.05 
  -2   6  -2  363.21   29.33 
  -2   6  -2  247.89   19.80 
  -2  -6  -2  341.56   28.00 
   2   6   2  315.35   28.64 
   2  -6   2  320.61   27.14 
  -2  -6  -2  291.06   23.43 
  -2   6  -3   95.51    9.87 
   2   6   3   90.13    9.39 
   2  -6   3   94.62   10.02 
  -2  -6  -3   94.23    9.79 
  -2   6  -3   95.52    9.90 
   2   6   3  104.62   10.81 
   2  -6   3  100.39   10.84 
  -2  -6  -3   92.90    9.93 
   2  -6   3   95.60   10.12 
  -2  -6  -3  103.89   10.98 
  -2  -6  -3   89.77    9.55 
   2   6   3   91.44    9.44 
  -2   6  -3   96.19    9.93 
  -2  -6  -3   80.93    8.41 
  -2   6  -3   97.81   10.07 
   2  -6   3   84.68    8.93 
  -2  -6  -3   95.41    9.99 
   2   6   3   98.92   10.25 
   2  -6   3   88.66    9.44 
  -2  -6  -3   83.81    8.83 
  -2   6  -4   85.50    6.85 
  -2   6  -4   78.45    6.25 
   2   6   4   88.40    7.14 
   2  -6   4   91.03    7.78 
  -2  -6  -4   83.46    6.95 
   2  -6   4   86.26    7.37 
  -2  -6  -4   89.29    7.35 
  -2  -6  -4   82.49    7.12 
  -2   6  -4   88.84    7.20 
  -2   6  -4   83.79    6.70 
  -2  -6  -4   73.92    5.99 
  -2   6  -4   69.37    6.34 
   2  -6   4   83.13    6.78 
  -2  -6  -4   89.78    7.26 
   2   6   4   90.63    7.22 
   2  -6   4   69.51    5.99 
  -2  -6  -4   84.49    6.96 
  -2   6  -5   28.23    2.50 
   2  -6   5   26.78    2.61 
  -2   6  -5   29.46    2.57 
   2   6   5   28.68    2.61 
   2  -6   5   29.79    2.88 
  -2  -6  -5   28.27    2.62 
   2  -6   5   23.05    2.68 
  -2  -6  -5   28.10    2.69 
  -2  -6  -5   26.76    2.52 
  -2   6  -5   27.97    2.46 
  -2   6  -5   30.04    2.67 
  -2  -6  -5   24.06    2.34 
  -2   6  -5   29.35    2.58 
   2  -6   5   28.55    2.86 
  -2  -6  -5   25.00    2.42 
   2   6   5   27.87    2.47 
  -2  -6  -5   25.31    2.54 
   2   6   6   54.33    4.06 
   2  -6   6   48.78    4.10 
  -2  -6  -6   50.89    3.91 
   2  -6   6   52.64    4.24 
  -2  -6  -6   48.33    3.66 
  -2  -6  -6   50.38    3.96 
  -2   6  -6   51.87    3.86 
  -2   6  -6   37.18    6.11 
  -2   6  -6   41.45    3.13 
   2  -6   6   47.30    3.66 
  -2  -6  -6   52.09    3.90 
   2   6   6   51.11    3.77 
  -2  -6  -6   44.64    3.43 
   2   6   7    5.57    1.05 
   2  -6   7    5.41    1.32 
  -2  -6  -7    5.18    1.13 
   2  -6   7    4.18    1.63 
  -2  -6  -7    5.28    1.24 
   2   6   7    4.35    1.18 
  -2   6  -7    5.94    1.10 
  -2   6  -7    5.50    1.11 
  -2  -6  -7    4.60    1.19 
  -2   6  -7    6.14    1.05 
   2   7  -8  111.32   14.11 
   2  -7  -8  101.61   13.10 
   2  -7  -8   93.81   11.99 
   2   7  -8   84.19   12.36 
   2  -7  -8   96.44   12.30 
  -2  -7   8   57.34    8.31 
  -2   7   8   89.26   11.69 
   2  -7  -8   96.59   12.31 
   2   7  -7   13.75    2.45 
   2  -7  -7   14.07    2.53 
   2  -7  -7   14.36    2.49 
  -2  -7   7   16.09    2.87 
   2  -7  -7   15.06    2.62 
  -2   7   7   10.06    1.84 
   2   7  -7   10.42    2.38 
   2  -7  -7   14.93    2.71 
  -2  -7   7    3.45    2.46 
  -2   7   7    9.44    2.01 
   2  -7  -7   15.63    2.76 
   2   7  -6   39.70    3.48 
   2   7  -6   44.44    3.94 
   2  -7  -6   43.64    4.00 
   2  -7  -6   42.13    3.65 
  -2  -7   6   42.71    3.76 
  -2  -7   6   27.64    2.98 
  -2   7   6   39.10    2.94 
   2   7  -6   40.42    3.40 
   2  -7  -6   37.43    3.36 
  -2  -7   6   20.66    5.33 
  -2   7   6   36.30    3.12 
   2  -7  -6   39.46    3.52 
   2   7  -5  190.48   16.37 
  -2  -7   5  184.76   16.10 
   2   7  -5  214.73   18.28 
   2  -7  -5  178.12   16.51 
   2  -7  -5  184.42   15.96 
  -2  -7   5  175.89   15.32 
  -2  -7   5  184.94   16.35 
   2  -7  -5  186.09   15.90 
   2  -7  -5  141.46   12.61 
  -2   7   5  144.57   17.72 
   2   7  -5  138.28   17.42 
   2   7  -5  225.25   19.21 
   2  -7  -5  170.01   15.07 
  -2  -7   5  183.52   16.51 
  -2   7   5  170.80   14.64 
   2  -7  -5  166.92   14.88 
   2   7  -4  281.15   22.75 
  -2  -7   4  263.09   21.99 
  -2   7   4  142.18   24.20 
   2   7  -4  255.35   20.17 
   2  -7  -4  245.21   20.37 
   2  -7  -4  275.65   22.52 
  -2  -7   4  248.43   20.04 
  -2  -7   4  265.54   22.58 
   2  -7  -4  254.51   20.37 
   2  -7  -4  224.84   18.53 
  -2   7   4  243.88   19.87 
   2   7  -4  262.70   21.57 
   2   7  -4  159.06   25.38 
   2  -7  -4  244.97   19.81 
  -2  -7   4  257.58   21.41 
  -2   7   4  178.96   21.76 
   2  -7  -4  247.35   20.79 
  -2   7   3   29.15    2.43 
   2   7  -3   29.77    2.54 
   2  -7  -3   31.08    2.63 
  -2  -7   3   29.83    2.68 
  -2   7   3   28.29    2.34 
   2   7  -3   19.25    2.07 
   2  -7  -3   27.62    2.47 
   2  -7  -3   29.68    2.62 
  -2  -7   3   30.12    2.58 
  -2  -7   3   30.63    3.05 
   2  -7  -3   30.77    2.74 
  -2   7   3   31.38    2.63 
   2   7  -3   28.01    2.31 
   2  -7  -3   27.87    2.53 
  -2  -7   3   33.49    3.12 
  -2   7   3   29.13    2.52 
   2   7  -3   25.77    2.51 
   2  -7  -3   30.50    2.76 
  -2   7   2   71.43    4.94 
   2   7  -2   69.83    5.03 
   2  -7  -2   71.97    5.15 
  -2  -7   2   69.14    5.38 
  -2   7   2   59.24    4.53 
   2   7  -2   55.70    6.40 
   2  -7  -2   67.38    4.85 
  -2  -7   2   50.64    3.69 
  -2  -7   2   53.14    4.08 
   2  -7  -2   63.88    4.48 
  -2   7   2   65.18    4.47 
   2   7  -2   67.67    4.68 
   2  -7  -2   56.99    4.03 
  -2   7   2   46.70    4.44 
   2   7  -2   56.04    7.10 
   2  -7  -2   63.59    4.69 
  -2   7   1   30.10    2.20 
   2   7  -1   30.75    2.32 
   2  -7  -1   30.58    2.51 
  -2  -7   1   26.67    2.52 
  -2   7   1   19.15    1.95 
   2   7  -1   31.17    2.17 
   2  -7  -1   28.85    2.39 
  -2  -7   1   25.77    1.95 
   2  -7  -1   26.82    2.27 
  -2  -7   1   30.88    2.75 
  -2   7   1   26.57    2.03 
   2   7  -1   32.42    2.31 
  -2   7   1   22.19    2.14 
  -2  -7   1   25.91    2.35 
  -2   7   1   31.21    2.26 
   2   7  -1   28.18    2.30 
   2  -7  -1   29.33    2.53 
  -2   7   0  453.71   30.89 
   2   7   0  522.43   36.08 
   2  -7   0  490.13   34.92 
  -2  -7   0  456.75   32.88 
  -2   7   0  464.86   31.14 
   2   7   0  402.98   34.85 
   2  -7   0  470.04   32.94 
  -2  -7   0  413.91   29.02 
   2  -7   0  431.40   29.69 
  -2  -7   0  354.19   27.05 
  -2   7   0  328.93   46.56 
   2   7   0  491.57   33.08 
  -2   7   0  433.42   30.62 
  -2  -7   0  454.63   31.59 
   2   7   0  453.47   33.66 
   2  -7   0  421.88   30.26 
  -2   7  -1  213.93   17.45 
   2   7   1  222.57   18.12 
   2  -7   1  219.96   18.64 
  -2  -7  -1  211.08   17.53 
  -2   7  -1  201.71   15.97 
   2   7   1  227.52   18.02 
   2  -7   1  213.38   17.48 
  -2  -7  -1  194.32   15.98 
   2  -7   1  195.75   15.98 
  -2  -7  -1  207.14   16.93 
  -2   7  -1  199.15   15.82 
   2   7   1  207.73   16.64 
  -2   7  -1  210.58   16.87 
  -2  -7  -1  200.17   16.09 
   2   7   1  199.52   16.58 
   2  -7   1  178.44   14.60 
  -2   7  -2  276.40   22.26 
   2   7   2  287.32   22.98 
   2  -7   2  212.12   21.80 
  -2  -7  -2  286.32   22.91 
  -2   7  -2  275.10   22.34 
   2   7   2  315.01   24.90 
   2  -7   2  297.69   24.73 
  -2  -7  -2  259.80   21.03 
   2  -7   2  246.65   21.96 
  -2  -7  -2  276.81   22.74 
  -2   7  -2  278.73   22.34 
   2   7   2  306.71   24.23 
  -2   7  -2  120.31   42.18 
  -2  -7  -2  278.22   22.46 
   2   7   2  290.50   24.12 
   2  -7   2  245.69   20.10 
  -2   7  -3   79.18    6.95 
   2   7   3   74.36    6.39 
   2  -7   3   81.61    7.59 
  -2  -7  -3   78.94    6.80 
  -2   7  -3   76.12    6.60 
   2   7   3   74.42    6.67 
   2  -7   3   82.02    7.26 
  -2  -7  -3   80.28    7.00 
   2  -7   3   75.92    6.68 
  -2  -7  -3   77.80    6.86 
   2   7   3   69.78    6.00 
  -2   7  -3   68.84    7.14 
  -2  -7  -3   72.73    6.30 
   2   7   3   83.47    7.14 
   2  -7   3   62.10    5.51 
  -2   7  -4   69.30    5.13 
  -2   7  -4   67.79    5.11 
   2   7   4   54.22    4.12 
   2  -7   4   72.35    5.52 
   2  -7   4   65.82    5.22 
  -2  -7  -4   68.14    5.16 
  -2   7  -4   71.06    5.26 
  -2   7  -4   69.92    5.16 
  -2  -7  -4   56.32    4.74 
   2   7   4   76.94    5.64 
  -2  -7  -4   57.68    4.31 
  -2   7  -5    4.41    1.20 
   2  -7   5    5.51    1.41 
  -2   7  -5    3.16    1.19 
   2   7   5    4.45    1.21 
   2  -7   5    4.03    1.54 
  -2  -7  -5    3.37    1.42 
   2  -7   5    4.33    1.65 
  -2  -7  -5    5.03    1.47 
   2   7   5    3.06    1.23 
  -2   7  -5    2.35    1.35 
  -2   7  -5    3.36    1.19 
  -2  -7  -5    4.62    1.24 
   2   7   5    4.78    1.25 
   2   7   6   68.38    8.74 
   2  -7   6   57.81    7.54 
  -2  -7  -6   64.44    8.20 
   2  -7   6   62.89    8.09 
  -2  -7  -6   65.31    8.34 
   2   7   6   55.03    7.06 
  -2   7  -6   44.05    8.29 
   2   8  -6    1.93    0.96 
   2  -8  -6    1.09    1.09 
  -2  -8   6    1.44    1.42 
  -2   8   6    1.19    1.11 
   2  -8  -6    1.57    1.29 
   2   8  -5   75.55    9.95 
  -2  -8   5   77.73   10.30 
   2   8  -5   89.10   11.79 
  -2   8   5   65.73    8.69 
   2  -8  -5   77.76   10.36 
  -2  -8   5   84.44   11.21 
  -2   8   5   71.02    9.63 
   2   8  -5   71.77    9.48 
  -2  -8   5   34.51    7.96 
  -2   8   5   73.01    9.65 
   2  -8  -5   66.83    8.96 
   2   8  -4   26.84    4.47 
  -2  -8   4   27.06    4.58 
   2   8  -4   29.36    4.86 
   2  -8  -4   26.78    4.60 
  -2  -8   4   26.74    4.54 
  -2   8   4   28.25    4.68 
   2   8  -4   11.27    2.49 
  -2  -8   4   23.21    4.09 
  -2   8   4   27.45    4.58 
   2  -8  -4   25.43    4.29 
  -2   8   3   43.40    3.22 
   2   8  -3   49.65    3.77 
   2  -8  -3   44.49    3.36 
  -2  -8   3   48.59    3.79 
  -2   8   3   30.90    3.51 
   2  -8  -3   48.70    3.75 
  -2  -8   3   47.52    3.81 
   2  -8  -3   43.61    3.29 
  -2   8   3   49.91    3.77 
   2   8  -3   32.33    4.90 
  -2   8   3   33.80    3.87 
  -2   8   2   25.11    2.19 
   2   8  -2   25.82    2.25 
   2  -8  -2   24.99    2.34 
  -2  -8   2   25.57    2.38 
  -2   8   2   20.99    1.98 
   2   8  -2   21.20    1.93 
   2  -8  -2   22.74    2.32 
  -2  -8   2   21.02    2.27 
   2  -8  -2   21.44    1.94 
  -2   8   2   22.31    1.95 
   2   8  -2   25.04    2.20 
  -2  -8   2   23.14    2.18 
  -2   8   2   22.82    1.98 
   2   8  -2   23.59    2.02 
   2  -8  -2   20.52    2.12 
  -2   8   1   17.00    1.54 
   2   8  -1   16.21    1.49 
   2  -8  -1   18.99    1.88 
  -2  -8   1   16.66    1.67 
  -2   8   1   15.06    1.37 
   2   8  -1   14.09    1.23 
   2  -8  -1   15.61    1.89 
  -2  -8   1   12.43    1.30 
  -2  -8   1    8.50    1.67 
   2  -8  -1   14.60    1.59 
  -2   8   1   14.88    1.45 
   2   8  -1   14.46    1.33 
  -2  -8   1    8.74    1.48 
   2   8  -1   14.68    1.33 
   2  -8  -1   12.78    1.45 
  -2   8   0   18.71    1.66 
   2   8   0   18.38    1.65 
   2  -8   0   18.43    1.95 
  -2  -8   0   18.19    2.03 
  -2   8   0   19.24    1.76 
   2  -8   0   16.70    1.96 
  -2  -8   0   14.89    1.48 
   2  -8   0   16.47    1.85 
  -2  -8   0   18.32    2.03 
  -2   8   0   15.96    1.61 
   2   8   0   18.30    1.62 
  -2  -8   0   17.91    1.73 
   2   8   0   19.42    1.74 
   2  -8   0   12.30    1.41 
  -2   8  -1   21.00    1.66 
   2   8   1   20.05    1.68 
   2  -8   1   19.00    1.75 
  -2  -8  -1   18.94    1.75 
  -2   8  -1   20.56    1.68 
   2  -8   1   19.59    1.90 
  -2  -8  -1   17.00    1.45 
   2  -8   1   18.51    1.70 
  -2  -8  -1   12.27    1.43 
  -2   8  -1   19.28    1.53 
   2   8   1   19.18    1.51 
  -2   8  -1   16.19    1.49 
  -2  -8  -1   17.16    1.58 
   2   8   1   20.06    1.66 
   2  -8   1   14.41    1.47 
  -2   8  -2  115.28   15.23 
   2   8   2  100.07   13.18 
   2  -8   2  117.07   15.66 
  -2  -8  -2  107.96   14.25 
  -2   8  -2   98.63   14.82 
   2   8   2  116.52   15.32 
   2  -8   2  109.53   14.58 
  -2  -8  -2   99.28   13.11 
   2  -8   2  106.53   14.10 
  -2  -8  -2  107.62   14.23 
   2   8   2  106.67   14.03 
  -2   8  -2   55.29   12.05 
  -2  -8  -2  101.72   13.39 
   2   8   2  132.21   17.35 
  -2   8  -3    9.48    1.74 
   2  -8   3    9.84    1.92 
  -2   8  -3   10.57    1.81 
   2   8   3    9.89    1.71 
   2  -8   3    8.21    1.62 
  -2  -8  -3    8.31    1.58 
   2  -8   3    8.84    1.71 
  -2  -8  -3    9.05    1.75 
  -2   8  -3    7.99    1.50 
  -2  -8  -3    8.47    1.54 
   2   8   3    9.52    1.67 
  -2   8  -4   48.91    6.23 
   2   8   4   47.96    6.13 
   2  -8   4   44.91    5.82 
  -2  -8  -4   43.80    5.64 
  -2   8  -4   52.05    6.62 
   2   8   4   54.05    6.90 
   2   9  -2   30.64    3.97 
  -2  -9   2   29.98    3.97 
   2  -9  -2   31.69    4.15 
   2   9  -2   19.43    3.23 
   2   9  -1   25.56    3.60 
  -2  -9   1   26.69    3.82 
   2  -9  -1   22.68    3.27 
  -2  -9   1   26.92    3.88 
   2   9  -1   25.05    3.54 
   2  -9   0    0.89    1.19 
  -2  -9   0    1.98    1.18 
   3   0 -10   33.11    2.33 
   3   0 -10   28.24    2.00 
   3   0 -10   28.46    2.09 
   3   0 -10   26.95    1.94 
   3   0  -9  986.32   80.01 
   3   0  -9 1136.02   90.72 
   3   0  -9 1111.15   91.16 
   3   0  -9 1128.00   91.82 
   3   0  -9 1086.80   89.71 
   3   0  -9 1124.40   90.56 
   3   0  -9 1142.49   90.73 
   3   0  -8  640.46   54.37 
  -3   0   8  674.85   58.82 
   3   0  -8  608.96   52.24 
  -3   0   8  622.15   55.80 
  -3   0   8  736.18   63.61 
   3   0  -8  621.56   54.58 
   3   0  -8  627.33   53.53 
   3   0  -8  656.96   56.37 
   3   0  -8  670.59   58.50 
   3   0  -8  626.57   54.15 
   3   0  -8  689.54   58.60 
   3   0  -8  690.44   58.60 
   3   0  -8  570.55   50.26 
   3   0  -7  300.29   27.12 
  -3   0   7  320.02   30.23 
   3   0  -7  303.04   27.69 
   3   0  -7  309.06   28.39 
  -3   0   7  337.10   30.69 
   3   0  -7  310.21   29.55 
   3   0  -7  276.19   26.34 
   3   0  -7  288.84   26.31 
   3   0  -7  325.69   29.25 
   3   0  -7  274.94   25.41 
   3   0  -7  331.01   29.90 
   3   0  -7  345.12   32.11 
   3   0  -7  339.37   30.89 
   3   0  -7  340.76   30.72 
   3   0  -7  332.47   30.31 
   3   0  -6  336.07   24.21 
  -3   0   6  296.26   22.91 
   3   0  -6  326.64   23.60 
   3   0  -6  340.24   25.46 
  -3   0   6  293.66   23.05 
   3   0  -6  291.45   21.82 
   3   0  -6  316.13   25.46 
   3   0  -6  295.97   24.93 
   3   0  -6  278.90   21.67 
   3   0  -6  302.28   21.45 
   3   0  -6  272.39   19.97 
   3   0  -6  296.25   21.19 
   3   0  -6  322.56   24.23 
   3   0  -5 5356.45  383.62 
  -3   0   5 5555.36  411.71 
   3   0  -5 6121.97  434.64 
  -3   0   5 6124.10  463.11 
   3   0  -5 5651.95  430.40 
   3   0  -5 5614.15  460.65 
   3   0  -5 5961.85  457.83 
   3   0  -5 5044.42  351.42 
   3   0  -5 5256.20  387.16 
   3   0  -5 5328.31  373.12 
   3   0  -5 6353.72  459.43 
   3   0  -5 5338.50  373.93 
   3   0  -5 5507.95  396.56 
  -3   0   4  436.71   40.38 
   3   0  -4  476.88   43.74 
   3   0  -4  461.84   42.48 
   3   0  -4  414.05   43.61 
  -3   0   4  504.32   48.09 
   3   0  -4  508.76   47.06 
  -3   0   4  484.25   46.57 
  -3   0   4  485.64   45.82 
   3   0  -4  493.68   47.19 
   3   0  -4  493.83   49.14 
   3   0  -4  509.94   48.55 
  -3   0   3 1072.18   98.45 
   3   0  -3 1094.95  100.81 
   3   0  -3 1124.14  103.65 
  -3   0   3 1045.75   98.03 
   3   0  -3 1126.00  103.71 
  -3   0   3 1135.00  107.67 
  -3   0   3  888.90   83.83 
   3   0  -3 1053.56  105.69 
   3   0  -3 1167.69  114.76 
   3   0  -3 1194.71  110.93 
  -3   0   2  439.30   40.97 
   3   0  -2  476.09   44.29 
   3   0  -2  449.31   40.90 
   3   0  -2  409.52   37.82 
  -3   0   2  422.24   40.52 
   3   0  -2  397.63   37.94 
  -3   0   2  406.46   37.65 
  -3   0   2  386.52   37.09 
   3   0  -2  479.35   44.61 
   3   0  -2  456.40   42.37 
   3   0  -2  442.16   40.48 
  -3   0   1  659.10   61.57 
   3   0  -1  689.53   64.57 
   3   0  -1  713.78   65.15 
   3   0  -1  579.56   54.69 
  -3   0   1  674.44   64.41 
   3   0  -1  687.94   63.07 
  -3   0   1  680.86   62.29 
  -3   0   1  657.87   62.22 
   3   0  -1  726.40   66.34 
   3   0  -1  743.15   67.94 
   3   0  -1  707.25   64.71 
  -3   0   0  225.41   20.62 
   3   0   0  243.04   22.24 
   3   0   0  196.69   17.99 
  -3   0   0  214.36   19.58 
  -3   0   0  209.19   19.46 
   3   0   0  219.47   20.11 
  -3   0   0  212.58   19.48 
  -3   0   0  238.80   21.97 
   3   0   0  233.05   21.40 
   3   0   0  240.93   22.15 
   3   0   0  222.11   20.37 
  -3   0  -1   58.79    5.48 
   3   0   1   59.03    5.49 
   3   0   1   65.60    6.08 
  -3   0  -1   51.69    4.77 
  -3   0  -1   55.30    5.46 
   3   0   1   53.83    5.00 
  -3   0  -1   58.38    5.60 
  -3   0  -1   59.76    5.72 
   3   0   1   56.67    5.52 
   3   0   1   57.87    5.57 
   3   0   1   61.65    6.01 
  -3   0  -2 2033.12  140.52 
   3   0   2 2174.56  150.33 
   3   0   2 2426.23  167.87 
  -3   0  -2 2120.54  147.08 
   3   0   2 1913.57  133.52 
  -3   0  -2 2010.41  139.70 
  -3   0  -2 2118.63  148.29 
   3   0   2 2207.22  153.15 
   3   0   2 2256.35  156.03 
   3   0   2 2084.89  145.01 
  -3   0  -2 1798.74  124.30 
   3   0   2 2131.75  147.32 
  -3   0  -2 2017.13  139.67 
  -3   0  -2 2104.60  145.63 
   3   0   2 2043.87  142.99 
  -3   0  -2 1994.61  138.27 
  -3   0  -2 2131.41  147.59 
  -3   0  -2 2167.12  150.41 
  -3   0  -3  828.16   58.57 
   3   0   3  869.01   61.40 
   3   0   3  956.45   67.55 
  -3   0  -3  787.41   55.71 
  -3   0  -3  944.62   69.12 
  -3   0  -3  885.99   62.59 
   3   0   3  912.68   64.46 
   3   0   3  866.00   61.18 
   3   0   3  858.62   60.70 
   3   0   3  806.55   56.94 
  -3   0  -3  834.03   58.88 
  -3   0  -3  854.88   60.33 
  -3   0  -3  827.54   58.42 
   3   0   3  888.29   62.90 
  -3   0  -3  887.99   63.16 
  -3   0  -3  858.65   60.65 
  -3   0  -3  897.45   63.34 
  -3   0  -3  792.13   56.31 
  -3   0  -4  691.75   61.86 
   3   0   4  738.32   66.08 
   3   0   4  821.07   73.42 
  -3   0  -4  742.89   66.45 
  -3   0  -4  807.48   72.22 
  -3   0  -4  750.94   67.17 
   3   0   4  784.66   70.19 
   3   0   4  812.96   72.71 
   3   0   4  694.69   62.13 
  -3   0  -4  699.52   62.52 
   3   0   4  675.67   60.41 
  -3   0  -4  752.99   67.35 
  -3   0  -4  768.43   68.69 
  -3   0  -4  764.96   68.42 
   3   0   4  698.31   62.44 
  -3   0  -4  745.67   66.65 
  -3   0  -4  732.90   65.61 
  -3   0  -4  741.55   66.30 
  -3   0  -4  701.63   62.72 
  -3   0  -4  779.08   69.65 
  -3   0  -4  752.73   67.32 
   3   0   5  185.30   15.76 
  -3   0  -5  194.43   16.52 
  -3   0  -5  174.70   15.08 
  -3   0  -5  171.24   14.54 
   3   0   5  173.26   14.70 
   3   0   5  165.54   14.06 
   3   0   5  160.30   13.61 
  -3   0  -5  173.17   14.66 
  -3   0  -5  181.36   15.34 
  -3   0  -5  174.91   14.80 
   3   0   5  147.24   12.44 
  -3   0  -5  173.82   14.70 
  -3   0  -5  178.37   15.11 
  -3   0  -5  168.33   14.23 
  -3   0  -5  179.22   15.19 
  -3   0  -5  174.31   14.74 
  -3   0  -5  173.24   14.68 
   3   0   6   26.87    2.59 
  -3   0  -6   22.71    2.35 
  -3   0  -6   22.92    2.17 
   3   0   6   23.08    2.30 
   3   0   6   25.53    2.48 
   3   0   6   22.48    2.22 
  -3   0  -6   24.86    2.25 
  -3   0  -6   24.25    2.21 
  -3   0  -6   27.98    2.52 
   3   0   6   20.87    1.78 
  -3   0  -6   26.06    2.24 
   3   0   6   23.54    2.09 
  -3   0  -6   16.84    3.22 
  -3   0  -6   26.77    2.36 
  -3   0  -6   25.68    2.45 
  -3   0  -7  113.89    7.67 
  -3   0  -7  114.48    7.72 
  -3   0  -7  116.76    7.88 
  -3   0  -7  107.25    7.19 
   3   0   7  127.83    8.65 
  -3   0  -7  114.94    7.73 
  -3   0  -7  121.93    8.23 
  -3   0  -7  113.68    7.69 
  -3   0  -8  357.51   29.52 
  -3   0  -8  337.79   27.88 
  -3   0  -8  360.24   29.73 
   3   0   8  356.70   29.44 
  -3   0  -8  352.65   29.36 
  -3   0  -8  364.60   30.10 
  -3   0  -8  339.65   28.06 
  -3   0  -9   -0.06    1.39 
  -3   0  -9    0.23    1.31 
  -3   0  -9    1.19    1.29 
  -3   0  -9    0.01    1.25 
  -3   0  -9    0.78    1.27 
   3   0   9   -1.56    1.41 
   3   1 -11    9.79    1.06 
   3   1 -11    9.13    1.01 
   3   1 -11   13.86    1.38 
   3   1 -11    5.36    1.04 
   3   1 -10  141.84    9.62 
   3   1 -10  158.37   10.90 
   3   1 -10  156.75   10.72 
   3   1 -10  151.92   10.42 
   3   1 -10  108.79    8.93 
   3   1 -10  143.47   10.57 
  -3  -1   9   31.34    3.26 
   3   1  -9   31.98    3.00 
   3   1  -9   37.42    3.09 
   3   1  -9   34.84    2.94 
   3   1  -9   33.31    2.85 
   3   1  -9   34.35    3.00 
   3   1  -9   31.23    2.65 
   3   1  -9   30.31    2.67 
   3   1  -9   37.81    3.21 
  -3   1   8  621.61   53.91 
   3   1  -8  586.36   54.20 
  -3  -1   8  778.01   68.36 
   3  -1  -8  671.40   58.58 
  -3   1   8  655.24   56.49 
   3   1  -8  711.02   61.56 
  -3  -1   8  658.72   56.86 
   3  -1  -8  654.89   58.02 
   3  -1  -8  673.67   59.13 
   3   1  -8  756.05   64.07 
   3  -1  -8  724.40   61.40 
   3  -1  -8  700.92   62.64 
   3   1  -8  783.88   66.96 
   3  -1  -8  646.76   56.18 
   3   1  -8  684.05   58.27 
   3   1  -8  735.08   62.98 
   3   1  -8  797.41   69.68 
   3  -1  -8  732.21   62.24 
   3  -1  -8  691.36   58.57 
   3   1  -8  728.09   62.83 
   3  -1  -8  695.62   59.08 
   3   1  -8  781.06   67.33 
   3   1  -8  796.71   67.86 
   3  -1  -8  695.56   61.62 
   3  -1  -7  123.61   11.33 
   3   1  -7  135.52   12.49 
  -3  -1   7  136.81   12.87 
  -3   1   7  122.48   11.49 
   3   1  -7  118.00   10.97 
   3  -1  -7  130.49   11.88 
  -3   1   7  129.11   12.22 
   3   1  -7  127.87   11.98 
  -3  -1   7  122.38   11.56 
   3  -1  -7  138.64   13.13 
   3  -1  -7  135.56   13.30 
   3  -1  -7  134.50   12.79 
   3   1  -7  137.87   12.41 
   3  -1  -7  131.62   12.25 
   3  -1  -7  137.45   12.68 
   3   1  -7  135.94   12.34 
   3  -1  -7  129.01   11.82 
   3   1  -7  137.97   12.40 
   3   1  -7  137.45   12.52 
   3  -1  -7  138.15   12.47 
   3   1  -7  151.61   13.89 
   3  -1  -7  146.82   13.47 
   3  -1  -7  131.55   11.80 
   3   1  -7  136.60   12.35 
   3  -1  -7  139.19   12.53 
   3   1  -7  144.17   13.07 
   3   1  -7  143.68   12.92 
   3   1  -7  128.16   11.60 
   3  -1  -7  133.97   12.08 
   3  -1  -6  422.40   31.91 
   3   1  -6  438.30   37.51 
   3  -1  -6  469.90   33.70 
  -3  -1   6  504.88   39.62 
  -3   1   6  439.86   32.85 
   3   1  -6  459.31   33.12 
   3  -1  -6  500.85   35.65 
  -3   1   6  470.46   36.47 
   3   1  -6  469.09   34.64 
  -3   1   6  514.63   36.85 
  -3  -1   6  466.35   35.53 
   3  -1  -6  468.85   37.25 
   3  -1  -6  485.32   38.14 
   3  -1  -6  499.66   38.55 
   3   1  -6  440.84   32.16 
   3  -1  -6  493.92   35.16 
   3  -1  -6  468.38   34.07 
   3   1  -6  475.66   33.92 
   3   1  -6  477.44   34.01 
   3  -1  -6  439.26   31.41 
   3   1  -6  470.84   33.84 
   3   1  -6  467.37   34.76 
   3   1  -6  487.43   34.92 
   3   1  -6  522.34   37.29 
   3  -1  -6  518.57   36.85 
   3  -1  -6  386.40   27.89 
  -3  -1   5  182.30   13.18 
   3   1  -5  197.84   14.18 
   3  -1  -5  200.78   15.33 
   3   1  -5  208.81   15.72 
   3  -1  -5  221.15   15.75 
  -3  -1   5  272.45   20.94 
  -3   1   5  187.93   14.07 
   3   1  -5  215.94   15.20 
   3  -1  -5  222.55   15.99 
  -3   1   5  207.80   15.55 
   3   1  -5  249.40   18.13 
  -3   1   5  226.65   16.64 
  -3  -1   5  205.83   16.42 
   3  -1  -5  229.97   19.20 
   3  -1  -5  181.03   15.46 
   3  -1  -5  231.02   17.63 
   3   1  -5  189.73   14.34 
   3   1  -5  195.28   13.60 
   3  -1  -5  208.80   15.28 
   3  -1  -5  214.70   15.16 
   3   1  -5  178.98   13.48 
  -3  -1   4  214.82   20.51 
  -3   1   4  205.08   19.01 
   3   1  -4  226.64   21.14 
   3  -1  -4  239.86   21.98 
   3  -1  -4  228.07   21.94 
   3   1  -4  245.94   22.70 
   3  -1  -4  226.77   20.99 
  -3  -1   4  237.32   22.78 
  -3   1   4  217.10   20.53 
   3   1  -4  223.56   21.16 
   3  -1  -4  244.21   22.54 
  -3   1   4  225.12   21.65 
   3   1  -4  219.47   20.35 
  -3  -1   4  212.03   20.45 
  -3   1   4  217.30   19.85 
   3  -1  -4  232.57   22.21 
   3  -1  -4  245.48   23.78 
   3   1  -4  218.81   20.36 
   3   1  -4  231.10   22.62 
   3  -1  -4  247.35   23.46 
  -3  -1   3 2728.52  258.22 
  -3   1   3 2580.39  237.96 
   3   1  -3 2778.70  259.78 
   3  -1  -3 2357.49  259.38 
   3  -1  -3 2619.60  269.74 
   3   1  -3 2652.54  244.21 
   3  -1  -3 2362.51  225.66 
  -3  -1   3 2848.29  278.64 
  -3   1   3 2427.16  225.74 
   3   1  -3 2843.49  260.22 
   3  -1  -3 2634.08  255.22 
  -3  -1   3 2744.50  263.13 
  -3   1   3 2659.12  253.20 
  -3  -1   3 2580.74  252.53 
   3  -1  -3 2882.47  277.09 
   3  -1  -3 2874.67  278.61 
   3   1  -3 2625.58  245.94 
   3   1  -3 2782.26  262.61 
   3  -1  -3 2840.13  265.36 
  -3  -1   2 1841.93  175.35 
  -3   1   2 1585.81  152.63 
   3   1  -2 1898.78  178.15 
   3  -1  -2 1655.76  162.53 
   3  -1  -2 1878.80  184.06 
  -3   1   2 1808.32  165.25 
   3   1  -2 1483.60  135.97 
  -3  -1   2 1866.68  175.80 
  -3   1   2 1778.65  170.25 
   3   1  -2 1959.96  179.42 
   3  -1  -2 1656.02  151.31 
  -3  -1   2 1878.66  173.94 
  -3   1   2 1833.18  168.71 
  -3  -1   2 1776.31  168.77 
   3   1  -2 2188.79  198.97 
   3  -1  -2 1965.68  190.10 
   3   1  -2 2023.72  186.45 
   3  -1  -2 1993.57  186.82 
   3   1  -2 2100.24  192.30 
   3  -1  -2 2084.35  192.99 
  -3  -1   1   61.34    6.31 
  -3   1   1   60.66    5.71 
   3   1  -1   61.62    5.67 
   3  -1  -1   65.58    6.10 
   3   1  -1   61.43    6.12 
   3  -1  -1   63.83    6.04 
  -3   1   1   68.39    6.32 
   3   1  -1   57.84    5.62 
  -3  -1   1   64.66    6.32 
  -3   1   1   62.62    5.95 
   3   1  -1   64.01    5.93 
   3  -1  -1   62.48    6.19 
  -3  -1   1   64.33    6.17 
  -3   1   1   66.53    6.25 
  -3  -1   1   67.15    6.42 
  -3   1   1   60.70    5.68 
   3   1  -1   70.80    6.53 
   3  -1  -1   81.42    7.73 
   3   1  -1   65.55    6.06 
   3  -1  -1   69.68    6.57 
   3   1  -1   64.98    6.25 
   3  -1  -1   63.71    5.93 
  -3  -1   0 2271.86  207.05 
  -3   1   0 1979.60  188.31 
   3   1   0 2371.40  216.38 
   3  -1   0 1985.17  182.91 
  -3  -1   0 1912.41  225.27 
  -3   1   0 1829.68  166.26 
   3   1   0 1916.98  176.69 
  -3  -1   0 2232.33  214.77 
  -3   1   0 2306.05  210.48 
   3   1   0 2123.57  193.86 
   3  -1   0 1945.46  185.88 
  -3  -1   0 2017.36  189.05 
  -3   1   0 2361.94  215.51 
  -3  -1   0 2186.62  208.98 
  -3   1   0 2118.59  195.88 
   3   1   0 2395.01  218.73 
   3  -1   0 2141.26  196.52 
   3   1   0 2191.73  199.47 
   3  -1   0 2131.26  198.39 
   3   1   0 2094.42  192.92 
   3  -1   0 2143.59  195.95 
  -3  -1  -1  830.47   75.72 
  -3   1  -1  653.90   59.50 
   3   1   1  864.69   78.87 
   3  -1   1  790.13   71.88 
   3  -1   1  867.90   79.16 
  -3  -1  -1  809.78   77.73 
  -3   1  -1  774.13   70.42 
  -3  -1  -1  808.94   76.93 
  -3   1  -1  797.41   72.77 
   3   1   1  789.91   71.95 
   3  -1   1  734.66   67.98 
  -3  -1  -1  812.02   74.89 
  -3   1  -1  639.35   58.31 
  -3  -1  -1  796.82   74.00 
  -3   1  -1  846.99   77.23 
   3   1   1  876.68   81.00 
   3  -1   1  819.69   75.01 
   3   1   1  924.23   84.14 
   3  -1   1  839.28   76.87 
   3   1   1  637.71   58.01 
   3  -1   1  787.33   72.27 
  -3  -1  -2 2544.79  176.51 
  -3   1  -2 2598.52  179.61 
   3   1   2 2829.98  196.91 
   3  -1   2 2508.93  173.88 
   3  -1   2 2588.58  182.24 
  -3  -1  -2 2762.67  191.21 
  -3   1  -2 2167.85  150.00 
  -3  -1  -2 2509.85  178.57 
  -3   1  -2 2800.84  193.67 
   3   1   2 2453.77  170.51 
  -3  -1  -2 2478.86  174.99 
  -3   1  -2 2529.07  175.19 
  -3  -1  -2 2581.14  181.57 
   3   1   2 3051.17  210.91 
   3  -1   2 2849.62  198.52 
   3   1   2 3049.56  210.74 
   3  -1   2 2615.90  182.27 
   3   1   2 2627.52  183.26 
   3  -1   2 2480.23  172.81 
  -3   1  -2 2224.55  153.78 
   3   1   2 2551.79  177.31 
   3  -1   2 2341.54  161.95 
  -3  -1  -2 2302.06  161.19 
   3   1   2 2395.38  165.66 
  -3  -1  -2 2549.85  176.44 
  -3   1  -2 2303.27  159.94 
  -3   1  -2 2381.38  164.55 
  -3  -1  -2 2573.49  179.89 
   3  -1   2 2613.70  181.42 
  -3  -1  -2 2749.28  191.87 
  -3   1  -2 2547.33  176.88 
  -3  -1  -2 2560.72  178.79 
  -3  -1  -2 2877.25  198.82 
  -3   1  -2 2379.62  165.84 
  -3  -1  -3  729.13   51.55 
  -3   1  -3  777.86   54.97 
   3   1   3  800.12   56.66 
   3   1   3  894.09   63.62 
   3  -1   3  837.60   59.94 
  -3  -1  -3  752.98   53.58 
  -3   1  -3  772.82   54.60 
   3   1   3  715.32   50.50 
  -3  -1  -3  693.58   49.33 
  -3   1  -3  775.83   54.87 
  -3  -1  -3  762.74   54.72 
  -3   1  -3  845.86   59.75 
   3   1   3  874.00   62.02 
   3  -1   3  789.72   56.18 
   3   1   3  852.24   60.23 
   3  -1   3  825.24   58.85 
   3   1   3  838.29   59.26 
   3  -1   3  750.70   53.66 
   3   1   3  776.47   55.04 
   3  -1   3  700.55   49.56 
   3   1   3  702.28   49.57 
  -3  -1  -3  783.83   55.49 
  -3   1  -3  778.47   55.22 
  -3  -1  -3  630.39   45.13 
  -3   1  -3  765.29   54.55 
  -3  -1  -3  804.46   56.96 
  -3   1  -3  738.41   52.23 
   3  -1   3  702.36   49.88 
  -3   1  -3  817.56   57.71 
   3  -1   3  842.52   59.87 
  -3  -1  -3  847.65   60.09 
  -3   1  -3  726.93   51.33 
  -3  -1  -3  859.38   60.90 
  -3   1  -3  739.71   52.22 
  -3  -1  -3  804.84   57.76 
  -3   1  -3  776.69   54.89 
  -3  -1  -3  841.94   59.58 
  -3   1  -3  767.67   54.38 
  -3  -1  -4  960.07   85.86 
  -3   1  -4  959.48   85.87 
   3   1   4 1072.32   95.93 
   3  -1   4  995.41   89.25 
   3   1   4 1076.52   96.41 
   3  -1   4 1104.83   99.40 
  -3  -1  -4 1080.14   96.73 
  -3   1  -4 1045.81   93.52 
  -3   1  -4 1023.10   91.50 
  -3  -1  -4  896.29   80.22 
  -3  -1  -4 1065.09   95.36 
  -3   1  -4 1037.29   92.76 
   3   1   4 1170.20  104.75 
   3  -1   4 1067.67   95.77 
   3   1   4 1172.22  104.90 
   3  -1   4 1010.01   90.84 
   3   1   4 1071.65   95.89 
   3  -1   4 1003.72   90.52 
  -3  -1  -4  918.37   82.08 
  -3   1  -4  933.87   83.48 
   3   1   4 1050.43   93.88 
   3  -1   4  939.70   84.01 
   3   1   4  921.10   82.33 
  -3  -1  -4 1056.36   94.47 
  -3   1  -4 1013.41   90.81 
  -3  -1  -4 1189.81  106.92 
  -3   1  -4 1042.64   93.17 
  -3  -1  -4 1085.14   97.07 
  -3   1  -4 1039.34   93.05 
   3   1   4 1068.07   95.55 
   3  -1   4  950.33   85.40 
  -3   1  -4 1024.30   91.57 
  -3  -1  -4  911.36   82.06 
   3  -1   4 1107.18   99.52 
  -3  -1  -4 1122.73  100.46 
  -3   1  -4 1079.22   96.45 
  -3  -1  -4 1109.33   99.52 
  -3   1  -4 1070.16   95.68 
  -3  -1  -4 1120.70  100.34 
  -3   1  -4 1082.29   96.76 
  -3  -1  -4 1166.09  104.30 
  -3   1  -4 1075.75   96.45 
   3   1   5  193.36   16.45 
   3  -1   5  172.68   14.74 
  -3  -1  -5  171.47   14.56 
  -3   1  -5  164.41   13.96 
  -3   1  -5  176.73   15.02 
  -3  -1  -5  171.77   14.64 
  -3   1  -5  166.57   14.16 
   3   1   5  178.64   15.16 
   3  -1   5  165.95   14.20 
   3   1   5  166.82   14.17 
   3  -1   5  155.03   14.30 
   3   1   5  172.15   14.65 
   3  -1   5  171.14   14.58 
  -3  -1  -5  171.39   14.52 
  -3   1  -5  169.57   14.39 
  -3  -1  -5  174.17   14.74 
  -3   1  -5  179.67   15.19 
  -3  -1  -5  170.24   14.41 
  -3   1  -5  175.70   14.88 
   3   1   5  191.88   16.21 
  -3   1  -5  177.20   15.00 
   3  -1   5  171.02   14.54 
  -3  -1  -5  204.08   17.31 
  -3   1  -5  174.31   14.74 
  -3  -1  -5  178.36   15.09 
  -3  -1  -5  169.41   15.57 
  -3   1  -5  172.45   14.60 
  -3  -1  -5  179.39   15.20 
  -3   1  -5  168.91   14.39 
   3   1   6  234.56   19.06 
   3  -1   6  221.89   18.05 
  -3  -1  -6  232.57   18.88 
  -3   1  -6  217.51   17.65 
  -3   1  -6  217.98   17.69 
  -3  -1  -6  233.54   18.97 
  -3   1  -6  215.53   17.51 
   3   1   6  227.76   18.52 
   3  -1   6  211.93   17.29 
   3   1   6  216.25   17.55 
   3  -1   6  208.11   16.94 
   3   1   6  219.99   17.89 
  -3  -1  -6  231.50   18.82 
  -3   1  -6  225.40   18.29 
  -3  -1  -6  238.41   19.28 
  -3   1  -6  223.56   18.09 
  -3  -1  -6  230.14   18.67 
  -3   1  -6  226.43   18.41 
   3   1   6  229.85   18.59 
  -3   1  -6  223.96   18.11 
   3  -1   6  232.75   18.86 
  -3  -1  -6  236.59   19.19 
  -3   1  -6  230.63   18.65 
  -3  -1  -6  296.47   23.97 
  -3   1  -6  199.43   18.88 
  -3  -1  -6  242.48   19.66 
  -3   1  -6  218.01   17.68 
  -3  -1  -6  249.45   20.31 
  -3   1  -6  219.68   17.87 
  -3  -1  -7   66.92    4.59 
  -3   1  -7   61.18    4.21 
  -3  -1  -7   64.53    4.46 
  -3   1  -7   56.49    3.85 
  -3  -1  -7   66.61    4.54 
  -3   1  -7   65.19    4.46 
   3   1   7   57.89    3.94 
  -3   1  -7   64.88    4.42 
   3  -1   7   65.54    4.50 
  -3  -1  -7   64.72    4.53 
  -3   1  -7   61.82    4.18 
  -3  -1  -7   52.39    4.49 
  -3   1  -7   60.70    6.67 
  -3  -1  -7   66.28    4.52 
  -3   1  -7   65.49    4.52 
  -3  -1  -7   64.27    4.46 
  -3   1  -7   59.20    4.19 
  -3  -1  -8   25.00    2.27 
  -3   1  -8   27.00    2.47 
  -3  -1  -8   26.05    2.28 
  -3   1  -8   24.27    2.20 
  -3  -1  -8   25.55    2.31 
  -3   1  -8   25.55    2.30 
  -3   1  -8   24.48    2.15 
   3   1   8   26.65    2.44 
   3  -1   8   26.81    2.31 
  -3   1  -8   22.32    2.06 
  -3  -1  -8   27.47    2.37 
  -3  -1  -8   27.49    2.46 
  -3   1  -8   24.64    2.16 
   3  -1   8   31.51    2.82 
  -3  -1  -8   26.25    2.39 
  -3  -1  -9   64.99    8.56 
  -3   1  -9   67.57    8.91 
  -3  -1  -9   66.61    8.76 
  -3   1  -9   65.13    8.57 
  -3  -1  -9   67.60    8.90 
  -3   1  -9   56.01    8.16 
   3   1   9   63.15    8.33 
  -3   1  -9   64.06    8.43 
  -3  -1  -9   66.81    8.80 
  -3   1  -9   66.40    8.74 
  -3  -1  -9   56.82    7.55 
   3   2 -11   70.13    5.17 
   3   2 -11   70.08    5.22 
   3   2 -11   72.78    5.41 
   3   2 -11   69.74    5.27 
   3   2 -11   65.56    5.01 
   3   2 -11   72.12    5.32 
   3   2 -10  204.56   16.47 
   3   2 -10  227.39   18.12 
   3  -2 -10  180.53   14.56 
   3   2 -10  218.87   17.60 
   3   2 -10  222.68   19.00 
   3  -2 -10  197.25   15.65 
   3   2 -10  213.91   17.29 
   3   2 -10  217.59   17.99 
   3   2 -10  217.87   17.61 
  -3  -2   9   15.41    2.43 
   3   2  -9   15.80    2.12 
  -3  -2   9   14.31    2.34 
   3   2  -9   15.07    1.69 
   3  -2  -9   15.30    1.82 
   3   2  -9   15.61    1.90 
   3  -2  -9   16.03    1.87 
   3   2  -9   17.51    2.00 
   3   2  -9   18.30    2.16 
   3  -2  -9   15.81    1.83 
   3   2  -9   18.13    2.11 
   3   2  -9   15.37    1.74 
   3   2  -9   16.68    1.86 
   3  -2  -9   15.71    1.77 
   3  -2  -9   15.87    1.83 
  -3   2   8  347.62   25.42 
   3   2  -8  396.33   28.94 
  -3  -2   8  398.98   29.95 
  -3   2   8  340.42   25.24 
   3   2  -8  386.41   28.35 
  -3  -2   8  403.26   30.47 
   3  -2  -8  399.42   30.07 
   3  -2  -8  365.51   27.55 
   3  -2  -8  374.74   28.56 
   3   2  -8  419.29   30.06 
   3  -2  -8  385.61   27.90 
   3  -2  -8  397.16   29.94 
   3   2  -8  408.37   30.07 
   3   2  -8  402.26   29.19 
   3  -2  -8  355.34   27.90 
   3   2  -8  394.14   28.37 
   3   2  -8  396.62   29.19 
   3   2  -8  285.99   48.32 
   3  -2  -8  370.94   26.63 
   3   2  -8  389.97   28.59 
   3   2  -8  445.42   32.45 
   3   2  -8  389.57   28.32 
   3  -2  -8  373.70   27.54 
   3  -2  -8  382.99   28.71 
   3  -2  -7   57.23    4.54 
  -3   2   7   66.54    4.91 
   3   2  -7   70.68    5.21 
  -3  -2   7   68.27    5.39 
   3  -2  -7   63.83    4.88 
   3   2  -7   71.93    5.44 
  -3  -2   7   63.85    8.74 
   3  -2  -7   61.42    4.85 
   3  -2  -7   64.99    5.30 
   3  -2  -7   64.86    5.27 
   3   2  -7   61.75    4.74 
   3  -2  -7   69.13    5.03 
   3  -2  -7   69.11    5.31 
   3  -2  -7   60.40    4.43 
   3   2  -7   66.39    4.98 
   3   2  -7   67.38    4.93 
   3  -2  -7   69.48    5.58 
   3   2  -7   64.56    4.76 
   3   2  -7   64.74    4.81 
   3   2  -7   65.83    4.96 
   3  -2  -7   66.10    4.88 
   3  -2  -7   66.92    5.00 
   3   2  -7   69.24    5.29 
   3   2  -7   71.89    5.40 
   3   2  -7   68.69    5.02 
   3  -2  -7   68.78    5.26 
   3  -2  -7   65.28    4.90 
   3  -2  -6 1726.04  137.91 
  -3   2   6 1737.40  142.52 
   3   2  -6 1567.29  121.34 
  -3  -2   6 1886.26  152.62 
   3   2  -6 1824.01  143.83 
   3  -2  -6 1998.22  180.78 
  -3   2   6 1706.15  133.38 
   3   2  -6 1897.97  150.15 
  -3  -2   6 1887.51  155.03 
   3  -2  -6 1922.78  180.61 
   3  -2  -6 1870.92  158.02 
   3  -2  -6 2180.10  206.62 
   3   2  -6 1954.75  174.93 
   3  -2  -6 1813.68  147.67 
   3  -2  -6 1965.37  179.36 
   3   2  -6 1992.57  180.44 
   3  -2  -6 1997.59  185.47 
   3   2  -6 2042.12  182.77 
   3   2  -6 1984.56  180.25 
   3   2  -6 2055.43  186.90 
   3  -2  -6 1883.56  146.72 
   3  -2  -6 2196.18  201.80 
   3   2  -6 1767.62  140.15 
   3   2  -6 1582.40  125.65 
   3   2  -6 1927.65  173.19 
   3   2  -6 1823.64  144.80 
   3  -2  -6 2007.79  186.22 
   3  -2  -6 1983.06  181.27 
  -3  -2   5 1033.19   79.96 
   3   2  -5 1082.12   78.75 
   3  -2  -5 1129.20   86.54 
  -3   2   5 1188.15   84.29 
   3   2  -5 1203.90   86.44 
  -3  -2   5 1137.73   87.17 
   3   2  -5 1120.08   80.84 
   3  -2  -5 1179.97   88.55 
  -3   2   5 1078.31   80.52 
   3   2  -5 1260.07   93.32 
  -3  -2   5 1204.32   90.50 
   3  -2  -5 1135.61   93.77 
   3  -2  -5 1131.35   91.23 
   3  -2  -5 1162.96   87.72 
   3   2  -5 1081.09   81.94 
   3  -2  -5 1174.17   91.79 
   3   2  -5 1173.04   83.75 
   3  -2  -5 1129.18   85.74 
   3   2  -5 1127.00   80.38 
   3   2  -5 1068.35   79.26 
   3  -2  -5 1153.43   82.65 
  -3  -2   4  686.48   55.86 
  -3   2   4  693.89   48.30 
   3   2  -4  686.26   49.74 
   3  -2  -4  684.97   47.77 
   3  -2  -4  697.82   56.54 
  -3   2   4  657.86   49.39 
   3   2  -4  731.38   51.60 
  -3  -2   4  737.55   55.03 
   3   2  -4  746.58   52.02 
   3  -2  -4  786.08   54.77 
  -3   2   4  628.57   45.10 
   3   2  -4  714.42   51.20 
  -3  -2   4  706.72   58.16 
   3  -2  -4  710.02   61.73 
   3  -2  -4  690.52   52.72 
   3  -2  -4  835.30   62.98 
   3  -2  -4  723.46   50.28 
   3   2  -4  744.60   52.28 
   3   2  -4  700.32   49.81 
   3   2  -4  758.67   53.81 
   3  -2  -4  746.80   52.21 
   3  -2  -4  688.73   53.77 
   3   2  -4  723.19   50.72 
   3   2  -4  682.33   47.93 
   3   2  -4  675.64   48.18 
  -3  -2   3  796.32   88.01 
  -3   2   3  835.48   76.34 
   3   2  -3  812.94   81.76 
   3  -2  -3  929.54   84.91 
   3  -2  -3  875.45   86.53 
  -3   2   3  976.68   89.01 
   3   2  -3  900.41   82.54 
  -3  -2   3  918.44   87.93 
  -3   2   3  752.02   68.86 
   3   2  -3  843.20   81.91 
   3  -2  -3  985.09   89.88 
  -3   2   3  849.10   79.50 
   3   2  -3  903.93   83.49 
  -3  -2   3  913.85   91.24 
   3  -2  -3  949.35   93.17 
   3  -2  -3  967.29   95.00 
   3   2  -3  938.64   86.39 
   3  -2  -3  977.29   92.75 
   3  -2  -3  776.30   74.00 
   3  -2  -3  880.57   81.59 
  -3  -2   2  589.90   56.11 
  -3   2   2  587.54   53.67 
   3   2  -2  579.45   53.43 
   3  -2  -2  641.93   58.54 
   3  -2  -2  670.81   65.62 
  -3  -2   2  479.45   43.64 
  -3   2   2  584.15   53.31 
   3   2  -2  556.48   52.68 
  -3  -2   2  603.69   56.59 
  -3   2   2  535.73   49.33 
   3   2  -2  537.23   49.15 
   3  -2  -2  642.58   58.76 
  -3  -2   2  586.39   54.98 
  -3   2   2  580.14   53.47 
  -3  -2   2  639.32   61.61 
   3  -2  -2  649.95   62.48 
   3   2  -2  652.96   59.57 
   3  -2  -2  623.79   59.58 
   3   2  -2  665.02   60.61 
   3  -2  -2  630.01   58.88 
  -3  -2   1 1878.15  173.57 
  -3   2   1 1660.09  151.18 
   3   2  -1 1831.97  167.66 
   3  -2  -1 1779.20  162.11 
   3  -2  -1 1724.73  162.67 
  -3  -2   1 1591.32  148.31 
  -3   2   1 1616.03  147.13 
   3   2  -1 1581.17  147.75 
  -3  -2   1 1662.68  157.03 
  -3   2   1 1541.61  145.91 
   3   2  -1 1772.41  161.77 
   3  -2  -1 1462.22  147.00 
  -3  -2   1 1690.46  159.67 
  -3   2   1 1723.41  157.43 
   3  -2  -1 2016.00  183.34 
  -3  -2   1 1664.87  163.31 
   3   2  -1 1731.35  165.51 
   3  -2  -1 1784.99  170.97 
   3   2  -1 1748.39  162.88 
   3  -2  -1 1838.10  172.74 
   3   2  -1 1545.50  164.09 
   3  -2  -1 1791.07  170.64 
  -3  -2   0 2364.55  168.29 
  -3   2   0 2361.84  170.43 
   3   2   0 2334.37  163.49 
   3  -2   0 2386.08  178.16 
   3  -2   0 2626.81  192.45 
  -3  -2   0 2392.57  174.78 
  -3   2   0 2564.36  177.73 
   3   2   0 2324.60  161.72 
  -3  -2   0 2416.90  180.54 
  -3   2   0 2529.76  179.92 
   3   2   0 2697.31  188.08 
   3  -2   0 2495.17  233.77 
  -3  -2   0 2370.77  176.24 
  -3   2   0 2582.28  179.11 
   3  -2   0 2832.01  199.30 
  -3  -2   0 2568.49  197.18 
   3   2   0 2890.26  203.53 
   3  -2   0 2622.32  193.27 
   3   2   0 2858.17  200.22 
   3  -2   0 2657.77  250.43 
   3   2   0 2518.70  190.18 
   3  -2   0 2618.13  199.53 
  -3   2   0 2228.18  154.74 
   3  -2   0 2311.18  161.51 
   3   2   0 2351.73  164.04 
  -3  -2   0 2505.61  230.45 
  -3  -2  -1  270.78   19.43 
  -3   2  -1  265.79   18.49 
   3   2   1  285.04   20.10 
   3  -2   1  272.95   18.99 
   3  -2   1  286.28   21.77 
  -3  -2  -1  255.14   18.84 
  -3   2  -1  247.05   17.33 
  -3  -2  -1  261.68   19.95 
  -3   2  -1  224.82   15.63 
   3   2   1  256.15   17.97 
   3  -2   1  217.38   15.57 
  -3  -2  -1  261.96   18.57 
  -3   2  -1  268.96   18.71 
  -3  -2  -1  273.73   20.36 
  -3   2  -1  260.18   18.31 
   3   2   1  312.94   21.88 
   3  -2   1  258.47   20.70 
   3   2   1  310.58   21.59 
   3  -2   1  275.93   20.74 
   3   2   1  285.49   19.96 
   3  -2   1  255.42   19.10 
   3   2   1  252.67   18.61 
   3  -2   1  244.00   16.95 
  -3  -2  -1  249.29   18.47 
   3   2   1  236.25   16.52 
  -3   2  -1  254.39   17.86 
  -3  -2  -1  292.87   20.38 
  -3   2  -1  262.70   18.21 
  -3   2  -1  258.61   17.92 
   3  -2   1  254.03   18.09 
  -3  -2  -1  223.17   15.50 
  -3  -2  -1  265.31   19.11 
  -3  -2  -1  265.62   19.07 
  -3  -2  -2   24.75    2.08 
  -3   2  -2   23.44    1.92 
   3   2   2   25.50    2.03 
   3  -2   2   22.40    1.85 
   3  -2   2   23.72    2.09 
  -3  -2  -2   21.62    2.03 
  -3   2  -2   22.81    1.73 
  -3  -2  -2   23.93    2.04 
  -3   2  -2   24.13    2.08 
  -3  -2  -2   22.75    1.80 
  -3   2  -2   26.49    2.22 
  -3  -2  -2   23.63    2.21 
  -3   2  -2   25.66    2.09 
   3   2   2   25.61    2.02 
   3  -2   2   23.77    2.06 
   3   2   2   25.35    2.05 
   3  -2   2   25.51    2.23 
   3   2   2   26.30    2.12 
   3  -2   2   22.41    1.92 
   3   2   2   22.88    1.79 
   3  -2   2   21.06    1.56 
   3   2   2   19.54    1.52 
  -3  -2  -2   24.49    1.88 
  -3   2  -2   21.73    1.80 
  -3  -2  -2   23.77    1.85 
  -3   2  -2   24.22    1.80 
  -3  -2  -2   23.99    1.96 
  -3   2  -2   20.84    1.64 
  -3   2  -2   24.40    1.86 
   3  -2   2   32.91    2.44 
  -3  -2  -2   25.21    1.96 
  -3   2  -2   26.30    2.01 
  -3   2  -2   25.81    1.91 
  -3  -2  -2   22.98    1.84 
  -3   2  -2   19.51    1.48 
   3   2   2   20.66    1.51 
  -3  -2  -2   24.06    1.82 
  -3  -2  -3   49.56    4.05 
  -3   2  -3   47.24    3.78 
   3   2   3   52.82    4.26 
   3  -2   3   53.21    4.34 
   3  -2   3   55.09    4.77 
  -3  -2  -3   51.14    4.34 
  -3  -2  -3   54.48    4.44 
  -3   2  -3   61.56    4.91 
   3   2   3   49.65    3.93 
  -3   2  -3   51.00    4.10 
  -3  -2  -3   54.98    4.67 
  -3   2  -3   61.47    4.93 
   3   2   3   56.10    4.52 
   3  -2   3   55.72    4.70 
   3   2   3   63.07    5.03 
   3  -2   3   54.25    4.54 
   3   2   3   60.75    4.87 
   3  -2   3   58.62    4.87 
  -3   2  -3   49.69    3.87 
   3   2   3   49.30    3.92 
   3  -2   3   51.37    4.02 
  -3  -2  -3   48.62    3.93 
   3   2   3   52.96    4.14 
  -3  -2  -3   54.18    4.37 
  -3   2  -3   62.33    4.91 
  -3  -2  -3   50.54    4.24 
  -3   2  -3   53.62    4.18 
  -3  -2  -3   54.86    4.49 
  -3   2  -3   49.73    3.92 
  -3  -2  -3   60.77    4.78 
  -3   2  -3   53.47    4.32 
  -3   2  -3   54.44    4.48 
   3  -2   3   59.07    4.74 
  -3  -2  -3   56.34    4.73 
  -3   2  -3   59.09    4.61 
  -3  -2  -3   59.74    4.76 
  -3   2  -3   58.63    4.60 
  -3  -2  -3   51.70    4.39 
  -3   2  -3   56.34    4.46 
   3  -2   3   65.74    5.45 
  -3  -2  -3   53.15    4.17 
  -3  -2  -4  106.17    7.74 
  -3   2  -4  105.38    7.67 
   3   2   4  116.76    8.49 
   3  -2   4  102.73    7.74 
   3  -2   4  111.89    8.91 
  -3  -2  -4  115.20    8.75 
  -3  -2  -4  108.54    8.17 
  -3   2  -4  109.70    7.98 
   3   2   4  101.08    7.29 
  -3   2  -4  105.50    7.74 
  -3  -2  -4  109.41    8.32 
  -3   2  -4  112.26    8.24 
   3   2   4  120.28    8.77 
   3  -2   4  106.41    8.05 
   3   2   4  118.81    8.59 
   3   2   4  122.71    8.91 
   3  -2   4  106.78    8.08 
  -3   2  -4   99.20    7.12 
   3   2   4  101.92    7.53 
   3  -2   4  101.93    7.38 
  -3  -2  -4  104.07    7.69 
   3   2   4  105.90    7.60 
  -3  -2  -4  107.88    7.92 
  -3   2  -4  110.98    8.14 
  -3  -2  -4  116.30    8.66 
  -3   2  -4  110.64    7.96 
  -3  -2  -4  115.44    8.96 
  -3   2  -4  111.21    8.04 
  -3  -2  -4  120.42    8.71 
  -3   2  -4  121.51    8.73 
  -3   2  -4  116.13    8.33 
   3  -2   4  116.52    8.67 
  -3  -2  -4  112.90    8.20 
  -3   2  -4  113.32    8.18 
  -3  -2  -4  118.44    8.72 
  -3   2  -4  128.26    9.23 
  -3  -2  -4  121.35    9.05 
  -3   2  -4  110.22    7.99 
   3  -2   4  128.69    9.92 
  -3  -2  -4  124.20    8.97 
   3   2   5  141.82   10.63 
   3  -2   5  134.00   10.41 
  -3  -2  -5  154.93   11.37 
  -3   2  -5  149.10   10.77 
  -3   2  -5  137.05    9.91 
  -3  -2  -5  145.81   10.95 
  -3   2  -5  140.90   10.29 
   3   2   5  140.67   10.27 
   3  -2   5  124.81    9.36 
   3   2   5  153.58   11.17 
   3  -2   5  133.65    9.98 
   3   2   5  141.87   10.28 
  -3   2  -5  119.49    8.61 
   3  -2   5  127.94    9.34 
   3   2   5  120.45    8.65 
  -3  -2  -5  141.57   10.31 
  -3   2  -5  134.31    9.92 
  -3  -2  -5  141.45   10.34 
  -3   2  -5  135.27    9.73 
  -3  -2  -5  146.32   10.82 
  -3   2  -5  137.66   10.02 
  -3  -2  -5  130.37    9.45 
  -3   2  -5  141.02   10.16 
  -3   2  -5  139.74   10.05 
   3  -2   5  130.15    9.52 
  -3  -2  -5  123.21    8.94 
  -3   2  -5  124.21    8.95 
  -3  -2  -5  143.95   10.52 
  -3   2  -5  145.53   10.48 
  -3  -2  -5  145.42   10.93 
  -3   2  -5  133.46    9.69 
   3  -2   5  143.73   11.08 
  -3  -2  -5  144.11   10.45 
   3   2   6 1031.62  106.72 
   3  -2   6  946.11   98.28 
  -3   2  -6  988.31  101.37 
  -3   2  -6  982.44  100.76 
   3  -2   6  995.33  102.71 
  -3  -2  -6 1019.67  105.61 
   3   2   6  968.12   99.56 
   3  -2   6  888.34   92.20 
   3   2   6  964.74   99.11 
   3  -2   6  850.42   87.59 
   3   2   6  935.24   95.97 
  -3  -2  -6 1037.42  106.89 
  -3   2  -6 1010.17  105.36 
  -3  -2  -6 1134.66  117.11 
  -3   2  -6 1050.63  107.81 
  -3  -2  -6 1060.82  109.79 
  -3   2  -6 1093.32  113.01 
   3   2   6 1038.70  106.56 
  -3   2  -6 1029.20  105.56 
   3  -2   6  980.02  100.74 
  -3  -2  -6 1015.61  104.26 
  -3   2  -6 1073.73  110.07 
  -3  -2  -6 1039.40  107.22 
  -3   2  -6 1042.70  106.92 
  -3  -2  -6 1085.96  112.09 
  -3   2  -6 1002.91  103.10 
   3  -2   6 1093.98  113.35 
  -3  -2  -6 1005.72  103.38 
  -3  -2  -7  295.92   23.53 
  -3   2  -7  281.81   22.37 
  -3  -2  -7  282.06   22.31 
  -3   2  -7  277.82   21.98 
  -3  -2  -7  269.81   21.54 
  -3   2  -7  278.85   22.27 
   3   2   7  257.47   20.55 
  -3   2  -7  286.58   22.61 
  -3  -2  -7  281.83   22.30 
  -3   2  -7  274.76   21.68 
  -3  -2  -7  293.66   23.22 
  -3   2  -7  286.98   22.69 
  -3  -2  -7  277.62   22.23 
  -3   2  -7  271.33   21.56 
   3  -2   7  290.67   23.22 
  -3  -2  -7  266.69   21.30 
  -3  -2  -8   84.53    6.30 
  -3   2  -8   87.84    6.45 
  -3  -2  -8   92.74    6.77 
  -3   2  -8   83.77    6.13 
  -3  -2  -8   80.64    5.96 
  -3   2  -8   93.75    6.93 
   3   2   8   81.68    5.98 
  -3   2  -8   90.15    6.57 
   3   2   8   90.30    6.76 
  -3   2  -8   83.77    6.11 
  -3   2  -8   90.37    6.62 
  -3  -2  -8   92.02    6.75 
  -3   2  -8   80.53    5.97 
   3  -2   8   74.47    5.87 
  -3  -2  -8   86.95    6.48 
   3  -2   9   80.11   10.44 
  -3  -2  -9   70.23    8.93 
  -3  -2  -9   72.94    9.25 
  -3   2  -9   66.86    8.54 
  -3  -2  -9   72.07    9.17 
  -3   2  -9   67.21    8.55 
  -3   2  -9   35.05    9.11 
  -3  -2  -9   73.86    9.39 
  -3   2  -9   64.41    8.28 
   3  -2   9   64.37    8.22 
  -3  -2  -9   58.94    7.64 
   3   3 -11   94.88   12.50 
   3   3 -11   90.49   11.94 
   3   3 -11   99.59   13.15 
   3   3 -11   87.36   11.54 
   3   3 -11   59.19   12.09 
   3   3 -11   78.49   10.83 
   3   3 -10  360.82   30.64 
   3  -3 -10  280.13   24.54 
   3   3 -10  319.55   27.55 
   3  -3 -10  277.87   24.42 
   3   3 -10  313.47   27.24 
   3   3 -10  359.03   30.89 
   3  -3 -10  294.59   25.11 
   3   3 -10  307.16   26.72 
   3   3 -10  381.04   32.69 
   3   3 -10  281.64   24.14 
   3  -3 -10  283.61   24.30 
   3   3  -9  182.20   12.23 
   3  -3  -9  155.00   11.15 
   3  -3  -9  150.31   10.12 
   3   3  -9  172.57   11.80 
  -3  -3   9  149.75   10.83 
   3  -3  -9  151.94   11.13 
   3   3  -9  147.75   10.31 
   3   3  -9  148.19   10.66 
   3  -3  -9  164.44   11.30 
   3   3  -9  153.57   10.73 
   3   3  -9  171.77   11.92 
   3   3  -9  167.24   11.43 
   3  -3  -9  158.74   10.81 
   3  -3  -9  152.91   10.58 
   3   3  -8  173.13   14.19 
  -3  -3   8  156.74   13.12 
  -3   3   8  148.46   12.20 
   3   3  -8  159.60   13.27 
  -3  -3   8  142.82   12.13 
   3  -3  -8  148.72   12.40 
   3  -3  -8  143.71   12.16 
   3  -3  -8  149.22   12.77 
   3   3  -8  173.20   14.08 
   3  -3  -8  166.11   14.06 
   3  -3  -8  150.90   12.46 
   3   3  -8  163.06   13.37 
  -3  -3   8  147.90   12.85 
   3  -3  -8  168.24   14.55 
   3   3  -8  152.98   12.95 
   3   3  -8  164.62   13.63 
   3   3  -8  181.40   14.95 
   3  -3  -8  167.98   13.87 
   3   3  -8  163.15   13.39 
   3   3  -8  182.07   15.13 
   3   3  -8  160.82   13.47 
   3  -3  -8  168.78   13.74 
   3  -3  -8  159.97   13.31 
   3  -3  -7  233.54   20.07 
  -3   3   7  248.75   21.11 
   3   3  -7  214.19   18.15 
  -3  -3   7  254.27   22.30 
  -3   3   7  246.51   21.20 
   3   3  -7  248.79   21.49 
   3  -3  -7  252.03   22.42 
   3  -3  -7  241.90   21.69 
   3  -3  -7  236.68   21.97 
   3   3  -7  256.45   23.20 
   3  -3  -7  243.05   21.13 
   3  -3  -7  272.20   24.87 
   3  -3  -7  239.03   20.44 
   3   3  -7  263.57   22.66 
  -3  -3   7  261.20   22.82 
   3  -3  -7  268.26   23.34 
   3   3  -7  244.19   21.35 
   3   3  -7  251.66   21.48 
   3   3  -7  280.76   24.13 
   3  -3  -7  265.01   23.14 
   3   3  -7  246.68   21.39 
   3   3  -7  240.45   21.10 
   3   3  -7  278.48   23.76 
   3  -3  -7  274.08   23.36 
   3  -3  -7  252.55   22.18 
   3  -3  -6   81.81    5.60 
  -3   3   6   87.18    5.61 
   3   3  -6   71.38    5.81 
  -3  -3   6   79.33    5.59 
  -3   3   6   75.65    5.13 
   3   3  -6   87.96    5.90 
   3   3  -6   81.31    5.38 
  -3  -3   6   84.31    6.49 
   3  -3  -6   81.14    5.81 
   3  -3  -6   84.42    6.14 
   3  -3  -6   83.81    5.99 
   3   3  -6   91.84    5.78 
   3  -3  -6   84.95    5.50 
   3  -3  -6   83.77    5.83 
   3  -3  -6   81.15    5.45 
   3   3  -6   83.78    5.40 
  -3  -3   6   94.31    6.19 
   3  -3  -6   88.36    6.00 
   3   3  -6   79.50    5.12 
   3   3  -6   91.96    6.01 
   3  -3  -6   83.01    5.52 
   3   3  -6   85.30    5.56 
   3   3  -6   78.62    5.47 
   3   3  -6   95.90    6.28 
   3   3  -6   80.20    5.10 
   3  -3  -6   89.41    5.71 
   3  -3  -6   81.81    5.98 
   3   3  -5   36.51    3.02 
  -3  -3   5   34.48    3.10 
   3  -3  -5   41.35    3.61 
  -3   3   5   40.65    3.47 
   3   3  -5   47.50    3.81 
  -3  -3   5   40.25    3.81 
   3   3  -5   45.73    3.69 
   3  -3  -5   43.79    3.56 
   3   3  -5   39.02    3.29 
  -3  -3   5   50.09    4.46 
   3  -3  -5   45.56    4.12 
   3  -3  -5   53.41    4.51 
   3  -3  -5   42.24    3.74 
   3   3  -5   45.66    3.65 
   3  -3  -5   39.72    3.12 
   3  -3  -5   48.92    4.25 
   3  -3  -5   41.63    3.36 
   3   3  -5   49.91    4.05 
  -3  -3   5   48.75    4.04 
   3  -3  -5   47.72    4.11 
   3   3  -5   49.71    3.91 
   3   3  -5   47.67    3.80 
   3   3  -5   52.20    4.16 
   3  -3  -5   51.04    4.05 
   3  -3  -5   46.48    4.06 
   3   3  -5   48.67    3.89 
   3   3  -5   51.98    4.12 
   3   3  -5   51.58    4.19 
   3   3  -5   52.01    4.05 
   3  -3  -5   50.91    4.08 
   3  -3  -5   48.41    4.24 
  -3   3   4  438.88   31.49 
   3   3  -4  436.79   31.95 
   3  -3  -4  418.76   30.64 
  -3  -3   4  419.27   32.49 
   3  -3  -4  464.64   37.43 
  -3   3   4  471.25   33.43 
   3   3  -4  422.06   30.09 
  -3  -3   4  432.83   33.18 
   3   3  -4  458.58   32.85 
   3  -3  -4  381.28   32.95 
  -3   3   4  390.99   28.36 
   3   3  -4  428.29   32.65 
  -3  -3   4  418.43   33.83 
   3  -3  -4  421.10   33.26 
   3  -3  -4  451.23   34.56 
   3  -3  -4  317.97   26.78 
  -3  -3   4  401.95   29.38 
   3   3  -4  405.20   30.64 
   3  -3  -4  433.30   32.00 
   3  -3  -4  464.78   34.18 
   3   3  -4  478.14   34.41 
  -3  -3   4  430.43   31.01 
   3  -3  -4  440.85   34.36 
   3   3  -4  469.39   33.37 
   3   3  -4  405.36   29.30 
   3   3  -4  453.66   32.65 
   3  -3  -4  462.99   36.81 
   3   3  -4  435.69   31.61 
   3   3  -4  485.93   35.39 
   3   3  -4  466.18   33.07 
   3  -3  -4  483.64   34.77 
   3  -3  -4  453.80   33.85 
  -3   3   3  667.92   46.74 
   3   3  -3  668.21   49.55 
   3  -3  -3  751.42   54.07 
  -3  -3   3  679.07   54.58 
   3  -3  -3  687.04   54.76 
  -3   3   3  620.46   47.09 
   3   3  -3  713.50   50.93 
  -3  -3   3  702.36   52.08 
   3   3  -3  696.06   50.16 
   3  -3  -3  575.88   53.78 
  -3   3   3  663.07   47.33 
   3   3  -3  694.28   49.07 
  -3  -3   3  642.87   53.80 
   3  -3  -3  683.20   53.77 
   3  -3  -3  684.03   53.07 
   3  -3  -3  695.54   53.12 
  -3   3   3  569.65   40.03 
   3  -3  -3  607.76   43.48 
  -3  -3   3  670.51   49.06 
   3   3  -3  648.27   45.20 
   3   3  -3  666.58   46.58 
   3  -3  -3  720.50   51.35 
   3  -3  -3  687.60   52.68 
  -3  -3   3  593.37   43.70 
   3  -3  -3  712.02   53.36 
   3   3  -3  690.42   48.71 
   3   3  -3  693.61   48.47 
   3   3  -3  665.10   46.66 
   3   3  -3  744.52   52.66 
  -3  -3   3  837.10   63.78 
   3  -3  -3  773.83   53.72 
  -3   3   2 1887.20  132.21 
   3   3  -2 1961.00  140.61 
   3  -3  -2 1988.33  142.19 
  -3  -3   2 1954.06  152.30 
   3  -3  -2 1926.72  146.13 
  -3  -3   2 1497.01  113.19 
  -3   3   2 1953.90  135.55 
   3   3  -2 1842.07  129.99 
  -3  -3   2 1840.86  138.79 
   3   3  -2 1989.44  139.20 
   3  -3  -2 1554.31  136.95 
  -3  -3   2 1947.83  140.09 
  -3   3   2 1719.55  123.49 
  -3  -3   2 1782.10  134.47 
   3  -3  -2 1948.01  148.44 
   3  -3  -2 1918.51  146.02 
   3   3  -2 2037.98  141.40 
   3  -3  -2 1961.24  151.70 
  -3   3   2 1677.07  116.89 
   3  -3  -2 1843.37  129.80 
  -3  -3   2 1727.25  127.98 
   3   3  -2 1741.88  120.75 
   3   3  -2 1530.82  111.20 
   3  -3  -2 1569.64  121.98 
   3  -3  -2 1791.87  135.25 
   3  -3  -2 1800.97  134.53 
   3   3  -2 1706.88  121.50 
  -3   3   2 1852.50  128.78 
   3  -3  -2 1973.81  144.54 
   3   3  -2 1882.98  133.90 
  -3  -3   2 1954.97  147.37 
   3  -3  -2 1734.80  127.42 
  -3   3   1 3165.72  219.87 
   3   3  -1 3067.68  212.15 
   3  -3  -1 3265.33  227.96 
  -3  -3   1 3067.37  212.52 
   3  -3  -1 2950.71  230.20 
  -3  -3   1 2844.94  212.19 
  -3   3   1 2711.95  199.46 
   3   3  -1 2988.41  214.68 
  -3  -3   1 2962.70  216.15 
  -3   3   1 2908.89  203.76 
   3   3  -1 2842.44  211.59 
   3  -3  -1 3205.52  224.41 
  -3  -3   1 3017.43  216.55 
  -3   3   1 3303.87  230.55 
  -3  -3   1 3030.61  233.61 
   3   3  -1 2982.92  216.82 
   3  -3  -1 3266.68  254.26 
   3   3  -1 3340.06  232.60 
   3  -3  -1 3069.63  240.02 
   3   3  -1 3195.90  222.94 
   3  -3  -1 3231.31  248.95 
  -3   3   1 2899.62  202.70 
   3  -3  -1 3252.78  225.98 
   3  -3  -1 3062.47  220.41 
  -3  -3   1 2953.20  209.14 
   3  -3  -1 2954.53  211.24 
   3   3  -1 2529.43  188.82 
  -3   3   1 3216.49  223.92 
   3  -3  -1 3332.64  247.77 
  -3   3   1 2905.48  201.97 
   3   3  -1 2862.30  205.11 
  -3  -3   1 3222.90  231.84 
  -3  -3   0   22.05    2.08 
  -3   3   0   23.20    1.84 
   3   3   0   25.22    2.03 
   3  -3   0   23.22    1.92 
   3  -3   0   23.46    2.20 
  -3  -3   0   18.95    1.84 
  -3   3   0   21.21    1.75 
   3   3   0   22.57    1.73 
  -3  -3   0   21.09    2.14 
  -3   3   0   24.34    1.92 
   3   3   0   24.12    1.94 
  -3  -3   0   20.92    1.69 
  -3   3   0   26.69    2.26 
   3  -3   0   23.39    1.98 
  -3  -3   0   21.09    2.40 
   3  -3   0   22.85    2.05 
  -3  -3   0   20.30    2.03 
   3   3   0   24.91    2.03 
   3  -3   0   27.03    2.41 
   3   3   0   23.13    2.08 
   3  -3   0   21.97    1.91 
   3   3   0   23.19    1.87 
  -3  -3   0   21.20    1.65 
   3  -3   0   19.83    1.51 
  -3  -3   0   22.68    1.89 
   3   3   0   18.04    1.32 
  -3   3   0   30.25    2.25 
   3  -3   0   17.06    1.82 
  -3   3   0   27.53    2.08 
  -3  -3   0   24.74    1.88 
  -3  -3   0   25.15    2.29 
   3   3   0   23.39    1.73 
  -3  -3  -1   66.51    5.14 
  -3   3  -1   67.91    4.92 
   3   3   1   68.37    5.24 
   3  -3   1   67.55    4.99 
   3  -3   1   65.70    5.08 
  -3  -3  -1   64.05    5.58 
  -3   3  -1   56.25    4.10 
  -3  -3  -1   64.96    4.90 
  -3   3  -1   64.11    4.71 
   3   3   1   58.21    4.62 
  -3   3  -1   59.76    4.55 
   3  -3   1   69.14    5.28 
  -3  -3  -1   62.47    4.92 
   3  -3   1   62.72    5.16 
  -3  -3  -1   62.88    5.17 
   3   3   1   57.98    4.85 
   3  -3   1   64.74    5.34 
   3   3   1   59.58    5.06 
   3  -3   1   60.71    4.81 
  -3   3  -1   60.66    4.36 
   3   3   1   61.75    4.69 
   3  -3   1   63.82    4.62 
  -3  -3  -1   63.77    4.88 
   3   3   1   61.53    4.41 
   3  -3   1   64.23    5.15 
  -3  -3  -1   55.47    4.11 
  -3  -3  -1   58.21    4.36 
  -3  -3  -1   60.90    4.58 
  -3   3  -1   55.66    4.01 
  -3  -3  -1   58.85    4.87 
  -3   3  -1   61.83    4.48 
  -3   3  -1   64.76    4.67 
   3  -3   1   59.83    4.63 
  -3  -3  -1   52.36    4.43 
  -3   3  -1   60.44    4.36 
  -3   3  -1   63.12    4.51 
  -3  -3  -1   61.88    4.72 
   3   3   1   60.62    4.33 
   3  -3   1   62.16    4.71 
  -3  -3  -1   55.63    4.08 
  -3  -3  -2   14.70    1.45 
  -3   3  -2   11.58    1.32 
   3   3   2   14.70    1.33 
   3  -3   2   13.75    1.41 
   3  -3   2   11.47    1.51 
  -3  -3  -2   12.30    1.63 
  -3   3  -2   10.09    1.00 
  -3  -3  -2   13.04    1.37 
  -3   3  -2   10.63    1.35 
   3   3   2   11.79    1.24 
  -3   3  -2   11.56    1.32 
   3  -3   2   12.33    1.37 
  -3  -3  -2   11.15    1.55 
   3   3   2   13.39    1.32 
   3  -3   2   12.70    1.56 
   3   3   2   12.90    1.36 
   3  -3   2   13.79    1.51 
   3   3   2   12.74    1.54 
   3  -3   2   13.18    1.44 
  -3   3  -2   10.82    1.00 
   3   3   2   13.35    1.20 
   3  -3   2   13.61    1.21 
  -3  -3  -2   14.81    1.43 
  -3   3  -2    6.63    1.22 
   3   3   2   11.83    1.02 
   3  -3   2   14.35    1.39 
  -3  -3  -2   12.24    1.19 
  -3  -3  -2   11.68    1.17 
  -3   3  -2    9.77    0.93 
  -3  -3  -2   12.14    1.16 
  -3   3  -2   12.02    1.06 
  -3  -3  -2   13.87    1.51 
  -3   3  -2   12.69    1.20 
  -3   3  -2   12.50    1.10 
   3  -3   2   12.87    1.18 
  -3  -3  -2   13.31    1.39 
  -3   3  -2   11.99    1.09 
  -3  -3  -2   12.30    1.25 
  -3   3  -2   13.70    1.25 
  -3  -3  -2   12.95    1.29 
  -3   3  -2   10.76    0.95 
   3   3   2   13.12    1.13 
   3  -3   2   13.97    1.37 
  -3  -3  -2   12.15    1.15 
  -3  -3  -3  228.38   15.05 
  -3   3  -3  227.79   14.47 
   3   3   3  246.18   16.37 
   3  -3   3  225.77   15.40 
   3  -3   3  220.70   14.87 
  -3  -3  -3  220.72   16.21 
  -3   3  -3  214.83   13.47 
  -3  -3  -3  233.79   15.09 
  -3   3  -3  228.47   14.33 
   3   3   3  210.47   14.01 
  -3   3  -3  233.40   14.64 
   3  -3   3  239.66   15.85 
  -3  -3  -3  229.66   15.53 
   3   3   3  230.75   15.11 
   3  -3   3  224.87   15.05 
   3   3   3  241.29   15.27 
   3  -3   3  209.90   13.94 
   3   3   3  236.92   15.34 
   3  -3   3  210.02   14.05 
  -3   3  -3  219.17   14.01 
   3   3   3  216.88   14.86 
   3  -3   3  220.09   14.51 
  -3  -3  -3  220.94   14.27 
   3   3   3  202.41   14.07 
  -3  -3  -3  216.94   14.44 
  -3   3  -3  227.88   14.66 
  -3  -3  -3  235.94   15.23 
  -3   3  -3  216.80   13.64 
  -3  -3  -3  220.42   14.62 
  -3   3  -3  229.33   14.85 
  -3  -3  -3  259.31   16.23 
  -3   3  -3  237.58   14.82 
  -3   3  -3  105.69   30.45 
   3  -3   3  214.20   14.17 
  -3  -3  -3  248.48   15.56 
  -3   3  -3  234.08   14.68 
  -3  -3  -3  217.20   14.01 
  -3   3  -3  184.39   11.82 
  -3  -3  -3  243.22   15.91 
  -3   3  -3  208.88   13.26 
   3   3   3  224.54   13.99 
   3  -3   3  235.07   16.02 
  -3  -3  -3  227.41   14.80 
  -3  -3  -4  299.36   25.64 
  -3   3  -4  298.44   25.35 
   3   3   4  303.38   26.15 
   3  -3   4  307.28   26.76 
   3  -3   4  314.82   28.22 
  -3  -3  -4  339.82   28.99 
  -3   3  -4  348.20   29.46 
   3   3   4  317.45   26.82 
  -3   3  -4  334.16   28.27 
   3  -3   4  358.48   31.08 
  -3  -3  -4  291.74   25.12 
   3   3   4  320.89   28.10 
   3  -3   4  320.75   28.31 
   3   3   4  337.03   28.90 
   3  -3   4  301.78   27.03 
   3   3   4  324.81   28.03 
  -3   3  -4  311.88   26.43 
   3   3   4  296.12   25.39 
   3  -3   4  312.76   27.09 
  -3  -3  -4  304.05   25.87 
   3   3   4  281.21   25.07 
  -3  -3  -4  337.12   29.64 
  -3   3  -4  317.63   27.40 
  -3  -3  -4  347.02   29.75 
  -3   3  -4  321.93   27.24 
  -3  -3  -4  311.79   27.76 
  -3   3  -4  314.54   26.81 
  -3  -3  -4  355.54   30.10 
  -3   3  -4  337.49   28.50 
   3  -3   4  322.80   28.05 
  -3  -3  -4  376.93   31.98 
  -3   3  -4  336.86   28.46 
  -3  -3  -4  286.48   24.33 
  -3   3  -4  353.42   29.85 
  -3  -3  -4  313.24   27.24 
  -3   3  -4  304.35   25.95 
   3  -3   4  330.26   29.23 
  -3  -3  -4  322.29   28.31 
   3  -3   5  137.85   12.48 
  -3  -3  -5  136.22   11.72 
  -3   3  -5  144.38   11.80 
   3  -3   5  150.77   12.70 
  -3  -3  -5  131.56   10.96 
   3   3   5  145.32   12.26 
   3  -3   5  141.44   12.21 
   3   3   5  141.33   11.66 
   3   3   5  152.90   12.48 
  -3   3  -5  128.28   10.45 
   3  -3   5  134.25   11.23 
   3   3   5  139.37   11.34 
  -3  -3  -5  147.84   12.61 
  -3   3  -5  155.91   12.91 
  -3  -3  -5  161.24   13.22 
  -3   3  -5  147.49   12.04 
  -3  -3  -5  148.66   12.57 
  -3   3  -5  144.02   11.86 
  -3  -3  -5  154.54   12.79 
  -3   3  -5  152.20   12.34 
  -3   3  -5  154.05   12.74 
   3  -3   5  146.08   12.25 
  -3  -3  -5  164.02   13.37 
  -3   3  -5  143.20   11.60 
  -3   3  -5  153.05   12.42 
  -3  -3  -5  151.62   12.60 
  -3   3  -5  150.41   12.42 
   3  -3   5  164.97   14.86 
  -3  -3  -5  154.72   13.23 
   3   3   6  156.95   10.49 
   3  -3   6  175.26   13.02 
  -3  -3  -6  159.27   11.10 
  -3  -3  -6  164.14   11.16 
  -3  -3  -6  142.48   10.95 
  -3   3  -6  153.89   10.65 
   3   3   6  174.25   11.78 
  -3   3  -6  144.10   10.30 
  -3   3  -6  155.69   10.99 
  -3  -3  -6  166.35   11.32 
  -3   3  -6  165.92   11.14 
  -3   3  -6  163.90   11.11 
  -3  -3  -6  154.47   11.42 
  -3   3  -6  154.15   10.46 
   3  -3   6  157.48   11.97 
  -3  -3  -6  154.73   11.02 
   3  -3   7   46.49    4.40 
  -3  -3  -7   35.33    3.25 
  -3  -3  -7   36.89    3.25 
  -3   3  -7   35.35    3.14 
  -3  -3  -7   35.83    3.21 
  -3   3  -7   37.56    3.33 
   3   3   7   37.87    3.38 
  -3   3  -7   35.14    3.09 
  -3  -3  -7   37.90    3.45 
  -3   3  -7   39.68    3.44 
  -3   3  -7   40.12    3.49 
  -3  -3  -7   37.72    3.38 
  -3   3  -7   37.67    3.31 
  -3  -3  -7   37.11    3.39 
   3  -3   8   10.23    1.99 
  -3  -3  -8    8.97    1.68 
  -3  -3  -8    7.73    1.44 
  -3   3  -8    8.87    1.57 
  -3  -3  -8    8.25    1.63 
  -3   3  -8    9.14    1.70 
   3   3   8    8.06    1.50 
  -3   3  -8    9.65    1.78 
  -3   3  -8    7.92    1.41 
  -3   3  -8    9.74    1.73 
  -3  -3  -8    9.34    1.75 
  -3   3  -8    7.86    1.43 
   3  -3   8    9.64    1.77 
  -3  -3  -8    7.04    1.53 
   3   4 -11   16.37    2.42 
   3   4 -11   15.52    2.26 
   3   4 -11   17.15    2.44 
   3   4 -11   16.47    2.41 
   3   4 -11   16.05    2.38 
   3   4 -10   85.31    6.25 
   3  -4 -10   50.48    5.43 
   3   4 -10   79.60    5.89 
   3  -4 -10   79.07    6.01 
   3   4 -10   73.19    5.51 
   3   4 -10   91.94    6.93 
   3  -4 -10   71.16    5.27 
   3   4 -10   70.82    5.28 
  -3  -4  10   83.60    6.32 
   3  -4 -10   64.47    4.92 
   3  -4 -10   67.93    5.07 
   3   4  -9  206.70   17.71 
   3  -4  -9  190.45   16.93 
   3  -4  -9  186.89   15.95 
   3   4  -9  206.66   17.81 
  -3  -4   9  136.88   15.11 
   3  -4  -9  195.50   17.73 
   3   4  -9  200.48   17.45 
   3   4  -9  221.62   19.15 
   3  -4  -9  201.78   17.39 
   3   4  -9  190.45   16.61 
   3   4  -9  218.92   18.86 
   3   4  -9  190.08   16.43 
   3  -4  -9  193.87   16.82 
   3  -4  -9  192.30   16.57 
   3   4  -8  572.79   59.53 
   3  -4  -8  521.42   57.20 
   3  -4  -8  533.47   55.17 
   3   4  -8  610.28   63.31 
  -3  -4   8  446.24   48.01 
   3  -4  -8  532.30   57.46 
   3   4  -8  561.87   58.64 
   3   4  -8  534.17   55.91 
   3   4  -8  595.86   62.21 
   3  -4  -8  533.71   55.59 
   3   4  -8  495.37   51.81 
   3   4  -8  601.96   62.72 
   3   4  -8  562.82   58.98 
   3  -4  -8  545.19   56.21 
   3  -4  -8  547.76   57.21 
   3  -4  -7   20.40    2.32 
  -3   4   7   16.22    1.82 
   3   4  -7   19.89    2.09 
  -3  -4   7   24.85    3.05 
  -3   4   7   18.37    1.87 
   3   4  -7   17.00    1.69 
  -3  -4   7   19.00    2.35 
   3  -4  -7   17.99    2.21 
   3  -4  -7   14.35    2.65 
   3  -4  -7   19.27    2.42 
   3   4  -7   19.66    1.75 
   3  -4  -7   16.77    1.56 
   3  -4  -7   20.33    1.95 
   3  -4  -7   18.57    1.71 
   3   4  -7   20.52    2.11 
  -3  -4   7   16.76    1.74 
   3  -4  -7   20.26    2.12 
   3   4  -7   18.37    1.63 
   3   4  -7   17.73    1.71 
   3   4  -7   19.97    1.98 
   3  -4  -7   19.02    2.11 
   3   4  -7   17.36    1.64 
   3   4  -7   20.54    1.84 
   3  -4  -7   18.98    1.86 
   3  -4  -7   18.15    1.91 
   3  -4  -6   12.82    1.94 
  -3   4   6   11.88    1.46 
   3   4  -6   14.87    1.56 
  -3  -4   6   14.31    1.92 
  -3   4   6   13.94    1.48 
   3   4  -6   12.55    1.43 
  -3  -4   6   12.87    2.26 
   3  -4  -6   15.24    1.95 
   3  -4  -6   12.17    1.85 
   3  -4  -6   12.11    1.85 
   3   4  -6   13.09    1.10 
   3  -4  -6   13.82    1.25 
   3  -4  -6   13.20    1.55 
   3  -4  -6   13.64    1.39 
   3   4  -6   15.39    1.58 
  -3  -4   6   13.36    1.37 
   3  -4  -6   15.35    1.58 
   3   4  -6   11.38    1.35 
   3   4  -6   12.90    1.25 
   3   4  -6   10.22    1.68 
   3  -4  -6   14.59    1.50 
   3   4  -6   11.98    1.25 
   3   4  -6   19.66    1.60 
   3   4  -6   16.90    1.56 
   3   4  -6   15.96    1.28 
   3  -4  -6   17.58    1.50 
   3  -4  -6   15.89    1.62 
   3   4  -5  496.29   36.46 
  -3  -4   5  492.79   37.77 
   3  -4  -5  503.45   37.46 
  -3   4   5  464.15   33.70 
   3   4  -5  475.90   35.51 
  -3  -4   5  565.97   42.18 
  -3   4   5  493.60   35.79 
   3   4  -5  489.75   37.04 
   3   4  -5  455.92   34.10 
  -3  -4   5  511.16   38.53 
   3  -4  -5  491.08   37.99 
   3  -4  -5  498.03   38.11 
   3  -4  -5  473.46   37.56 
   3   4  -5  478.85   34.83 
  -3  -4   5  481.35   36.16 
   3   4  -5  524.15   37.65 
   3  -4  -5  442.22   31.75 
   3  -4  -5  552.37   44.82 
   3  -4  -5  517.43   37.97 
   3   4  -5  523.82   38.34 
  -3  -4   5  451.21   34.19 
   3  -4  -5  515.76   39.09 
   3   4  -5  509.21   37.42 
   3   4  -5  472.05   35.02 
   3   4  -5  443.28   46.37 
   3  -4  -5  477.41   38.65 
   3   4  -5  476.86   35.06 
   3   4  -5  370.06   28.59 
  -3  -4   5  563.04   45.10 
   3   4  -5  507.17   37.06 
   3  -4  -5  565.91   40.71 
   3  -4  -5  528.84   41.83 
  -3   4   4   12.23    1.34 
   3   4  -4   12.90    1.54 
   3  -4  -4   11.24    1.35 
  -3  -4   4   12.87    1.94 
   3  -4  -4   15.24    1.93 
  -3   4   4   16.47    1.83 
   3   4  -4   14.80    1.49 
  -3  -4   4   13.90    1.88 
  -3   4   4   16.61    2.06 
   3   4  -4   14.78    1.53 
   3   4  -4   12.76    1.60 
  -3  -4   4   15.30    2.12 
   3  -4  -4   16.06    2.04 
   3  -4  -4   12.89    1.75 
   3  -4  -4   14.85    1.84 
   3   4  -4   13.86    1.42 
  -3  -4   4   15.72    1.74 
   3   4  -4   15.39    1.50 
   3  -4  -4   13.24    1.32 
   3  -4  -4   16.28    1.65 
   3  -4  -4   14.54    1.62 
   3   4  -4   17.36    1.78 
  -3  -4   4   18.01    2.02 
   3  -4  -4   16.39    1.81 
   3   4  -4   16.14    1.59 
   3   4  -4   13.81    1.42 
  -3   4   4   16.93    1.68 
   3   4  -4   16.00    1.59 
   3  -4  -4   16.47    1.80 
   3   4  -4   13.85    1.41 
   3   4  -4   18.56    1.80 
  -3  -4   4   18.61    2.12 
   3   4  -4   16.62    1.58 
   3  -4  -4   19.64    2.01 
   3  -4  -4   15.60    1.77 
  -3   4   3    7.89    1.03 
   3   4  -3    7.02    1.17 
   3  -4  -3    7.11    1.05 
  -3  -4   3    6.52    1.63 
   3  -4  -3    4.26    1.16 
  -3   4   3    6.26    1.21 
   3   4  -3    6.75    0.88 
  -3  -4   3    6.48    1.66 
  -3   4   3    6.17    0.94 
   3   4  -3    6.93    0.94 
  -3   4   3    8.82    1.17 
   3   4  -3    5.41    1.16 
  -3  -4   3    7.05    1.45 
   3  -4  -3    6.95    1.33 
   3  -4  -3    8.16    1.37 
   3  -4  -3    7.86    1.52 
  -3   4   3    7.64    0.77 
   3   4  -3    6.89    0.79 
   3  -4  -3    7.32    0.83 
  -3  -4   3    6.18    0.94 
   3   4  -3    6.06    0.81 
   3  -4  -3    5.68    0.83 
   3   4  -3    6.43    0.66 
   3  -4  -3    8.39    1.03 
   3  -4  -3    6.27    1.18 
   3   4  -3    6.99    1.08 
  -3  -4   3    8.75    1.08 
   3  -4  -3    6.44    0.95 
   3   4  -3    8.60    0.90 
  -3   4   3    5.37    0.81 
   3   4  -3    7.14    0.83 
   3  -4  -3    7.41    1.11 
   3   4  -3    6.61    0.69 
   3   4  -3    7.07    0.87 
  -3  -4   3    5.50    1.24 
   3   4  -3    7.53    0.89 
   3  -4  -3    5.12    0.99 
   3  -4  -3    6.97    1.15 
  -3   4   2  952.97   75.09 
   3   4  -2 1004.25   81.05 
   3  -4  -2 1098.08   89.41 
  -3  -4   2  937.96   81.14 
   3  -4  -2  977.93   82.94 
  -3   4   2 1051.18   81.17 
   3   4  -2  904.18   76.17 
  -3  -4   2  936.59   74.49 
  -3   4   2  965.70   75.78 
   3   4  -2 1097.81   85.14 
  -3  -4   2  970.60   77.66 
  -3   4   2  976.95   76.53 
  -3  -4   2  965.25   80.39 
   3  -4  -2  978.57   85.80 
   3  -4  -2  993.71   83.82 
   3  -4  -2  987.25   81.26 
  -3   4   2  985.01   77.51 
   3   4  -2 1003.40   79.47 
   3  -4  -2 1017.43   83.34 
  -3  -4   2  998.48   80.55 
  -3   4   2  932.78   75.19 
   3   4  -2  951.62   74.16 
   3   4  -2 1036.93   80.22 
   3  -4  -2  933.39   77.36 
   3  -4  -2 1127.83   90.84 
  -3  -4   2 1014.24   80.00 
  -3  -4   2  988.66   81.49 
   3  -4  -2  984.98   79.77 
   3   4  -2  979.48   77.51 
  -3   4   2 1054.76   81.75 
   3  -4  -2 1044.22   87.44 
   3   4  -2 1036.11   82.15 
  -3  -4   2 1113.09   89.58 
   3   4  -2 1004.36   80.67 
   3  -4  -2 1095.00   84.73 
   3  -4  -2 1077.86   95.19 
  -3   4   1  988.92   78.37 
   3   4  -1  963.99   77.08 
   3  -4  -1 1037.25   83.97 
  -3  -4   1  926.47   75.42 
   3  -4  -1  914.11   76.02 
  -3  -4   1  851.39   70.76 
  -3   4   1  913.51   70.83 
   3   4  -1  873.32   69.33 
  -3  -4   1  934.92   74.24 
  -3   4   1  877.25   70.00 
   3   4  -1  956.12   74.33 
  -3   4   1  935.36   73.35 
  -3  -4   1  945.08   79.23 
   3  -4  -1  977.26   80.24 
   3  -4  -1  926.64   78.35 
   3   4  -1  922.91   72.50 
   3  -4  -1  930.07   74.78 
  -3   4   1  961.56   75.93 
   3   4  -1  959.55   77.38 
   3  -4  -1 1013.16   82.00 
  -3  -4   1  913.85   78.37 
  -3   4   1  938.90   73.10 
   3   4  -1  821.97   64.71 
   3   4  -1  953.41   74.25 
   3  -4  -1  958.76   77.55 
  -3  -4   1 1054.81   83.14 
  -3  -4   1 1027.26   81.83 
   3  -4  -1  859.47   69.52 
   3   4  -1  909.87   71.66 
  -3   4   1  951.30   74.15 
   3  -4  -1 1016.27   82.04 
  -3   4   1  942.77   72.98 
  -3  -4   1  880.22   70.40 
  -3  -4   1 1052.40   84.50 
   3   4  -1 1034.87   80.02 
   3  -4  -1  824.86   68.60 
   3  -4  -1 1028.96   86.70 
  -3  -4   0  176.24   17.09 
  -3   4   0  196.69   17.89 
   3   4   0  179.12   16.87 
   3  -4   0  200.83   18.91 
   3  -4   0  188.88   17.83 
  -3  -4   0  148.28   14.22 
  -3   4   0  160.05   14.59 
   3   4   0  164.94   15.06 
  -3  -4   0  182.78   16.69 
   3   4   0  192.08   17.29 
  -3   4   0  191.78   17.28 
  -3  -4   0  184.38   17.88 
   3  -4   0  180.69   17.58 
  -3  -4   0  163.33   15.48 
   3   4   0  165.05   15.05 
   3  -4   0  182.75   17.23 
   3   4   0  168.63   16.37 
   3  -4   0  177.71   17.35 
  -3   4   0  182.21   16.45 
   3   4   0  185.54   17.30 
   3  -4   0  182.60   17.06 
  -3  -4   0  182.62   17.29 
  -3   4   0  161.54   14.76 
   3   4   0  157.82   14.13 
   3  -4   0  181.37   17.99 
  -3  -4   0  157.37   14.42 
  -3  -4   0  183.44   16.89 
   3  -4   0  179.52   16.28 
  -3  -4   0  182.39   16.97 
  -3  -4   0  160.60   16.72 
   3   4   0  174.35   16.03 
  -3   4   0  167.45   15.78 
   3  -4   0  185.54   17.38 
  -3   4   0  195.78   17.56 
   3   4   0  199.65   17.93 
   3  -4   0  189.49   19.11 
  -3  -4  -1  177.73   16.80 
  -3   4  -1  187.82   17.02 
   3   4   1  179.74   16.59 
   3  -4   1  179.77   16.72 
   3  -4   1  173.56   17.05 
  -3  -4  -1  170.96   15.83 
  -3   4  -1  167.76   15.07 
  -3  -4  -1  180.22   16.53 
   3   4   1  164.12   15.84 
  -3   4  -1  170.99   15.89 
  -3  -4  -1  182.42   17.75 
   3  -4   1  175.84   17.01 
  -3  -4  -1  157.20   15.06 
   3   4   1  185.38   16.95 
   3   4   1  163.74   16.06 
   3  -4   1  165.95   15.49 
  -3   4  -1  179.65   16.21 
   3   4   1  178.15   16.52 
   3  -4   1  182.74   16.76 
  -3  -4  -1  178.39   16.40 
  -3   4  -1  171.80   15.49 
   3   4   1  185.01   16.61 
   3  -4   1  187.39   17.68 
  -3  -4  -1  159.01   14.57 
  -3  -4  -1  177.03   16.48 
   3  -4   1  164.48   15.16 
  -3  -4  -1  178.87   16.92 
  -3  -4  -1  151.29   13.92 
  -3   4  -1  152.89   13.70 
   3   4   1  155.65   14.28 
  -3   4  -1  181.73   16.33 
  -3   4  -1  186.98   16.92 
   3  -4   1  153.57   14.93 
  -3  -4  -1  166.83   15.02 
  -3   4  -1  177.86   16.09 
  -3  -4  -1  191.91   18.20 
   3   4   1  184.79   16.59 
   3  -4   1  184.75   18.37 
  -3  -4  -2  213.78   15.88 
  -3   4  -2  214.44   15.59 
   3   4   2  220.95   16.19 
   3  -4   2  223.96   16.66 
   3  -4   2  208.14   16.16 
  -3  -4  -2  205.44   16.00 
  -3   4  -2  210.01   15.09 
  -3  -4  -2  227.89   16.82 
  -3   4  -2  231.68   16.63 
   3   4   2  214.39   15.41 
  -3   4  -2  221.30   16.14 
   3  -4   2  218.27   16.28 
  -3  -4  -2  210.85   15.72 
   3  -4   2  217.22   16.78 
  -3  -4  -2  170.64   17.18 
   3   4   2  234.27   17.42 
   3  -4   2  209.22   15.93 
   3   4   2  247.40   17.87 
   3  -4   2  200.38   15.06 
  -3   4  -2  214.21   15.56 
   3   4   2  224.26   16.81 
   3  -4   2  222.97   16.55 
  -3  -4  -2  228.26   16.86 
  -3   4  -2  160.33   13.12 
   3   4   2  203.24   16.49 
   3  -4   2  204.49   16.72 
  -3  -4  -2  206.23   15.90 
  -3  -4  -2  223.82   16.39 
  -3  -4  -2  213.89   16.55 
  -3  -4  -2  247.59   17.95 
  -3   4  -2  243.24   17.39 
  -3   4  -2  233.46   16.86 
   3  -4   2  221.89   16.49 
  -3  -4  -2  204.54   14.67 
  -3   4  -2  232.16   16.63 
  -3   4  -2  230.25   16.46 
  -3  -4  -2  230.78   17.35 
   3   4   2  236.89   16.94 
   3  -4   2  227.36   18.16 
  -3  -4  -2  203.92   15.20 
  -3  -4  -3  250.17   18.29 
  -3   4  -3  249.29   18.14 
   3   4   3  262.05   19.70 
   3  -4   3  246.81   18.50 
   3  -4   3  263.12   20.56 
  -3  -4  -3  259.46   19.73 
  -3   4  -3  257.44   18.52 
  -3   4  -3  251.72   18.24 
   3   4   3  251.48   19.35 
  -3   4  -3  246.13   18.16 
   3  -4   3  262.38   19.58 
  -3  -4  -3  246.15   18.90 
   3   4   3  272.86   20.87 
   3  -4   3  266.78   20.16 
   3   4   3  286.60   21.68 
   3  -4   3  245.38   18.64 
   3   4   3  270.29   20.31 
  -3   4  -3  266.36   19.42 
   3   4   3  265.48   19.82 
   3  -4   3  260.90   19.75 
  -3  -4  -3  264.70   19.32 
  -3   4  -3  233.16   16.84 
   3   4   3  291.59   20.90 
   3  -4   3  298.58   23.83 
  -3  -4  -3  259.22   19.63 
  -3  -4  -3  281.81   20.54 
  -3  -4  -3  274.00   20.98 
  -3   4  -3  266.05   19.42 
  -3  -4  -3  293.48   21.34 
  -3   4  -3  283.98   20.39 
  -3   4  -3  275.71   23.65 
   3  -4   3  259.56   19.24 
  -3   4  -3  283.66   20.38 
  -3   4  -3  297.44   21.33 
  -3  -4  -3  273.47   20.83 
  -3   4  -3  256.33   18.49 
   3   4   3  263.22   19.27 
   3  -4   3  289.58   22.22 
  -3  -4  -3  256.31   19.20 
  -3   4  -4  503.70   41.07 
   3  -4   4  507.56   42.95 
   3  -4   4  537.36   45.19 
  -3  -4  -4  500.24   41.84 
  -3   4  -4  567.83   45.96 
   3   4   4  568.26   45.93 
  -3   4  -4  555.05   44.87 
  -3  -4  -4  504.62   41.84 
   3   4   4  505.00   42.19 
   3  -4   4  521.47   43.36 
   3   4   4  522.71   43.33 
   3   4   4  527.66   43.87 
  -3   4  -4  532.69   43.33 
   3   4   4  495.99   40.82 
   3  -4   4  531.76   44.02 
  -3  -4  -4  539.01   43.91 
   3   4   4  588.00   47.51 
   3  -4   4  557.83   50.89 
  -3  -4  -4  529.45   44.68 
  -3  -4  -4  574.31   47.42 
  -3   4  -4  551.58   44.79 
  -3  -4  -4  552.45   45.86 
  -3   4  -4  550.80   45.23 
  -3  -4  -4  615.26   49.86 
  -3   4  -4  571.76   46.22 
  -3   4  -4  598.85   48.46 
  -3  -4  -4  555.77   45.66 
  -3   4  -4  548.59   44.32 
  -3   4  -4  313.05   47.51 
  -3  -4  -4  556.15   46.94 
  -3   4  -4  518.59   42.23 
   3   4   4  484.81   40.30 
   3  -4   4  541.36   46.34 
  -3  -4  -4  517.06   43.08 
  -3   4  -5  234.03   24.13 
   3  -4   5  226.58   23.90 
   3   4   5  246.88   25.44 
   3  -4   5  266.73   29.20 
  -3  -4  -5  242.48   25.38 
  -3  -4  -5  259.12   26.79 
  -3   4  -5  224.27   23.12 
  -3  -4  -5  248.29   26.06 
  -3   4  -5  256.51   26.61 
  -3  -4  -5  232.72   25.24 
  -3   4  -5  261.20   26.82 
  -3   4  -5  111.30   40.50 
  -3  -4  -5  241.49   25.45 
  -3   4  -5  182.93   18.96 
  -3   4  -5  245.87   25.39 
  -3  -4  -5  264.23   27.47 
  -3   4  -5  241.07   24.84 
   3  -4   5  254.16   27.53 
  -3  -4  -5  235.88   24.71 
   3   4   6  424.25   36.11 
   3  -4   6  468.22   41.68 
  -3  -4  -6  421.84   36.30 
  -3  -4  -6  460.91   39.43 
  -3   4  -6  415.50   35.46 
  -3  -4  -6  430.23   37.17 
  -3   4  -6  415.59   35.66 
   3   4   6  468.07   40.22 
  -3   4  -6  463.02   39.31 
  -3   4  -6  285.50   43.45 
  -3  -4  -6  424.73   37.42 
  -3   4  -6  443.84   37.69 
  -3   4  -6  460.73   39.18 
  -3  -4  -6  455.92   39.32 
  -3   4  -6  400.30   34.20 
   3  -4   6  418.24   38.05 
  -3  -4  -6  416.61   36.68 
   3   4   7  156.51   11.41 
   3  -4   7  145.25   11.80 
  -3  -4  -7  159.82   11.78 
  -3  -4  -7  159.19   11.72 
  -3   4  -7  151.20   11.06 
  -3  -4  -7  149.63   11.60 
   3   4   7  154.69   11.61 
  -3   4  -7  117.79    8.60 
  -3   4  -7  168.25   12.22 
  -3  -4  -7  157.18   11.91 
  -3   4  -7  154.05   11.60 
  -3   4  -7  152.24   11.33 
  -3  -4  -7  158.91   11.82 
  -3   4  -7  148.92   10.91 
   3  -4   7  142.35   11.05 
  -3  -4  -7  145.85   10.91 
   3  -4   8  224.15   28.85 
  -3  -4  -8  213.66   27.43 
   3  -4   8  211.75   27.18 
  -3  -4  -8  218.73   27.85 
  -3   4  -8  267.86   35.97 
  -3   4  -8  226.97   28.74 
  -3   4  -8  231.07   29.29 
  -3  -4  -8  230.89   29.32 
  -3  -4  -8  198.41   25.31 
   3   5 -10   97.95   12.87 
   3  -5 -10   82.26   10.94 
   3   5 -10  101.70   13.39 
   3  -5 -10   80.81   10.71 
   3   5 -10   87.59   11.69 
   3   5 -10  109.28   14.45 
   3  -5 -10   89.80   11.85 
   3   5 -10   94.73   12.50 
   3   5 -10  101.42   13.38 
  -3  -5  10   76.41   10.49 
   3  -5 -10   88.58   11.69 
   3   5  -9   61.38    9.33 
   3  -5  -9   78.14    7.57 
   3  -5  -9   89.45    7.52 
   3   5  -9   97.54    8.22 
  -3  -5   9   81.47    6.91 
   3  -5  -9   85.65    7.37 
   3   5  -9   89.99    7.65 
   3   5  -9   58.54   11.57 
   3  -5  -9   92.02    7.80 
   3   5  -9   86.98    7.45 
   3   5  -9   93.26    7.87 
  -3  -5   9   97.42    8.34 
   3  -5  -9   90.44    7.75 
   3  -5  -9   89.15    7.71 
   3   5  -8   50.99    5.20 
   3  -5  -8   76.01    6.91 
   3  -5  -8   74.12    6.41 
   3   5  -8   77.17    8.53 
  -3  -5   8   65.79    5.97 
   3  -5  -8   70.17    6.38 
  -3   5   8   59.61    5.12 
   3   5  -8   61.41    6.30 
   3   5  -8   72.77    6.36 
   3   5  -8   80.61    6.95 
   3  -5  -8   74.42    6.63 
   3   5  -8   72.43    6.36 
   3   5  -8   69.31    6.07 
  -3  -5   8   74.96    6.77 
   3  -5  -8   88.95    7.68 
   3  -5  -8   71.04    6.44 
   3   5  -7  334.48   22.39 
   3  -5  -7  317.71   23.09 
   3  -5  -7  321.34   22.24 
   3   5  -7  304.21   22.19 
  -3  -5   7  289.14   20.92 
   3  -5  -7  310.79   22.69 
   3   5  -7  337.12   22.67 
   3   5  -7  297.94   20.70 
   3   5  -7  342.34   23.15 
   3  -5  -7  318.44   22.12 
   3   5  -7  297.02   20.55 
   3   5  -7  334.89   23.05 
  -3  -5   7  333.83   23.79 
   3  -5  -7  318.78   25.54 
   3  -5  -7  303.17   22.25 
   3  -5  -6  158.01   12.79 
   3   5  -6  132.11   11.55 
  -3  -5   6  149.60   12.32 
  -3   5   6  151.41   12.21 
   3   5  -6  135.87   11.10 
  -3  -5   6  130.41   10.86 
   3  -5  -6  149.29   12.21 
   3  -5  -6  118.83   10.00 
   3  -5  -6  134.79   11.17 
   3   5  -6  142.15   11.39 
  -3   5   6  137.26   10.99 
   3   5  -6  149.22   13.26 
   3  -5  -6  151.16   13.81 
   3  -5  -6  160.47   13.16 
   3   5  -6  153.36   12.37 
  -3  -5   6  157.58   13.54 
   3  -5  -6  147.11   12.55 
   3   5  -6  144.15   12.44 
   3   5  -6  135.54   11.11 
   3   5  -6  163.41   13.27 
   3  -5  -6  154.06   12.78 
   3   5  -6  133.18   11.55 
   3   5  -6  155.23   12.57 
  -3  -5   6  157.68   13.05 
   3  -5  -6  158.65   13.65 
   3  -5  -6  151.78   12.92 
   3   5  -5  817.69   86.31 
  -3  -5   5  801.34   85.48 
   3  -5  -5  903.47   95.84 
  -3   5   5  771.27   81.87 
   3   5  -5  778.32   81.86 
  -3  -5   5  848.82   90.16 
  -3   5   5  863.39   90.79 
   3   5  -5  792.46   84.50 
  -3  -5   5  808.11   86.63 
   3  -5  -5  867.37   92.63 
   3  -5  -5  778.46   83.81 
   3  -5  -5  799.05   86.16 
   3   5  -5  853.80   90.22 
  -3  -5   5  852.99   91.12 
  -3   5   5  757.76   81.66 
   3   5  -5  794.78   83.45 
   3  -5  -5  903.88  100.91 
   3  -5  -5  926.56  100.00 
   3   5  -5  927.49   98.10 
  -3  -5   5  856.29   92.00 
   3  -5  -5  856.78   94.10 
   3   5  -5  942.94   99.22 
   3   5  -5  748.30   80.32 
   3   5  -5  741.76   98.35 
   3  -5  -5  884.71   94.49 
   3   5  -5  802.57   85.16 
   3   5  -5  847.40   90.24 
  -3  -5   5  919.15   98.95 
   3   5  -5  863.07   92.13 
   3  -5  -5  897.54  100.79 
   3  -5  -5  858.66   95.33 
   3   5  -4  507.39   37.21 
   3  -5  -4  463.23   34.60 
  -3  -5   4  512.83   38.69 
   3  -5  -4  512.70   38.70 
  -3   5   4  519.86   37.39 
   3   5  -4  512.71   37.81 
  -3  -5   4  517.63   38.39 
  -3   5   4  473.68   34.24 
   3   5  -4  492.94   36.28 
   3   5  -4  457.69   33.79 
  -3  -5   4  495.85   38.38 
   3  -5  -4  479.85   36.25 
   3  -5  -4  478.80   37.63 
   3  -5  -4  465.68   35.19 
   3   5  -4  528.08   38.86 
   3  -5  -4  482.23   35.59 
  -3  -5   4  508.32   38.25 
  -3   5   4  462.47   33.63 
   3   5  -4  547.61   39.43 
   3  -5  -4  528.71   42.45 
   3  -5  -4  532.38   41.00 
   3   5  -4  510.08   37.91 
  -3  -5   4  483.30   35.95 
   3  -5  -4  508.59   39.08 
   3   5  -4  552.89   39.80 
   3   5  -4  443.82   32.51 
  -3   5   4  467.94   34.09 
   3   5  -4  534.68   39.12 
   3  -5  -4  505.59   38.93 
   3   5  -4  453.59   33.30 
   3   5  -4  518.20   37.94 
  -3  -5   4  519.11   39.83 
   3   5  -4  487.19   37.30 
   3  -5  -4  517.84   39.15 
   3  -5  -4  505.73   38.32 
  -3   5   3  259.67   22.32 
   3   5  -3  238.38   20.48 
   3  -5  -3  239.12   21.36 
  -3  -5   3  237.47   21.25 
   3  -5  -3  237.00   21.16 
  -3   5   3  244.39   20.74 
   3   5  -3  217.90   19.65 
  -3  -5   3  240.67   20.66 
  -3   5   3  241.85   20.76 
   3   5  -3  220.13   19.45 
  -3  -5   3  243.06   21.34 
   3  -5  -3  190.44   17.03 
   3  -5  -3  229.19   20.70 
   3  -5  -3  238.58   21.90 
  -3   5   3  237.96   20.49 
   3   5  -3  254.74   22.17 
   3  -5  -3  248.64   22.50 
  -3  -5   3  247.51   22.11 
  -3   5   3  249.06   21.20 
   3   5  -3  220.94   18.70 
   3  -5  -3  239.18   21.48 
   3  -5  -3  254.20   23.38 
  -3  -5   3  251.99   21.83 
  -3  -5   3  247.06   21.60 
   3  -5  -3  242.45   21.21 
   3   5  -3  211.59   18.11 
  -3   5   3  231.49   21.28 
   3   5  -3  249.25   21.43 
   3  -5  -3  264.79   23.87 
   3   5  -3  241.02   20.87 
  -3  -5   3  295.61   25.63 
   3   5  -3  209.66   18.27 
   3  -5  -3  284.67   24.19 
   3  -5  -3  233.61   21.99 
  -3   5   2  242.92   17.94 
   3   5  -2  271.58   20.21 
   3  -5  -2  269.20   20.30 
  -3  -5   2  261.76   20.23 
   3  -5  -2  249.84   18.81 
  -3   5   2  240.73   17.88 
   3   5  -2  224.52   17.75 
  -3  -5   2  262.07   19.17 
  -3   5   2  250.95   18.22 
   3   5  -2  269.16   19.39 
  -3  -5   2  270.53   20.52 
   3  -5  -2  251.05   19.00 
   3  -5  -2  228.92   19.90 
   3  -5  -2  251.35   18.96 
  -3   5   2  308.44   22.19 
   3   5  -2  264.08   20.20 
   3  -5  -2  263.73   19.65 
  -3  -5   2  259.37   21.22 
  -3   5   2  231.71   18.89 
   3   5  -2  228.51   16.60 
   3   5  -2  256.32   18.81 
   3  -5  -2  229.86   17.98 
   3  -5  -2  266.43   20.64 
  -3  -5   2  255.35   18.76 
  -3  -5   2  256.32   19.52 
   3  -5  -2  249.35   18.33 
   3  -5  -2  247.74   18.23 
   3   5  -2  247.28   17.80 
  -3   5   2  268.12   19.52 
   3  -5  -2  261.46   20.19 
  -3  -5   2  215.82   16.97 
   3   5  -2  290.43   20.89 
   3  -5  -2  247.89   19.45 
   3  -5  -2  267.54   21.33 
  -3   5   1  289.86   21.37 
   3   5  -1  280.68   20.90 
   3  -5  -1  297.06   23.35 
  -3  -5   1  292.77   22.13 
   3  -5  -1  276.35   20.63 
  -3   5   1  270.38   19.47 
   3   5  -1  260.30   19.40 
  -3  -5   1  275.05   19.97 
  -3   5   1  273.50   19.70 
   3   5  -1  300.92   21.66 
  -3   5   1  289.36   20.89 
  -3  -5   1  294.55   22.53 
   3  -5  -1  277.77   22.60 
   3  -5  -1  277.43   21.88 
  -3   5   1  300.28   21.63 
   3   5  -1  308.15   22.79 
   3  -5  -1  297.57   22.39 
  -3  -5   1  302.66   22.66 
  -3   5   1  292.56   21.03 
   3   5  -1  262.10   19.37 
   3   5  -1  275.29   21.34 
   3  -5  -1  299.19   22.97 
  -3  -5   1  286.57   21.02 
   3  -5  -1  280.00   20.53 
  -3  -5   1  287.95   22.52 
   3  -5  -1  244.68   18.13 
  -3   5   1  261.18   18.82 
   3   5  -1  259.13   18.55 
  -3   5   1  313.16   22.73 
   3  -5  -1  294.50   22.39 
   3   5  -1  290.12   22.08 
   3  -5  -1  198.75   16.71 
   3  -5  -1  306.32   24.45 
  -3  -5   0  733.58   66.79 
  -3   5   0  733.87   62.56 
   3   5   0  740.66   65.38 
   3  -5   0  792.25   69.19 
   3  -5   0  714.29   62.70 
  -3  -5   0  628.95   56.33 
  -3   5   0  738.15   62.43 
   3   5   0  811.04   68.66 
  -3   5   0  740.34   62.88 
  -3  -5   0  727.01   62.83 
   3  -5   0  730.33   66.95 
   3  -5   0  731.05   64.75 
   3  -5   0  708.43   61.55 
  -3   5   0  772.94   66.13 
   3   5   0  803.40   71.05 
   3  -5   0  816.08   71.31 
  -3  -5   0  761.16   68.76 
  -3   5   0  787.26   66.59 
   3   5   0  806.24   68.64 
   3  -5   0  809.11   72.90 
  -3  -5   0  660.54   57.65 
  -3  -5   0  784.48   67.38 
   3  -5   0  651.14   57.52 
  -3  -5   0  787.20   71.26 
   3   5   0  733.63   67.11 
  -3   5   0  752.25   63.51 
   3   5   0  771.49   65.31 
  -3   5   0  852.13   72.16 
   3  -5   0  767.90   67.46 
  -3   5   0  622.86   63.74 
  -3  -5   0  809.21   70.48 
   3   5   0  870.76   73.76 
   3  -5   0  803.88   75.26 
  -3  -5  -1  136.77   10.33 
  -3   5  -1  143.49   10.54 
   3   5   1  144.42   10.81 
   3  -5   1  147.91   11.29 
   3  -5   1  138.25   11.08 
  -3  -5  -1  122.83    9.57 
  -3   5  -1  129.70    9.60 
   3   5   1  152.84   11.08 
  -3   5  -1  157.90   11.42 
  -3  -5  -1  140.78   10.79 
   3  -5   1  130.05   10.11 
   3  -5   1  140.50   10.78 
   3   5   1  139.68   10.30 
  -3   5  -1  146.98   10.74 
   3   5   1  145.47   11.16 
   3  -5   1  152.51   11.38 
  -3  -5  -1  151.91   11.45 
  -3   5  -1  148.78   10.72 
   3   5   1  136.44   11.33 
   3  -5   1  151.69   11.73 
  -3  -5  -1  126.68    9.73 
  -3  -5  -1  141.26   10.38 
   3  -5   1  114.00   10.78 
  -3  -5  -1  143.01   11.18 
  -3  -5  -1  147.71   11.67 
  -3   5  -1  129.99    9.35 
   3   5   1  137.09    9.91 
  -3   5  -1  151.10   10.86 
  -3   5  -1  158.41   11.61 
   3  -5   1  140.81   10.45 
  -3   5  -1  153.40   11.06 
  -3  -5  -1  151.54   11.43 
   3   5   1  163.05   11.77 
   3  -5   1  151.41   12.00 
  -3  -5  -2  541.04   57.39 
  -3   5  -2  523.88   55.31 
   3   5   2  545.75   58.24 
   3  -5   2  543.58   58.77 
   3  -5   2  541.21   58.48 
  -3  -5  -2  521.11   55.48 
  -3   5  -2  555.88   58.43 
   3   5   2  538.73   57.09 
  -3   5  -2  539.02   56.58 
  -3  -5  -2  527.51   56.23 
   3  -5   2  531.52   57.21 
   3  -5   2  515.56   55.29 
   3   5   2  494.07   52.92 
  -3   5  -2  572.04   60.43 
   3   5   2  565.57   60.67 
   3  -5   2  556.40   59.73 
  -3  -5  -2  575.00   61.24 
  -3   5  -2  548.44   57.60 
   3   5   2  620.00   65.15 
   3  -5   2  594.35   64.64 
  -3  -5  -2  504.49   54.23 
  -3  -5  -2  572.73   60.63 
   3  -5   2  550.03   59.23 
  -3  -5  -2  554.30   60.23 
  -3  -5  -2  496.71   58.46 
   3   5   2  529.94   55.90 
  -3   5  -2  560.72   59.04 
  -3   5  -2  547.78   58.16 
   3  -5   2  482.37   51.09 
  -3  -5  -2  478.38   51.39 
  -3   5  -2  546.01   58.17 
  -3  -5  -2  496.72   53.35 
   3   5   2  610.74   64.07 
   3  -5   2  562.18   60.92 
  -3  -5  -2  463.99   49.24 
  -3  -5  -3  104.16    8.55 
  -3   5  -3  111.59    9.12 
   3  -5   3  111.50    9.27 
   3   5   3  118.09    9.49 
  -3  -5  -3  106.70    8.79 
   3   5   3   90.22    7.41 
   3  -5   3  104.34    8.83 
   3   5   3   99.85    8.21 
   3   5   3  106.85    8.79 
  -3   5  -3  116.49    9.48 
   3   5   3  113.66    9.26 
   3  -5   3  113.59    9.94 
  -3  -5  -3  114.20    9.26 
  -3   5  -3  114.61    9.17 
   3   5   3  119.42    9.56 
   3  -5   3  100.92    9.77 
  -3  -5  -3  106.13    8.93 
  -3  -5  -3  104.54    8.47 
   3  -5   3  117.08    9.80 
  -3  -5  -3  112.23    9.44 
  -3  -5  -3   96.28    9.12 
  -3   5  -3  113.70    9.07 
  -3  -5  -3  106.09    8.97 
  -3   5  -3  108.47    8.79 
  -3  -5  -3  122.27    9.95 
   3   5   3  105.25    8.59 
   3  -5   3  108.18    9.32 
  -3  -5  -3   98.68    8.09 
  -3   5  -4   70.52    4.91 
   3  -5   4   73.62    5.73 
  -3  -5  -4   74.00    5.03 
  -3   5  -4   36.31    7.66 
   3   5   4   80.61    5.50 
   3  -5   4   76.27    5.97 
  -3  -5  -4   72.34    5.19 
  -3  -5  -4   74.71    5.12 
   3  -5   4   73.49    5.37 
  -3  -5  -4   79.70    5.69 
  -3  -5  -4   74.46    5.49 
  -3   5  -4   70.91    4.82 
  -3   5  -4   82.97    5.69 
  -3  -5  -4   70.04    5.11 
  -3   5  -4   73.07    4.96 
  -3  -5  -4   80.54    5.75 
   3   5   4   70.10    4.79 
  -3  -5  -4   66.44    4.79 
  -3   5  -5  797.49   68.19 
   3  -5   5  804.26   71.09 
   3   5   5  820.00   69.92 
   3  -5   5  900.29   79.79 
  -3  -5  -5  811.63   70.13 
  -3  -5  -5  630.94   55.45 
   3  -5   5  882.21   75.58 
  -3  -5  -5  861.49   73.23 
  -3   5  -5  913.70   75.37 
  -3   5  -5  958.29   79.06 
  -3  -5  -5  823.71   72.12 
  -3   5  -5  878.87   72.53 
  -3   5  -5  841.48   71.73 
  -3  -5  -5  891.04   75.60 
  -3   5  -5  769.76   65.63 
   3  -5   5  799.75   70.09 
  -3  -5  -5  779.79   67.44 
   3  -5   6  227.43   20.52 
  -3  -5  -6  252.36   21.20 
   3  -5   6  234.89   20.02 
  -3  -5  -6  264.44   22.14 
   3   5   6  217.74   18.37 
  -3   5  -6  305.05   25.20 
  -3   5  -6  321.10   26.50 
  -3  -5  -6  234.27   19.73 
  -3   5  -6  286.83   23.70 
  -3   5  -6  279.12   23.22 
  -3  -5  -6  277.48   23.34 
  -3   5  -6  234.53   19.43 
   3  -5   6  226.09   19.47 
  -3  -5  -6  238.32   20.01 
   3  -5   7  139.53   18.83 
  -3  -5  -7  151.97   19.99 
   3  -5   7  140.22   18.70 
  -3  -5  -7  154.30   20.30 
   3   5   7  143.78   19.04 
  -3   5  -7  171.03   22.43 
  -3  -5  -7  141.95   18.76 
  -3   5  -7  170.92   22.43 
  -3  -5  -7  152.48   20.14 
  -3  -5  -7  152.45   20.09 
   3   6  -9   33.72    4.30 
   3  -6  -9   29.65    3.94 
  -3  -6   9   27.90    4.13 
   3  -6  -9   26.48    3.82 
   3   6  -9   27.95    3.94 
   3   6  -9   22.92    3.98 
   3  -6  -9   27.72    4.03 
  -3  -6   9   27.88    4.09 
  -3   6   9   22.69    3.24 
   3  -6  -9   31.24    4.08 
   3   6  -8   21.20    1.78 
   3  -6  -8   18.87    1.87 
   3  -6  -8   26.81    2.12 
  -3  -6   8   24.60    2.15 
   3  -6  -8   25.75    2.18 
  -3   6   8   19.38    1.75 
   3   6  -8   26.86    2.07 
   3   6  -8   30.13    2.30 
   3  -6  -8   22.61    1.95 
   3   6  -8   25.22    1.98 
   3   6  -8   25.91    2.05 
  -3  -6   8   22.36    2.21 
   3  -6  -8   31.44    2.55 
   3  -6  -8   25.99    2.29 
   3   6  -7  420.15   35.68 
   3  -6  -7  445.32   39.78 
   3  -6  -7  479.94   41.28 
  -3  -6   7  334.41   35.10 
   3  -6  -7  424.90   37.16 
   3   6  -7  426.83   36.78 
   3   6  -7  398.35   34.37 
   3   6  -7  443.36   43.62 
   3  -6  -7  404.15   35.04 
   3   6  -7  386.47   33.35 
   3   6  -7  454.53   39.09 
   3  -6  -7  368.34   37.18 
   3  -6  -7  431.67   38.40 
   3   6  -6  323.31   25.74 
  -3  -6   6  253.35   23.98 
  -3   6   6  335.30   26.63 
   3   6  -6  380.86   30.18 
   3  -6  -6  335.72   28.73 
   3  -6  -6  367.40   29.66 
  -3  -6   6  345.37   29.23 
  -3  -6   6  333.29   27.51 
   3  -6  -6  322.04   27.00 
  -3   6   6  310.26   24.51 
   3   6  -6  372.23   30.59 
   3   6  -6  268.58   22.19 
   3   6  -6  399.20   31.88 
   3  -6  -6  331.02   26.65 
   3   6  -6  306.36   24.80 
   3   6  -6  328.87   26.30 
  -3  -6   6  361.13   29.44 
   3  -6  -6  327.20   31.38 
   3  -6  -6  345.30   28.27 
   3   6  -5   27.66    2.05 
  -3  -6   5   27.34    2.25 
  -3   6   5   29.75    2.13 
   3   6  -5   31.01    2.20 
   3  -6  -5   28.23    2.17 
   3  -6  -5   28.10    2.18 
  -3  -6   5   29.50    2.65 
  -3  -6   5   28.73    2.45 
   3  -6  -5   27.26    2.32 
  -3   6   5   28.51    2.08 
   3   6  -5   27.70    2.11 
   3   6  -5   26.99    2.27 
   3  -6  -5   27.51    2.45 
   3   6  -5   24.20    1.72 
   3   6  -5   28.70    2.13 
  -3  -6   5   30.22    2.85 
   3   6  -5   25.90    1.89 
   3  -6  -5   35.86    2.80 
   3  -6  -5   28.34    2.33 
   3   6  -4  742.45   76.83 
  -3  -6   4  691.42   72.51 
   3  -6  -4  687.30   71.20 
   3   6  -4  720.14   73.95 
  -3   6   4  710.17   73.63 
  -3  -6   4  727.99   75.53 
   3  -6  -4  714.13   73.92 
   3  -6  -4  652.66   68.43 
   3  -6  -4  638.30   66.79 
   3   6  -4  797.72   83.17 
   3  -6  -4  725.54   74.95 
  -3  -6   4  765.98   81.56 
  -3   6   4  809.65   83.41 
   3   6  -4  525.16   70.00 
   3  -6  -4  770.65   83.48 
   3  -6  -4  801.52   84.88 
  -3  -6   4  794.34   83.47 
  -3  -6   4  752.45   79.36 
   3  -6  -4  762.63   80.52 
  -3   6   4  755.42   78.90 
   3   6  -4  741.81   79.83 
   3   6  -4  512.10   94.09 
   3  -6  -4  749.91   78.68 
   3   6  -4  718.73   74.04 
  -3  -6   4  688.73   75.28 
   3   6  -4  813.28   84.97 
   3  -6  -4  924.19   95.37 
   3  -6  -4  835.83   88.12 
  -3   6   3  491.04   39.28 
   3   6  -3  488.84   39.31 
   3  -6  -3  446.80   36.31 
  -3  -6   3  449.29   37.22 
   3  -6  -3  463.11   37.64 
  -3   6   3  464.76   37.18 
   3   6  -3  412.97   34.74 
  -3   6   3  468.65   37.64 
   3   6  -3  455.88   36.47 
  -3  -6   3  452.58   36.77 
   3  -6  -3  460.97   37.86 
   3  -6  -3  434.28   36.00 
   3  -6  -3  404.65   34.45 
  -3   6   3  529.03   42.66 
   3   6  -3  516.66   42.07 
   3  -6  -3  518.45   43.13 
  -3  -6   3  507.96   42.57 
  -3   6   3  463.85   40.84 
   3   6  -3  495.88   39.54 
   3  -6  -3  377.52   32.58 
   3  -6  -3  501.43   41.13 
  -3  -6   3  491.83   40.17 
  -3  -6   3  495.69   41.62 
   3  -6  -3  442.35   36.42 
  -3   6   3  477.46   38.25 
   3   6  -3  527.91   42.55 
  -3   6   3  468.04   37.50 
   3  -6  -3  464.02   39.15 
  -3  -6   3  505.33   41.69 
   3   6  -3  476.94   39.79 
   3  -6  -3  564.84   45.20 
   3  -6  -3  494.06   42.09 
  -3   6   2  378.35   30.86 
   3   6  -2  372.33   30.64 
   3  -6  -2  344.36   28.87 
  -3  -6   2  375.52   31.43 
   3  -6  -2  349.12   28.64 
  -3   6   2  343.83   28.38 
   3   6  -2  382.90   31.02 
   3   6  -2  336.41   27.77 
  -3  -6   2  358.40   29.60 
   3  -6  -2  354.85   29.65 
   3  -6  -2  338.88   28.46 
  -3   6   2  381.57   31.77 
   3   6  -2  412.23   34.21 
   3  -6  -2  436.74   41.07 
  -3  -6   2  387.86   33.26 
  -3   6   2  394.69   32.72 
   3   6  -2  361.59   30.48 
   3   6  -2  403.58   32.81 
   3  -6  -2  388.74   32.43 
  -3  -6   2  388.95   31.83 
   3  -6  -2  343.13   28.61 
  -3  -6   2  383.34   32.62 
   3  -6  -2  325.53   26.68 
  -3   6   2  391.26   31.69 
   3   6  -2  401.38   33.41 
  -3   6   2  396.40   32.62 
   3  -6  -2  370.17   30.99 
  -3  -6   2  400.84   33.42 
   3   6  -2  389.00   33.24 
   3  -6  -2  347.43   32.47 
   3  -6  -2  386.23   33.76 
  -3   6   1  107.10    8.82 
   3   6  -1  123.58   10.30 
   3  -6  -1  115.07    9.91 
  -3  -6   1  109.35    9.43 
   3  -6  -1  109.64    9.27 
  -3   6   1  108.67    9.14 
   3   6  -1  124.58   10.18 
  -3  -6   1  111.55    9.46 
   3  -6  -1  111.94    9.45 
   3  -6  -1  101.12    8.59 
  -3   6   1  124.74   10.33 
   3   6  -1  123.22   10.45 
   3  -6  -1  119.81   10.66 
  -3  -6   1  119.74   10.48 
  -3   6   1   87.15   15.72 
   3   6  -1  129.42   10.52 
   3  -6  -1  120.41   10.24 
  -3  -6   1  119.93    9.90 
   3  -6  -1  112.31    9.30 
  -3  -6   1   97.23   10.05 
  -3   6   1  114.57    9.36 
   3   6  -1  101.22    8.31 
   3  -6  -1  111.95    9.49 
  -3  -6   1  129.10   10.77 
   3   6  -1  128.93   10.56 
   3  -6  -1   98.75    8.03 
   3  -6  -1  121.07   10.43 
  -3  -6   0  458.75   37.63 
  -3   6   0  467.09   37.44 
   3   6   0  454.22   36.88 
   3  -6   0  464.31   38.21 
   3  -6   0  417.15   33.98 
  -3   6   0  455.05   36.25 
   3   6   0  488.55   39.37 
  -3  -6   0  428.42   34.73 
   3  -6   0  434.90   35.96 
  -3   6   0  461.62   38.61 
   3   6   0  504.21   41.67 
   3  -6   0  479.64   42.56 
  -3  -6   0  505.85   41.77 
  -3   6   0  477.82   38.69 
   3   6   0  475.78   40.48 
   3  -6   0  476.11   40.02 
  -3  -6   0  454.45   36.88 
   3  -6   0  448.42   36.53 
  -3  -6   0  475.44   39.62 
  -3   6   0  434.20   35.12 
   3   6   0  457.08   38.56 
  -3   6   0  524.84   42.03 
   3  -6   0  416.20   34.32 
  -3  -6   0  501.57   40.89 
   3   6   0  565.47   44.99 
   3  -6   0  484.73   41.41 
  -3  -6  -1  751.56   77.82 
  -3   6  -1  721.38   74.37 
   3  -6   1  768.62   80.88 
   3  -6   1  761.15   79.35 
  -3   6  -1  727.25   74.91 
   3   6   1  831.19   85.33 
  -3  -6  -1  714.33   73.95 
   3  -6   1  696.91   73.16 
  -3   6  -1  825.48   85.48 
   3   6   1  813.04   85.88 
   3  -6   1  858.91   89.56 
  -3  -6  -1  832.83   86.91 
  -3   6  -1  768.41   79.54 
   3   6   1  901.12   92.68 
   3  -6   1  841.72   88.85 
  -3  -6  -1  647.60   67.84 
  -3  -6  -1  754.39   78.00 
   3  -6   1  767.97   80.00 
  -3  -6  -1  787.56   82.64 
   3   6   1  676.86   71.59 
  -3   6  -1  738.73   75.92 
   3   6   1  845.42   86.79 
  -3   6  -1  738.17   84.04 
  -3   6  -1  766.41   78.96 
  -3  -6  -1  813.72   84.81 
   3   6   1  873.11   89.78 
   3  -6   1  787.48   84.47 
  -3   6  -2   37.97    2.82 
   3   6   2   44.12    3.19 
   3  -6   2   35.51    2.93 
  -3  -6  -2   39.67    2.94 
  -3   6  -2   17.16    3.81 
   3   6   2   37.69    2.70 
   3  -6   2   35.76    3.17 
  -3  -6  -2   33.76    2.53 
  -3  -6  -2   32.32    2.40 
   3  -6   2   26.68    2.40 
  -3  -6  -2   39.43    3.01 
   3   6   2   29.43    2.29 
   3   6   2   35.40    2.43 
  -3   6  -2   35.50    2.54 
  -3   6  -2   36.15    2.57 
  -3  -6  -2   35.39    2.79 
   3   6   2   35.99    2.57 
   3  -6   2   32.12    2.70 
  -3   6  -3  600.19   48.22 
   3   6   3  638.69   51.18 
   3  -6   3  626.26   53.75 
  -3  -6  -3  655.24   55.75 
  -3   6  -3  663.13   56.37 
   3   6   3  687.84   60.70 
   3  -6   3  681.67   60.24 
  -3  -6  -3  597.91   48.44 
   3  -6   3  632.91   51.76 
  -3  -6  -3  630.63   50.65 
   3   6   3  647.74   56.43 
  -3   6  -3  639.39   50.57 
  -3   6  -3  723.49   61.74 
  -3  -6  -3  530.86   42.97 
  -3   6  -3  624.33   49.39 
  -3  -6  -3  636.43   52.06 
   3   6   3  657.10   57.83 
   3  -6   3  611.55   50.48 
  -3   6  -4    5.17    0.84 
   3  -6   4    5.57    1.00 
  -3   6  -4    6.20    0.67 
   3   6   4    7.36    0.86 
   3  -6   4    6.87    1.51 
  -3  -6  -4    5.68    1.04 
   3  -6   4    5.72    1.65 
  -3  -6  -4    6.27    0.99 
   3   6   4    8.08    1.03 
  -3   6  -4    5.94    0.82 
  -3   6  -4    7.28    1.05 
  -3  -6  -4    8.22    1.36 
  -3   6  -4    6.35    0.98 
  -3  -6  -4    5.81    1.20 
   3   6   4    5.70    0.84 
   3  -6   4    5.37    1.12 
  -3  -6  -4    4.99    1.22 
  -3   6  -5  103.82    7.59 
   3  -6   5  102.37    7.69 
   3   6   5  123.70    9.02 
   3  -6   5  107.25    8.12 
  -3  -6  -5  100.26    7.39 
   3  -6   5   94.51    7.41 
  -3  -6  -5  109.51    8.20 
   3   6   5  101.70    7.66 
  -3   6  -5  118.50    8.65 
  -3   6  -5  126.36    9.23 
  -3  -6  -5   89.76    6.79 
  -3   6  -5  113.72    8.30 
  -3  -6  -5  113.38    8.38 
   3   6   5   96.12    7.32 
   3  -6   5   91.84    6.94 
  -3  -6  -5   89.19    6.62 
   3   6   6    3.83    1.06 
   3  -6   6    2.42    1.33 
  -3  -6  -6    2.92    1.18 
   3  -6   6    3.74    1.37 
  -3  -6  -6    3.79    1.15 
   3   6   6    2.04    1.25 
  -3   6  -6    3.83    1.09 
  -3   6  -6    3.40    1.02 
  -3  -6  -6    3.12    1.20 
  -3   6  -6    3.98    1.04 
  -3  -6  -6    3.64    1.14 
   3   7  -8    5.96    0.99 
   3  -7  -8    6.04    1.20 
   3  -7  -8    5.02    1.26 
   3  -7  -8    3.97    1.34 
  -3  -7   8    2.71    1.44 
  -3   7   8    2.91    1.08 
   3  -7  -8    4.95    1.23 
   3   7  -7   40.04    5.29 
   3  -7  -7   40.10    5.91 
   3  -7  -7   47.02    6.23 
  -3  -7   7   46.65    6.28 
  -3  -7   7   39.96    5.45 
   3  -7  -7   45.20    6.06 
  -3   7   7   46.49    6.14 
   3   7  -7   51.07    6.77 
   3  -7  -7   44.07    5.94 
  -3  -7   7   46.77    6.36 
  -3   7   7   43.39    5.81 
   3  -7  -7   43.86    5.92 
   3  -7  -6  277.66   21.07 
   3  -7  -6  278.07   20.57 
  -3  -7   6  264.35   19.56 
  -3  -7   6  268.44   20.34 
   3  -7  -6  253.59   19.21 
  -3   7   6  280.41   20.39 
   3   7  -6  275.50   20.76 
   3   7  -6  302.04   22.06 
   3  -7  -6  268.09   20.11 
  -3  -7   6  272.70   20.92 
  -3   7   6  238.93   17.51 
   3  -7  -6  273.22   20.49 
   3   7  -5  211.13   17.57 
  -3  -7   5  205.42   17.22 
  -3   7   5  182.61   15.69 
   3   7  -5  218.38   18.17 
   3  -7  -5  188.55   16.11 
   3  -7  -5  207.43   17.51 
  -3  -7   5  207.99   17.49 
  -3  -7   5  197.18   16.81 
   3  -7  -5  153.29   13.31 
  -3   7   5  157.56   22.82 
   3   7  -5  207.21   17.65 
   3   7  -5  215.49   17.94 
   3  -7  -5  198.38   16.83 
  -3  -7   5  210.07   17.93 
   3  -7  -5  207.97   17.66 
   3   7  -4   74.19    6.45 
  -3  -7   4   73.20    6.53 
  -3   7   4   67.68    5.85 
   3   7  -4   72.84    6.37 
   3  -7  -4   63.84    5.63 
   3  -7  -4   74.03    6.68 
  -3  -7   4   72.28    6.34 
   3  -7  -4   61.77    5.52 
  -3   7   4   51.31    8.07 
   3   7  -4   68.44    5.97 
   3  -7  -4   63.38    5.76 
  -3  -7   4   65.81    6.12 
   3   7  -4   72.84    6.23 
   3  -7  -4   66.56    6.02 
  -3   7   3   75.09    6.03 
   3   7  -3   69.93    5.78 
   3  -7  -3   75.51    6.17 
  -3  -7   3   69.46    5.82 
  -3   7   3   74.50    6.02 
   3   7  -3   71.12    5.91 
   3  -7  -3   74.21    6.32 
  -3  -7   3   61.59    5.11 
  -3  -7   3   75.99    6.42 
  -3   7   3   73.80    5.91 
   3   7  -3   76.17    6.17 
   3  -7  -3   66.19    5.51 
  -3  -7   3   75.87    6.34 
  -3   7   3   67.25    5.40 
   3   7  -3   75.15    6.07 
   3  -7  -3   72.22    6.05 
  -3   7   2   97.17    7.82 
   3   7  -2  100.67    8.25 
   3  -7  -2  100.65    8.31 
  -3  -7   2   96.62    8.05 
  -3   7   2   89.33    7.24 
   3   7  -2   88.95    7.19 
   3  -7  -2   89.53    7.62 
  -3  -7   2   86.31    6.98 
  -3  -7   2   84.55    7.04 
   3  -7  -2   82.31    6.64 
  -3   7   2   72.02    7.56 
   3   7  -2   86.65    6.90 
  -3   7   2   74.40    6.38 
   3  -7  -2   80.15    6.67 
  -3  -7   2   78.80    7.21 
  -3   7   2   75.60    6.06 
   3   7  -2   92.01    7.84 
   3  -7  -2   94.25    8.01 
  -3   7   1   65.49    5.32 
   3   7  -1   64.88    5.37 
   3  -7  -1   68.14    5.78 
  -3  -7   1   63.23    5.38 
   3   7  -1   45.36    4.66 
   3  -7  -1   61.46    5.18 
  -3  -7   1   56.56    4.57 
   3  -7  -1   57.21    4.66 
  -3  -7   1   55.34    4.92 
  -3   7   1   60.49    4.88 
   3   7  -1   59.90    5.07 
  -3   7   1   46.30    5.49 
  -3  -7   1   31.09    8.60 
   3   7  -1   62.42    5.48 
   3  -7  -1   62.62    5.29 
  -3   7   0   58.15    4.72 
   3   7   0   61.34    5.02 
   3  -7   0   60.57    5.21 
  -3  -7   0   57.42    4.81 
  -3   7   0   26.36    5.95 
   3   7   0   55.14    4.47 
   3  -7   0   54.00    4.74 
  -3  -7   0   51.64    4.42 
  -3   7   0   50.24    4.07 
   3   7   0   48.83    4.57 
  -3   7   0   55.32    4.50 
  -3  -7   0   52.27    4.49 
   3   7   0   54.91    4.69 
   3  -7   0   51.01    4.37 
  -3   7  -1  250.10   21.86 
   3   7   1  239.94   20.89 
   3  -7   1  237.48   21.45 
  -3  -7  -1  250.34   21.87 
  -3   7  -1  240.37   20.58 
   3   7   1  226.38   20.77 
   3  -7   1  242.61   21.47 
  -3  -7  -1  200.96   17.38 
   3  -7   1  214.88   18.57 
  -3  -7  -1  223.51   19.70 
  -3   7  -1  220.06   18.96 
   3   7   1  245.41   21.08 
  -3   7  -1  162.85   19.72 
  -3  -7  -1  232.03   20.12 
   3   7   1  284.37   24.20 
   3  -7   1  219.41   19.75 
  -3   7  -2  183.85   15.39 
   3   7   2  175.56   14.66 
   3  -7   2  184.95   16.07 
  -3  -7  -2  176.94   14.70 
  -3   7  -2  125.65   13.23 
   3   7   2  198.73   16.43 
   3  -7   2  169.87   14.53 
  -3  -7  -2  146.87   12.34 
   3  -7   2  148.48   12.51 
  -3  -7  -2  159.76   13.59 
  -3   7  -2   89.78   20.57 
  -3  -7  -2  169.31   14.20 
   3   7   2  206.02   17.04 
   3  -7   2  146.30   12.76 
  -3   7  -3  293.20   21.67 
   3   7   3  253.80   18.55 
   3  -7   3  286.45   22.28 
  -3  -7  -3  267.84   19.52 
  -3   7  -3  189.56   19.57 
   3   7   3  319.60   23.22 
   3  -7   3  305.09   22.88 
  -3  -7  -3  237.41   17.41 
   3  -7   3  188.55   17.15 
  -3  -7  -3  201.68   19.46 
   3   7   3  236.67   17.55 
  -3   7  -3  313.07   22.76 
  -3  -7  -3  268.91   19.86 
   3   7   3  274.15   20.78 
   3  -7   3  237.96   17.84 
  -3   7  -4    7.50    1.36 
   3  -7   4    6.17    1.41 
  -3   7  -4    3.07    1.23 
   3   7   4    8.27    1.52 
   3  -7   4    6.61    1.65 
  -3  -7  -4    6.83    1.38 
   3  -7   4    6.94    1.61 
  -3  -7  -4    7.09    1.38 
   3   7   4    6.94    1.29 
  -3   7  -4    5.43    1.58 
  -3  -7  -4    7.64    1.43 
   3   7   4    7.67    1.35 
   3   7   5    2.37    1.04 
   3  -7   5    2.53    1.34 
  -3  -7  -5    1.89    1.17 
  -3   7  -5    1.19    1.06 
   3   8  -6    1.03    1.00 
  -3  -8   6    0.41    1.36 
  -3   8   6    1.28    1.08 
   3  -8  -6    0.77    1.25 
   3   8  -5   16.06    2.30 
   3   8  -5   18.80    2.65 
   3  -8  -5   15.83    2.38 
  -3  -8   5   14.58    2.19 
  -3   8   5   14.40    2.07 
   3   8  -5    9.32    1.48 
  -3  -8   5   14.84    2.42 
  -3   8   5   12.74    1.87 
   3  -8  -5   14.11    2.14 
   3   8  -4   10.66    1.83 
  -3  -8   4   11.05    2.00 
  -3   8   4   10.21    1.77 
   3   8  -4   11.19    1.89 
   3  -8  -4   12.26    2.26 
  -3  -8   4    5.68    1.41 
  -3   8   4    7.60    1.68 
   3   8  -4   11.06    1.94 
  -3  -8   4   13.50    2.65 
  -3   8   4   12.09    2.11 
   3  -8  -4    9.07    1.84 
   3   8  -3   24.59    4.11 
  -3  -8   3   21.13    3.68 
  -3   8   3    8.85    2.12 
   3   8  -3   22.51    3.73 
   3  -8  -3   18.89    3.26 
  -3  -8   3   19.83    3.39 
  -3   8   3   21.04    3.54 
   3   8  -3   23.43    3.92 
  -3  -8   3   22.63    3.92 
  -3   8   3   15.08    2.59 
   3   8  -3   22.12    3.68 
   3  -8  -3   19.08    3.41 
  -3   8   2    5.19    0.78 
   3   8  -2    4.84    0.77 
   3  -8  -2    6.86    1.14 
  -3  -8   2    4.65    1.07 
  -3   8   2    4.88    0.68 
   3  -8  -2    4.04    1.14 
  -3  -8   2    4.86    1.08 
  -3   8   2    0.86    0.82 
   3   8  -2    3.02    0.73 
  -3  -8   2    4.07    1.54 
   3   8  -2    5.54    0.71 
   3  -8  -2    5.11    1.01 
  -3   8   1   28.43    2.16 
   3   8  -1   25.49    2.13 
   3  -8  -1   26.95    2.21 
  -3  -8   1   24.38    2.49 
  -3   8   1   27.38    2.09 
   3  -8  -1   26.02    2.20 
  -3  -8   1   23.95    2.18 
  -3   8   1   18.67    2.08 
   3   8  -1   20.83    2.28 
  -3  -8   1   27.91    2.39 
   3   8  -1   26.75    2.29 
   3  -8  -1   23.35    1.98 
  -3   8   0   52.19    6.91 
   3   8   0   52.01    6.90 
   3  -8   0   50.62    6.82 
  -3  -8   0   52.33    7.02 
  -3   8   0   51.51    6.79 
   3  -8   0   48.48    6.48 
  -3  -8   0   48.23    6.51 
  -3   8   0   50.49    6.64 
   3   8   0   46.49    6.30 
  -3   8   0   47.07    6.22 
  -3  -8   0   43.55    5.89 
   3   8   0   51.29    6.85 
   3  -8   0   36.39    5.30 
  -3   8  -1   17.37    2.93 
   3  -8   1   17.33    3.02 
  -3  -8  -1   18.25    3.16 
  -3   8  -1   17.24    2.90 
   3   8   1   14.82    2.52 
   3  -8   1   16.19    2.84 
   3   8   1   13.67    2.30 
  -3   8  -1   16.27    2.73 
  -3  -8  -1   15.77    2.76 
   3   8   1   17.65    2.98 
   3  -8   1   12.76    2.35 
  -3   8  -2  100.79   12.83 
   3  -8   2  101.44   13.05 
  -3  -8  -2   91.98   11.68 
  -3   8  -2   70.61   11.57 
   3   8   2   84.16   10.87 
   3  -8   2   90.94   11.69 
  -3  -8  -2   85.98   11.01 
  -3   8  -2   71.03   10.00 
  -3  -8  -2   88.06   11.28 
   3   8   2   76.97   13.74 
   3  -8   3   13.30    2.18 
  -3  -8  -3   15.10    2.26 
  -3   8  -3   17.47    2.53 
   3   8   3   16.10    2.32 
   4   0 -10   10.64    0.91 
   4   0 -10   11.63    1.04 
   4   0 -10   10.62    0.96 
   4   0 -10    9.75    1.06 
   4   0 -10    9.16    0.85 
   4   0  -9  384.76   31.12 
   4   0  -9  494.71   39.49 
   4   0  -9  488.18   39.93 
   4   0  -9  507.80   41.31 
   4   0  -9  488.41   40.45 
   4   0  -9  493.21   40.24 
   4   0  -9  379.43   36.99 
   4   0  -8  292.44   25.69 
  -4   0   8  335.80   29.07 
   4   0  -8  301.54   26.18 
  -4   0   8  323.50   28.14 
   4   0  -8  340.38   28.90 
   4   0  -8  305.71   26.58 
   4   0  -8  322.49   27.38 
   4   0  -8  330.46   28.45 
   4   0  -8  347.63   30.87 
   4   0  -8  345.76   29.50 
   4   0  -8  328.28   27.98 
   4   0  -8  307.31   27.04 
   4   0  -7    2.32    0.95 
  -4   0   7    1.36    1.10 
   4   0  -7    2.69    0.84 
  -4   0   7    0.69    1.20 
   4   0  -7    2.06    0.66 
   4   0  -7    2.64    0.77 
   4   0  -7    2.38    0.78 
   4   0  -7    1.65    0.55 
   4   0  -7    3.18    0.82 
   4   0  -7    2.43    0.62 
   4   0  -7    2.68    0.81 
   4   0  -7    2.00    0.64 
   4   0  -7    2.49    0.67 
   4   0  -6  119.28   11.98 
  -4   0   6  139.89   11.25 
   4   0  -6  145.12   11.57 
  -4   0   6  140.43   11.83 
   4   0  -6  131.58   11.17 
   4   0  -6  137.78   11.93 
   4   0  -6  118.46    9.18 
   4   0  -6  136.66   11.12 
   4   0  -6  138.85   10.82 
   4   0  -6  137.09   10.74 
   4   0  -6  143.91   11.70 
   4   0  -6  138.44   10.96 
   4   0  -6  147.08   11.42 
   4   0  -6  135.93   10.77 
  -4   0   5   16.15    1.36 
   4   0  -5   17.37    1.39 
   4   0  -5   13.82    1.22 
  -4   0   5   19.51    1.80 
   4   0  -5   20.76    1.77 
  -4   0   5   23.31    2.03 
   4   0  -5   19.28    1.65 
   4   0  -5   20.09    1.71 
   4   0  -5   26.32    2.02 
   4   0  -5   23.76    1.78 
  -4   0   4  146.33   11.06 
   4   0  -4  147.89   11.00 
   4   0  -4  157.24   11.24 
  -4   0   4  158.67   12.00 
   4   0  -4  167.42   11.95 
  -4   0   4  170.36   12.61 
  -4   0   4  143.78   10.18 
   4   0  -4  150.96   11.12 
   4   0  -4  159.65   12.15 
   4   0  -4  173.09   12.94 
   4   0  -4  135.38   10.61 
   4   0  -4  153.69   11.06 
   4   0  -4  165.21   11.58 
   4   0  -4  168.87   11.84 
  -4   0   3   36.70    2.79 
   4   0  -3   39.02    2.89 
   4   0  -3   35.70    2.70 
  -4   0   3   33.37    2.94 
   4   0  -3   34.44    2.60 
  -4   0   3   34.32    2.74 
  -4   0   3   29.28    2.22 
   4   0  -3   30.00    2.37 
   4   0  -3   39.23    3.22 
   4   0  -3   36.89    3.06 
   4   0  -3   28.68    2.24 
   4   0  -3   33.83    2.48 
   4   0  -3   27.53    2.03 
   4   0  -3   29.62    2.15 
  -4   0   2 1531.35  107.11 
   4   0  -2 1525.65  107.20 
   4   0  -2 1403.35   99.32 
   4   0  -2 1203.00   85.07 
  -4   0   2 1352.51  102.67 
   4   0  -2 1324.96   96.17 
  -4   0   2 1378.79   98.13 
  -4   0   2 1244.37   88.22 
   4   0  -2 1465.66  105.16 
   4   0  -2 1458.66  104.99 
   4   0  -2 1420.13  103.55 
   4   0  -2 1202.65   85.77 
   4   0  -2 1464.23  102.00 
   4   0  -2 1411.48   99.23 
  -4   0   1 1599.90  118.60 
   4   0  -1 1689.06  128.94 
   4   0  -1 1660.13  123.24 
  -4   0   1 1637.22  114.21 
  -4   0   1 1650.42  117.66 
   4   0  -1 1760.61  123.17 
  -4   0   1 1701.90  123.18 
  -4   0   1 1547.72  115.09 
   4   0  -1 1794.44  128.49 
   4   0  -1 1778.61  127.42 
   4   0  -1 1906.49  133.91 
  -4   0   1 1681.32  116.80 
   4   0  -1 1663.69  120.85 
  -4   0   1 1679.26  117.30 
   4   0  -1 1829.50  127.71 
  -4   0   1 1746.35  122.80 
  -4   0   0  145.91   10.23 
   4   0   0  151.08   10.59 
   4   0   0  148.25   10.43 
  -4   0   0  133.66    9.35 
  -4   0   0  131.94    9.75 
   4   0   0  130.93    9.35 
  -4   0   0  129.15    9.53 
  -4   0   0  119.77    8.92 
   4   0   0  119.78    8.45 
   4   0   0  130.06    9.33 
   4   0   0  130.94    9.23 
   4   0   0  115.74    8.19 
  -4   0   0  113.98    8.04 
   4   0   0  119.56    8.48 
   4   0   0  120.43    8.51 
  -4   0   0  130.85    9.17 
  -4   0   0  132.79    9.45 
  -4   0  -1  903.85   63.91 
   4   0   1  930.81   65.92 
   4   0   1  983.28   69.92 
  -4   0  -1  832.37   60.86 
   4   0   1  809.70   58.83 
  -4   0  -1  779.71   61.48 
  -4   0  -1  944.95   67.74 
   4   0   1  907.22   64.45 
   4   0   1  874.12   62.01 
   4   0   1  943.19   67.24 
  -4   0  -1  871.49   61.50 
   4   0   1  969.42   68.44 
   4   0   1  733.53   53.00 
  -4   0  -1  808.15   57.18 
  -4   0  -1  840.30   60.01 
   4   0   1  879.25   62.40 
   4   0   1  909.24   64.69 
  -4   0  -1  812.37   57.78 
  -4   0  -1  878.04   62.10 
  -4   0  -2  345.61   27.52 
   4   0   2  343.39   26.52 
   4   0   2  445.57   34.66 
  -4   0  -2  384.25   29.99 
  -4   0  -2  374.19   29.37 
  -4   0  -2  388.24   30.04 
   4   0   2  391.79   30.48 
   4   0   2  387.03   30.13 
   4   0   2  394.04   30.73 
  -4   0  -2  355.19   27.48 
   4   0   2  381.61   29.69 
   4   0   2  297.92   23.29 
  -4   0  -2  377.12   29.13 
  -4   0  -2  375.61   29.14 
  -4   0  -2  380.56   29.33 
   4   0   2  384.74   29.69 
  -4   0  -2  383.40   30.10 
   4   0   2  418.41   32.58 
  -4   0  -2  395.53   30.82 
  -4   0  -2  335.58   26.02 
  -4   0  -2  393.23   30.34 
  -4   0  -2  398.25   30.79 
  -4   0  -3  712.02   44.34 
   4   0   3  725.03   45.17 
   4   0   3  809.05   50.72 
  -4   0  -3  611.38   38.50 
  -4   0  -3  616.25   39.26 
  -4   0  -3  718.38   44.73 
   4   0   3  779.96   49.02 
   4   0   3  743.41   46.92 
   4   0   3  686.73   43.29 
  -4   0  -3  571.58   50.49 
   4   0   3  725.49   45.20 
  -4   0  -3  724.47   45.23 
  -4   0  -3  708.73   44.51 
  -4   0  -3  707.35   44.04 
   4   0   3  714.89   45.07 
  -4   0  -3  702.71   44.25 
   4   0   3  774.31   48.93 
  -4   0  -3  688.77   43.52 
  -4   0  -3  750.01   47.09 
  -4   0  -3  734.64   45.69 
  -4   0  -3  743.07   46.78 
  -4   0  -4  728.75   61.50 
   4   0   4  754.34   63.69 
   4   0   4  868.54   73.48 
  -4   0  -4  733.41   62.15 
  -4   0  -4  708.17   59.91 
  -4   0  -4  775.62   65.47 
   4   0   4  769.88   65.29 
   4   0   4  748.78   63.50 
   4   0   4  727.42   61.63 
  -4   0  -4  671.67   56.66 
   4   0   4  736.54   62.14 
  -4   0  -4  774.86   65.46 
  -4   0  -4  801.91   67.69 
  -4   0  -4  779.90   65.80 
   4   0   4  764.69   64.87 
  -4   0  -4  810.52   68.49 
   4   0   4  827.78   69.97 
  -4   0  -4  724.61   61.24 
  -4   0  -4  742.95   66.95 
  -4   0  -4  797.39   67.28 
  -4   0  -4  794.24   67.32 
   4   0   5  620.24   49.39 
  -4   0  -5  603.61   48.00 
  -4   0  -5  599.08   47.60 
   4   0   5  604.20   48.14 
   4   0   5  589.00   46.90 
   4   0   5  544.39   43.35 
  -4   0  -5  616.12   48.97 
  -4   0  -5  645.97   51.27 
  -4   0  -5  645.40   51.23 
   4   0   5  590.06   47.00 
   4   0   5  635.90   50.60 
  -4   0  -5  586.03   46.54 
  -4   0  -5  629.41   49.98 
  -4   0  -5  679.08   53.89 
  -4   0  -5  650.52   51.72 
  -4   0  -6  109.25    7.41 
  -4   0  -6  110.77    7.45 
  -4   0  -6  110.06    7.40 
  -4   0  -6  108.18    7.26 
   4   0   6  103.49    7.02 
  -4   0  -6  115.54    7.83 
  -4   0  -6  111.37    7.53 
  -4   0  -6  104.18    7.07 
  -4   0  -7   23.73    2.13 
  -4   0  -7   22.95    2.02 
  -4   0  -7   24.77    2.18 
   4   0   7   24.95    2.34 
  -4   0  -7   26.43    2.34 
  -4   0  -7   24.78    2.19 
  -4   0  -8   42.48    5.65 
  -4   0  -8   47.70    6.31 
  -4   0  -8   44.85    5.93 
   4   0   8   38.59    5.14 
  -4   0  -8   44.69    5.91 
  -4   0  -8   40.32    5.36 
   4   0   8   40.99    5.48 
   4   1 -11   49.25    4.19 
   4   1 -11   43.27    4.18 
   4   1 -11   46.71    3.94 
   4   1 -11   28.98    3.35 
   4   1 -10  113.59    7.66 
   4  -1 -10   84.62    5.75 
   4   1 -10   94.25    6.39 
   4   1 -10  107.52    7.42 
   4   1 -10   91.05    8.63 
   4   1 -10  112.57    7.69 
   4   1 -10  106.92    7.30 
   4   1  -9   24.94    2.31 
  -4  -1   9   34.65    3.42 
   4   1  -9   27.66    2.29 
   4  -1  -9   32.25    2.68 
   4  -1  -9   27.59    2.38 
   4   1  -9   35.77    2.94 
   4   1  -9   28.07    2.32 
   4   1  -9   33.03    2.77 
   4   1  -9   34.33    2.90 
   4  -1  -9   24.52    2.14 
   4   1  -9   29.90    2.55 
   4  -1  -9   31.38    2.66 
   4   1  -9   20.29    2.01 
   4  -1  -9   30.68    2.55 
  -4   1   8  209.59   15.14 
   4   1  -8  178.45   14.29 
  -4  -1   8  183.35   13.65 
   4   1  -8  173.73   12.85 
   4  -1  -8  186.14   14.16 
  -4  -1   8  186.33   14.17 
  -4   1   8  184.01   13.60 
   4  -1  -8  182.94   13.59 
   4   1  -8  198.17   14.52 
   4  -1  -8  196.92   14.26 
   4  -1  -8  185.80   14.06 
   4   1  -8  182.74   13.20 
   4  -1  -8  180.79   13.58 
   4   1  -8  175.07   13.81 
   4   1  -8  193.78   14.36 
   4  -1  -8  189.63   13.91 
   4   1  -8  202.75   15.11 
   4  -1  -8  184.86   13.85 
   4   1  -8  185.88   13.86 
   4  -1  -8  190.91   13.93 
   4   1  -8  203.73   14.81 
   4   1  -8  183.74   13.63 
   4  -1  -8  156.69   12.04 
   4   1  -7  254.08   16.20 
  -4  -1   7  275.54   18.52 
   4   1  -7  235.71   15.83 
   4  -1  -7  239.18   16.05 
  -4  -1   7  258.76   18.06 
  -4   1   7  240.26   15.78 
  -4  -1   7  231.29   15.71 
   4  -1  -7  250.66   16.15 
   4  -1  -7  249.83   16.95 
   4   1  -7  272.86   17.25 
   4  -1  -7  271.09   17.12 
   4   1  -7  219.40   14.66 
   4  -1  -7  255.18   17.84 
   4   1  -7  259.34   16.32 
   4  -1  -7  261.44   17.40 
   4   1  -7  236.70   16.94 
   4   1  -7  251.84   16.07 
   4  -1  -7  255.50   16.11 
   4   1  -7  275.04   18.33 
   4  -1  -7  266.99   17.54 
   4  -1  -7  251.80   15.90 
   4   1  -7  263.52   17.28 
   4  -1  -7  257.59   16.85 
   4   1  -7  261.58   16.61 
   4   1  -7  222.18   16.65 
   4  -1  -7  270.42   17.03 
   4   1  -6  122.93    9.67 
   4  -1  -6  112.04    8.74 
  -4  -1   6  100.43    8.44 
  -4   1   6  109.87    8.92 
   4   1  -6  109.49    8.76 
   4  -1  -6  143.48   11.40 
  -4  -1   6  111.64    9.20 
  -4   1   6  118.52    9.74 
  -4  -1   6  103.93    8.70 
   4  -1  -6  110.71    9.24 
   4  -1  -6  106.42    8.78 
   4  -1  -6  112.74    9.64 
   4   1  -6  109.74    8.72 
   4  -1  -6  111.31    8.78 
   4   1  -6  108.86    8.87 
   4  -1  -6  112.75    9.21 
   4   1  -6  108.58    8.44 
   4  -1  -6  110.40    9.00 
   4   1  -6   99.76    8.41 
   4  -1  -6  100.71    8.27 
   4   1  -6  111.75    8.96 
   4  -1  -6  112.32    8.78 
   4   1  -6  120.82   10.08 
   4  -1  -6  115.11    9.28 
   4  -1  -6  100.09    8.15 
   4   1  -6  107.55    8.53 
   4  -1  -6  118.04    9.42 
   4   1  -6  111.37    8.82 
   4   1  -6  111.52    8.77 
   4  -1  -6  116.91    9.10 
  -4  -1   5  486.70   34.78 
   4   1  -5  549.59   39.36 
   4   1  -5  596.75   42.96 
   4  -1  -5  462.55   40.83 
  -4  -1   5  556.13   41.58 
  -4   1   5  496.29   36.73 
   4   1  -5  558.17   41.24 
   4  -1  -5  570.46   42.38 
  -4  -1   5  543.33   40.49 
  -4   1   5  538.31   39.17 
  -4  -1   5  562.43   42.83 
   4  -1  -5  557.29   44.84 
   4  -1  -5  549.34   43.68 
   4   1  -5  518.83   38.57 
   4  -1  -5  596.51   45.16 
   4   1  -5  544.18   39.91 
   4  -1  -5  633.57   45.17 
   4  -1  -5  482.38   42.50 
   4   1  -5  608.83   43.52 
   4  -1  -5  507.00   42.59 
   4   1  -5  650.29   46.80 
   4   1  -5  476.09   35.38 
   4  -1  -5  495.84   46.79 
   4   1  -5  568.56   40.73 
   4   1  -5  592.92   43.20 
   4   1  -5  590.95   41.99 
   4  -1  -5  608.06   43.20 
  -4  -1   4  870.04   64.45 
  -4   1   4  774.50   56.88 
   4   1  -4  916.13   67.49 
   4  -1  -4  828.95   57.49 
   4  -1  -4  827.63   59.59 
   4   1  -4  856.66   63.50 
   4  -1  -4  907.52   62.86 
  -4  -1   4  876.17   65.15 
  -4   1   4  841.36   62.29 
   4   1  -4  936.21   65.85 
   4  -1  -4  925.99   67.14 
  -4  -1   4  874.82   64.29 
  -4   1   4  871.59   62.37 
  -4  -1   4  851.62   63.83 
   4  -1  -4  906.51   72.05 
   4  -1  -4  924.65   68.23 
   4   1  -4  835.74   60.51 
   4   1  -4  933.66   67.35 
   4  -1  -4  953.57   70.32 
   4   1  -4  697.52   48.71 
   4   1  -4  977.23   68.83 
   4  -1  -4  808.27   59.55 
   4  -1  -4  926.06   64.70 
   4   1  -4  948.00   66.80 
   4  -1  -4  770.75   57.73 
  -4  -1   3 2077.94  147.55 
  -4   1   3 1904.13  132.37 
   4   1  -3 2181.77  154.12 
   4  -1  -3 2111.13  147.16 
   4  -1  -3 1831.35  136.63 
  -4   1   3 1995.43  139.06 
   4   1  -3 1966.05  138.97 
  -4  -1   3 1958.87  143.58 
  -4   1   3 1785.09  128.00 
   4   1  -3 2031.32  141.32 
   4  -1  -3 2069.82  145.25 
  -4  -1   3 1973.13  145.53 
  -4   1   3 2059.18  150.60 
  -4  -1   3 1724.69  138.90 
   4  -1  -3 1879.70  145.11 
   4   1  -3 2032.72  149.52 
   4  -1  -3 2022.27  152.57 
   4   1  -3 2145.57  160.93 
   4  -1  -3 2046.90  150.23 
   4   1  -3 1690.09  117.75 
   4  -1  -3 1519.34  115.48 
   4   1  -3 1842.90  129.80 
   4  -1  -3 1954.48  140.86 
   4  -1  -3 1959.18  141.13 
   4   1  -3 1532.97  120.27 
   4   1  -3 1535.73  112.53 
   4  -1  -3 2032.98  142.46 
   4   1  -3 1859.46  133.07 
   4  -1  -3 1915.07  142.86 
   4   1  -3 2133.84  149.15 
   4  -1  -3 2052.50  144.93 
   4   1  -3 2100.64  148.05 
   4  -1  -3 1963.40  136.44 
  -4  -1   2  597.52   42.02 
  -4   1   2  565.61   39.41 
   4   1  -2  632.24   44.49 
   4  -1  -2  571.13   39.89 
   4  -1  -2  532.66   40.25 
  -4   1   2  458.70   31.97 
   4   1  -2  520.19   36.78 
  -4  -1   2  529.53   38.30 
  -4   1   2  524.80   38.22 
   4   1  -2  486.52   38.74 
   4  -1  -2  550.80   38.96 
  -4  -1   2  547.67   40.05 
  -4   1   2  533.03   38.05 
  -4  -1   2  519.27   41.21 
   4   1  -2  609.00   42.67 
   4  -1  -2  563.91   41.35 
   4   1  -2  598.16   43.82 
   4  -1  -2  563.49   40.78 
   4   1  -2  590.20   41.75 
   4  -1  -2  566.30   42.01 
   4   1  -2  561.88   39.21 
  -4  -1   2  558.97   38.99 
   4  -1  -2  497.88   35.83 
  -4   1   2  517.65   36.33 
   4   1  -2  577.94   40.92 
   4  -1  -2  541.27   38.72 
   4  -1  -2  494.56   35.88 
   4   1  -2  595.56   42.36 
   4  -1  -2  598.81   41.67 
  -4  -1   2  568.90   41.81 
   4   1  -2  500.70   36.02 
  -4  -1   1   48.19    3.57 
  -4   1   1   38.73    3.17 
   4   1  -1   51.54    3.73 
   4  -1  -1   48.43    3.89 
   4   1  -1   40.86    3.20 
   4  -1  -1   39.95    3.20 
  -4   1   1   34.94    3.34 
   4   1  -1   37.48    2.75 
  -4  -1   1   42.87    3.47 
  -4   1   1   41.99    3.34 
   4   1  -1   45.53    3.34 
   4  -1  -1   40.08    3.23 
  -4  -1   1   42.61    3.38 
  -4   1   1   39.44    3.04 
  -4  -1   1   38.98    3.02 
  -4   1   1   38.82    2.85 
   4   1  -1   41.75    3.12 
   4  -1  -1   47.28    3.78 
   4   1  -1   39.00    3.17 
   4  -1  -1   42.06    3.32 
   4   1  -1   40.21    3.40 
   4  -1  -1   46.98    3.63 
  -4   1   1   37.31    2.70 
   4   1  -1   48.48    3.42 
   4  -1  -1   50.54    3.62 
  -4  -1   1   44.02    3.32 
   4   1  -1   37.26    2.75 
  -4  -1   1   40.68    2.95 
   4   1  -1   42.38    3.01 
   4  -1  -1   43.82    3.31 
  -4   1   1   41.78    3.04 
   4   1  -1   43.80    3.18 
   4  -1  -1   40.06    2.89 
   4  -1  -1   41.86    3.11 
  -4  -1   0  922.60   64.58 
  -4   1   0  905.10   62.86 
   4   1   0  948.69   66.77 
   4  -1   0  920.52   64.13 
   4   1   0  878.13   67.36 
   4  -1   0  878.73   64.17 
  -4  -1   0  796.66   55.60 
  -4   1   0  829.53   57.58 
  -4  -1   0  852.03   63.10 
  -4   1   0  843.73   60.42 
   4   1   0  867.17   60.47 
   4  -1   0  783.83   57.26 
  -4  -1   0  881.81   62.37 
  -4   1   0  884.52   64.17 
  -4  -1   0  888.70   67.50 
  -4   1   0  833.02   60.09 
   4   1   0 1004.36   69.97 
   4  -1   0  927.07   69.55 
   4   1   0  940.57   66.14 
   4  -1   0  874.36   62.43 
   4   1   0  968.87   67.87 
   4  -1   0  884.85   63.34 
   4   1   0  847.55   58.71 
  -4  -1   0  852.06   60.17 
   4  -1   0  852.81   60.46 
  -4  -1   0  821.06   58.23 
  -4   1   0  630.19   63.85 
   4   1   0  916.27   63.63 
  -4  -1   0  727.87   51.01 
  -4   1   0  937.64   65.41 
   4  -1   0  719.71   82.80 
  -4  -1  -1  191.51   13.64 
  -4   1  -1  219.57   15.60 
   4   1   1  220.40   15.71 
   4  -1   1  223.70   15.88 
   4   1   1  203.86   17.44 
   4  -1   1  221.20   16.00 
  -4   1  -1  195.46   13.88 
  -4  -1  -1  210.03   15.47 
  -4   1  -1  200.91   14.47 
   4   1   1  197.49   14.68 
   4  -1   1  183.46   13.44 
  -4  -1  -1  184.74   13.89 
  -4   1  -1  212.07   15.27 
  -4  -1  -1  211.73   16.53 
  -4   1  -1  221.62   15.75 
   4   1   1  211.97   16.17 
   4  -1   1  228.42   16.90 
   4   1   1  214.72   15.46 
   4  -1   1  219.61   16.37 
   4   1   1  225.63   16.22 
   4  -1   1  218.36   15.97 
  -4   1  -1  199.30   14.28 
   4   1   1  203.44   15.06 
   4  -1   1  198.81   14.59 
  -4  -1  -1  216.76   15.66 
   4   1   1  212.81   15.11 
  -4  -1  -1  179.44   12.70 
  -4   1  -1  198.64   14.36 
  -4  -1  -1  216.48   15.83 
  -4   1  -1  212.39   15.09 
  -4  -1  -1  195.87   13.95 
   4   1   1  227.23   16.19 
   4  -1   1  221.67   16.09 
  -4   1  -1  225.20   16.18 
   4  -1   1  236.77   17.03 
  -4  -1  -1  213.70   15.67 
  -4  -1  -1  233.84   16.62 
  -4   1  -1  230.35   16.43 
  -4  -1  -1  151.74   25.96 
  -4   1  -1  189.89   17.37 
  -4  -1  -1  209.12   15.49 
   4  -1   1  257.92   19.54 
  -4  -1  -1  207.05   15.19 
  -4  -1  -2  410.06   31.70 
  -4   1  -2  407.59   31.47 
   4   1   2  454.65   35.17 
   4  -1   2  416.30   32.15 
   4   1   2  429.28   34.02 
   4  -1   2  415.08   32.55 
  -4  -1  -2  389.23   31.12 
  -4   1  -2  391.33   30.33 
   4   1   2  385.33   29.95 
  -4   1  -2  364.13   28.41 
  -4  -1  -2  395.72   30.95 
  -4  -1  -2  383.77   30.74 
  -4   1  -2  431.95   33.73
[truncated: 304,908 more chars]
